# Supplementary material for: Metabolic Variations among Three New Tea Varieties Cultivated in Shandong, China
Source: MDPI journal article supplement (doi:10.3390/foods12061299), 2023-03-18
Supplement: s1 [file s1]

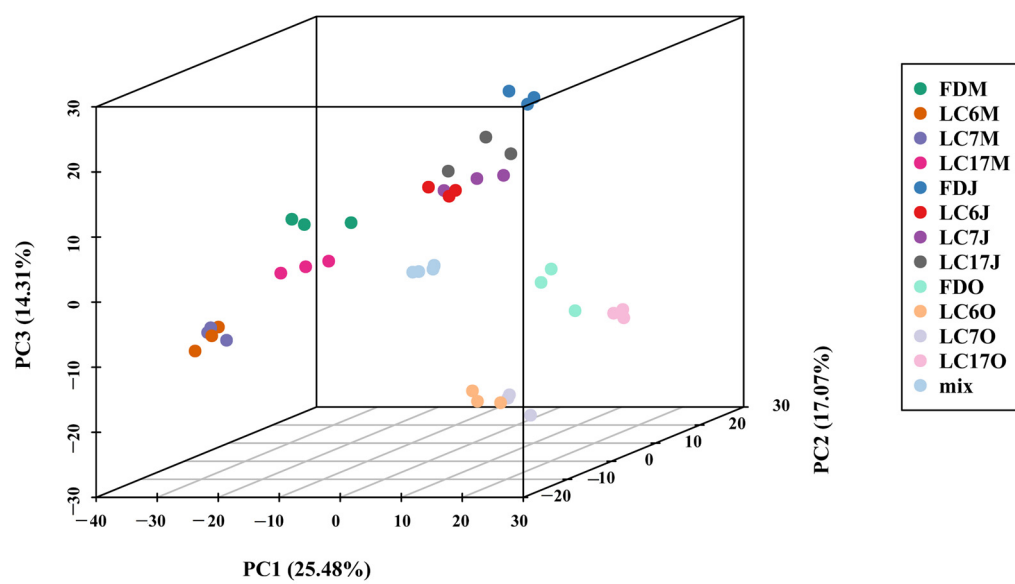

**Figure S1.** The PCA score plot of leaves from LC6, LC7, LC17 and FD tea varieties of different time points.

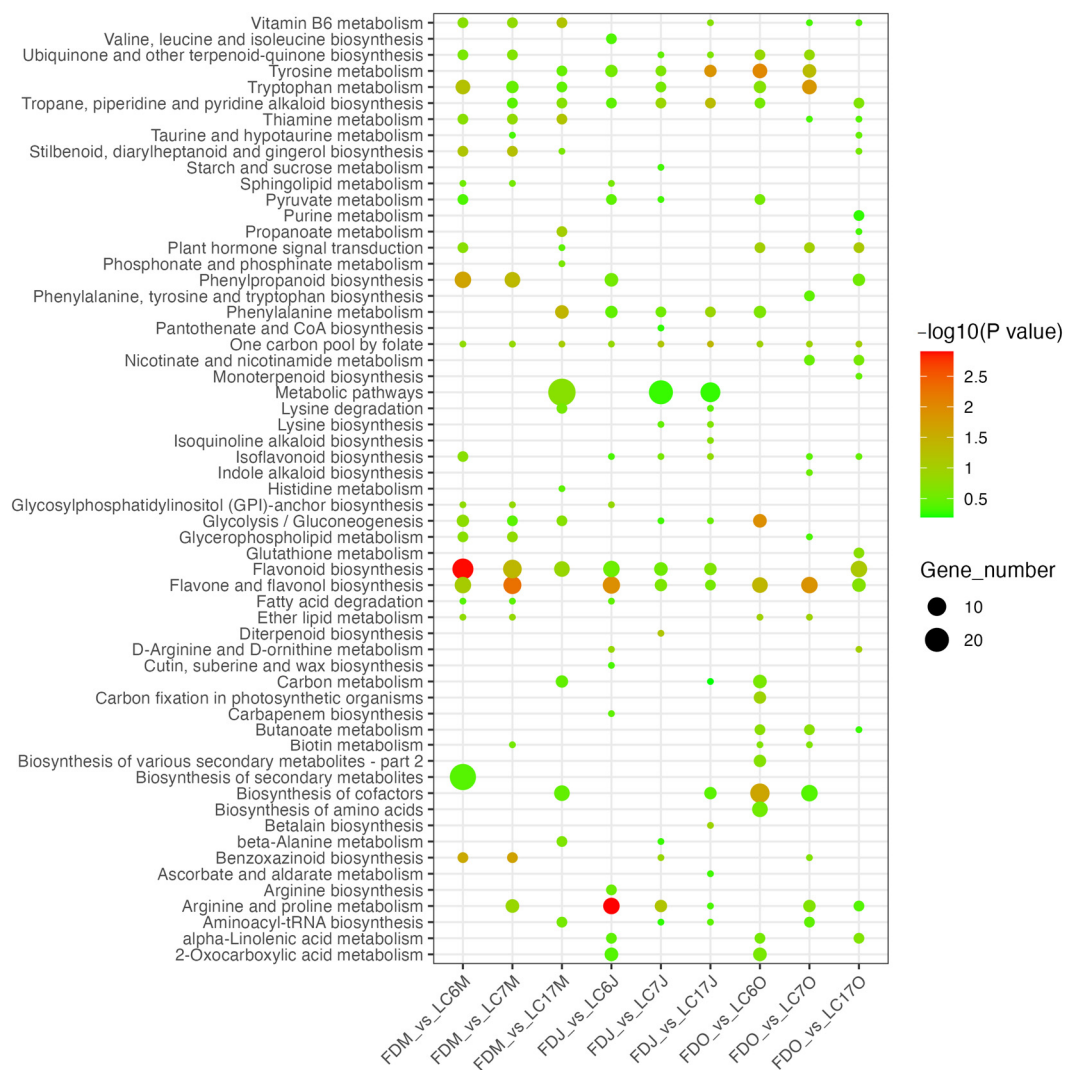

**Figure S2.** The top 20 of KEGG enrichment of SDMs in young shoots of LC6, LC7 and LC17 in different seasons.
