# Supplementary material for: Metabolic Variations among Three New Tea Varieties Cultivated in Shandong, China
Source: Foods. 2023 Mar 18;12(6):1299. doi: 10.3390/foods12061299 (PMC10048610; doi:10.3390/foods12061299)
Supplement: Supplementary file 1 [file foods-12-01299-s001.zip › Table S1.xlsx]

## Sheet: Table S1 The detail information
Index	Q1 (Da)	Q3 (Da)	Molecular Weight (Da)	Formula	Ionization model	Compounds	Class I	Class II	CAS	Level	FDM-1	FDM-2	FDM-3	LC6M-1	LC6M-2	LC6M-3	LC7M-1	LC7M-2	LC7M-3	LC17M-1	LC17M-2	LC17M-3	FDJ-1	FDJ-2	FDJ-3	LC6J-1	LC6J-2	LC6J-3	LC7J-1	LC7J-2	LC7J-3	LC17J-1	LC17J-2	LC17J-3	FDO-1	FDO-2	FDO-3	LC6O-1	LC6O-2	LC6O-3	LC7O-1	LC7O-2	LC7O-3	LC17O-1	LC17O-2	LC17O-3	mix01	mix02	mix03
Zmhn001970	389.12	227.08	390.131	C20H22O8	[M-H]-	Piceid	Others	Stilbene	27208-80-6	2	1146900	984970	1215100	738020	841390	953440	879740	907720	781720	968610	871210	802950	969190	891200	961750	965560	1088000	1082700	1056700	976060	1075500	1137600	1009200	1261100	734190	919200	1019100	999660	925120	1001200	986740	1128100	1026100	1116600	1304100	1302900	900550	956970	928110
pmn001394	405.12	243.1	406.126	C20H22O9	[M-H]-	2,3,5,4'-Tetrahydroxystilbene-2-O-glucoside	Others	Stilbene	82373-94-2	3	54707	39302	36445	41850	33879	38342	39727	38182	22972	8637.2	20754	16862	38770	26097	42474	42226	28354	39304	37282	42525	36727	46208	56245	27636	19565	29345	36943	28910	21038	27410	41383	29270	30238	24747	16297	9740.2	25709	23354	24696
mws1293	565.13	139.1	564.127	C29H24O12	[M+H]+	Theaflavin	Tannins	Proanthocyanidins	4670-05-7	1	784240	691770	658420	1372100	940100	969300	922650	743280	1126900	699020	509650	471930	529150	374180	439270	568410	582550	830700	547020	687330	559280	618280	917710	556360	328900	267270	336700	521700	546950	629780	694230	664150	555590	373520	329780	306880	460270	579090	490140
mws0836	577.14	425.1	578.142	C30H26O12	[M-H]-	Procyanidin B1	Tannins	Proanthocyanidins	20315-25-7	2	623910	790980	600080	1016000	1155300	1017000	1112700	1151300	856780	847870	895680	706520	1104800	958290	972920	1316600	1319900	1748800	1372500	1954800	1518900	1411200	1472000	1100800	717040	550240	626540	1143600	1046900	939240	995750	900350	925190	874640	837870	915710	857600	964240	832290
MWSHY0171	579.15	409.09	578.142	C30H26O12	[M+H]+	Procyanidin B2	Tannins	Proanthocyanidins	29106-49-8	1	14915000	14562000	12985000	16469000	17231000	14864000	17167000	15344000	15529000	15935000	17583000	14626000	11585000	11076000	10465000	9607800	10824000	9802000	8748900	10963000	12527000	10675000	10519000	8183600	9443500	8586700	9250500	10483000	9981100	10062000	11255000	9552500	10355000	8757400	8083100	10265000	10765000	13180000	11599000
pme0436	577.14	407.1	578.142	C30H26O12	[M-H]-	Procyanidin B3	Tannins	Proanthocyanidins	23567-23-9	1	1043000	719120	866070	1115500	869730	920380	1539600	1333400	1172300	1639200	1444100	1384600	1902600	1177100	1339500	1663700	2106900	1963800	2363300	2207200	2298700	1936400	2272500	1959800	1111000	811720	956830	1612400	1905500	1710900	1844500	1782700	1690300	2150900	1752500	2115400	1546100	1515100	1192100
pmn001667	577.14	407.1	578.142	C30H26O12	[M-H]-	Procyanidin B4	Tannins	Proanthocyanidins	29106-51-2	1	1488400	895030	1168400	1331400	1092300	1296000	1419600	1310900	1166100	1975900	1823800	1924100	1104500	968820	1043200	907740	977520	1019400	1126400	1381100	940030	953710	979360	1128300	770960	737300	938210	1164400	929690	983860	1089600	902290	1208200	1131800	996610	1265900	876660	1069500	926000
HJN074	591.15	289.07	592.158	C31H28O12	[M-H]-	Procyanidin A6	Tannins	Proanthocyanidins	-	3	32826	39003	46961	99594	92031	95524	89616	99558	91157	40102	38027	48235	34979	19155	25805	55115	61953	70172	49650	45382	39014	24674	58592	26741	33967	31537	20514	49566	57223	45167	52073	51914	57452	50749	25830	28022	27635	39355	46823
mws1294	717.14	579.1	716.138	C36H28O16	[M+H]+	Theaflavin-3-gallate	Tannins	Proanthocyanidins	30462-34-1	1	150600	123720	117570	210440	195910	183920	204830	134800	183370	187130	219370	161350	113900	149910	119570	163070	175680	196320	160310	153640	192870	183600	245580	229890	94800	54913	83765	112830	126850	122050	175270	172200	148910	134930	127470	127430	114980	149330	90966
mws1295	717.14	579.11	716.138	C36H28O16	[M+H]+	Theaflavin-3'-Gallate	Tannins	Proanthocyanidins	28543-07-9	1	266650	192020	207870	342850	270110	297490	287680	230080	323090	296930	275510	248870	196280	207580	199880	263320	271750	398280	273570	250400	279000	315280	357320	358830	102550	70508	116040	172210	202520	216480	291200	254810	241510	195080	167380	183820	214800	236400	210270
HJN094	729.15	407.07	730.153	C37H30O16	[M-H]-	Galloylprocyanidin B4	Tannins	Proanthocyanidins	-	2	10505000	18932000	15322000	17171000	15999000	15829000	17377000	14287000	15868000	21329000	20814000	23008000	10992000	11421000	10381000	7772400	7057000	9827800	10218000	11329000	10156000	11007000	9269800	10865000	6205500	6883700	7370100	9186700	10088000	8237300	8382500	7689900	9725500	10836000	9963000	11968000	12437000	12087000	12620000
pmn001647	865.2	713.2	866.206	C45H38O18	[M-H]-	Procyanidin C2	Tannins	Proanthocyanidins	37064-31-6	1	769770	1028600	987780	951790	720970	774480	558880	833980	656250	974330	823480	829710	602830	475130	620440	467220	469920	519170	463030	719030	413580	457490	515210	556260	560880	485200	578510	332370	574550	313640	243740	341130	393620	528620	565140	600080	547910	433020	615140
pmn001646	865.2	577.1	866.206	C45H38O18	[M-H]-	Procyanidin C1	Tannins	Proanthocyanidins	37064-30-5	1	1472000	1746200	2029900	1833500	1751000	1424900	1784700	1573000	1424000	1725300	1450100	1554300	1082200	917400	869820	606990	944310	856980	1136600	816320	704700	761840	846310	835650	977180	804330	976360	588500	968730	809990	516970	570400	920380	993770	914210	966890	1223800	928740	1014900
Lmcp005197	869.16	139.04	868.149	C43H32O20	[M+H]+	Theaflavin-3,3'-di-O-gallate	Tannins	Proanthocyanidins	30462-35-2	2	76134	68219	62347	52060	42875	39722	37840	24850	38119	70678	92318	82430	79288	37038	47368	48078	67038	95953	38410	56306	69634	135160	75043	98909	21787	20699	24759	14272	18814	15102	40418	17981	18402	15790	25123	18695	46649	44099	40626
Lmpp003705	1019.22	731.16	1018.22	C52H42O22	[M+H]+	Procyanidin C1 3'-O-gallate	Tannins	Proanthocyanidins	-	2	70782	92502	90276	59811	48072	29830	62800	22391	61140	142110	144690	143630	79989	58858	28952	29064	39086	39006	45768	47525	39729	26660	61932	41979	7875	43713	19903	32876	62162	41588	45611	23324	28175	96512	92636	89457	67112	59619	47497
HJAP144	1019.22	731.16	1018.22	C52H42O22	[M+H]+	Galloylprocyanidin C2	Tannins	Proanthocyanidins	-	2	18804	23711	6107.2	13869	13762	16035	11888	11622	13082	14530	19590	8356.5	18100	14503	16054	6251.2	9121.2	7583.5	6211.8	12956	8464	4943.8	10392	8871	5537	4797.2	6890.5	9162.8	7706.5	4175.8	7672	6235.8	10476	8958	10134	17352	9437.2	8263	10361
Lmgn000188	89.02	59.01	90.032	C3H6O3	[M-H]-	D-Lactic Acid	Organic acids	Organic acids	10326-41-7	3	30025	16347	11839	5635.5	11490	10669	11814	11670	11176	12241	7320	16493	16065	36470	22700	28198	17492	18920	24863	25371	26734	32289	29665	26442	17135	24023	26688	14889	20450	19825	17690	36806	20932	26972	32038	18934	9784	14151	11085
pme2601	89	59	90.032	C3H6O3	[M-H]-	3-Hydroxypropanoic acid	Organic acids	Organic acids	503-66-2	3	89550	35317	57609	37491	31443	35248	40979	53116	48412	34128	24147	31475	50671	72108	41934	71466	71189	43449	65435	41917	53589	30095	52970	47504	60767	55711	41039	37009	50289	38214	67354	57255	49297	38249	53459	58076	27334	55169	48727
MWS2040	94.98	79.96	95.988	CH4O3S	[M-H]-	Methanesulfonic acid	Organic acids	Organic acids	75-75-2	3	64703	69188	46406	97132	88146	86867	93058	113780	92064	63556	140240	144650	97100	59548	94939	86300	132420	81198	119400	134710	96926	109860	112480	119470	78230	42176	76514	72242	61376	103620	54704	64417	66639	56195	63022	61267	73061	93188	111040
Lmqp000873	101.02	55.02	100.018	C4H4O3	[M+H]+	Succinic anhydride	Organic acids	Organic acids	108-30-5	3	505270	675410	658430	506050	437740	384740	520460	484000	476880	643360	566520	535230	745210	846710	538270	1034500	711890	758840	885610	952880	717440	721680	596130	798510	1043500	1139300	969900	1042600	933750	813140	848280	971520	786040	1027400	1022100	920950	820620	731650	676390
mws4052	102.06	56.05	101.048	C4H7NO2	[M+H]+	1-Aminocyclopropane-1-carboxylic acid	Organic acids	Organic acids	22059-21-8	3	674820	842700	683350	845010	739550	623940	750140	533700	615070	664450	743060	784600	653310	586690	568990	563360	624280	554540	628200	559300	630450	509800	524110	512600	641290	722890	593860	693000	756060	553720	660510	719370	693770	647400	735080	709170	816030	718810	615910
pme3017	104.07	58	103.063	C4H9NO2	[M+H]+	2-Aminoisobutyric acid	Organic acids	Organic acids	62-57-7	2	13915000	14030000	13789000	14304000	13294000	13854000	14397000	13538000	13167000	12004000	12493000	12262000	12371000	12534000	11441000	11507000	11902000	11764000	12235000	12477000	11926000	12023000	12612000	11348000	9218900	9438300	9410600	10043000	11500000	12275000	9527900	10751000	10490000	7924300	8478400	8946500	10014000	11776000	11284000
pme3011	104.07	68.8	103.063	C4H9NO2	[M+H]+	γ-Aminobutyric acid	Organic acids	Organic acids	56-12-2	3	1196700	1972700	2306100	1117400	1152200	1249900	1230200	1187500	1376900	850160	863950	1077200	490680	421550	555760	379580	282720	321640	463410	417710	515820	504260	799080	442190	1334300	923020	1173300	218070	153870	208940	279210	121940	368120	205050	147320	253940	863890	821380	800410
Lmbn000193	103	59.01	104.011	C3H4O4	[M-H]-	Tartronate semialdehyde	Organic acids	Organic acids	2480-77-5	3	66331	57325	59319	96546	87424	83470	89962	59125	70385	93983	83632	86369	85140	81482	92914	174300	140920	159850	184780	187020	150270	157370	150100	182490	114310	152020	96168	115340	95638	100250	124290	116490	116700	164780	129720	141720	88848	82129	100340
ML10172161	103	59.01	104.011	C3H4O4	[M-H]-	Hydroxypyruvic acid	Organic acids	Organic acids	1113-60-6	3	60758	55642	80847	70114	84708	75400	70735	73138	72994	72073	80308	87214	132810	123240	102990	186280	139560	189670	152610	142820	168640	167140	138540	148360	128810	144690	117270	122810	129200	91108	150000	104310	91680	181730	152680	158910	111450	101860	110100
mws0576	103.04	59.1	104.047	C4H8O3	[M-H]-	3-Hydroxybutyric acid	Organic acids	Organic acids	300-85-6	3	560800	494790	605560	648100	636940	650790	578120	501280	633310	680360	654620	714090	824170	779260	831440	1325700	1074900	1288700	1236800	1053400	1195400	1229300	1235000	1145600	1252900	1122300	1178200	1044600	1012700	1000700	1008600	1069600	1065000	1393800	1193600	1206600	792130	866050	1132500
mws0206	103.04	57.03	104.047	C4H8O3	[M-H]-	2-Hydroxybutyric Acid	Organic acids	Organic acids	3347-90-8	3	27350	31979	56484	40774	35195	45664	29195	31237	63825	24921	20769	36359	71058	24776	29793	40897	17802	32740	27814	32337	46842	43724	34032	69664	42164	68948	31192	30152	28657	20101	69177	22993	45089	14104	16441	27778	33407	42798	48017
pme1975	103	59	104.06	C3H4O4	[M-H]-	Malonic acid	Organic acids	Organic acids	141-82-2	3	521240	380360	518500	669260	621390	557040	492440	438710	469170	536510	598130	641880	766080	686710	685950	1175600	921590	1243200	1051800	902570	862980	1028900	1077900	928540	924730	998160	969670	1054900	773720	882350	914910	991570	792900	1162000	1172400	1188400	698080	666100	1001000
pme0048	108.01	64	109.02	C2H7NO2S	[M-H]-	2-Aminoethanesulfinic acid	Organic acids	Organic acids	300-84-5	3	10947	14423	8809.6	24775	19664	21441	29687	15423	25738	14831	20170	17233	9487.2	8398.3	10026	13208	16015	17937	16636	16155	11696	9412.4	12370	9930.3	9318.8	8822	12162	15314	6008.7	17777	4012.5	6691.4	12731	4315	3225.4	553.41	9334.7	4338.6	4418.8
mws0376	115	71	116.011	C4H4O4	[M-H]-	Fumaric acid	Organic acids	Organic acids	110-17-8	1	82113	105300	117090	134940	125800	84734	88253	98923	152770	162010	155500	167980	118790	92601	163070	116380	49886	92061	95017	146060	125120	175980	119820	130220	171240	237280	223930	308140	261330	232090	127040	235890	282530	235920	285910	250930	102300	191660	243190
pme0275	115.05	97	116.047	C5H8O3	[M-H]-	4-Oxopentanoic Acid	Organic acids	Organic acids	123-76-2	3	14462	8351.3	12829	10139	14245	14322	7265.9	7304.9	8534.6	12873	11455	9024.2	13490	16848	16943	21143	17382	13287	12462	18949	15013	19823	16476	14287	12764	16672	11728	9380.9	14386	16059	8605.2	15922	12515	11607	13168	10458	15366	13997	13852
mws0823	115.04	71	116.047	C5H8O3	[M-H]-	3-Methyl-2-Oxobutanoic acid	Organic acids	Organic acids	759-05-7	3	76559	45759	43724	56924	61552	64648	54513	67529	61420	86550	87746	60348	83877	73475	96450	87804	86668	115610	80246	120980	93873	126870	107820	100850	87738	82755	83493	64270	101760	81686	95822	74720	77724	89393	71723	65953	66698	64629	73598
mws0192	117.02	73	118.027	C4H6O4	[M-H]-	Succinic acid	Organic acids	Organic acids	110-15-6	1	24679000	22048000	24959000	13604000	16701000	18116000	23684000	21013000	18463000	24965000	24789000	18505000	29763000	35310000	25374000	27306000	36206000	31397000	31376000	36340000	34702000	27772000	23640000	28357000	39728000	32963000	43587000	38569000	29262000	34290000	27006000	36000000	40180000	36147000	35727000	34813000	27497000	29038000	29083000
pme1730	117	59	118.027	C4H6O4	[M-H]-	D-Erythronolactone	Organic acids	Organic acids	15667-21-7	3	1504000	842500	1013600	770130	905570	751710	749790	842840	883180	792790	684200	912560	1156200	1595900	1462900	1641200	1503200	1304500	1494200	1421000	1542200	1560700	1408700	1697700	1231800	1609500	1569600	1258900	1299200	1240100	1688600	1331700	1181500	1412000	1404200	1558900	992490	1020100	1312000
mws0470	117.02	73	118.027	C4H6O4	[M-H]-	Methylmalonic acid	Organic acids	Organic acids	516-05-2	2	22722000	21525000	25548000	11471000	16679000	19506000	19016000	21367000	18392000	25195000	22579000	16578000	25746000	31958000	23963000	28321000	29083000	32567000	29581000	32796000	34376000	25770000	21041000	25630000	42841000	35985000	34008000	34432000	27245000	30072000	21955000	35619000	38931000	34362000	38928000	30890000	24763000	28609000	28514000
mws0147	117.06	59	118.063	C5H10O3	[M-H]-	β-Hydroxyisovaleric acid	Organic acids	Organic acids	625-08-1	3	341650	392920	453790	642330	568070	622310	665730	650370	668680	279010	335230	382100	521950	480840	647380	1072400	1185500	1086500	1047600	839680	1081300	761520	773410	590730	276740	240660	302340	514780	451700	458750	374840	409550	389960	251530	208210	249650	412430	467200	488430
pme3096	118	74	119.022	C3H5NO4	[M-H]-	Aminomalonic acid	Organic acids	Organic acids	1068-84-4	3	1011100	924120	974930	545610	648110	772660	682290	779470	765700	1036300	851660	762080	1084700	1292200	875090	1159500	1403200	1194300	1363800	1374300	1368200	1173100	986490	1080600	1626900	1560500	1743800	1714100	1167700	1644700	1188800	1511900	1529000	1637900	1755200	1315800	1101500	1118800	1159700
pme1216	122.03	78	123.032	C6H5NO2	[M-H]-	2-Picolinic acid	Organic acids	Organic acids	98-98-6	3	182530	132820	149560	160860	138590	131070	161450	138680	125040	71845	80687	67222	258000	269270	182410	239020	296050	243140	234180	326440	507020	169450	329880	314210	172270	135870	137760	134680	129400	89926	105970	96785	140760	29266	17400	52107	147370	156440	168640
mws0236	124.01	80	125.015	C2H7NO3S	[M-H]-	2-Aminoethanesulfonic acid	Organic acids	Organic acids	107-35-7	3	25863	7928.5	13283	23241	16166	23559	28462	42572	21265	27542	27458	22386	13717	23111	21300	22081	12072	17886	14815	9720.9	9908.5	13744	16345	18203	18419	17305	17039	15406	20523	22722	25089	26588	15106	12643	16932	24065	25781	28819	24222
MWSmce536	125.02	79.02	126.032	C6H6O3	[M-H]-	Methyl 2-furoate	Organic acids	Organic acids	611-13-2	2	96628	70591	174980	126710	132900	79784	77170	86260	92848	147090	131920	173650	39208	24203	31955	21036	31690	28394	23494	19523	36838	25688	31074	26421	177680	314640	140270	154190	265040	85152	21087	105870	39562	72671	35177	69549	93497	81283	58876
MWSmce448	127.05	81.04	126.043	C5H6N2O2	[M+H]+	Imidazol-1-yl-acetic acid	Organic acids	Organic acids	22884-10-2	3	12652	32733	19685	26985	42225	8516	44682	32301	27131	25734	20943	11934	21195	42074	52467	25585	41438	34112	52902	38828	26861	44142	41845	30186	7520.8	17578	7085.4	30885	28560	33026	22103	29077	29830	24931	30208	19189	44917	19211	25835
MWS0811	130.09	84.08	129.079	C6H11NO2	[M+H]+	L-Pipecolic Acid	Organic acids	Organic acids	3105-95-1	2	6127000	5607500	5065000	7342700	8004900	5766200	6719800	7582000	3496500	6469500	4897500	5111800	5896100	7297500	5559900	8637300	10823000	9554400	10690000	8020000	9080800	7740000	9466500	7459000	6027500	5929000	6810600	16511000	17620000	18978000	13466000	11651000	11235000	4685500	4608900	5020700	7553100	7876700	8432400
Zmgn000217	129.02	85.03	130.027	C5H6O4	[M-H]-	Methylenesuccinic acid	Organic acids	Organic acids	97-65-4	1	63980	78344	92222	79546	86841	89622	88230	93859	98521	78781	103040	96997	70788	77262	93686	62087	77434	98576	105230	77914	74302	59161	81316	87651	90041	82333	81792	64515	72592	84347	79210	93162	78470	90734	68534	104110	77009	84192	82643
Zmpn000638	130.05	88.04	131.069	C4H9N3O2	[M-H]-	3-Guanidinopropionic acid	Organic acids	Organic acids	353-09-3	3	100920	63616	59881	88143	75704	67758	85537	93230	68293	133310	163950	127420	134130	107920	122440	139610	113320	122060	126530	133280	143350	111200	124700	140210	97565	102590	92747	120830	107410	116550	140940	109940	133410	142480	130610	131460	100470	119070	127350
ML10197929	130.09	88.04	131.069	C4H9N3O2	[M-H]-	Creatine	Organic acids	Organic acids	57-00-1	3	242980	104350	145450	238320	214340	165560	205420	186370	167820	418040	319890	373460	260190	387780	269990	278940	302270	281520	386230	314630	355890	350910	276980	296990	233030	156760	265480	282270	292330	249530	324130	305080	292290	406360	410690	400510	229400	244140	271220
pme0274	132.1	69	131.095	C6H13NO2	[M+H]+	6-Aminocaproic acid	Organic acids	Organic acids	60-32-2	2	2332200	1755500	2126100	1722000	2217700	1980100	1672600	1698300	1808600	2279800	2245500	1972400	749650	747700	882580	882660	1130400	1042200	993950	799660	960340	591140	705790	525600	704880	750700	620300	558470	538990	605480	634980	552030	615730	626140	561400	602570	915050	980910	1099000
mws1167	131	59.2	132.006	C4H4O5	[M-H]-	Oxaloacetic acid	Organic acids	Organic acids	328-42-7	3	59886	46909	57947	91635	118750	129820	97754	55649	88852	79059	76247	95732	152940	102750	94459	152240	183750	150150	262640	198650	136850	201990	94336	97858	61145	35789	52112	77708	136170	121680	112980	73568	108790	64194	43524	73033	98778	73106	84071
Lmbn001364	131.03	87.05	132.042	C5H8O4	[M-H]-	4-Hydroxy-2-Oxopentanoic Acid	Organic acids	Organic acids	3318-73-8	2	286030	279730	299140	324470	311500	294650	299550	299730	261640	215470	258160	235990	359720	397140	352510	490390	513810	530250	510260	373340	432520	383880	470960	414720	284080	277710	262340	529680	697280	610900	557660	570780	561030	360370	365200	422770	349700	367170	342160
pme0243	131.03	87.05	132.042	C5H8O4	[M-H]-	Glutaric acid	Organic acids	Organic acids	110-94-1	3	779550	698400	1064200	1746000	2027100	1809500	2282900	2185400	2154400	1270800	1352100	1280800	1949600	2433100	2085400	4850200	5229000	5137100	4076600	3794600	4329600	3725800	4318300	2810600	1249400	1075700	1134700	2418500	2129600	2262500	2122900	2017200	2052600	983210	860630	937800	2035100	2065200	2054000
MWSmce362	133.05	87.01	132.042	C5H8O4	[M+H]+	3-Ethoxy-3-oxopropanoic acid	Organic acids	Organic acids	1071-46-1	3	16784	19966	17362	8352.5	20548	11372	11058	22657	17832	7020	5869.5	14110	8104.2	10810	12374	8664.5	3231	6450.8	1622	2686.2	6997.8	6035.7	6863.4	10466	28111	31531	21547	49350	35633	50422	37764	42093	40531	30259	28764	35638	33197	22116	22630
pme3034	131.03	69.03	132.042	C5H8O4	[M-H]-	Ethylmalonic acid	Organic acids	Organic acids	601-75-2	3	30088	22166	36690	64362	61679	56148	77709	69309	68650	43573	41158	45799	72141	85941	70696	155030	173890	178930	144480	135770	156720	124280	161280	101670	45572	40657	50457	79731	67691	77112	72851	72188	71788	35704	28305	26812	75081	65610	67368
Lmmn002164	131.03	87.05	132.042	C5H8O4	[M-H]-	Monomethyl succinate	Organic acids	Organic acids	3878-55-5	1	325900	291500	280860	334170	297680	316660	312570	294810	286940	209230	247980	260680	375010	415810	363040	525760	513630	592680	471790	394020	461560	432230	488250	395760	340180	246760	269300	621050	772580	597530	617840	581260	609100	427910	328590	423820	365190	349020	351600
mws0473	131.03	87.05	132.042	C5H8O4	[M-H]-	2-Methylsuccinic acid	Organic acids	Organic acids	498-21-5	1	3128000	2822200	2770400	3627500	2975300	3027900	3222600	3226100	2707300	2384300	2644300	2370300	3475800	4090000	3475700	5132400	5490900	5387000	4576400	3891500	4328700	3974700	5032900	4125800	3115700	2558600	2648100	5802700	8310800	6383900	6028100	5498000	5837800	4121700	3609000	4160300	3757000	3739300	3763600
Lmbn001288	131.03	87.04	132.042	C5H8O4	[M-H]-	2-Hydroxy-2-methyl-3-oxobutanoic acid	Organic acids	Organic acids	71698-08-3	1	288540	268270	281730	375050	283260	315100	310540	273280	276000	238820	252000	249660	349820	381760	326020	468300	525130	562200	457600	383770	403280	349940	461300	392120	313520	236050	233780	593040	712520	559480	625490	546550	532500	362080	359890	397330	383860	359490	351400
Lmmn000806	131.03	87.05	132.042	C5H8O4	[M-H]-	Dimethylmalonic acid	Organic acids	Organic acids	595-46-0	1	263970	250730	267060	316440	240020	280500	267520	291680	252100	230530	213640	236890	322920	382250	303020	472020	523050	551680	468490	403280	455080	393200	432400	416000	283590	262970	223770	553400	794890	598490	608280	599910	538390	346670	348310	391450	344590	326520	336490
Lmgn000160	131.05	70.03	132.053	C4H8N2O3	[M-H]-	3-Ureidopropionic Acid	Organic acids	Organic acids	462-88-4	3	6563.9	7521.6	16299	21254	18419	15997	25723	19430	21579	9781.5	15129	11391	8669.9	6505	8330	24916	40793	44727	32762	13315	17484	12160	16290	10616	6462.7	7759.2	6042.5	17432	16275	21657	18663	13026	6525.4	4341.5	4906.6	6466	12997	10265	15792
mws0972	131.07	85	132.079	C6H12O3	[M-H]-	6-Hydroxyhexanoic acid	Organic acids	Organic acids	1191-25-9	3	31331	36126	43324	62556	36919	67850	63173	44498	46980	45767	48859	44424	59471	46407	57493	91994	110640	77935	132930	78899	92357	86435	116210	80616	45625	40962	49361	58868	43206	46167	53320	81749	64588	29416	47340	35242	64797	31358	60146
MWS1882	132.03	88.04	133.038	C4H7NO4	[M-H]-	Iminodiacetic acid	Organic acids	Organic acids	142-73-4	1	1410400	1173200	1537800	1914300	1987200	2210700	1862100	2207100	2022000	1458300	1960100	1975800	689390	566620	908340	802490	1349100	1059200	1019600	763770	1068800	1101200	1311100	965570	771940	832060	654510	1050100	1356600	1253700	1278600	996590	831240	797890	704490	826840	954260	1043800	1073900
MWS1709	133.01	71.01	134.022	C4H6O5	[M-H]-	D-Malic acid	Organic acids	Organic acids	636-61-3	1	12799000	15671000	13764000	14138000	14739000	12391000	15228000	12190000	12684000	13292000	14004000	14487000	14026000	12469000	16153000	13502000	11081000	14441000	14147000	15788000	16947000	15199000	17695000	15932000	21401000	24627000	24528000	30763000	31142000	29662000	30816000	34527000	28806000	32207000	28868000	31017000	18769000	16816000	21954000
mws0275	133.01	71.01	134.022	C4H6O5	[M-H]-	L-Malic acid	Organic acids	Organic acids	97-67-6	1	768450	1040300	877420	859810	888160	774730	894710	703090	808020	911520	899930	925290	912240	724210	833950	796930	678510	895740	855670	1009700	968480	881330	1135400	1001200	1610400	1584800	1495600	1866600	1878000	1763900	1783400	2128300	1782800	2180500	1880000	2074700	1182500	1016700	1252300
pme3207	141.02	59	142.027	C6H6O4	[M-H]-	Muconic acid	Organic acids	Organic acids	1119-72-8	3	1467400	1642000	1260500	1258300	1325700	1431500	1179800	1301000	1328000	1309900	1575900	1274700	1583200	1385300	1582500	1325100	1237100	1344100	1277500	1429200	1304900	1320700	1103300	1307300	1219200	1330100	1308000	1385400	1632800	1645900	1440800	1479800	1759900	1302100	1484800	1261600	1283800	1439400	1512800
Lmgn003978	141.09	59.01	142.099	C8H14O2	[M-H]-	2-n-Propyl-2-pentenoic acid	Organic acids	Organic acids	60218-41-9	3	375060	415240	196850	198170	160350	170620	194440	190170	192270	409300	501420	517720	267550	329200	185970	99924	88279	94001	138000	159370	168330	144830	166570	165690	283910	308900	313980	203740	215100	132790	133460	214120	207520	226220	236920	260580	133530	140980	259470
Rfmb320	144.1	84.08	143.095	C7H13NO2	[M+H]+	1-Methylpiperidine-2-carboxylic acid	Organic acids	Organic acids	7730-87-2	3	1080400	772710	825330	728000	643140	665480	635090	666280	646560	890660	669150	649720	1204800	1180400	1361600	927890	768350	980740	888590	846610	822440	1077800	867180	890640	1313000	1198800	1413700	806140	1180700	983490	963010	1015500	959380	1171900	1092000	1101900	804990	805870	763650
mws0851	143.11	143.11	144.115	C8H16O2	[M-H]-	Valproic Acid	Organic acids	Organic acids	99-66-1	3	844020	965340	907820	881400	837180	785970	900640	849160	833470	1123500	1049400	1155700	925300	948420	780430	814210	811800	782740	766330	651510	751260	726360	797870	699350	804680	838920	889650	739910	727210	841160	725490	786800	707130	607410	623290	694920	840690	732330	802800
pme0295	146.08	86	145.074	C6H11NO3	[M+H]+	4-Acetamidobutyric acid	Organic acids	Organic acids	3025-96-5	2	2003500	1106200	957730	667200	976650	612420	550830	974140	521830	1592000	1327300	1266400	3078500	5515100	3092400	2400700	2510700	2166700	2182300	1968900	2396800	3189100	2485900	4410700	2337500	2678100	2393300	1650900	1971100	1511500	1392800	1500800	1209600	2896200	3918700	3304400	2584500	2131500	2124200
mws0567	146.09	87	145.085	C5H11N3O2	[M+H]+	4-Guanidinobutyric acid	Organic acids	Organic acids	463-00-3	3	1697300	3878700	5786700	3627600	4047100	2845500	3452900	7786700	5284800	3388400	2826400	4863400	3487500	3037000	3764800	8162700	14029000	7201100	9732200	4739600	5529400	4781000	7132900	6314800	3374700	4119800	3774900	4682600	4612200	6762100	4244900	7561800	6116300	2149200	1949700	2984300	5710200	5178400	5539700
pme2380	145.01	101	146.022	C5H6O5	[M-H]-	α-Ketoglutaric acid	Organic acids	Organic acids	328-50-7	3	103250	107640	85815	154190	109150	162460	124260	100240	99880	114320	101420	141200	108250	156990	128950	108510	87247	130240	124050	122090	88466	116550	100000	108510	94598	65625	116800	169420	143190	134050	115930	101970	146840	133740	94112	97261	92838	80536	82019
Wmzn000227	145.06	109.04	146.058	C6H10O4	[M-H]-	2,2-Dimethylsuccinic acid	Organic acids	Organic acids	597-43-3	1	122990	137010	190160	341050	270300	357080	376040	381670	399250	159770	210910	238600	79722	50819	79137	175320	197480	165070	192340	172350	186060	108740	194080	124200	120360	112790	109910	196840	233000	247250	197940	132440	163610	85434	83249	101590	144500	173270	174720
mws0924	145.05	101	146.058	C6H10O4	[M-H]-	2-Methylglutaric acid	Organic acids	Organic acids	617-62-9	3	276910	301390	333670	346710	343660	327100	345590	387350	389740	330280	292680	304770	849330	847880	877590	813070	913440	997130	693470	715610	748070	821790	740300	648640	343230	293420	444180	313160	365720	455440	277110	283290	286760	356290	235350	323210	457210	415200	424700
Lmbn001609	145.05	83.05	146.058	C6H10O4	[M-H]-	2-Acetyl-2-Hydroxybutanoic Acid	Organic acids	Organic acids	-	3	15785	21346	43049	14383	22435	24742	12273	19826	19583	30303	14784	29336	108760	85105	101090	91556	69568	108050	41143	86106	63720	74086	65722	77078	19725	25100	25172	6784	21452	12029	9390.2	20231	12456	10805	17380	17164	30516	31572	39765
Lmbn001676	145.05	101.06	146.058	C6H10O4	[M-H]-	3-Hydroxy-3-Methyl-2-Oxopentanoic Acid	Organic acids	Organic acids	-	3	11200	8451	8288.5	16566	9458.2	16568	8770.1	14716	8823.2	8389.2	17940	7075.1	13169	19484	15081	25409	16834	15812	21159	25817	9494.8	9448.8	14772	16452	7174.3	6583.5	7273.9	12981	5270.2	7056.8	2337	6888.8	19630	4695.5	8252	4372.8	8905.8	10630	11133
mws0208	145.05	101	146.058	C6H10O4	[M-H]-	Adipic Acid	Organic acids	Organic acids	124-04-9	3	330960	423410	467680	445440	464400	427390	403000	507350	472210	367070	363130	343510	1037700	970230	1036700	971760	1227400	1185200	916760	864520	957230	980500	884150	798700	382490	423420	493430	420190	458390	486650	394360	423260	394150	361900	332650	365030	517840	603050	564480
MWS3036	147.03	85.03	148.037	C5H8O5	[M-H]-	3-Hydroxyglutaric acid	Organic acids	Organic acids	638-18-6	3	248470	178620	223030	154550	164820	142940	184340	172610	127860	160290	175050	163260	241550	252480	293820	219930	206070	317360	211500	247710	312000	200780	301300	181010	231440	263710	230420	282900	253480	263700	271670	283610	296120	201090	229950	240550	228000	102920	188700
Zmyn000247	147.03	57.03	148.037	C5H8O5	[M-H]-	2-Hydroxyglutaric Acid	Organic acids	Organic acids	13095-48-2	1	692200	522680	622590	528910	616960	546530	620730	670390	495960	552420	556950	617570	850530	625950	816740	794900	751800	849040	775490	840320	700640	711880	834670	831720	888640	715010	577510	865670	786030	810610	759610	853480	839870	733700	582470	795940	629540	540290	631520
Lmbn000216	147.03	57.03	148.037	C5H8O5	[M-H]-	3-Methylmalic acid	Organic acids	Organic acids	152204-30-3	1	724240	529760	640500	615190	685450	598920	684130	720500	626640	592290	581020	643770	796300	735140	843120	862150	729850	981290	867540	775830	938720	705000	984170	675270	967470	771800	725530	927850	885870	797830	660830	827070	975130	646230	710410	845050	575980	548750	754690
pmb2826	147.03	87.1	148.037	C5H8O5	[M-H]-	L-Citramalic acid	Organic acids	Organic acids	6236-09-5	1	1381800	1146500	1299900	1207600	1170500	1062100	1108200	1337500	1198800	999700	1049600	1009200	1564100	1370400	1669300	1603700	1413900	1698800	1656900	1537200	1419000	1133700	1638800	1487600	1798800	1340800	1204300	1414100	1444500	1498400	1032200	1552900	1531700	1121700	1217900	1265600	1302200	1168900	1463300
mws0262	149.01	87	150.016	C4H6O6	[M-H]-	L-Tartaric acid	Organic acids	Organic acids	87-69-4	3	88483	77344	60728	103840	92252	87453	61251	84032	64294	78374	99402	76581	47467	82300	66432	35464	94272	90273	77578	97594	87122	54933	52771	60289	49814	36676	64325	84397	73982	51862	6294.7	76406	74471	67950	68734	21309	74128	61043	55198
pmf0420	149.06	74.9	150.068	C9H10O2	[M-H]-	Benzyl acetate	Organic acids	Organic acids	140-11-4	3	739420	540590	622010	542070	609740	445220	498280	522900	483760	503990	518810	569390	505330	532250	605720	493820	507760	622330	645900	582910	642320	610170	656540	665540	618510	629760	694760	551110	626550	590980	630010	558370	551040	596990	620120	629520	259210	245980	291760
Zmgn004894	151.04	136.02	152.047	C8H8O3	[M-H]-	Methyl 4-hydroxybenzoate	Organic acids	Organic acids	99-76-3	3	19186	11153	12840	17852	19401	40381	32979	27735	34108	9233	16388	34895	19926	20885	13599	37647	19240	22729	32089	29202	26458	25586	25814	16883	42062	36050	29668	36124	44806	52306	42820	36838	41276	32904	35052	50640	34828	17437	24143
MWS1962	153.13	83.05	152.12	C10H16O	[M+H]+	cis-Citral	Organic acids	Organic acids	5392-40-5	3	9273.4	7701.7	10614	8872.2	4082.7	5455.4	11346	6728.9	6238.3	6713.3	14541	11091	6158.7	7756.3	8837.8	7832.1	8135.5	9114.7	11448	9794.6	10979	4329.8	8839.7	7028.1	8743.2	5484	7342.3	8259.4	9987.9	11544	12237	7443.6	12623	4972.4	14984	13504	5741	12326	10574
MWS1837	158.12	95.09	157.11	C8H15NO2	[M+H]+	TranexamicAcid	Organic acids	Organic acids	1197-18-8	2	347920	497200	498680	482400	491390	515000	492300	522590	466440	507950	501060	483720	512260	450020	358530	501010	419570	419760	532540	497710	423550	516830	490260	443270	371900	416950	397520	391680	493730	517450	331920	482980	417560	472880	449260	377810	399460	422190	470420
Lmbn001467	158.08	116.07	159.09	C7H13NO3	[M-H]-	5-Acetamidopentanoic Acid	Organic acids	Organic acids	1072-10-2	3	452560	352490	359110	226480	282780	222850	248220	254640	264690	306900	318360	319180	787460	894300	1001900	620230	860650	761400	737800	640320	610150	613800	728550	544520	348880	306870	374960	332380	263160	296260	305570	278120	277690	304610	354250	379970	454650	444360	440050
MWS3144	158.12	140.11	159.126	C8H17NO2	[M-H]-	8-Aminooctanoic Acid	Organic acids	Organic acids	1002-57-9	3	7086.2	8031.4	9137.5	4266.7	5185.7	2409.1	6583.1	4706.5	2499.1	3336.4	4771.3	4268.4	34528	34073	31701	16615	30937	28198	19737	11944	12182	19382	23880	11695	30058	19950	34184	13455	10693	17613	14058	20883	15012	10984	9326.2	7003.4	13298	11081	15802
Lmbn002072	159.07	97.07	160.074	C7H12O4	[M-H]-	2-Propylsuccinic acid	Organic acids	Organic acids	618-57-5	3	11569	5519.8	16377	10916	12166	14580	10970	11576	8251.8	16465	18331	17062	21827	23153	21714	17643	17019	14616	17080	9740.8	14340	24005	10099	20688	10358	23799	17204	3065.8	8509.5	8554	9723.2	9176.5	11068	14642	11511	15222	12742	25017	9151.8
Zmjn001813	159.07	97.06	160.074	C7H12O4	[M-H]-	Pimelic acid	Organic acids	Organic acids	111-16-0	3	13936	23032	8589	22585	7865.5	10980	15848	9141.8	12852	16491	17748	23133	31638	29841	28144	16454	21022	31971	17672	18192	22484	23173	13369	12686	15805	26722	8097.5	7944	8415	13012	12801	13782	15281	14308	20628	21259	19449	12789	13371
pme2761	161	73	162.016	C5H6O6	[M-H]-	4-Hydroxy-2-oxoglutaric acid	Organic acids	Organic acids	1187-99-1	3	216520	85109	95533	50753	113670	123240	59440	76255	87351	82921	107050	139070	112070	119770	124490	182450	136890	95306	158240	115770	151110	126440	116390	138420	99099	57432	86278	104550	88217	98300	54530	77273	79210	125130	102190	136350	110060	67327	106620
MWS5238	165.09	91.05	164.084	C10H12O2	[M+H]+	4-Phenylbutyric acid	Organic acids	Organic acids	1821-12-1	3	455840	376500	419340	96942	197210	146910	181640	145190	169460	484140	264280	382190	516660	526260	869830	331250	221090	303730	296740	723160	443460	490090	329950	730740	304050	415950	615220	86495	94759	88440	85018	120750	82293	477330	478780	428000	379270	354680	371680
mws2125	166.98	78.7	167.982	C3H5O6P	[M-H]-	Phosphoenolpyruvate	Organic acids	Organic acids	138-08-9	3	217070	127620	144080	161720	200160	224060	166160	183530	168980	189610	170350	221400	168130	219870	135680	250190	321360	249230	278940	272590	243330	256530	235050	339120	358720	430040	233400	747810	737380	688080	501080	784530	482690	534180	448340	442810	283850	264500	366440
pme3186	169	79	169.998	C3H7O6P	[M-H]-	DL-Glyceraldehyde-3-phosphate	Organic acids	Organic acids	591-59-3	3	108710	122900	89202	59008	72479	112410	74214	97526	96092	104580	115000	90068	78061	87390	73715	66514	88031	98219	130920	116670	65625	93185	90051	65060	133980	37607	69452	66425	90506	123430	22895	100010	119150	87130	132020	108240	122140	73912	92997
ML10176345	171.03	109.03	172.037	C7H8O5	[M-H]-	3-Dehydroshikimic acid	Organic acids	Organic acids	2922-42-1	3	321710	236000	212430	267800	269500	268990	190140	178800	222790	154050	208640	238400	412110	430590	394280	217550	259120	293400	248990	275880	295680	387540	366770	244760	173610	222970	231490	229230	215330	195480	242460	250870	200750	174830	221160	242550	239210	225140	330780
pme2550	173.02	137	174.016	C6H6O6	[M-H]-	Cis-Aconitic acid	Organic acids	Organic acids	585-84-2	3	1059200	705950	625000	552680	553180	489130	581100	502270	541680	497450	536430	537260	937690	944560	1090500	701760	613930	612180	617680	596580	732510	822680	779660	727360	662890	630340	806320	467100	555740	371930	619410	417090	443860	676040	606570	566170	543810	502740	591260
mws0154	173.05	93	174.053	C7H10O5	[M-H]-	Shikimic acid	Organic acids	Organic acids	138-59-0	3	2267000	1651000	1363700	1019800	1106900	1005500	1157200	906810	1027100	1014000	1099500	1213000	2179200	2521300	2829800	1489100	1240900	1440800	1297500	1392400	1591500	1894100	1525800	1836100	1707900	1785600	1952500	1169200	1045400	1032300	1289900	1044200	1233500	1555900	1227100	1319500	1261300	1210600	1299400
Lmgn002091	173.05	93.03	174.053	C7H10O5	[M-H]-	2-Methyl-3-oxoadipic acid	Organic acids	Organic acids	-	1	400270	386510	413530	388310	402460	494710	460140	479390	389770	391060	300210	352110	403060	436580	465850	525660	540530	378340	424700	324120	368420	411030	388190	365240	247020	280910	238540	191350	326190	333040	280860	231900	271130	241820	337890	415400	301260	373700	308720
Zmgn001448	175.06	115.04	176.068	C7H12O5	[M-H]-	2-Propylmalic Acid*	Organic acids	Organic acids	-	1	7224000	7867700	9616800	11845000	12046000	12622000	12736000	13201000	12335000	7461000	7853500	6714000	11156000	10139000	12814000	24019000	26655000	24987000	25901000	18438000	25930000	22780000	21994000	21114000	8947300	7668700	11951000	13639000	11220000	9763700	12758000	13310000	14361000	9501000	10672000	10533000	13360000	13028000	10632000
pmb3101	175.06	115	176.068	C7H12O5	[M-H]-	2-Isopropylmalic Acid	Organic acids	Organic acids	49601-06-1	2	8583400	9595400	11937000	14769000	14336000	13771000	15443000	15884000	13856000	8300600	9318900	7423300	12816000	12493000	15127000	27931000	27668000	29886000	28102000	20818000	27084000	23260000	30127000	24418000	12279000	9164800	13483000	17364000	13558000	10884000	15507000	14899000	17826000	10807000	12027000	11828000	14267000	14139000	15303000
Lmbn001754	175.06	115.04	176.068	C7H12O5	[M-H]-	3-Isopropylmalic Acid*	Organic acids	Organic acids	921-28-8	1	8743600	8757300	11273000	14028000	12893000	14675000	15240000	12935000	12505000	8592700	8726400	8407200	14147000	12157000	15594000	27906000	32634000	29594000	28515000	19996000	25304000	26113000	30114000	22704000	10834000	9263800	12357000	14557000	12590000	11983000	14010000	13981000	16750000	11325000	11722000	12779000	14632000	14178000	15087000
MWSmce220	177.04	59.02	178.048	C6H10O6	[M-H]-	D-Glucono-1,5-lactone	Organic acids	Organic acids	90-80-2	3	175590	130550	123730	66624	162020	160670	117830	148620	177270	184460	138520	145890	184010	226740	201590	132620	197690	176440	157560	147260	172370	144350	166110	126930	162670	186250	161240	154670	187180	186590	238770	233130	109700	202900	152910	166330	184720	118070	166610
Lmgn000242	177.04	113.02	178.048	C6H10O6	[M-H]-	4,5,6-Trihydroxy-2-oxohexanoic acid	Organic acids	Organic acids	56742-44-0	3	22667	6638.5	9277	10475	18043	4244.3	9970.8	12648	9081.5	23338	6473.8	19819	27444	20832	14944	18560	26960	20142	28190	13218	14936	20857	20286	18528	16382	14386	24812	9232	10096	9082	11767	8337	13878	18018	14143	7004	19100	12520	17858
mws0237	187.1	125	188.105	C9H16O4	[M-H]-	Azelaic acid	Organic acids	Organic acids	123-99-9	1	1259200	1238500	1361300	1425800	1378700	1486100	1396200	1184900	1316100	1336600	1357100	1356500	1448600	1292500	1638200	1276500	1294900	1385600	1167200	1363100	1213700	1140800	1142500	1223300	1260100	1222900	1068200	931150	1001400	957720	792790	956960	988330	959360	1164700	1035700	1242700	1249100	1209700
pme0278	191.1	128	190.095	C7H14N2O4	[M+H]+	2,6-Diaminooimelic acid	Organic acids	Organic acids	583-93-7	3	320730	515490	349700	675700	717380	590940	758110	687890	690110	436680	349070	410610	308810	320070	354990	441730	367430	313940	409960	326610	419910	314700	298150	325170	217630	345450	206400	345780	270340	286300	227290	356920	414300	191580	253540	233690	455420	466360	381110
Zmyn000453	191.02	111.01	192.027	C6H8O7	[M-H]-	Isocitric Acid	Organic acids	Organic acids	320-77-4	1	8065500	9257300	9224500	10431000	10083000	9315200	8063900	9002400	10627000	8968900	8886600	10075000	7487000	7423700	6045500	9639700	9421300	9574600	8940700	8259400	6731400	8535400	10703000	8440000	9790700	9218900	8123500	10939000	10490000	10296000	11130000	9901300	10585000	7329300	7888300	8248200	10240000	9270100	10863000
mws0281	191.02	111.01	192.027	C6H8O7	[M-H]-	Citric Acid	Organic acids	Organic acids	77-92-9	1	14698000	16934000	17369000	24249000	22638000	19302000	20663000	20072000	19505000	17142000	17155000	19768000	13405000	16836000	15370000	17522000	22362000	15810000	16910000	14324000	14223000	17936000	18941000	17548000	18180000	17895000	17092000	18059000	20245000	16816000	22028000	18290000	19378000	17577000	14529000	18525000	20148000	19486000	17932000
mws0277	191.06	85	192.063	C7H12O6	[M-H]-	Quinic Acid	Organic acids	Organic acids	77-95-2	1	15348000	14921000	15673000	7245900	7899000	9155600	10122000	11179000	6231400	7879600	7064800	5741900	12572000	11217000	8985000	9220800	13413000	14312000	10005000	15957000	14620000	11750000	14692000	6362700	13337000	6585300	10514000	10641000	10454000	13920000	5460200	10472000	10289000	7971800	11365000	6925400	14592000	8060800	9875900
Zmtn001464	204.03	160.04	205.038	C10H7NO4	[M-H]-	4,8-Dihydroxyquinoline-2-carboxylic acid	Organic acids	Organic acids	59-00-7	1	829630	708920	1092300	1486900	1293600	1565900	1562100	1353400	1641500	1325000	1306900	1295300	1321500	1057900	1564600	1908100	1834300	1870100	1856900	1842100	1816800	1639600	1370600	1211400	697250	795180	885520	1145100	804140	950440	730340	951610	801280	940010	855480	983410	1094300	1173400	1069400
mws0939	211.08	126.2	210.075	C8H10N4O3	[M+H]+	1,3,7-Trimethyluric acid	Organic acids	Organic acids	5415-44-1	2	26173	16910	23672	7315.8	14638	13508	13535	25308	23911	21984	13508	19738	21959	29836	45592	29258	23081	16336	17494	18011	19696	31809	43191	25293	15189	15799	12394	13819	24707	34970	44413	14628	15476	9285.8	9021.5	9003	33782	45578	25393
pme1654	209.12	59.02	210.126	C12H18O3	[M-H]-	Jasmonic acid	Organic acids	Organic acids	77026-92-7	3	347100	390470	613530	396650	405310	435110	423480	363330	447060	371330	496420	445130	3092600	2141400	2428100	1455400	2335700	3847300	1972600	2240900	2522000	3803700	3965700	2691000	532400	381220	820780	165590	195100	152860	247140	445440	258110	166660	150810	179490	1083900	1042100	1059000
pme0220	225.15	151.11	224.141	C13H20O3	[M+H]+	Methyl jasmonate	Organic acids	Organic acids	1211-29-6	3	106590	184680	148060	64169	73461	76752	59307	52788	78246	133980	173710	153060	314680	289940	240620	247080	391990	466300	239160	286020	359220	497040	402030	538470	24680	38324	43991	10436	14850	10213	14536	24657	9	9	9	9	161610	151420	138730
Lmtn004049	263.13	204.12	264.136	C15H20O4	[M-H]-	Abscisic acid	Organic acids	Organic acids	21293-29-8	1	1264700	817610	873800	742110	805330	912440	874780	705630	952800	882180	901970	922030	737050	627930	854840	769140	824020	899580	1007700	998740	945740	756040	931510	695880	1298300	1077800	1242700	1199300	1306200	1345600	1357800	1265100	1292400	1145900	1089400	1065700	781820	895740	899840
Lmmn003323	271.23	225.22	272.235	C16H32O3	[M-H]-	2-Hydroxyhexadecanoic acid	Organic acids	Organic acids	764-67-0	2	175850	205210	210300	309880	310730	287400	312570	302060	290900	231980	254420	234900	239250	256620	287820	291500	274160	435600	270330	225490	268290	218050	237610	229890	273830	332020	374560	322080	300500	321120	346920	321900	326840	220560	263820	203740	301580	275100	244590
MWSslk154	277.13	115.04	276.121	C12H20O7	[M+H]+	Triethyl citrate	Organic acids	Organic acids	77-93-0	3	13444	26060	22180	17087	14047	18166	18092	18951	22204	17115	20824	17704	16506	17587	27965	18150	19319	10574	17981	23672	24450	19338	24400	20945	16888	15852	18388	21908	14305	17793	17003	17376	14163	24359	18896	20591	13362	20163	14640
pmb2657	289.1	97.1	290.123	C10H18N4O6	[M-H]-	Argininosuccinic acid	Organic acids	Organic acids	2387-71-5	3	923240	790100	883310	778760	855120	949090	845770	785950	878040	615200	651160	767800	733580	775910	741140	940080	828730	991320	965880	882850	919890	954790	1014100	780160	597240	588760	668480	905650	788020	993190	1025900	847290	971340	614170	817990	595570	732230	762720	799760
Wmmn002441	183.03	124.02	184.11	C10H16O3	[M-H]-	(E)-Linalool-1-oic acid	Lipids	Free fatty acids	-	3	4928500	7035800	6814600	5401100	4772500	4572100	4285800	3712200	4787600	4294700	4609700	4523000	3316800	3975200	2639200	1159100	1830600	1352000	1468500	1351300	1277500	2006600	1594200	1416700	3435200	4154200	3321700	1584400	2077600	1888300	1820100	1669500	2632900	1362000	1578600	1179100	2880400	3430400	2821100
MWS1816	183.14	183.14	184.146	C11H20O2	[M-H]-	10-Undecenoic acid	Lipids	Free fatty acids	112-38-9	3	8997.5	13357	15056	7081.3	11101	9557.8	7547	10213	8722.5	11660	12144	6332	15677	9134.3	12103	14185	14581	11402	14604	12535	13158	10332	10452	10171	12652	14814	15182	9655.3	9182.8	16435	12813	10159	9687.1	14794	14786	12695	10762	11266	12438
mws0752	185.15	185.16	186.162	C11H22O2	[M-H]-	Undecylic Acid	Lipids	Free fatty acids	112-37-8	3	440790	420990	492640	540910	513350	464870	551200	488290	560620	561060	479150	492300	388340	304020	352060	342620	380590	419990	375960	351220	393250	429530	376320	358300	338620	436240	351860	424570	391790	441960	368960	384010	424580	400050	329820	364890	509570	455000	384680
pmb2640	199.17	199.17	200.178	C12H24O2	[M-H]-	Dodecanoic acid (Lauric acid)	Lipids	Free fatty acids	143-07-7	1	58048	62626	79684	94141	75469	72293	72130	86973	89983	89789	81096	82840	63648	64975	67050	70814	67481	73651	64876	60242	68966	60724	68446	72472	80972	84837	80074	75038	74255	86591	80450	70662	76289	70189	68514	67611	81734	70384	54273
MWS1900	215.13	153.13	216.136	C11H20O4	[M-H]-	Undecanedioic acid	Lipids	Free fatty acids	1852-04-6	3	29003	28310	25155	27116	29202	28106	28509	28263	29188	39416	38100	37472	20032	21649	19643	22773	23256	24476	22089	22487	17763	19475	27068	22113	39813	33042	38218	26000	32513	35568	29268	36685	32560	38334	35701	36047	29818	29690	27009
mws0119	227.2	227.2	228.209	C14H28O2	[M-H]-	Myristic Acid	Lipids	Free fatty acids	544-63-8	2	7001700	8866400	9345500	13357000	11450000	9964800	10109000	11048000	11934000	11105000	10560000	10585000	7334300	10112000	9235400	10282000	9443600	12096000	8034700	7621300	7751500	7361800	7760500	8351100	8036800	9046200	8348400	9368100	9822700	9746900	7660900	8932600	8674400	8225700	8585500	7400600	10102000	9993900	8078300
MWS0552	239.2	223.03	240.209	C15H28O2	[M-H]-	Cis-10-Pentadecenoic Acid(C15: 1)	Lipids	Free fatty acids	84743-29-3	2	202710	313740	261940	310920	287920	319170	353640	316250	332490	371010	298580	360890	265570	218310	184340	277850	214620	294480	356650	310320	291760	267260	270380	337030	397380	429080	448360	427490	436300	473820	477220	341240	315990	388600	306830	403650	843460	630850	575580
pme2827	239	223	240.245	C16H32O	[M-H]-	Palmitaldehyde	Lipids	Free fatty acids	629-80-1	3	5227000	8450300	7631700	9104600	8002500	7520000	8253400	7373600	7559700	10144000	10918000	11636000	7098800	6130200	4388900	7223700	8449200	8966700	9056500	8056800	8449100	6993200	6223100	7464700	7838900	9464700	7818600	7252000	6327700	6319300	5301400	5611600	6144500	8529300	8306400	7772300	3266800	3214000	3139300
MWS2430	241.22	241.21	242.225	C15H30O2	[M-H]-	13-methylmyristic acid	Lipids	Free fatty acids	2485-71-4	3	35594	53786	62764	75342	62417	43177	69925	65771	59888	73152	64132	57450	73739	83152	89257	90825	48957	142220	44583	51483	68621	45120	68375	59621	49468	57139	56445	50384	48671	49366	39671	49395	56837	42993	42573	43721	77737	70284	61172
mws0359	241.22	241.22	242.225	C15H30O2	[M-H]-	Pentadecanoic Acid	Lipids	Free fatty acids	1002-84-2	3	39438	43490	57854	76377	55257	39613	61341	56858	62812	63043	55298	62366	63552	79920	97262	89944	56772	127150	48834	41781	58177	44142	61542	58657	42984	48475	35240	66750	59273	53030	35508	51058	52062	40631	31702	40858	89276	72050	52734
MWS5231	243.16	181.16	244.167	C13H24O4	[M-H]-	Tridecanedioic acid	Lipids	Free fatty acids	505-52-2	1	53098	46487	37316	56566	49911	60711	56331	54261	62979	54703	53350	51048	26170	31346	22125	27866	27188	28695	30123	26673	40052	27483	45198	67802	74437	32919	32966	39055	40380	35232	36194	50710	34042	32974	37091	37043	43841	40043	41629
Lmcn009122	253.22	235.21	254.225	C16H30O2	[M-H]-	(7Z)-Hexadecenoic acid	Lipids	Free fatty acids	2416-19-5	2	2982.3	5196.2	4418.4	8606.8	6054.6	4841.6	7749.6	5837.9	5992.2	8009.2	4397.7	6401.8	11683	11216	16830	15091	6069.6	32800	7237.1	5846.3	9811.3	5990.1	10093	7238.3	3985.4	6614.8	5727.1	2805.2	4975.8	5581.7	4730.2	5151.1	5191.3	3512.2	3193.6	4697.5	9267	8631.7	7682.4
mws0361	253.22	235.19	254.225	C16H30O2	[M-H]-	Palmitoleic Acid	Lipids	Free fatty acids	373-49-9	2	6023.1	5498.7	7591.8	7848.5	6468.1	8182.3	9190.9	5475.6	6000.1	13642	6967	8250.4	13323	14239	19939	16191	4125.7	45269	7119.1	9942.6	11720	10273	12030	8891.7	4107.1	5223.9	5227.3	6451	7653.3	5481.4	4079.8	5832.7	7223.7	4214.1	4984	7789.6	11700	12891	7776.4
mws1488	255.23	237.22	256.24	C16H32O2	[M-H]-	Palmitic acid	Lipids	Free fatty acids	57-10-3	2	18579	25079	24751	35251	28461	21119	19820	26851	26367	24243	27421	22365	17235	23172	22339	22265	21142	17148	19318	22424	17222	16676	20565	16815	19455	17020	22019	22336	27989	19890	20847	24172	20375	21021	20009	22796	18281	14790	13980
MWSslk133	257.18	195.18	258.183	C14H26O4	[M-H]-	1,14-Tetradecanedioic Acid	Lipids	Free fatty acids	821-38-5	1	19608	15845	16077	16111	14041	13920	15582	14497	16583	16147	16089	18446	6546.1	8489.2	5822.8	4907.3	7940.9	5424.5	4652.2	7226.1	5567	5372	7124.1	7595.1	18504	11918	13116	11346	13664	12032	11183	10416	9326.2	11124	12166	11550	11862	13756	11637
mws0383	267.23	267.23	268.24	C17H32O2	[M-H]-	10-Heptadecenoic Acid	Lipids	Free fatty acids	29743-97-3	2	140140	252900	236680	340350	326060	144800	298460	289920	272000	305750	292270	239690	381520	337800	556840	451000	227900	726740	244540	262720	319210	263640	286880	246860	187790	200840	221880	191690	296260	132550	193970	196580	154590	145610	164900	211090	373060	318770	230650
pmf0293	269.29	209.2	270.292	C18H38O	[M-H]-	1-Octadecanol	Lipids	Free fatty acids	112-92-5	3	52096	94646	88059	85835	87795	92362	84922	81649	82523	86565	87759	93735	94537	90171	87427	90602	85001	77928	79742	74799	71118	69627	67692	67266	68399	59161	61463	57204	57505	57151	54877	54675	51833	53298	56824	57760	97122	84821	81184
Lmbn005923	277.22	59.01	278.225	C18H30O2	[M-H]-	Crepenynic acid	Lipids	Free fatty acids	2277-31-8	1	140390	115920	167100	251610	303960	200400	228170	214850	204320	182580	208000	189570	148300	142190	135350	185550	200910	193540	172430	179900	168500	165150	174860	184110	188290	162500	200410	196920	253690	225180	184010	149210	196640	174600	150860	174770	196290	192300	171010
mws0367	277.22	277.22	278.225	C18H30O2	[M-H]-	α-Linolenic Acid	Lipids	Free fatty acids	463-40-1	1	6674300	5104700	7493400	10923000	13088000	8486200	9685800	9964300	9300500	7872400	8768500	8441400	6439600	5841900	6277900	7905800	9578500	9153700	7883400	8176200	8275600	7493600	8093800	7691700	7978200	7288300	9209700	9440100	10786000	9837000	8563400	6554500	9662000	7914800	6650400	7650800	8417200	8033700	7421400
mws0366	277.22	277.22	278.225	C18H30O2	[M-H]-	γ-Linolenic Acid	Lipids	Free fatty acids	506-26-3	1	41713000	36543000	50478000	65439000	75858000	56202000	57809000	59107000	59830000	50249000	58619000	55331000	44230000	42412000	40057000	50725000	54815000	55014000	50539000	49254000	47580000	44037000	47169000	48219000	50838000	45503000	53479000	52035000	64624000	58529000	50431000	41165000	54958000	45334000	42673000	46355000	54734000	53757000	46346000
pmb1650	279.2	149.4	278.225	C18H30O2	[M+H]+	Octadeca-11E,13E,15Z-trienoic acid	Lipids	Free fatty acids	25575-00-2	3	11521000	6025200	6961500	7508500	7801400	9172800	7988400	7828400	8294600	8215000	7945500	7908600	8855100	9650100	9208800	9899300	9525800	9610000	9872900	10558000	10785000	10989000	10057000	11288000	12200000	11610000	11840000	13190000	11193000	13505000	14283000	12712000	12016000	14129000	11885000	12298000	4857700	7362700	8563700
pmb0889	279.23	95.1	278.225	C18H30O2	[M+H]+	Punicic acid (9Z,11E,13Z-octadecatrienoic acid)	Lipids	Free fatty acids	544-72-9	3	185080	204750	256840	349080	325440	298170	271470	231130	320920	206120	173020	218910	217070	196420	190500	274570	274720	386210	228750	293800	278310	251930	358330	244760	139660	106240	146570	131690	147610	174120	219700	108720	99608	153550	126170	127160	196610	212890	192340
mws1491	279.23	279.23	280.24	C18H32O2	[M-H]-	Linoleic acid	Lipids	Free fatty acids	60-33-3	3	10014000	10603000	16150000	23998000	26317000	10505000	19588000	15352000	18380000	12748000	15201000	14838000	13352000	11270000	11301000	15554000	16695000	12973000	13702000	11642000	11538000	10541000	13135000	14536000	12364000	10007000	14473000	18108000	21798000	19655000	14627000	12421000	16275000	12405000	8629000	12811000	24234000	21715000	14438000
Lmbn006152	279.23	59.01	280.24	C18H32O2	[M-H]-	(9Z,11E)-Octadecadienoic acid	Lipids	Free fatty acids	2540-56-9	1	4698	5365.3	9335.9	13010	13170	3904.7	10958	6503.4	11353	6210.7	5139.6	8695.5	5922.3	5062.4	7327	10395	8620.1	5916.5	9039.2	5116.6	7167.8	7619	9429.3	8130.6	7689.1	5944.1	9414.5	12057	13673	12273	7908.4	7935.2	9763	9437.8	5825.8	5867.8	14059	11900	8506.2
YC512118	282.28	247.24	281.272	C18H35NO	[M+H]+	Oleamide (9-Octadecenamide)	Lipids	Free fatty acids	301-02-0	1	38704	33438	75522	5916.5	45166	32221	49819	52397	55542	42673	48624	42343	33768	37657	23427	23154	31310	49346	40966	33384	30510	30637	36298	46224	48732	26928	32994	39756	32973	31869	35601	39775	44024	32376	39188	44494	32028	56026	42217
mws2623	281.25	281.25	282.256	C18H34O2	[M-H]-	11-Octadecanoic acid(Vaccenic acid)	Lipids	Free fatty acids	506-17-2	1	835350	1403200	1826100	1913500	2677200	1401400	1773300	1821800	1644700	1670800	1750100	1147800	1046300	1458200	1545000	1612500	1487300	1831200	1316800	1305200	1233800	1295900	1586800	1151900	1340000	1398800	1423900	2040200	2411400	1898800	1566700	1487100	1722400	1332700	1089500	1256900	2177300	1636900	1315900
mws0396	281.25	281.25	282.256	C18H34O2	[M-H]-	Elaidic Acid	Lipids	Free fatty acids	112-79-8	3	3948200	6776400	8397800	9443900	12215000	5829400	8000600	8711900	7131300	7404800	7702700	5847200	4719400	6524000	6640800	6901900	6793200	8108800	6075800	6436200	6214900	5722200	6854500	4868800	5836500	5895700	6693800	7922000	10811000	8898900	7127400	7113100	8584400	5602500	5508400	5917300	9824900	7245900	5939400
mws1489	283.26	283.26	284.272	C18H36O2	[M-H]-	Stearic Acid	Lipids	Free fatty acids	57-11-4	2	64006000	49641000	69197000	65424000	87405000	76000000	73456000	74127000	79460000	82219000	70794000	44908000	77590000	72484000	94640000	78355000	66866000	69712000	67702000	38757000	64510000	62051000	68138000	72581000	63952000	60596000	72708000	65379000	43739000	71665000	76772000	65190000	70296000	64426000	60947000	63567000	27400000	26320000	24480000
MWSslk132	285.21	223.21	286.214	C16H30O4	[M-H]-	Hexadecanedioic acid	Lipids	Free fatty acids	505-54-4	1	58528	42217	47041	62743	54508	58976	63931	54456	59090	52175	55668	57404	24783	27816	23688	23399	24270	29599	26225	25932	28365	25116	28581	26534	41021	42645	45938	40833	46256	53465	46278	46426	44998	53964	57031	59842	37864	40225	37279
pmn001686	287.22	241.22	288.23	C16H32O4	[M-H]-	10,16-Dihydroxypalmitic acid	Lipids	Free fatty acids	3233-90-7	1	4497.3	3666.3	4709.8	7275	12695	7732.3	6563.5	6180	6296.2	5270.3	4848.1	5591	5155.4	5009.5	4578.3	11465	8283.5	12488	4331.3	7437.2	9485.4	7159.4	9151.9	8069	13036	14464	12223	18322	11160	13166	14094	18720	21833	17991	18038	15205	8356	7861.2	7242.4
pmb0885	291	190.9	290.188	C18H26O3	[M+H]+	4-Oxo-9Z,11Z,13E,15E-Octadecatetraenoic Acid	Lipids	Free fatty acids	-	3	79912	62374	77166	70703	97765	89432	99478	120990	128050	73499	76103	76194	146180	158490	215570	196000	155860	135430	128820	121590	147140	160920	212610	184390	77358	72200	72987	88033	86947	107690	120460	120310	102190	73993	84052	86517	121500	129240	136060
MWSmce689	293.25	95.09	292.24	C19H32O2	[M+H]+	Methyl linolenate	Lipids	Free fatty acids	301-00-8	2	206540	226340	353330	58985	53568	82570	69954	68864	108250	126460	75237	80116	379370	196430	408190	227270	145100	268430	276380	241480	245870	429750	612720	265500	15911	9875.8	31830	21759	25779	19948	18044	21850	16748	30113	44882	30122	138780	148620	143660
pmb2792	293.21	193.1	294.219	C18H30O3	[M-H]-	13-Hydroxy-6,9,11-octadecatrienoic acid	Lipids	Free fatty acids	74784-20-6	2	36174	37064	28799	39831	37270	31736	38464	45305	38748	47198	46741	43569	36590	42868	42070	35613	41732	36343	38201	36775	40860	34365	36302	38246	39538	43299	42213	35577	34741	32431	36480	40515	36357	29948	30418	35594	26246	27977	29460
Zmpn003368	293.21	195.14	294.219	C18H30O3	[M-H]-	13S-Hydroxy-9Z,11E,15Z-octadecatrienoic acid	Lipids	Free fatty acids	87984-82-5	3	14068	10321	15951	19849	32629	19404	22020	17241	18819	13371	15206	20988	46548	41360	45964	50878	66466	63475	50114	65748	47222	54372	61396	51172	45069	26907	59005	37333	38094	44483	40694	14424	26423	40914	42447	66465	30784	30589	32231
Zmyn004732	293.21	185.12	294.219	C18H30O3	[M-H]-	2R-hydroxy-9Z,12Z,15Z-octadecatrienoic acid	Lipids	Free fatty acids	-	2	88176	65215	85308	140080	123410	136520	122180	105660	143100	101130	88038	109210	33643	27601	21135	56606	46319	65507	74012	40426	38610	40335	53956	30774	20825	16530	32040	16574	18785	19816	29196	16512	15315	20476	16143	18012	52213	49615	53097
Zmyn004676	293.21	113.1	294.219	C18H30O3	[M-H]-	17-Hydroxylinolenic acid	Lipids	Free fatty acids	-	3	24576	20951	31627	33279	27786	26708	40275	24421	28340	22111	35389	46828	34214	40296	39643	94552	71249	62861	197260	58940	35384	33391	38507	36961	32503	26457	41225	27997	19628	32703	37074	18716	25189	30357	24424	27669	35125	38760	35875
Lmcn009539	293.25	293.25	294.256	C19H34O2	[M-H]-	E,E,Z-1,3,12-Nonadecatriene-5,14-diol	Lipids	Free fatty acids	-	2	1643400	1735800	2238600	1560800	1404300	1370300	1625000	2361100	1844700	2349600	2285400	1677900	2842800	3876700	4007900	1982500	1457200	2948800	1636700	5145300	7541300	1802900	5483400	5509500	1242300	1327900	1471800	1438100	1980800	1575800	1541400	1502500	1842700	1018200	1698000	1282400	1887600	2062400	1807400
Hmqp005411	297.24	81.07	296.234	C18H32O3	[M+H]+	9-Oxo-12Z-Octadecenoic acid	Lipids	Free fatty acids	112543-32-5	3	20022	28653	19022	33146	25554	21300	17807	27521	18347	17431	25790	20131	7866	20108	12978	9822	13148	25749	15772	19496	15641	14306	21225	18748	14124	12211	14802	28324	23202	18468	27136	26857	31457	17611	18749	23174	21194	21859	20525
Lmbn005662	295.23	171.1	296.235	C18H32O3	[M-H]-	9(10)-EpOME;(9R,10S)-(12Z)-9,10-Epoxyoctadecenoic acid	Lipids	Free fatty acids	16833-56-0	2	16343	21031	23124	26826	28188	22488	25556	25367	23751	22089	22988	25449	16357	17987	17713	19678	19418	20040	19321	18916	17157	16985	17894	17071	18264	18757	19995	18478	23428	23849	21376	20860	20303	20209	21818	21349	21487	23057	19068
Lmbn005369	295.23	195.14	296.235	C18H32O3	[M-H]-	13(S)-HODE;13(S)-Hydroxyoctadeca-9Z,11E-dienoic acid*	Lipids	Free fatty acids	10219-69-9	2	67172	68747	87318	119170	109890	101360	100340	88853	95418	74336	82650	85973	92368	94813	105370	110490	118970	154420	118110	142560	101410	106510	142320	100450	85227	62861	96816	73963	77457	99579	104020	53641	62618	82450	70471	79240	94187	87559	85242
Rfmb091	295.23	195.14	296.235	C18H32O3	[M-H]-	9S-Hydroxy-10E,12Z-octadecadienoic acid*	Lipids	Free fatty acids	15514-85-9	2	66637	69016	87747	112600	111850	98556	104610	86050	101900	72720	86309	96327	100160	97978	111710	120160	123110	150940	116960	153880	106870	106340	135410	109660	87587	62621	96668	80512	74169	102610	109830	60466	69922	78179	72010	87183	90253	88679	87616
pmb2799	295.23	195.2	296.235	C18H32O3	[M-H]-	12,13-Epoxy-9-Octadecenoic Acid	Lipids	Free fatty acids	6799-85-5	3	6021.6	9802.1	11288	13162	12674	10649	12099	12633	11153	10533	9422.5	10967	8936.2	7572.2	8202.9	6018.3	6298	8503.1	8274.4	8798.2	5435.3	7915.6	7378	5742.6	8845.5	9406.1	9413.4	9239.6	11662	10908	8540.7	9410.3	9657.2	10017	9244.6	7085.3	9274.4	12072	7659.9
Zmyn004714	297.24	183.14	298.251	C18H34O3	[M-H]-	Ricinoleic acid	Lipids	Free fatty acids	141-22-0	1	38441	31014	34532	36300	41532	44593	44685	34641	39282	37152	35412	40990	21800	17885	22774	23462	16378	34397	35915	22718	32650	26577	37436	22111	22873	22902	27761	31933	24128	24024	22941	14865	33208	18606	18941	31453	27060	25100	27374
pmf0297	297.32	183.1	298.324	C20H42O	[M-H]-	1-Eicosanol	Lipids	Free fatty acids	629-96-9	3	39483	33326	36058	44892	44875	53340	34273	36543	39744	38725	40183	42287	20246	16054	26026	20734	20837	37210	38994	26311	35404	31396	38169	23342	23426	23279	28879	33104	25605	25398	19566	20717	34069	23065	20512	31691	25950	22539	24266
MWS5235	299.26	253.25	300.266	C18H36O3	[M-H]-	12-Hydroxyoctadecanoic acid	Lipids	Free fatty acids	106-14-9	3	13477	11896	16250	28184	23529	23084	23521	21227	25513	10492	12623	13156	7562.9	14233	6826.9	8064.9	10654	12939	78413	7099.8	8912.8	6341.6	8176.1	7976.7	12153	7937.9	12087	13206	10709	13393	11013	15098	10740	11329	10080	8707.2	13405	12963	9685.7
Zmyn005384	299.26	253.26	300.266	C18H36O3	[M-H]-	2R-Hydroxyoctadecanoic Acid	Lipids	Free fatty acids	26633-48-7	3	10615	17524	13704	23521	22460	13380	18903	21548	22784	18192	17234	17453	14133	22446	24964	27236	24428	29449	23362	19895	17934	15127	20719	19818	22584	19632	23958	23382	27128	22686	31430	35440	25115	20948	24634	18836	25536	20804	18579
MWS4295	299.26	253.25	300.266	C18H36O3	[M-H]-	DL-2-hydroxystearic acid	Lipids	Free fatty acids	629-22-1	3	11572	20526	18274	29223	26335	17700	23612	27152	26422	22526	24362	20535	17418	30324	26030	29667	27314	34050	28591	22907	21629	17625	23939	24388	24303	25680	27996	29413	32411	28601	35825	36387	29773	26558	28570	22487	30291	24453	21537
Lmqn008288	299.26	299.26	300.267	C18H36O3	[M-H]-	3-Hydroxyoctadecanoic Acid	Lipids	Free fatty acids	45261-96-9	2	176370	223220	181840	238260	144080	187070	296910	225870	199250	264000	180970	226300	1210000	362340	323640	323070	210110	207570	214490	228010	215160	546800	472090	333760	539400	600550	368310	452640	775010	304040	744370	841410	463190	1001200	489580	411140	387450	369650	367020
MWSmce549	303.25	57.07	302.246	C17H34O4	[M+H]+	1-Monomyristin	Lipids	Free fatty acids	589-68-4	3	979500	1555700	1348200	1114000	1187600	921640	1307900	1308600	1148500	1255000	1095800	1091700	1023200	1118000	1159300	848050	922570	1039600	1028200	1130100	1032500	993870	1050000	1031200	1115000	1150800	1103000	637170	987860	1030000	1003600	1079700	996870	1062100	1096300	910980	605340	581750	543970
pmn001610	307.26	307.3	308.272	C20H36O2	[M-H]-	Eicosadienoic acid	Lipids	Free fatty acids	5598-38-9	3	42776	57134	91295	118980	136840	69190	92409	113400	90272	86267	76996	73331	42623	32411	41986	71239	67137	81993	51355	62148	55283	52384	53415	50552	45967	51522	74566	71970	93725	64578	72778	59903	80999	61676	50687	73558	95297	80871	65529
pmb2791	309.21	209.1	310.1	C18H30O4	[M-H]-	9-Hydroperoxy-10E,12,15Z-octadecatrienoic acid	Lipids	Free fatty acids	111004-08-1	3	13429	13296	8407.4	16606	15513	11179	11898	19973	14808	15235	16406	17197	12551	12956	13930	10209	14837	12474	9304.7	13511	13424	12407	11636	10347	11941	15316	16312	10418	12640	10497	13680	14082	13373	12179	11012	12609	5198.4	6186.9	4436.4
Zmzn003953	309.2	227.2	310.214	C18H30O4	[M-H]-	13(s)-hydroperoxy-(9z,11e,15z)-octadecatrienoic acid	Lipids	Free fatty acids	67597-26-6	1	158860	177190	190840	274500	241590	206310	200860	228960	241010	235660	243330	219230	162500	196320	186500	215750	205790	298030	184300	160830	183330	153330	165510	179160	187880	210440	201880	221190	226900	222170	169530	183200	189380	181910	174660	180210	206740	183680	181100
Zmyn004449	309.21	171.1	310.214	C18H30O4	[M-H]-	9-Hydroxy-12-oxo-10(E),15(Z)-octadecadienoic acid	Lipids	Free fatty acids	-	3	5774.9	6426.5	7502.8	8679.8	7269.1	8281.9	9452.5	7907.3	7287.7	10020	9426.7	8513.9	8454.5	7858.5	6136.2	6886	8516.4	11318	6600.7	5980.6	9677.7	6865.4	11319	7037.5	5148.2	6245.4	6065.9	4470.5	5464.3	6142.9	5594.1	5209	5266.5	4907.1	5987.6	5737.2	8046.8	9192.7	6722
pmb2804	311.1	171.3	312.23	C18H32O4	[M-H]-	13S-Hydroperoxy-9Z,11E-octadecadienoic acid	Lipids	Free fatty acids	33964-75-9	3	11665	9649.9	16136	16907	13716	10479	13520	10042	14357	13913	12391	14187	10402	11772	10301	13879	11874	14902	11105	11935	16797	13404	15980	10606	10170	8818.9	8193.1	5383.6	7561.8	7963.7	13036	6618.8	7290.1	8974.6	10486	11242	12222	11959	10195
MWS80006	311.22	293.21	312.23	C18H32O4	[M-H]-	9-Hydroperoxy-9Z,11E-Octadecadienoic Acid	Lipids	Free fatty acids	5502-91-0	2	21642	23920	29905	19335	16610	24516	17651	15310	24647	26124	31577	29038	42334	47874	34546	33657	34611	50666	44947	39049	42454	40591	34880	38691	44530	43332	61589	27043	49234	36862	29655	33728	30594	64078	77573	69886	26153	26612	34941
Lmbn005287	311.22	249.22	312.23	C18H32O4	[M-H]-	7S,8S-DiHODE; (9Z,12Z)-(7S,8S)-Dihydroxyoctadeca-9,12-dienoic acid	Lipids	Free fatty acids	143288-65-7	2	45790	61440	65059	52716	45712	53649	44880	29934	48771	65199	71298	84525	93661	113380	84383	82032	85268	103830	89118	89469	90355	98230	84051	92896	95546	103640	118070	64646	96490	92288	73112	80610	64934	153600	183970	167640	69525	81666	77777
Rfmb087	311.22	293.21	312.23	C18H32O4	[M-H]-	9-Hydroxy-13-oxo-10-octadecenoic Acid	Lipids	Free fatty acids	-	3	9724.9	7454.2	12920	10313	12297	5749	10799	10061	8339.8	10688	16571	18631	9676.7	9645.9	7928.8	7778.9	6760.2	8378.7	7103.8	7390.3	6577.9	8872.3	6408.1	4275.5	6511.2	9287.3	7257.1	4894.7	7108.2	9015.2	7241.7	6031.2	4172.2	7039.8	8076	8884.7	7583.6	8358.8	7578
Lmbn004685	311.22	223.17	312.23	C18H32O4	[M-H]-	5S,8R-DiHODE; (5S,8R,9Z,12Z)-5,8-Dihydroxyoctadeca-9,12-dienoate	Lipids	Free fatty acids	-	3	17203	11664	13452	13004	13043	12555	10850	14177	12810	14720	14074	14662	15606	17581	14237	15875	14076	18503	17012	15868	15952	16209	13742	18042	19199	16121	17288	14321	13810	15270	16515	15036	16007	13275	13930	15575	11835	12055	13560
Lmbn005487	313.24	251.24	314.246	C18H34O4	[M-H]-	12,13-DHOME; (9Z)-12,13-Dihydroxyoctadec-9-enoic acid	Lipids	Free fatty acids	263399-35-5	2	87189	85972	115190	119830	107930	118690	138930	112110	128210	87881	99111	104640	39186	44669	40150	53422	47071	56376	50659	39833	46655	44414	46640	47200	72901	73504	83706	83074	74385	97489	80277	77188	84105	91689	90418	87739	75859	76814	73654
Hmqp006023	326.27	309.27	324.266	C20H36O3	[M+H]+	Ethyl 9-Hydroxy-10,12-octadecadienoic acid	Lipids	Free fatty acids	-	3	16275	13489	12861	17586	22419	13465	18739	12072	9502	12510	13395	8304.5	14810	14921	13652	11430	11017	9725.4	10853	15195	12436	11920	13578	9586.3	10438	11224	9031	8345.3	11464	11123	5699.2	8508.4	7701.5	8222.5	7570.3	6874.3	10568	11753	11321
pmn001694	329.23	229.15	330.241	C18H34O5	[M-H]-	9,10,13-Trihydroxy-11-Octadecenoic Acid	Lipids	Free fatty acids	29907-57-1	1	42144	41271	49017	79847	62386	69838	63677	64335	77259	54538	53059	61966	32343	34458	30319	38481	37904	52586	38006	37460	39223	47630	52581	33570	35698	33450	35958	34235	41095	43958	48919	40847	37647	38656	40797	38124	41712	47891	44955
Lmyn011997	337.31	337.31	338.318	C22H42O2	[M-H]-	Erucic acid	Lipids	Free fatty acids	112-86-7	2	27909	31319	85251	58603	66083	42193	95718	110600	88352	114710	101060	21408	73914	104640	49081	34986	46003	33026	44438	12605	68676	33151	41575	62635	40787	46371	39646	42708	22373	67572	65980	51518	43271	30515	32529	37813	93218	91083	52511
pmf0400	339.33	183.2	340.334	C22H44O2	[M-H]-	Docosanoic acid (Behenic acid)	Lipids	Free fatty acids	112-85-6	3	12511	15498	23945	21862	23033	31416	19070	24184	21944	27688	27969	10791	13832	15081	15320	14002	14803	18299	17911	17551	16995	18321	9984.2	18080	17578	16814	14761	7495.5	6589.7	13487	13280	14779	17833	12748	24304	13389	8405.4	9777	6296.8
pmp001276	677.37	677.37	676.367	C33H56O14	[M+H]+	1-Linolenoyl-rac-glycerol-diglucoside	Lipids	Free fatty acids	-	3	3665300	4535300	4917000	2251400	3502000	3169800	3652600	3418900	3731800	3209900	3230400	3478100	4426000	3768400	3533900	2858800	2158900	3309600	2185200	3850700	3717900	3989800	3888400	4691800	1860500	2476300	1754000	1730300	1580900	1799100	1675400	1684100	1723200	2009900	1793600	1676600	2847800	3613200	3176600
pmb1096	118.07	91	117.058	C8H7N	[M+H]+	Indole	Alkaloids	Plumerane	120-72-9	1	90962	54603	61353	28079	31423	32152	28220	23002	30798	58812	63328	35776	72370	65451	81297	39038	50885	38385	32818	34618	34598	54035	30428	45978	58341	49976	68425	33587	46495	25532	38802	19218	28681	49170	43752	46376	20019	40888	40395
MWSmce314	134.06	106.07	133.053	C8H7NO	[M+H]+	Oxindole	Alkaloids	Plumerane	59-48-3	2	36783	35269	26026	117760	87211	92419	112330	71186	81843	49938	55670	62946	15011	29874	8180.5	25508	57386	27034	34028	6022	9657.5	23500	14452	24274	405430	581300	548990	444500	324750	294460	503120	473360	488470	392280	274990	354570	181810	159410	151970
Hmmp002124	146.06	118.06	145.053	C9H7NO	[M+H]+	Indole-3-carboxaldehyde	Alkaloids	Plumerane	487-89-8	1	79877	60165	58933	25656	27428	38350	31736	19475	30101	58404	29464	50221	77045	55356	72077	24355	34060	25921	42707	43645	42413	42252	20270	43859	62969	64483	59039	34836	24899	18717	31146	29482	28568	51853	44716	46682	23441	40274	36204
pmb0819	157	130	156.069	C10H8N2	[M+H]+	3-Indoleacetonitrile	Alkaloids	Plumerane	771-51-7	3	64320	47048	34783	21020	14556	23835	20622	15104	17236	48486	46428	38554	56757	34509	54354	28041	36765	21645	20314	19461	23709	20580	26620	26507	42704	63430	59135	32728	14568	19549	23199	30396	22110	42890	41706	56742	13142	40524	31807
pme1651	176.1	130.1	175.063	C10H9NO2	[M+H]+	Indole 3-acetic acid (IAA)	Alkaloids	Plumerane	87-51-4	3	161660	225020	205680	93201	45513	62370	130460	96978	114260	97678	95301	114780	254670	257970	219670	134030	133280	105910	155020	189380	186240	202680	145270	181270	119600	115990	139510	83997	70248	92226	76291	40387	70578	82414	64448	73033	115510	103510	123570
Hmmp001310	188.07	118.07	187.063	C11H9NO2	[M+H]+	3-Indoleacrylic acid	Alkaloids	Plumerane	1204-06-4	1	31788000	25327000	25208000	13064000	13303000	13805000	13199000	9455600	13405000	22313000	20566000	21168000	31400000	26356000	31858000	15625000	17300000	15281000	15892000	16361000	15579000	18487000	15346000	19000000	22091000	21519000	26604000	12360000	9409000	9137200	12816000	10100000	12429000	21247000	19912000	19456000	15196000	15041000	16445000
Zmtn001624	188.04	144.05	189.043	C10H7NO3	[M-H]-	N-Acetylisatin	Alkaloids	Plumerane	574-17-4	2	1410000	1065600	1022400	758570	594610	841300	759940	577290	927880	1143700	1127700	879200	1763100	1671700	1650200	2006000	1633300	1694500	1823100	1370200	1387500	1321100	1078400	1143800	608820	574610	689350	375330	316780	402590	419040	489710	441720	410980	311910	455280	961960	864480	891110
Zmbp002538	205.1	146.06	204.09	C11H12N2O2	[M+H]+	1-Methoxy-indole-3-acetamide	Alkaloids	Plumerane	-	1	4040800	2594000	2768700	1429800	1436700	1486000	1405400	1252900	1624400	2617000	2170500	2474500	3820300	3334100	4314600	1863700	1954600	1864200	1931100	2022000	1929600	2057100	1787200	2479000	2820200	2765600	3283800	1559700	1263600	1042300	1707600	1361600	1644000	2786200	2312000	2457500	1588400	1856800	2079900
Lmrn003201	204.07	158.06	205.074	C11H11NO3	[M-H]-	Indole-3-lactic acid	Alkaloids	Plumerane	1821-52-9	3	8783	2859.2	5317.5	12102	13558	9800.2	11136	17032	10086	2262.3	9	1181.6	8310.5	15229	6462.4	28290	28457	35539	21147	15093	25138	12280	26189	6843.2	2310	9637.5	7326	18218	26562	23142	30127	42824	19356	7237.2	2965	1855.8	15269	6435	13710
pmb0818	206.1	147.5	205.074	C11H11NO3	[M+H]+	Methoxyindoleacetic acid	Alkaloids	Plumerane	3471-31-6	3	3650700	1650100	1490800	800780	914740	1260500	868550	787110	1025900	1675900	1688600	1825100	2662400	2422700	3076500	1508800	1514900	1460200	1580800	1643700	1600900	1631600	1599000	1931100	2286000	2390200	2754900	1245400	1072600	1025600	1514000	1143100	1363100	2448600	2187300	2063900	906460	1332700	1574600
mws0677	219.11	160	218.106	C12H14N2O2	[M+H]+	N-Acetyl-5-hydroxytryptamine	Alkaloids	Plumerane	1210-83-9	3	377560	382810	371560	397370	410110	388970	400690	377090	338600	394430	352000	357050	364700	289050	360600	394780	445230	380420	442470	464780	433130	402550	352300	356300	346570	271070	388120	360940	303230	427120	416550	331510	327510	379260	460250	489910	325400	399360	327790
pmb0426	219.1	174.4	218.142	C13H18N2O	[M+H]+	N,N-Dimethyl-5-methoxytryptamine	Alkaloids	Plumerane	1019-45-0	3	6650	9924.8	8299.2	15771	11627	24880	8281.8	24096	14934	10370	3268.7	6622	15752	17442	17425	10759	8302.5	12456	16555	15776	16625	11599	7436.2	4151	8314.5	4963.5	14106	16554	9149.2	14069	14555	15362	14119	7477.5	16632	11631	9122	13195	14129
Hmyp002656	222.08	130.06	221.068	C11H11NO4	[M+H]+	Methyl dioxindole-3-acetate	Alkaloids	Plumerane	57061-18-4	3	126630	100980	77160	17483	24121	23830	7865.5	12353	14592	32127	19087	15816	294160	338350	226560	137890	109880	125010	173800	127160	200270	146470	94000	112560	169860	237740	280120	77738	75531	65686	88283	99293	69933	144890	208680	157500	75276	107890	133380
pmb0770	353.15	177.1	352.142	C20H20N2O4	[M+H]+	N-Feruloylserotonin	Alkaloids	Plumerane	68573-23-9	3	10128	3769.6	15918	15714	22156	16906	21460	20306	30390	38253	20339	27457	15332	7535.5	16720	21447	19271	31814	23745	14945	23382	26679	30922	28823	15121	17491	9963.2	28204	30164	31172	26538	34776	39844	22547	34025	27252	19941	23373	27473
mws1138	551.15	303.04	550.143	C24H26N2O13	[M+H]+	Betanin (Betanidin-5-O-glucoside)	Alkaloids	Plumerane	7659-95-2	2	636650	901780	775590	698730	745750	458790	735040	579180	632700	406200	523300	593310	1040000	705780	742290	587910	564110	666510	779400	702690	706300	440290	487140	466760	1534400	797310	1021000	513380	527580	699410	677980	579830	622660	726470	730690	552810	453340	689270	675970
mws0918	283.06	268	284.068	C16H12O5	[M-H]-	Prunetin (5,4'-Dihydroxy-7-methoxyisoflavone)	Flavonoids	Isoflavones	552-59-0	2	51540	39834	29229	72587	40876	68774	67512	44270	54098	51470	53630	53908	9	9	9	9	9	9	9	9	9	9	9	9	9	9	9	9	9	9	9	9	9	9	9	9	20574	19084	20577
Lmmp004504	287.06	153.02	286.047	C15H10O6	[M+H]+	2'-Hydroxygenistein	Flavonoids	Isoflavones	1156-78-1	2	26045	32672	35329	72657	91995	71128	71498	70356	71959	40830	55583	33910	37849	27222	73602	110210	137910	119230	136880	104670	103340	106850	139900	73888	60967	74612	59062	181320	145800	142630	139220	153310	147890	75249	68551	95843	70139	66327	92896
pmp000548	301.07	286.04	300.063	C16H12O6	[M+H]+	Pratensein	Flavonoids	Isoflavones	2284-31-3	3	93037	92073	80034	176910	163210	235760	166450	128730	166160	157740	140910	158650	13212	11477	10352	10698	12802	10264	12644	16302	14421	12971	7796.9	13084	18168	14981	12384	9	16355	13742	7991.5	11213	4160.9	32313	38022	28449	51651	48115	47201
MWSHY0063	433.11	271.06	432.106	C21H20O10	[M+H]+	Sophoricoside	Flavonoids	Isoflavones	152-95-4	1	4048100	4186000	4502100	5571400	5772200	6139500	6329700	6390600	5763500	14284000	11695000	10584000	8355200	10840000	7407100	6267500	5766800	6614400	8386200	15719000	11554000	13689000	7690000	27407000	7405100	5635400	8133100	4726900	5022000	4853500	4728700	4683300	4577400	29992000	32910000	35127000	9486900	10484000	9350500
pmp000413	433.11	283.06	432.106	C21H20O10	[M+H]+	Genistein-8-C-glucoside	Flavonoids	Isoflavones	66026-80-0	1	3227600	2680300	4731100	5505300	8489200	7448200	6349000	8427900	6792400	2811400	2111000	2533000	6755700	8788600	6013900	12255000	9239900	13542000	8262300	10148000	9230200	8363100	10244000	7366600	6086300	10154000	10188000	10928000	9805200	8515800	9048800	14658000	10659000	7506900	8444900	6484000	6787700	8339200	7197400
Lmgp004731	433.11	271.06	432.106	C21H20O10	[M+H]+	Genistein-7-O-galactoside	Flavonoids	Isoflavones	-	1	3589200	4456500	4314400	5474100	6007000	6803000	6173500	6713000	5757900	13527000	11250000	11614000	7947900	10657000	7273400	5640400	6082700	6552100	9530300	14802000	12126000	12930000	7741000	23879000	8256300	6027500	8721200	3538600	5594000	5296900	5456200	5447400	4567600	30386000	33353000	30824000	9997100	10050000	9501500
Lmgp003335	433.11	271.06	432.106	C21H20O10	[M+H]+	4',5-Dihydroxyisoflavone-7-O-galactoside	Flavonoids	Isoflavones	-	1	3927900	4223400	4166600	5155800	7138000	5418400	6188400	6502500	6326700	14461000	10934000	12259000	8056000	10645000	6768600	5915400	5232700	6513800	8970600	15762000	10966000	13347000	7426900	26711000	7901800	6053500	7213300	4844300	4988900	5294500	5014700	4843500	4923900	32137000	33127000	33907000	8230500	9856000	9611100
Lmyp006086	447.13	285.07	446.121	C22H22O10	[M+H]+	Prunetin-5-O-glucoside	Flavonoids	Isoflavones	-	1	214590	184370	435130	107650	97327	105510	94307	79860	105000	155280	102270	142000	752710	632040	492480	13474	16470	12630	46205	76518	64319	111560	28845	161530	243730	261630	626920	9586.4	10157	7723.9	7753.2	13763	8850.4	278670	279110	271200	129320	124350	129070
pmp000415	447.13	285.07	446.121	C22H22O10	[M+H]+	3'-Methoxydaidzin	Flavonoids	Isoflavones	200127-80-6	2	79973	74924	155810	2326.8	8003.3	12896	6369.4	10126	5561	59359	49385	52783	321940	228380	199550	7318.1	6324.3	7703.1	12509	43660	19721	50051	14423	72788	91145	92123	240380	5101.4	11698	4747.2	5569.1	4063.5	2597.3	114720	131420	107800	47467	56856	56524
Lmmp002795	463.12	301.07	462.115	C22H22O11	[M+H]+	Pratensein-7-O-glucoside	Flavonoids	Isoflavones	36191-03-4	2	142020	134250	304830	19065	15070	28211	20361	13965	25834	63518	44267	50651	327440	315550	417320	33075	21760	27113	36891	46744	50272	79913	38299	96409	158570	150570	326310	20299	18442	27095	14748	28475	16245	137280	132910	127530	81652	90162	93927
Lmgp004829	493.13	331.08	492.127	C23H24O12	[M+H]+	5,7,4'-Trihydroxy-6,8-dimethoxyisoflavone-7-O-galactoside	Flavonoids	Isoflavones	-	2	264020	259230	172940	523510	579140	643070	775870	700660	463270	230500	197230	350370	1080100	833130	626160	2395200	1677700	2241800	1363900	1688000	1755700	1234100	1753500	1365000	956270	688730	927760	2249400	1352100	1357700	1395500	2315800	1842900	1090600	1193900	1167300	1004400	452110	908120
pmp000411	565.16	433.1	564.148	C26H28O14	[M+H]+	Genistein-8-C-apiosyl(1→6)glucoside	Flavonoids	Isoflavones	-	2	272890	388210	845000	1268400	1358700	1055500	1340200	1357600	1277500	307840	298930	417930	1736200	1037900	956670	3220800	2887800	3226900	2363300	2203500	2184000	2254600	2391200	1869400	903770	1190200	1111200	2950100	2341600	2378000	2554300	3409200	3114800	1172800	1067800	1317800	1746900	1562200	1590000
Lmgp004474	579.17	271.06	578.164	C27H30O14	[M+H]+	Genistein-7-O-galactoside-rhamnose	Flavonoids	Isoflavones	-	2	667540	243320	434470	789270	990160	797900	890200	1114000	976380	277040	292750	216250	1550200	1609800	1255400	3039200	2994000	3074900	2019500	2113400	1594900	2050100	2853200	1452100	421180	570070	953850	2296200	1452300	1768600	1654900	1717600	1539500	336240	350620	367730	896380	936120	1202500
mws1012	147.04	103	146.037	C9H6O2	[M+H]+	Coumarin	Lignans and Coumarins	Coumarins	91-64-5	1	2306200	1648100	1304100	220350	176500	216120	185130	162970	208620	2479100	2218500	1912500	1191000	990310	1315800	71918	85875	66912	528410	1184200	825030	732020	317100	1473400	969040	1344600	1919200	54418	46886	43307	42063	47185	52774	3183100	3300800	3506100	1050800	912920	882850
mws0987	161.06	115	160.052	C10H8O2	[M+H]+	6-MethylCoumarin	Lignans and Coumarins	Coumarins	92-48-8	2	161190	177690	188220	213060	214310	201490	210910	157640	221300	207970	186230	186130	17752	19908	19707	24640	13406	13014	14439	19387	18666	25882	23931	14316	48552	38764	47006	50897	67355	48625	45625	51846	56166	52941	51251	53504	80285	77668	69542
pme2996	161.02	116.6	162.032	C9H6O3	[M-H]-	4-Hydroxycoumarin	Lignans and Coumarins	Coumarins	1076-38-6	3	29781	17710	22008	18764	21849	12931	19409	17527	21569	15844	20735	28685	21102	12499	21902	17379	14244	11814	21687	15244	16623	18669	13521	14225	21435	25720	19689	15787	27335	19368	13373	20399	20570	22704	22956	12472	15239	17730	20092
mws1075	177.05	121	176.047	C10H8O3	[M+H]+	7-Methoxycoumarin	Lignans and Coumarins	Coumarins	531-59-9	1	3731600	1811600	764530	27141	35017	39751	14967	18663	17503	773520	729950	743420	3063600	2137100	2456800	12121	9864.2	9841.4	247400	700360	422070	1172700	537710	975470	2539800	1747700	2573600	13626	8537	11963	11463	10573	3689.7	2127000	1900200	1618000	851350	922810	850230
MWSmce221	193.05	91.05	192.042	C10H8O4	[M+H]+	5,7-Dihydroxy-4-methylcoumarin	Lignans and Coumarins	Coumarins	2107-76-8	3	31211	31218	36853	22662	33673	35279	35523	39318	21500	22210	26030	40130	39308	41653	28402	30842	16458	65102	35390	14828	36096	43079	42240	21816	54561	62091	52242	40520	71758	52416	49057	54344	50958	45278	29041	14650	25101	42952	21240
Lmbp003825	325.09	163.04	324.085	C15H16O8	[M+H]+	Skimmin (7-Hydroxycoumarin-7-O-glucoside)	Lignans and Coumarins	Coumarins	93-39-0	2	157330	74952	85908	126520	125650	123560	124570	119910	66622	99796	96319	134140	151940	159680	150250	202990	164000	275780	79930	172690	210890	136220	173140	209050	103520	185310	129110	258380	208010	218080	163390	127870	190060	98772	118530	159480	80230	132880	93784
pmb0382	339.09	177.2	338.079	C19H14O6	[M+H]+	O-Feruloyl 4-hydroxycoumarin	Lignans and Coumarins	Coumarins	-	3	11447	12021	18652	29352	29424	32670	20109	16444	18738	30786	24340	20436	19611	34492	19681	47525	36899	28697	30965	39994	31226	31976	18836	26022	22646	21971	28645	25500	38600	49840	32765	35072	27870	26219	19011	18775	27701	28672	22090
Lmbn001162	339.07	177.02	340.079	C15H16O9	[M-H]-	Esculetin-7-O-glucoside	Lignans and Coumarins	Coumarins	-	2	727740	872720	1172200	859800	1099700	1237400	1309800	1336000	1318400	730380	759600	729300	1187000	1300700	1307400	1346900	1596500	1283300	1138100	1408700	1090400	1104200	1366100	1043200	1637800	1384400	1596700	1330600	1242900	1217600	1057400	1277100	1243300	1355300	1260200	1361700	1168900	1327600	1234300
mws1015	339.07	177	340.079	C15H16O9	[M-H]-	Esculin (6,7-DihydroxyCoumarin-6-glucoside)	Lignans and Coumarins	Coumarins	531-75-9	1	1079500	955800	990780	875660	992230	1172000	1274300	1135100	1379800	799720	752180	794210	1276800	1427800	1315000	1317500	1182100	1259400	1111900	1725900	1074600	1116700	1777000	1197200	1588700	1200900	1715500	1581400	1407100	1508200	1408400	1279000	1357800	1355300	1220000	1832200	1242700	1546700	1164700
Cmyn001328	339.07	177.02	340.079	C15H16O9	[M-H]-	Daphnin	Lignans and Coumarins	Coumarins	486-55-5	1	987180	811010	1228000	1037100	1027600	1153400	1235800	1170600	1182300	657160	669830	700560	1248400	1518200	1364400	1415800	1463800	1534900	1591700	1486100	1463300	1201700	1341600	1123000	1366400	1574400	1865100	1292600	1348800	1638100	1540000	1588700	1192700	1575500	1508700	1574300	1274900	1494900	1365400
MWSmce024	355.1	193.05	354.095	C16H18O9	[M+H]+	Scopoletin-7-O-glucoside (Scopolin)	Lignans and Coumarins	Coumarins	531-44-2	3	150940	70068	73335	202810	177010	183840	186270	187370	185750	93425	77230	82500	98507	165270	85093	181140	180390	198460	167080	153910	191660	178630	187070	125720	176550	92601	160910	278080	208740	248920	257760	316630	263500	94868	79484	89724	126140	173160	148380
Lmgp003270	369.16	177.06	368.074	C16H16O10	[M+H]+	Scopoletin-7-O-glucuronide	Lignans and Coumarins	Coumarins	132752-65-9	2	1380700	1174700	988270	1263800	1436400	1709500	1380900	1293500	1319900	1631200	1299000	1362100	1928800	2825900	2130900	2381200	2069700	1905000	1875500	2869800	2756400	3053100	2412500	3365500	1747400	1280500	1675100	1931100	1834400	1924300	2282900	2012500	2503600	2113100	1848200	1995300	1648800	1481100	1943000
Lmjp003090	385.11	223.06	384.106	C17H20O10	[M+H]+	Isofraxidin-7-O-glucoside	Lignans and Coumarins	Coumarins	483-91-0	3	24083	42570	96605	17902	32600	19092	26718	18472	23866	48758	50554	59774	48031	61502	52678	19692	29602	26515	22477	38321	44150	40144	33924	24029	62374	53319	46190	27069	22950	21865	17569	22838	14212	46380	35186	37621	29192	52957	21346
mad1424	427.05	295.05	426.043	C17H14O13	[M+H]+	Ditartaroyl-hydroxycoumarin	Lignans and Coumarins	Coumarins	-	3	547590	438160	427910	465390	455910	448630	508260	519940	384160	402400	474120	431930	792250	745760	784340	738620	717080	692430	727410	702750	813330	806980	739020	765730	593220	556240	587210	704140	567340	629700	713490	697550	694860	538430	585550	598940	451820	612170	650970
mws0133	123.06	80.05	122.048	C6H6N2O	[M+H]+	Nicotinamide	Others	Vitamin	98-92-0	1	1438100	1541400	1710100	1742200	1766000	1604500	1626000	1684300	1635600	2152900	2135900	2200700	2349000	2993700	2104000	2381300	2522500	2388700	2515800	2840200	3530500	2623100	3128500	3974100	2770700	3036100	2182700	2272700	2065000	1640200	1405200	1505000	2405600	1560300	1457000	2530500	2266500	2123400	2116600
pme0490	124.04	78	123.032	C6H5NO2	[M+H]+	Nicotinic acid (Vitamin B3)	Others	Vitamin	59-67-6	2	108900	75391	54955	60188	50479	58116	60882	52554	47321	52892	33357	62906	148840	202410	120910	149020	159340	116050	80695	164890	217680	80834	161000	144450	105990	79316	73576	77568	71414	39069	47141	44371	77620	13722	13818	40754	80387	84899	95905
Lmbp000668	124.04	78.03	123.032	C6H5NO2	[M+H]+	Isonicotinic acid	Others	Vitamin	55-22-1	2	107750	69143	98128	49903	41263	45506	52752	50524	57800	44076	34154	45118	154980	173350	95868	142100	164790	117140	126770	158610	202440	91105	183670	158800	89890	77084	84708	94341	59354	27001	42923	60816	65415	21905	19753	23964	77328	71685	65956
pme2165	155.01	111	156.017	C5H4N2O4	[M-H]-	Orotic acid	Others	Vitamin	65-86-1	3	166310	312200	126710	391070	426480	473990	355510	299140	357490	214550	277920	255450	122600	153710	102190	78517	76819	67450	52518	88267	86167	75859	66364	47899	98030	139170	157960	176360	254530	211840	178300	247040	247100	160780	110290	144600	156480	162180	198220
Zmjp000624	168.06	150.05	167.058	C8H9NO3	[M+H]+	Pyridoxal	Others	Vitamin	66-72-8	3	68825	98143	118530	52105	68314	66384	56611	51981	53958	76700	79635	89254	242560	172740	139370	145940	171980	195890	177380	160860	171340	165510	139500	116070	123040	124120	156620	118880	97133	72006	72263	78537	94536	76622	82409	62190	65061	93897	69654
pme1383	170.08	134.1	169.074	C8H11NO3	[M+H]+	Pyridoxine	Others	Vitamin	65-23-6	1	194840	332710	404070	13033	25239	19961	29883	17614	21463	51335	78214	75043	1095700	981130	658550	394900	390760	499130	437900	509360	430600	398500	327760	191040	776770	742550	876520	117420	100470	85790	60307	90601	98973	157590	127930	101290	217180	211680	193500
MA10039492	173.01	71.03	174.016	C6H6O6	[M-H]-	Dehydroascorbic acid	Others	Vitamin	490-83-5	3	221230	51046	95247	7412.5	87039	96556	68504	93637	96919	142160	107940	71713	91238	116110	171080	63549	66910	77376	126850	90519	109790	122090	127040	137750	92127	95033	100660	140760	102660	102490	11262	65997	100470	76813	97820	73334	127260	76944	117750
MWSmce690	175.02	59.01	176.032	C6H8O6	[M-H]-	Erythorbic Acid; Isoascorbic Acid	Others	Vitamin	89-65-6	1	344680	239520	261710	811780	975110	903840	814160	777170	773920	131200	132930	119080	265860	191230	265620	783890	914860	825470	779560	601790	747240	770080	708720	564770	274510	253410	263180	1329600	1762700	1255900	1835500	1226700	1283700	331650	310720	210150	456060	445490	586320
Hmfn000531	175.02	87.01	176.032	C6H8O6	[M-H]-	L-Ascorbic acid (Vitamin C)	Others	Vitamin	50-81-7	1	228610	239840	259020	399250	372340	389660	365040	364830	188570	173510	168740	261970	415520	399940	354230	290150	436880	362970	502990	291350	368860	434110	307290	380590	350050	168890	305970	406410	505840	403620	660830	392590	450420	203510	151980	173100	262020	225840	225160
pme2596	184.06	148	183.053	C8H9NO4	[M+H]+	4-Pyridoxic acid	Others	Vitamin	82-82-6	3	125660	90298	73599	48743	38516	34304	40780	37042	44659	68895	64245	68239	299140	248390	263830	157590	168050	165970	152360	137950	137800	238570	162130	173630	169760	160970	179610	130440	125150	94376	108560	118310	117320	151350	157360	137770	112380	104760	104810
mws1337	220.12	202.1	219.111	C9H17NO5	[M+H]+	D-Pantothenic Acid	Others	Vitamin	79-83-4	1	2624500	2733400	2837200	3097200	3111500	2956600	2810300	2875400	3170300	2261400	2189100	2386800	2439600	2288000	2359400	3075800	3228100	2787000	2869400	2289600	2903200	2686700	2847600	2240700	2772900	2761500	3192600	2593100	2648400	2548900	3289800	2939800	2749400	2339700	2584600	2154600	2351000	2586400	2584500
pme2266	245.1	227	244.088	C10H16N2O3S	[M+H]+	Biotin	Others	Vitamin	58-85-5	3	230490	200230	111580	101040	103610	118300	92722	71660	96990	148320	170610	212270	245200	231870	222000	122160	128230	133420	149900	146810	165790	168150	113990	197650	155020	127780	154720	58736	52742	53479	52626	44931	54838	87281	103440	99319	70626	114350	87612
pma3101	256.08	124.1	256.082	C11H14NO6+	[M]+	Nicotinate D-ribonucleoside	Others	Vitamin	17720-18-2	3	1622200	1043200	937700	2008600	2467800	2401500	2087200	2847300	2183700	745050	862130	1092600	1534600	2243200	1415200	2532700	2503100	2370700	1823800	1864000	3200700	1842100	1260000	1538200	1135200	2083300	1414100	3199000	2191500	2497400	2722200	3593600	3088800	869990	1226800	880340	985560	1925900	1316900
pma1751	286.09	124	285.085	C12H15NO7	[M+H]+	N-(beta-D-Glucosyl)nicotinate	Others	Vitamin	-	3	394710	267140	144630	51902	71481	46680	93981	103340	57103	26536	37858	28183	115050	143260	70806	61954	72575	75482	65652	90189	139770	68164	100730	86182	101130	67548	92286	76898	75622	57815	102200	66928	68374	21493	22080	14774	53598	82156	79456
pme2816	301.2	209.2	300.209	C20H28O2	[M+H]+	4-Oxoretinol	Others	Vitamin	62702-55-0	3	6927.1	4101.8	7371.1	7211.3	10228	7902.8	7949	4701.4	10053	4421.3	7602.3	5926.6	8534.5	9496.3	10479	10207	11313	13645	13375	11640	12799	12216	14491	11623	4696.5	5604.6	5715.1	8487.5	3973.8	7828	4806.1	6494.6	7501.4	3787.4	5661.7	4981.1	6448.9	8452.5	6730.7
MWSmce278	327.19	159.08	326.188	C21H26O3	[M+H]+	Acitretin	Others	Vitamin	55079-83-9	2	5435	6315.2	9428.4	14158	8050.8	5175.5	8776	8574.6	8485.7	11470	7319.3	7373.4	3196.6	6122.5	3801.3	4507.2	4867.1	7646.5	4671.7	4657.4	6057.1	4975.7	5409.1	4747.2	8365.7	11284	11967	8090.6	6208.7	9087.6	7232.3	7016.7	5041.5	4555.8	6075.4	7800.6	6420.2	7496.9	6579.5
pmb0789	332.13	152.07	331.127	C14H21NO8	[M+H]+	Pyridoxine-5'-O-glucoside	Others	Vitamin	-	3	24973	49754	88833	5004.2	8036.2	10924	7734.6	6287.6	5086.4	17139	18348	22153	350680	238250	203530	104360	93921	139480	130300	131020	121660	135970	113210	73528	331680	273960	274300	61146	55012	36461	25689	41353	70332	64795	63999	48453	63113	76879	63964
mws0232	377.15	243	376.138	C17H20N4O6	[M+H]+	Riboflavin (Vitamin B2)	Others	Vitamin	83-88-5	3	114850	226080	121040	215510	205060	173250	184350	180360	151510	234010	182090	244530	228760	200820	163500	147280	151440	170390	170620	140490	216370	144200	196750	145790	165920	153320	150650	168210	110820	196940	121200	139530	150510	168230	113290	132120	126120	170780	156230
pme2287	423.03	302	425.044	C12H19N4O7P2S+	[M-2H]-	Thiamine pyrophosphate	Others	Vitamin	136-08-3	3	13504	7582.7	11844	25733	21678	26996	30027	23024	18101	15647	24820	27092	26845	7324.3	37807	23194	30860	25209	24981	9244.5	33912	31230	24432	12263	19848	12372	20454	18395	7154.4	15116	11266	16136	14088	11206	8162.2	12743	16646	19152	16578
pme1014	445.3	341.3	444.303	C31H40O2	[M+H]+	Menatetrenone (Vitamin K2)	Others	Vitamin	11032-49-8	3	204850	140500	148880	163710	170340	201770	197830	178110	143240	196560	225100	198910	194530	181010	178890	186440	176460	111950	187740	164540	177380	200780	179000	208070	316710	309840	348500	298120	261300	348670	347700	292030	240810	329210	263800	317580	332360	567000	401770
MWSmce674	451.36	89.06	450.35	C31H46O2	[M+H]+	Phylloquinone (Vitamin K1)	Others	Vitamin	84-80-0	3	6313.5	11132	8861.2	8731	7898.6	8365	7677.6	10793	10630	7369.4	7536.6	7744.4	7937.2	10547	7984.7	8628.9	9534.3	7800.9	8750.5	8448.7	7830.2	7708.4	6428.9	7309.2	7010.5	10722	7535.7	7215.3	6395.6	9524.9	6843.1	6974.4	7037	9609.2	8670.5	9683.7	9410.2	7882.3	11028
pma0134	121.04	93.06	120.042	C4H8O4	[M+H]+	D-Threose	Others	Saccharides and Alcohols	95-43-2	3	9862.6	5768.6	4799	7778.7	9697.2	17179	5769.2	10129	4119.5	8485.4	5062.1	5999.4	131420	144950	279060	63899	29033	95833	59762	39991	68771	114080	63853	50177	14264	9583.9	11252	2979.2	10302	5999.9	6759.5	5821.9	7489.2	5297.8	7620	9112.3	29754	28469	24021
Lmbn000198	133.01	71.01	134.022	C4H6O5	[M-H]-	3-Dehydro-L-Threonic Acid	Others	Saccharides and Alcohols	-	1	13444000	14667000	13456000	11803000	13632000	12467000	12934000	12506000	11652000	13811000	13234000	13426000	14352000	11904000	14208000	12857000	10280000	14248000	13849000	16598000	16186000	14942000	16412000	14915000	22692000	25366000	24639000	29636000	29545000	28143000	29727000	32317000	28160000	31361000	28481000	30201000	18189000	17961000	20100000
mws0889	135.03	75.01	136.037	C4H8O5	[M-H]-	D-Threonic Acid	Others	Saccharides and Alcohols	3909-12-4	1	5263700	3564900	4079600	3391900	3867000	3575700	3735500	6327900	4374200	3348700	3509100	4217700	3604500	4859000	4491700	6767600	6134400	4927500	5579600	4219400	5978300	4404500	5165900	5367100	5117300	6436800	5270800	4847700	4353700	5133300	5107900	5820500	5018600	4766000	5826000	5252900	5526300	5203000	5871000
Zmyn000230	147.03	57.03	148.037	C5H8O5	[M-H]-	2-Dehydro-3-deoxy-L-arabinonate	Others	Saccharides and Alcohols	-	1	649300	591560	759790	691440	733230	588530	646640	728610	660990	488800	573930	582240	727500	748160	833900	881260	854960	996880	751630	794170	796380	659120	970550	848310	862530	691850	680320	927490	795660	800020	649750	884270	876100	680490	687680	598430	703560	762690	709150
ML10171848	147.03	85.03	148.037	C5H8O5	[M-H]-	D-Arabinono-1,4-lactone	Others	Saccharides and Alcohols	2782-09-4	2	298350	199550	199330	160820	147780	187110	161560	177040	164240	186660	219510	153410	281980	262010	301790	264360	265350	274030	262840	304030	285180	261190	313610	245500	296430	341260	228110	296780	281160	227930	298620	277460	245020	300090	240270	243890	242490	290070	250430
MWSmce676	149.05	59.01	150.053	C5H10O5	[M-H]-	D-Arabinose	Others	Saccharides and Alcohols	28697-53-2	3	313370	231980	197700	236610	225000	219270	182480	213560	199000	273390	245870	247510	312800	309450	301550	339410	339100	305460	280180	399060	391160	325280	301310	351510	283980	226740	296240	254600	212480	220510	250360	243230	205760	351460	289210	260760	221340	221110	218580
Zmgn000173	149.05	75.01	150.053	C5H10O5	[M-H]-	D-Ribose	Others	Saccharides and Alcohols	50-69-1	3	488890	655930	600780	655290	613220	517060	637470	551420	572580	700140	697040	736700	423540	404480	385340	453670	478230	459870	479770	470430	516980	452830	465190	494950	364350	293440	348850	409350	325980	343790	375590	255020	296820	372830	356860	406410	412650	379030	458590
MWSmce199	149.05	59.02	150.053	C5H10O5	[M-H]-	L-Xylose	Others	Saccharides and Alcohols	609-06-3	3	252940	231450	214400	187530	248250	174940	237450	215620	180140	313550	284810	267860	252770	354240	324460	298740	299100	281040	359720	333700	310570	313530	265420	343160	243370	245650	309390	244080	193980	215740	210080	311590	224370	233560	220040	263680	162140	197080	247520
pme0513	151.06	59	152.068	C5H12O5	[M-H]-	Xylitol	Others	Saccharides and Alcohols	87-99-0	3	64948	71223	58612	72734	68110	66484	49918	49780	41901	46048	67840	50081	138470	113770	134570	133000	157210	126450	138330	115210	130080	175480	143560	154270	102570	91701	94005	56738	56727	85172	123570	92436	80508	89634	125790	113190	73789	78822	73594
mws0437	151.06	71	152.068	C5H12O5	[M-H]-	D-Arabitol	Others	Saccharides and Alcohols	488-82-4	3	75589	73492	46722	61966	56358	67555	57856	53526	63661	79628	63432	51024	169670	193790	169960	159840	227410	199870	193790	119390	187390	209400	169140	205260	108680	132790	137900	85628	69914	74740	144670	105590	79702	149940	150240	147290	86165	81168	124490
mws0213	151.06	71	152.068	C5H12O5	[M-H]-	Ribitol	Others	Saccharides and Alcohols	488-81-3	3	107930	101740	66210	65350	92826	89734	69782	79903	76359	109640	86875	92647	214570	254830	229440	292790	344550	290830	288090	204410	263380	302680	249740	285590	179410	201640	191870	139070	117870	116710	202670	173290	155610	221970	224800	187850	119450	129050	126630
mws0438	151.06	59	152.068	C5H12O5	[M-H]-	L-Arabitol	Others	Saccharides and Alcohols	7643-75-6	3	55438	51817	37418	50484	61236	78254	41970	64366	59698	63223	64958	64228	163310	181190	162780	176360	192630	183570	187570	154280	144050	208250	146670	188840	122520	101020	122020	78709	61664	81030	114770	106060	69234	137830	156350	123700	98212	89487	121990
pmf0174	157.16	157.2	158.167	C10H22O	[M-H]-	1-Decanol	Others	Saccharides and Alcohols	112-30-1	3	3294000	3673800	3289400	4154400	4201000	4171900	4248300	4179900	4400400	4361600	4578700	4624000	3211600	3264000	3291100	3256300	3242100	3108600	3210800	3028700	3275800	3253400	3233500	3454200	3006500	2930600	3063900	2958400	2888800	3069300	2922300	3141800	3072800	2878400	2867000	2879600	3683000	3564100	3268000
mws1595	163.06	118.6	164.068	C6H12O5	[M-H]-	D-Fucose	Others	Saccharides and Alcohols	3615-37-0	3	38906	16858	19870	20550	24141	40610	29352	29592	13591	15628	26295	26163	39018	61483	32284	28168	45802	31162	40211	24104	48147	18728	40079	24431	61292	28311	44862	26313	25892	18827	24420	15034	14818	26917	33728	21286	10621	42298	35786
pme2435	163	59	164.068	C6H12O5	[M-H]-	L-Fucose	Others	Saccharides and Alcohols	2438-80-4	3	201430	126030	157570	188320	187640	159210	196230	293710	182250	121600	150380	192990	195470	175740	151270	319080	320790	255710	296080	191080	226400	186750	209290	201920	319230	322460	198430	262070	229670	252720	200950	258560	212850	197630	218220	281940	238760	304760	270990
pme2529	163.2	101	164.068	C6H12O5	[M-H]-	1,5-Anhydro-D-glucitol	Others	Saccharides and Alcohols	154-58-5	3	134280	104120	93866	158300	138480	143950	148370	156180	169150	119160	133150	146940	169800	143240	131600	173360	207040	210650	186640	175830	183150	193180	156850	180270	193470	105320	162030	126290	101380	122130	96123	121170	116640	194920	149000	179380	151630	157230	104910
mws0854	163	59.01	164.068	C6H12O5	[M-H]-	Rhamnose	Others	Saccharides and Alcohols	3615-41-6	3	193760	106770	146960	185600	160710	154990	157070	239520	149250	153830	127720	172820	92435	167180	105850	221640	306540	273730	247320	148190	229280	196460	189260	176110	237750	239660	174980	226070	175970	252970	196980	230760	182570	149930	189880	213290	204190	246430	252980
mws0344	165.04	75	166.048	C5H10O6	[M-H]-	D-Xylonic acid	Others	Saccharides and Alcohols	526-91-0	1	4853000	4125400	3714500	4418000	4342500	4746800	4186000	4587400	4132800	4521400	5131200	4451300	4183500	3877100	3962800	4612400	4978100	4412900	4287900	4411600	4565300	4310800	4240700	3844600	3417200	3265600	3817800	3417300	3127600	3359000	3514100	3699500	3238200	3409700	3531600	3393200	3647900	3595100	3774700
MWSmce165	165.08	59.02	166.084	C6H14O5	[M-H]-	L-Fucitol	Others	Saccharides and Alcohols	13074-06-1	2	524740	364170	410360	568030	482980	558020	501220	511920	491630	502480	580560	547130	417520	480060	470750	527760	687270	617310	576260	464640	497140	549870	536880	506730	504630	413470	388220	477170	373210	408860	416230	465960	373060	462230	488790	415540	422890	432930	399830
Zmzn000078	168.99	78.96	169.998	C3H7O6P	[M-H]-	Dihydroxyacetone phosphate	Others	Saccharides and Alcohols	57-04-5	2	408450	339710	372870	340140	417280	348480	323560	475150	384710	161770	216360	324440	157970	233260	163030	251210	245990	305310	323480	242340	287500	213180	307980	268710	160630	172640	178880	190900	283810	257320	247130	168080	238250	213920	130850	198640	223920	255940	231850
mws4175	175.02	85.03	176.032	C6H8O6	[M-H]-	D-Glucurono-6,3-lactone	Others	Saccharides and Alcohols	32449-92-6	3	63213	34890	33746	149430	144990	86760	109000	83541	87929	54311	42962	26584	30577	48976	49966	102120	87074	111340	99841	59269	82428	101530	134020	90970	29207	35733	64786	175000	238960	183500	281440	124580	143480	56163	30708	58422	57159	83795	48286
pme2253	177.04	59	178.048	C6H10O6	[M-H]-	L-Gulono-1,4-Lactone	Others	Saccharides and Alcohols	1128-23-0	3	95283	46655	53275	73449	82212	38659	38067	39934	45215	48145	27470	57928	111790	95250	66292	32534	47937	74728	98057	73695	108290	86596	44044	40474	46762	83109	58166	62113	57201	99252	105600	40238	54318	50466	52837	51992	63327	99224	67336
mws1164	179.06	59.01	180.063	C6H12O6	[M-H]-	D-Fructose	Others	Saccharides and Alcohols	57-48-7	2	3446000	2226900	2324100	1751600	1958600	1720700	1722100	1529900	1711200	2881900	2942000	2894200	2576400	2655000	2417400	1977700	1673100	2078200	1891600	3773600	2352700	2119300	2341600	2148900	2799100	2443100	2661000	2729300	2358700	1913700	3209000	3235900	2610200	3567800	3775900	3672500	2294300	2277800	2518300
mws4170	179.06	59.01	180.063	C6H12O6	[M-H]-	D-Glucose	Others	Saccharides and Alcohols	50-99-7	2	3428100	2069300	2525200	1559000	1682600	2191400	1733200	1691000	1582700	2345800	2808800	2589600	2418900	2772500	2369300	1765300	1369900	1987900	1950100	3792700	2176300	2084900	2086900	2324700	2567700	2310300	2512000	2659000	2349900	1863000	2928800	3686400	3023100	3398200	3457200	3143400	1890200	2209900	2195700
Hmln000297	179.05	59.01	180.063	C6H12O6	[M-H]-	Inositol	Others	Saccharides and Alcohols	87-89-8	2	3545300	2548500	2229600	1641800	1969900	1905400	1809900	1576900	1504600	2693200	2676700	2680500	2390300	2683000	2402700	1972400	1738700	2116400	1988400	3520200	2469100	2153200	2314500	2455300	3108700	2379000	2999700	2600100	2263000	2001100	3111600	3678300	2829400	3613600	3295500	3241400	2084900	1881100	2197700
pmf0138	179.06	59	180.063	C6H12O6	[M-H]-	D-Mannose	Others	Saccharides and Alcohols	3458-28-4	3	4271200	2804300	2401000	1444900	1670500	1570800	1849400	1557600	1368700	2794400	3111200	2827900	2790600	2630200	2370100	1576600	1153300	1494400	1456700	3445700	2080100	1720800	1924200	2161400	2767200	2382800	2571500	2663300	2150800	2097100	3108500	3354600	2861800	3851200	3338000	3245200	1980200	1869700	2057000
MWSmce576	179.06	59.01	180.063	C6H12O6	[M-H]-	L-Glucose	Others	Saccharides and Alcohols	921-60-8	2	3447400	2287200	2434100	1732500	1945100	1894800	1968700	1459200	1473400	2646100	3053200	2732000	2443000	2616800	2333800	1995200	1774600	1892600	1967100	3404200	2647800	2369400	2328400	2316800	3008500	2672900	2825700	2893800	2288300	2033600	3077700	3281300	2849100	3536200	3261700	3043900	2117200	2194700	2399200
pmf0139	179.06	59	180.063	C6H12O6	[M-H]-	D-Galactose	Others	Saccharides and Alcohols	59-23-4	3	2764900	1805300	2121600	1542400	1677000	1561300	1312000	1425500	1304500	1889800	2294700	2252800	2484800	2628100	2310700	1787300	1693100	1987100	1719700	2678300	1951800	2024800	1741600	1958400	2086400	1736200	2312000	2018700	1578500	1364300	2319600	2256000	2230200	2413800	2684800	2279300	1557600	1727400	1547900
mws1155	181.07	101.02	182.079	C6H14O6	[M-H]-	D-Mannitol	Others	Saccharides and Alcohols	69-65-8	3	11844	14102	16745	19978	19508	13065	10909	16553	20816	27951	11795	22190	48214	51624	39198	36467	26818	32901	35169	32463	28628	59012	22227	29021	41732	31007	35256	25816	26683	29916	37374	25826	18417	30436	23308	26216	29759	14599	16484
mws0214	181.07	71	182.079	C6H14O6	[M-H]-	D-Sorbitol	Others	Saccharides and Alcohols	50-70-4	3	35789	44125	36860	34464	44983	51232	30766	37689	30682	34812	55304	32568	68857	103670	92225	69962	113480	85133	92581	59217	79211	88831	74720	79106	62624	49273	70154	56511	47527	55824	75683	56066	72303	70439	62792	49893	48222	46365	49410
pme2237	181.07	101	182.079	C6H14O6	[M-H]-	Dulcitol	Others	Saccharides and Alcohols	608-66-2	3	80665	64927	42023	106240	53681	65847	61526	88300	54168	68309	89726	78505	112560	150900	149630	132210	172740	140850	126370	148270	116130	169410	150930	156900	131290	117330	148560	65277	84066	80369	133510	131490	86771	99263	118180	110170	90001	83063	98169
Zmgn000447	184.98	78.96	185.993	C3H7O7P	[M-H]-	3-Phospho-D-glyceric acid	Others	Saccharides and Alcohols	820-11-1	3	1912700	1623500	1448100	2061900	2056600	2217000	1978000	1991800	2047600	1504700	1852000	1876500	1156200	1645900	1188900	1778500	1989300	1700400	2122400	1930500	1924500	1431700	1539500	1431700	1189100	1159100	1090200	2350600	2458800	2368100	1529700	2737700	2090000	1796800	1736600	1576400	1778800	1905500	2216900
mws1189	193.04	72.8	194.033	C6H10O7	[M-H]-	D-Galacturonic acid	Others	Saccharides and Alcohols	685-73-4	3	162510	160080	129490	179820	143240	176990	138120	139070	159450	147060	163290	146900	264220	266900	228210	217370	275720	247470	267850	252950	278300	262480	275240	201700	190820	148650	180490	217830	169750	179160	184480	180920	193870	168020	170560	195120	141720	159660	193900
pme3705	193.04	73	194.043	C6H10O7	[M-H]-	D-Glucoronic acid	Others	Saccharides and Alcohols	6556-12-3	3	51582	70258	71272	106350	86283	92493	75490	61461	92072	70617	70009	72331	91619	95747	91118	92087	91048	87888	125180	83848	113210	80609	121710	69050	54364	67299	54156	88823	83824	89738	132590	91878	84435	89873	60857	88434	79157	69557	63106
mws2104	193.07	99.01	194.079	C7H14O6	[M-H]-	D-Pinitol	Others	Saccharides and Alcohols	10284-63-6	3	117150	97857	93074	90131	71506	66240	65960	83245	62997	66887	53435	65628	132590	147000	151460	88996	104310	131690	112610	135800	111690	131640	127190	116860	94537	66306	97534	67252	68676	86912	75536	80022	77652	92886	102000	72848	75698	72095	94100
pme0534	195.05	74.9	196.058	C6H12O7	[M-H]-	Gluconic acid	Others	Saccharides and Alcohols	526-95-4	1	1510200	1202100	1284700	2157500	2099400	2150300	2006400	2190800	1989800	1685000	1693200	1731600	1467400	1581600	1724400	2365300	2616200	2322700	2209600	1985600	1980500	2184100	2388400	1938700	1689000	1545600	1717000	2473700	2259300	2213700	2368000	2388200	2440100	1563200	1662400	1622700	1721400	1726900	1813000
Zmzn000079	199	78.96	200.009	C4H9O7P	[M-H]-	D-Erythrose-4-phosphate	Others	Saccharides and Alcohols	585-18-2	3	193950	222880	248150	238700	268380	240790	241760	202900	246810	186730	189340	335610	125380	169020	133710	126080	124990	129850	185530	128670	146570	173600	162440	128270	107900	136080	128170	184580	197430	190200	253300	224970	144750	80303	131210	131580	186910	158300	224910
pme1261	206.14	76	205.131	C9H19NO4	[M+H]+	D-Panthenol	Others	Saccharides and Alcohols	81-13-0	1	10134	120080	307710	55235	45534	80091	19746	184020	12930	8756.1	105960	17154	284130	281750	42226	10696	8785.4	17064	9696.7	331220	805100	41971	355320	780690	147050	190130	139530	90198	169530	120080	103750	110240	125890	89159	86047	138670	114570	128300	125140
Lmsn000954	207.09	59.01	208.095	C8H16O6	[M-H]-	Dambonitol	Others	Saccharides and Alcohols	523-94-4	3	366610	352210	367350	279890	271310	295900	333310	389340	325680	240230	266120	270870	262180	433690	479000	443980	434700	491350	507610	483020	495280	561790	409270	342010	501430	368790	533170	392510	349230	409320	104240	401780	423150	413820	421880	373070	475150	442050	375320
Zmpn000199	209.03	85.03	210.038	C6H10O8	[M-H]-	D-Galactaric acid	Others	Saccharides and Alcohols	526-99-8	2	943370	1024800	806740	1229500	1140100	1008400	1095200	1347800	1198000	1269700	1426900	1290500	1380400	1565100	1520500	1566500	1609000	1579700	1380900	1289800	1291600	1504000	1455700	1580400	1568200	986110	1450600	1060200	1077100	1093200	1039000	1085600	972260	1376500	1269700	1139900	1073300	1128400	1089600
Zmyn000108	209.03	85.03	210.038	C6H10O8	[M-H]-	D-Saccharic acid	Others	Saccharides and Alcohols	87-73-0	2	914120	827490	730020	1163500	1080700	1076800	1185300	1339000	1152600	1095400	1183600	1320400	1323900	1359100	1548400	1191800	1527800	1305800	1302500	1010700	1270500	1606600	1301900	1362900	1601000	924000	1339700	1028200	1045000	1025000	1188300	1082400	1056300	1282200	1107000	1114000	1078900	1041200	1091700
Hmcn000192	209.07	59.01	210.073	C7H14O7	[M-H]-	Sedoheptulose	Others	Saccharides and Alcohols	3019-74-7	2	656280	624530	483060	777950	768550	787720	804680	859390	905010	744890	895000	880370	986280	1005600	1145100	975090	1034900	989530	960350	901700	860670	1230100	954750	996400	1319900	815690	1119700	878460	814700	809260	628660	854730	820930	954280	917300	793110	767790	719420	810080
pme2755	222	144	221.09	C8H15NO6	[M+H]+	N-Acetyl-D-glucosamine	Others	Saccharides and Alcohols	7512-17-6	3	160960	196250	194300	166590	200450	171880	173570	165450	155420	178270	178460	159520	214230	175040	180270	187800	167120	193150	120800	156100	180070	169390	174090	169940	178220	182060	233100	204420	184000	194850	175900	210640	191680	218930	217590	225210	201800	176200	160450
mws2608	222.1	84.05	221.09	C8H15NO6	[M+H]+	N-Acetyl-D-galactosamine	Others	Saccharides and Alcohols	1811-31-0	3	110940	111050	134440	116330	141670	115950	94974	102210	96043	104920	118390	113360	116670	109320	157680	131960	106940	122420	93346	96658	87652	163270	191950	123640	129350	110870	146880	130400	172580	116430	111460	132760	210970	195610	166300	135400	153990	104980	106340
pma6455	229.01	96.97	230.02	C5H11O8P	[M-H]-	Ribulose-5-phosphate	Others	Saccharides and Alcohols	4300-28-1	3	110370	128630	104100	58905	74248	81326	57888	91121	94360	47220	40556	37895	82196	144350	72691	104310	183290	115960	99276	100290	98104	111640	104880	88634	88733	51524	74571	121320	85376	110680	79158	97312	122710	78631	108760	77400	90350	99055	75696
Zmyn000110	258.04	78.96	259.046	C6H14NO8P	[M-H]-	D-Glucosamine 1-phosphate	Others	Saccharides and Alcohols	2152-75-2	3	109840	66884	91907	149790	112980	161060	120540	129490	110860	94801	138380	192900	86967	123500	133410	87731	77528	80186	93038	64230	63989	94621	90346	85527	60207	62189	51637	89898	89467	83581	138730	101200	130500	51171	54524	51789	75585	82719	92692
MWS2442	259.02	96.97	260.03	C6H13O9P	[M-H]-	D-Fructose 6-Phosphate	Others	Saccharides and Alcohols	643-13-0	2	11414000	10899000	11081000	13040000	11931000	13061000	12806000	13728000	12159000	8815300	10350000	10851000	4116500	4204100	4222200	6685700	5550400	5946200	6542700	7267700	7357500	4752500	5185400	5264900	5250900	5345000	5602300	9563400	9802900	10194000	9980300	8854700	8589800	6187600	6345900	5472100	7015700	7110000	8119600
mws1090	259.02	97	260.03	C6H13O9P	[M-H]-	Glucose-1-phosphate	Others	Saccharides and Alcohols	59-56-3	2	15733000	14423000	15331000	17605000	16297000	19094000	17840000	19122000	18202000	12816000	12679000	16640000	6427300	7107900	6202900	9746700	7936600	9012600	8486200	10048000	9391500	7372800	7128900	7447900	7942500	7200800	7866400	13142000	14252000	14095000	14537000	12463000	11455000	8033600	9827900	8924900	9217900	10654000	11660000
mws0866	259.02	97	260.03	C6H13O9P	[M-H]-	D-Glucose 6-phosphate	Others	Saccharides and Alcohols	56-73-5	2	16649000	15365000	16669000	19441000	16660000	18546000	17776000	20550000	18469000	14183000	15078000	17078000	6652200	6700300	6583500	10528000	8057700	9833700	9123100	10381000	10596000	7467400	7952800	7432200	8552200	7932700	7654900	13477000	14747000	15523000	14629000	13216000	12781000	8944700	9636100	8754700	10961000	11399000	12029000
Zmpn000095	261.04	78.96	262.045	C6H15O9P	[M-H]-	Sorbitol-6-phosphate	Others	Saccharides and Alcohols	20479-58-7	3	109610	74912	111390	127250	108250	126260	126470	135290	114190	77733	106950	119050	49787	39075	47203	76006	65145	70687	77737	61602	58759	64966	40050	60057	50388	58612	50897	89077	96053	96781	99153	80483	88600	71275	57727	58115	67645	67398	72605
pmb3081	289	97	290.004	C6H11PO11	[M-H]-	Glucarate O-Phosphoric acid	Others	Saccharides and Alcohols	-	3	2588700	1330900	1576200	1165100	997990	1203800	1132000	836920	960230	1244600	1839500	1778900	2995100	2415400	2479800	1563800	1217700	1453600	1416100	2429500	2243300	1554600	1761100	1660400	1831700	2035000	1995400	1162100	1020400	916710	808140	1118800	1272700	1220900	1424700	1035000	1234300	1521500	1574500
pme3163	289	97	290.04	C7H15O10P	[M-H]-	D-Sedoheptuiose 7-phosphate	Others	Saccharides and Alcohols	2646-35-7	3	2474800	1685500	1762000	1161000	1049800	1333200	1179700	1116200	1470300	1298500	1853900	1525300	3182500	2584900	2537900	1590300	1330800	1938000	1643100	2315500	2117800	1601100	1797600	1582800	1870700	1739900	1926700	1267600	1018700	1158500	853010	1063500	1303700	1098800	1641500	1224600	1437900	1413900	1616200
pmb3079	300.05	96.9	301.056	C8H16NO9P	[M-H]-	N-Acetyl-D-glucosamine-1-phosphate	Others	Saccharides and Alcohols	6866-69-9	3	133390	111470	96467	144510	165020	133320	122730	113220	134420	99577	104040	120700	75594	114260	119840	177950	205070	146540	122730	169510	206640	136590	122810	107060	103700	94955	95918	105100	121680	109640	52618	121660	90196	86326	77150	63588	165890	108710	161300
Lmqp006559	330.34	312.33	329.327	C20H43NO2	[M+H]+	2-Amino-1,3-eicosanediol	Others	Saccharides and Alcohols	-	1	2057400	1290100	1712100	1895400	1935700	1936600	1957700	2419100	2287200	2147100	2122500	2191300	2021600	2403100	2456900	1909000	2219400	2073500	1930500	1992600	1995000	2325400	2482900	2282500	2025400	2105000	1844000	1326400	2193500	2123100	2060500	2007300	2030900	1964500	1700600	2212000	1206600	1470800	1478500
Lmqn000432	333.06	333.06	334.067	C9H19O11P	[M-H]-	1-(sn-Glycero-3-phospho)-1D-myo-inositol	Others	Saccharides and Alcohols	-	1	458710	461450	650530	967910	745240	1143500	781100	797480	705450	372820	325840	1427300	232920	1036000	968740	802970	846310	605860	710810	490930	755050	561770	914630	672310	421790	244300	309080	954950	972200	834640	79643	707210	957010	293830	346210	277860	820560	744370	500230
pme3311	339	97	339.996	C6H14O12P2	[M-H]-	D-Fructose-1,6-biphosphate	Others	Saccharides and Alcohols	488-69-7	3	128120	138640	160060	79243	105710	92733	107580	86207	100110	59376	73193	94349	45930	76361	65037	81100	85603	62387	114530	97590	117500	85927	96046	70422	47267	56639	65519	40971	53118	57433	28825	26756	65799	62355	60691	62053	60012	86777	91397
Zmyn000083	338.99	78.96	339.996	C6H14O12P2	[M-H]-	D-Glucose 1,6-bisphosphate	Others	Saccharides and Alcohols	10139-18-1	3	96909	111660	103080	115390	130580	138180	120210	152390	106060	79236	65695	86602	42510	44126	47055	78860	93178	83215	113880	87248	91614	76106	99528	67334	37929	34176	43703	53261	59883	54819	44682	40117	61975	45638	57573	39582	61923	65862	82893
MWSmce203	341.12	73.03	342.116	C12H22O11	[M-H]-	D-Cellobiose	Others	Saccharides and Alcohols	528-50-7	3	111460	95707	120190	64126	77806	72881	84373	67227	64876	122400	88883	83220	58156	80896	77901	72397	56132	58926	57890	74836	60667	62526	67616	71620	80164	75383	131940	82839	68556	83566	107180	101840	77061	80038	100380	82140	75674	70426	99890
mws1333	341.11	113	342.116	C12H22O11	[M-H]-	Melibiose	Others	Saccharides and Alcohols	585-99-9	3	2252100	1967700	1847000	1617000	1522000	2109800	1770400	1826300	1970700	2208600	1929800	2933200	1172500	1207600	1318300	753210	482060	806340	823660	948840	913680	1081200	1148100	1010300	2028400	1799100	2685400	2215800	1441600	1627900	1886700	2084400	1831000	1948100	2136700	1751800	1762800	1594200	1490500
pme0519	341.11	119.03	342.116	C12H22O11	[M-H]-	D-Sucrose	Others	Saccharides and Alcohols	57-50-1	1	4715800	5242200	5007300	5633700	4577300	4478700	4189100	4080900	4269700	5953600	8101400	5763800	1982300	2586900	3389500	1296800	1046000	1087100	1696500	1898900	1974300	2094700	2420900	1939100	6443800	4306300	6370100	4913600	4282700	3698500	5938000	3730900	4097700	6321700	5651400	4882700	3053000	3317900	3543500
Lmsn000381	341.11	89.02	342.116	C12H22O11	[M-H]-	D-Maltose	Others	Saccharides and Alcohols	69-79-4	1	4361200	3043900	2519500	2315500	3276800	2754000	3710300	3336700	3409200	3197700	3455200	3430400	2158300	1362900	3470600	1401700	1025300	854190	1386400	2225700	1268300	1939900	2508100	2438000	4427000	4650400	2724100	2648500	3056500	5035300	4899300	4417100	4003300	3781900	4274800	2079000	3391700	3631100	3986700
mws1080	341.11	179	342.116	C12H22O11	[M-H]-	Galactinol	Others	Saccharides and Alcohols	3687-64-7	1	17193000	14075000	14602000	11803000	10844000	13340000	12624000	10875000	12653000	16963000	15289000	17711000	7023400	7563300	8544500	5722500	2791200	5582400	5004300	5513100	5987300	7495200	7197800	8040800	15775000	14550000	16335000	12263000	12441000	13006000	15034000	12862000	12001000	13986000	14742000	13892000	8873200	9545300	10636000
mws0264	341.11	119	342.116	C12H22O11	[M-H]-	D-Trehalose	Others	Saccharides and Alcohols	99-20-7	3	3202600	1911400	1393300	1660700	1888600	1611400	2279200	1077700	2340700	2696500	2461400	1584400	1302900	975820	952480	839360	559030	1008800	973010	902740	1104800	1197400	1161900	1142900	2951300	1946000	1723200	1782600	1542600	1419900	2128000	1610700	1938500	2193500	1954000	2122800	1137500	1616600	1707300
mws5038	341.11	89.02	342.116	C12H22O11	[M-H]-	Isomaltulose	Others	Saccharides and Alcohols	13718-94-0	1	4272800	7156700	4468700	2742600	2712100	3387900	3725300	3906600	3780500	5415300	5421200	4677000	2979300	2339900	2697600	1769300	982120	2053000	1894000	2808200	2394600	1947800	2203400	2376500	5398200	3616200	4448500	2735100	2749300	5309200	7399900	3705800	4518700	3161500	5985600	3675500	2818200	4857900	1624000
MA10039641	341.11	89.02	342.116	C12H22O11	[M-H]-	Lactobiose	Others	Saccharides and Alcohols	63-42-3	1	4638100	4934700	4670300	3704300	2506700	3353900	4750500	4147100	4513600	4553800	5300700	4928400	3431900	2512100	2764200	1873000	798780	1925800	2482900	1914200	1641300	2811500	2463700	3571900	5433700	3090400	4505800	3836100	2627500	4241400	6548100	3819600	5087800	3543700	5168600	4197000	3188100	4850600	2092400
MWS1983	343.12	89.03	344.132	C12H24O11	[M-H]-	Maltitol	Others	Saccharides and Alcohols	585-88-6	3	95310	92046	90383	92952	84066	73305	60880	92668	84528	139330	87373	97447	103020	112660	93717	101360	109020	102910	106150	99010	81753	99470	84406	124300	83347	113630	133860	123250	100900	104840	105640	133240	105350	108550	119320	109080	91678	70942	91467
mws2523	421.08	241.1	422.083	C12H23O14P	[M-H]-	Trehalose 6-phosphate	Others	Saccharides and Alcohols	4484-88-2	3	197550	173950	170720	140840	132480	148020	140720	148620	136730	129500	151860	169310	98872	96672	77412	81003	64223	69341	79449	107260	97164	81418	97862	78818	126730	127620	134000	138040	136330	129490	151050	128260	130710	104490	154740	125550	114710	103640	124250
mws1089	421.1	241	422.083	C12H23O14P	[M-H]-	Sucrose-6-phosphate	Others	Saccharides and Alcohols	-	3	122640	110500	145290	106170	82123	97719	104680	83443	91394	59678	115550	124620	64656	51180	66665	34634	44739	42839	53444	48657	69592	54020	45354	44692	111680	74694	94022	115420	83700	123710	14285	86497	78143	51058	84292	62183	69637	88124	64027
Lmmn000214	487.17	341.11	488.174	C18H32O15	[M-H]-	Solatriose	Others	Saccharides and Alcohols	528-40-5	3	1537900	1587200	2206900	3442600	2396800	3680800	3357200	2969800	3402500	1785200	2042500	2539600	382920	242020	383440	725020	399910	628320	726520	841280	818300	460820	1184200	644840	1506900	1074400	1009600	2037000	1720100	2280500	1885500	1499200	2150700	1136600	942180	1095000	1170100	1358700	1250300
MWSmce486	503.16	383.12	504.169	C18H32O16	[M-H]-	Manninotriose	Others	Saccharides and Alcohols	13382-86-0	2	13162	14856	17254	10721	26373	7041.7	10887	10522	14044	17042	18658	15879	16933	18878	22573	24281	21812	17357	18993	17601	19953	23155	20116	10201	23142	10356	23635	19299	13468	13514	28897	15945	19033	20536	24505	18931	13669	12696	19666
pme2125	503.16	179	504.169	C18H32O16	[M-H]-	Raffinose	Others	Saccharides and Alcohols	512-69-6	3	170930	173750	233060	91845	142780	128640	148680	143870	143740	376720	288140	328120	119990	133810	152360	71741	78180	92466	72979	72436	114300	203250	93155	188170	269120	354050	316280	268890	160710	120440	361000	227400	222580	263610	296410	229840	167710	216000	155810
pme0500	503.16	323	504.169	C18H32O16	[M-H]-	D-Melezitose	Others	Saccharides and Alcohols	597-12-6	3	20311	30854	46245	22984	20730	22237	16814	11794	20676	39156	44980	33786	20835	24490	16762	17206	11166	12425	16721	22194	10225	18124	20612	22312	28574	27408	21366	17857	11118	24779	25768	14249	20230	37387	30774	31020	25932	23257	19558
mws1589	503.16	179	504.169	C18H32O16	[M-H]-	D-Panose	Others	Saccharides and Alcohols	33401-87-5	3	28906	56705	33331	22206	33811	30205	31363	35903	22496	88676	51159	63704	44953	36254	36466	24320	36021	21184	24363	32144	26579	29178	29421	45359	91814	50126	73575	25444	18632	46160	105060	49950	59600	75547	56952	61762	44950	40546	40192
MWS0442	527.16	365.1	504.169	C18H32O16	[M+Na]+	Maltotriose	Others	Saccharides and Alcohols	1109-28-0	3	23645	15400	12726	24132	9324.8	11532	14781	23618	12616	16733	19242	18124	31314	12167	17601	25814	20360	31322	11551	20880	15408	28014	29698	28613	27500	24743	44589	28015	29654	34079	34649	42363	20367	32995	26454	45651	16449	24749	14847
pmb2653	649.1	145	650.227	C24H42O20	[M-H]-	DMelezitose O-rhamnoside	Others	Saccharides and Alcohols	-	3	84446	97393	175900	154850	139780	186900	174020	131430	126150	164970	195050	252380	18824	17422	25647	34737	43773	48852	37225	58278	44509	43290	67899	36456	110550	98423	125450	163600	192110	161270	180400	114970	119880	107910	68061	102550	104780	101100	91075
Lmqn000213	665.21	341.11	666.222	C24H42O21	[M-H]-	Stachyose	Others	Saccharides and Alcohols	470-55-3	3	6566.2	7665.4	10177	4489.5	8533.3	10989	5397.3	8223.5	7602.6	13835	9067.4	11544	8723.2	15532	13971	8518.6	6546.9	5516.5	10575	4824.9	7224.1	15244	10493	9784.3	20621	23863	23297	17092	14458	11635	18417	17209	12350	23601	23037	25420	12936	10030	7781.1
pme1841	103.12	86.1	102.116	C5H14N2	[M+H]+	Cadaverine	Alkaloids	Alkaloids	462-94-2	3	480230	1050400	1291900	700950	802580	762490	907600	717500	704000	378790	507770	499010	156220	147530	176860	120490	106510	109020	165660	190950	159960	111340	121060	93100	153640	280070	357570	313690	392510	367550	319660	262750	277170	77549	65350	17683	309410	346370	365220
pmb0484	104.1	60.1	104.107	C5H14NO+	[M]+	Choline	Alkaloids	Alkaloids	62-49-7	3	25670000	29108000	28143000	28369000	30343000	27167000	29339000	27344000	27017000	24930000	26051000	25897000	25596000	25426000	23050000	23985000	23365000	24117000	23681000	25925000	26080000	21425000	25333000	22930000	18874000	18513000	18750000	20612000	21388000	22965000	20831000	20280000	20350000	16073000	16835000	16978000	22195000	22565000	21712000
pme0066	116.1	74	117.054	C3H7N3O2	[M-H]-	Guanidinoacetate	Alkaloids	Alkaloids	352-97-6	3	28538	17536	8663.3	23298	29851	28266	26275	31796	20241	26885	32070	32496	19599	25119	25986	28094	38475	34034	42526	35466	40139	31107	42809	37649	30127	25399	27211	39149	35579	37601	39772	32797	37488	47637	40882	50777	27643	33779	32465
MWSmce548	118.09	58.07	117.079	C5H11NO2	[M+H]+	Betaine	Alkaloids	Alkaloids	107-43-7	1	1016100	708290	632280	1231200	1260800	1044100	1153700	1269800	1041600	780080	776410	711550	1007800	1068700	956370	1029600	1016400	925410	950760	997570	976230	879990	832000	740190	741800	603870	633960	1206200	1178100	1217700	1007900	954610	4001900	611980	575620	636010	1027000	955450	906650
pmp001287	120.08	103.05	119.073	C8H9N	[M+H]+	N-Benzylmethylene isomethylamine	Alkaloids	Alkaloids	-	1	5562500	5729300	4974300	5966200	5983300	5822800	6013900	5725800	6111400	4176500	4640600	4908000	6235700	6603600	6301300	7241600	7587700	7150200	6683600	7103300	6263200	6125600	6300800	5055900	3698000	3323900	4287400	5729100	5153600	5424700	5050000	5012700	5243500	4754100	4518900	4766900	5652300	4962700	5112100
mws0491	122.1	105	121.089	C8H11N	[M+H]+	Phenethylamine	Alkaloids	Alkaloids	64-04-0	3	887500	917140	912170	668050	899290	808600	756540	590360	734560	1305600	1140200	1003400	1439200	1783400	1678300	1127600	1071600	1182200	1527100	1570300	1395700	1524800	1257500	1609200	735160	1734300	1383400	920510	1027500	892510	962470	817450	942080	1407100	1331100	1507500	1081300	1181100	1078500
pme2693	131.12	114.09	130.111	C6H14N2O	[M+H]+	N-Acetylputrescine	Alkaloids	Alkaloids	18233-70-0	3	478790	451710	874950	1462100	979550	1089300	1326600	1211700	1262100	1117300	918110	1349000	307500	363050	353490	324940	363570	361390	434660	300030	394800	331640	410850	269100	665100	892410	501410	976590	1428000	868060	437940	928700	453610	410270	356270	450550	612350	699990	613700
Lmxp000939	136.06	119.04	135.054	C5H5N5	[M+H]+	Zarzissine	Alkaloids	Alkaloids	160568-14-9	1	5515500	5971400	7170300	9613000	8978400	7870200	8498200	8087700	7961100	6173300	5837600	6871800	4046600	4175900	4650900	5970400	7014700	6005800	5683300	4592800	5660700	4981200	5129000	3846100	5283500	5175300	4101400	5207100	5965700	5706500	4545900	4834000	4130400	3080400	2667300	3054300	5681100	5400600	5067900
HJKP000649	136.07	91.05	135.068	C8H9NO	[M+H]+	N-benzylformamide	Alkaloids	Alkaloids	6343-54-0	3	733310	551470	460690	639600	405770	457400	499500	384460	379090	530990	413300	893480	723830	856740	642500	1242500	794950	654130	1091900	915300	627370	574300	806880	309450	247210	253940	267180	275630	249910	126340	187790	223210	179880	128230	148060	137620	433770	363220	343060
mws0704	140.01	78.96	141.019	C2H8NO4P	[M-H]-	O-Phosphorylethanolamine	Alkaloids	Alkaloids	1071-23-4	3	18869	31842	28473	88776	133100	59249	57363	62372	41374	21953	27115	25464	95437	111310	103000	364610	644610	404960	268310	128410	205670	66764	48772	53731	187050	180260	212230	126540	133640	123740	161820	143070	139920	132140	140520	135230	122670	122670	134360
pma2987	142.1	124.09	141.09	C6H11N3O	[M+H]+	Histidinol	Alkaloids	Alkaloids	501-28-0	3	8706000	7224300	7981700	6931700	6659400	8125900	6759700	7005300	7620100	8068500	8169900	7676900	8194200	8523600	8164400	8678900	8929900	8771700	7212200	7725000	7258400	7688500	8153700	8884800	9521400	8953500	9521100	8193800	9272800	10240000	9969900	10020000	9587200	10383000	10088000	10079000	6525900	7951600	8224900
Lmcp000611	144.08	84.06	143.069	C5H9N3O2	[M+H]+	2-Amino-4,5-dihydro-1H-imidazole-4-acetic acid	Alkaloids	Alkaloids	69098-41-5	2	1451900	1055500	953070	894330	973750	825480	950710	878620	804460	1102100	1050500	779690	1402500	1338900	1661300	1096700	1120300	1226000	1155200	1055300	1102500	1343100	1082400	1257100	1726500	1426100	1832300	1279300	1434100	1366600	1331400	1139500	1470900	1431900	1509200	1649200	1076500	1018900	1056000
Lmxn006423	150	122.01	151.009	C7H5NOS	[M-H]-	2(3H)-Benzothiazolone	Alkaloids	Alkaloids	934-34-9	2	24850	14362	36196	44844	36236	22411	28361	29135	34090	40132	25254	41287	24753	24353	18726	28838	17653	28376	17078	26540	32839	30680	24210	25092	29981	42807	25798	33620	30076	32432	23778	19124	17352	19204	24470	27657	27086	31119	23426
mws1346	162.08	98	161.069	C6H11NO4	[M+H]+	DL-2-Aminoadipic acid	Alkaloids	Alkaloids	542-32-5	3	120300	71862	75113	92580	105430	86870	84228	85927	67028	142960	138630	135980	184580	152620	173950	137130	126060	99798	155700	105690	127530	117410	106830	105580	144780	180770	143550	141780	146210	145070	153050	169650	111020	143100	158440	163090	137640	146950	89938
mws0352	179.06	164	180.065	C7H8N4O2	[M-H]-	Theophylline	Alkaloids	Alkaloids	58-55-9	3	43640	52226	54327	40568	20679	41280	26189	20651	31941	62653	51750	60275	36815	42348	31841	46349	57045	42078	41260	34134	31459	37767	28626	24332	34144	29502	28601	25883	31197	26679	26507	28129	29781	18451	20898	30855	36959	40081	34665
Lmcp001538	181.07	138.07	180.065	C7H8N4O2	[M+H]+	Theobromine	Alkaloids	Alkaloids	83-67-0	1	2404500	2341400	1796800	1978100	2171600	2093700	2080600	1956600	2120800	2601900	2317100	2561100	1520800	1954600	1889300	1910400	1969300	1911400	1973700	2149700	2357400	2714600	2435000	2543800	2373900	2533300	2529300	2263200	2442400	2011100	2617800	1864300	2482700	2362500	2034100	2450800	1858700	2140300	2361100
pmb1754	184	125	184.073	C5H15NO4P+	[M]+	O-Phosphocholine	Alkaloids	Alkaloids	107-73-3	3	91926	129510	155200	146610	121100	94147	122140	159470	133450	120520	117480	116100	165870	100910	77634	68632	122220	61908	112080	132310	148970	112100	78264	99422	130050	125050	109720	97037	96056	98668	104790	113090	86730	111490	123830	102660	129200	130470	103640
Hmgp002327	188.07	118.06	187.063	C11H9O2N	[M+H]+	3-amino-2-naphthoic acid	Alkaloids	Alkaloids	-	1	35572000	29864000	27672000	15702000	15750000	15640000	15090000	12700000	16024000	23317000	23218000	23710000	34557000	30944000	38412000	16603000	17709000	17434000	18744000	18543000	18249000	18642000	17630000	20980000	25305000	24160000	29579000	14865000	11382000	10612000	15191000	11134000	14518000	21984000	22718000	22206000	19475000	18892000	16678000
mws2218	195.09	83.06	194.08	C8H10N4O2	[M+H]+	Caffeine	Alkaloids	Alkaloids	58-08-2	1	7994800	7199300	7046400	6958900	6645200	7021200	6892900	6815000	6974100	7648600	7055400	7612300	7549100	8048100	7862400	7422500	7600200	7365200	7540200	7258900	7649500	8016100	7175800	7094200	7671100	7588900	8010500	7612200	7754300	7633700	7579500	7750800	7576100	7489100	7464000	7804600	6447200	6891400	7289600
mws0018	203.22	83	202.216	C10H26N4	[M+H]+	Spermine	Alkaloids	Alkaloids	71-44-3	3	12337000	13950000	16216000	13107000	11361000	12568000	12470000	12572000	11712000	12413000	15126000	11830000	14112000	11727000	12808000	13626000	11531000	13778000	11308000	13370000	12124000	13809000	13475000	14767000	15232000	15065000	16053000	13059000	13290000	13259000	15879000	16494000	14498000	14542000	14799000	14264000	12707000	14536000	12726000
mws1383	243.09	145	242.08	C12H10N4O2	[M+H]+	Lumichrome	Alkaloids	Alkaloids	1086-80-2	3	43632	36232	17675	37851	42374	27859	39881	59152	38989	44045	47452	50684	62202	73500	62279	30396	44075	31018	61226	44078	37926	51918	40366	37186	24038	32264	34417	29625	47580	41077	45254	31791	32880	43464	54787	46153	36994	36474	64798
Zmzp005934	284.3	102.09	283.288	C18H37NO	[M+H]+	Stearamide	Alkaloids	Alkaloids	124-26-5	3	20940	21608	42055	10278	43820	22429	27508	32623	32051	26306	30092	29368	19793	19361	13724	17616	18476	24845	23686	20987	16842	17865	22922	26989	27722	17910	19372	24481	23845	19224	18410	25079	20914	20601	22492	27268	17221	24611	19693
mws1375	304.15	185.09	303.143	C12H21N3O6	[M+H]+	Nicotianamine	Alkaloids	Alkaloids	34441-14-0	2	124440	122010	107980	265860	221210	233590	294410	240420	279670	120370	151600	198960	45998	56988	35485	109530	164260	165190	145600	88124	105890	99698	100820	82171	46035	49606	43272	145640	120820	192300	143500	142810	147400	35783	32118	39967	83946	123300	128180
mws0983	326.31	62.06	325.298	C20H39NO2	[M+H]+	N-Oleoylethanolamine	Alkaloids	Alkaloids	111-58-0	3	153810	103100	104120	137580	177530	100770	147270	104960	72108	83546	102550	76100	123250	128950	119740	101410	93844	84645	85542	127030	109610	107990	123320	101200	88285	86867	78254	70144	93217	106250	67270	72993	73363	65454	70385	67648	72464	111940	107060
pmb1912	474.17	327	473.166	C20H23N7O7	[M+H]+	10-Formyltetrahydrofolic Acid	Alkaloids	Alkaloids	2800-34-2	2	1953800	1493400	2236800	655670	642640	539290	619470	1050700	739170	511140	632540	651090	2166800	2082300	2756300	672970	670010	703520	513420	553970	503310	543240	583530	303300	1060300	1160000	1182200	382890	347700	447560	457260	405140	408030	211030	216820	193660	791430	983900	906550
pmn001700	455.35	455.35	456.36	C30H48O3	[M-H]-	24,30-Dihydroxy-12(13)-enolupinol	Terpenoids	Triterpene	-	2	22615	14956	25020	26048	22581	12993	21539	26848	26798	28668	38591	13562	19095	17522	23247	20391	19984	20307	20252	8164.9	17447	17849	18075	23305	20611	22622	23062	21889	15640	31343	15635	27702	26186	21966	25325	18192	23821	21725	14354
HJN110	455.36	455.36	456.36	C30H48O3	[M-H]-	Betulinic acid	Terpenoids	Triterpene	472-15-1	2	4985.5	1447.6	4475	4135.7	7674.6	3599.1	5754	5428.8	6973.2	3299.9	5660.4	2493	3162.8	4069.6	3178.6	5509.8	3339.9	3384.2	5399.8	3424.4	5102.2	3472.1	3491.5	4099.3	6095.2	5412.4	4756.1	3886.3	3858.4	7355	5164.2	4077	4961.3	2689.3	3801	4017	12571	7306	6323.4
Lmmn009932	469.37	469.37	470.376	C31H50O3	[M-H]-	Ambolic acid	Terpenoids	Triterpene	13878-93-8	3	33239	30431	27296	26702	27551	22118	28763	24661	28073	25322	26716	26855	25125	22319	22375	26894	28602	24551	30186	24465	21872	28372	30737	33508	31070	28386	26965	27001	22804	18416	20428	19052	20883	17872	17752	19490	21453	18809	23499
Zmpn008194	471.35	471.35	472.355	C30H48O4	[M-H]-	Corosolic acid	Terpenoids	Triterpene	4547-24-4	3	33930	19599	11545	53925	45100	58678	49861	62247	39361	31295	82973	34563	9	9	9	9	9	9	9	9	9	9	9	27726	59896	9	9	9	12301	22649	23042	9	9	9	9	9	24707	18582	14966
Hmbn005207	471.35	471.35	472.355	C30H48O4	[M-H]-	Hederagenin	Terpenoids	Triterpene	465-99-6	3	34774	16306	21757	55488	42539	55186	45877	58108	39958	40277	79517	37009	9	9	9	9	9	9	9	9	9	9	9	9	68134	9	9	9	16608	21331	27773	9	9	9	9	9	16976	18170	20702
Smpn011792	471.34	471.34	472.355	C30H48O4	[M-H]-	2,3-dihydroxy-12-ursen-28-oic acid	Terpenoids	Triterpene	-	3	30201	17845	18216	52198	35018	59080	36247	55770	39050	40410	87680	36771	9	9	9	9	9	9	9	9	9	26139	9	9	73709	9	9	9	16406	16980	23557	9	9	9	9	9	25400	15539	14403
pmp000269	489.36	407.33	488.35	C30H48O5	[M+H]+	Arjunic Acid	Terpenoids	Triterpene	31298-06-3	2	21063	29012	10036	4323.9	6796.6	5420.4	9792.7	9740.8	5376.1	52722	40300	48754	11919	13370	15116	8037.5	9598.7	11761	12398	31100	24941	16728	13172	27898	3487.4	27138	8702.3	11843	18281	16429	15241	4083.9	17133	37061	54172	37457	27528	23061	25770
pme2246	301	185.02	302.006	C14H6O8	[M-H]-	Ellagic acid	Tannins	Tannin	476-66-4	1	880560	1089300	1509200	1579000	829780	1103300	880330	772920	728250	1315400	646810	994310	390360	605620	332370	290450	483220	394760	325100	423770	298260	742320	410380	353540	466760	324350	168920	235650	433310	399600	343930	207540	364960	164870	202260	90264	492970	418030	788270
Lmqn004838	315.01	299.99	316.022	C15H8O8	[M-H]-	3-O-Methylellagic acid	Tannins	Tannin	-	1	7475100	5133300	8900000	12064000	13970000	12351000	11888000	11377000	13702000	8247300	7729000	7409500	9211800	9533300	7158300	8652500	10025000	8265400	9362700	5819400	8565000	9508400	8404400	7449200	11002000	10908000	13555000	7119000	9183900	8473700	12248000	8706600	10300000	3839900	4412100	4130600	6906100	9139300	8113200
Zmlp005013	331.04	299.02	330.038	C16H10O8	[M+H]+	3,3'-O-Dimethylellagic Acid	Tannins	Tannin	2239-88-5	3	10361	9434.1	3518.8	15370	17877	16961	19987	16888	13972	11046	8940.8	9626	14649	8978.9	6909.8	18781	19138	15691	10787	8369.9	16326	19094	12427	4688.9	11512	15526	8009.9	13488	11949	13283	13134	15712	17312	2613.6	4057.1	5078.2	10344	13865	10607
Zmlp007578	345.06	313.03	344.053	C17H12O8	[M+H]+	3,3',4-O-Trimethylellagic acid	Tannins	Tannin	1617-49-8	1	281130	267430	214370	345060	386050	375500	347180	363510	387730	200670	201260	177870	343160	366250	257060	515690	583820	423880	403850	321500	389670	388150	306860	259730	361150	346930	401620	233470	304500	257700	311920	223180	301410	96861	107130	86471	278620	289400	270740
Lmcn004772	399.07	233.05	400.079	C20H16O9	[M-H]-	Theaflagallin	Tannins	Tannin	102208-15-1	3	1817500	743200	472720	1656700	1735100	2379700	2448800	1584500	2178500	1461700	996610	948940	2677000	2602700	3553200	4606800	3095900	3929100	2864100	3695200	3383100	2477400	3427800	3276500	2273400	1439400	920720	2849600	2845600	3417100	3926800	3706100	3775000	2815400	2680600	2682500	1920000	1976500	1802200
Hmln003405	447.06	315.01	448.064	C20H16O12	[M-H]-	Ellagic acid-4-O-rhamnoside	Tannins	Tannin	-	3	53337	50913	47712	37042	31574	53020	46342	37332	32577	48886	36152	47673	32652	56783	47988	48880	53578	45568	30631	49749	46800	37681	57713	39036	61788	56089	49092	21804	28507	36248	30160	26168	42484	22377	40708	30659	49444	41806	27504
Zmlp005019	463.09	331.05	462.08	C21H18O12	[M+H]+	3,3'-O-Dimethylellagic Acid-4'-O-arabinoside	Tannins	Tannin	-	3	5582.8	3951.2	2696.5	16538	12510	13279	14230	17274	12144	3473.6	2626.8	14295	24335	18072	13753	50545	36452	48546	27971	34614	37502	25182	42093	29119	12284	11746	34151	43976	29622	23073	32426	34648	37399	8730.5	10227	15474	18422	24250	18751
Hmdn001667	463.05	300.99	464.06	C20H16O13	[M-H]-	Ellagic acid-4-O-glucoside	Tannins	Tannin	-	2	93699	65588	125040	113290	90862	114700	121570	150040	114960	70674	88370	66926	77988	176930	133550	115200	164840	183440	191710	101400	154410	129630	111350	106790	54896	160900	85087	86289	88213	83780	125810	172390	103260	66431	81814	54128	134760	66075	58467
pmp000273	563.15	139.04	562.148	C30H26O11	[M+H]+	Gambiriin B3	Tannins	Tannin	76236-90-3	2	34596	24126	22647	21628	9644.5	12706	18900	10432	14335	46222	28463	29406	17453	5987	9243.8	13396	17311	10351	22766	27680	11108	8148.2	3825.5	37431	2997	16558	15476	9037.5	14932	20007	7451.5	3363	6727.5	25345	5914	31704	17502	22040	24527
pmp000275	581.17	139.04	580.158	C30H28O12	[M+H]+	Gambiriin A1	Tannins	Tannin	76250-49-2	3	147610	56148	98658	405500	409540	344880	337180	372160	381910	195890	167070	148320	108010	115600	120410	178010	116120	155710	176320	190510	177830	106880	136020	120090	126330	118000	99046	200070	187050	207270	169700	242660	232880	135860	150910	140590	176370	148620	141150
Cmhn001271	633.08	301	634.08	C27H22O18	[M-H]-	Gemin D	Tannins	Tannin	84744-46-7	1	58756000	63103000	53384000	56339000	59842000	60071000	51106000	53556000	60610000	52058000	59668000	51590000	34300000	41678000	33542000	25738000	25926000	16758000	23197000	20780000	22200000	28706000	22867000	21979000	29148000	34321000	47101000	26646000	34228000	28026000	28807000	25236000	26120000	20683000	21301000	15451000	39474000	48788000	43377000
MWSslk160	633.07	301	634.081	C27H22O18	[M-H]-	Corilagin	Tannins	Tannin	23094-69-1	2	1791200	2708400	2316200	1247100	1642800	1422100	1053000	872980	1867200	1317700	1051000	2340500	581260	672830	582700	259750	389760	167210	222710	116390	179840	484620	435740	284090	489720	791250	668380	316360	568120	375960	450910	322090	280690	233680	254180	265360	587400	850240	563200
Lmyn003256	633.07	301	634.081	C27H22O18	[M-H]-	Isocorilagin	Tannins	Tannin	-	1	7508200	9723500	8085200	8317900	8336600	8188300	7661800	7660700	7768300	6889600	8571800	7682600	3441300	4189200	4161600	2119400	2665700	1900700	2189400	1671500	2065400	2904700	2467200	2158300	3283600	3726800	5047000	2711200	3912000	2404300	2758300	2884100	3258200	2042600	2206000	1751900	5131100	5440500	3882700
Wmhn003138	633.07	301	634.081	C27H22O18	[M-H]-	Isostrictinin	Tannins	Tannin	87392-62-9	3	6749300	8439100	6044200	6444600	6602500	7906800	6265300	7439500	7308800	6158800	7911400	7960400	3741700	4061900	4715100	2418500	2261800	1868600	2043200	1655500	2279900	3281000	2172200	2530500	3409800	4115300	5520200	2765100	3900600	2714700	2378500	2844100	3436300	1682400	1911200	1684000	4688700	4987100	4002100
Lmcn004686	851.15	425.09	852.154	C43H32O19	[M-H]-	Theaflavate B;3'-O-(3,4,5-Trihydroxybenzoyl)	Tannins	Tannin	152542-70-6	1	985100	1569400	2235500	2507300	2344900	2789100	2341700	1761800	2370200	3247800	3395200	3281200	388730	350960	366680	265100	324330	292770	388720	336980	346670	528900	381470	531180	626910	394240	1313800	494880	603310	499010	639200	397230	507510	1269800	1205800	1254600	1127400	1012400	966360
pmp000101	867.21	715.16	866.206	C45H38O18	[M+H]+	Arecatannin C1	Tannins	Tannin	87727-69-3	1	284410	424420	405820	338100	264460	290800	219390	265690	249370	366310	307860	386190	255730	239820	216020	119000	113070	129430	175010	201050	148530	131850	114290	112930	172370	189080	182060	99288	137060	134240	86020	125900	86248	151750	91565	131650	171750	178980	178770
pmp000100	867.21	715.16	866.206	C45H38O18	[M+H]+	Arecatannin B1	Tannins	Tannin	79763-28-3	2	288420	338670	340860	326990	366020	341000	394820	392600	306800	341440	337480	285230	422420	359010	358390	331870	383500	337300	298450	373050	360090	296380	423350	325530	321710	289990	318090	291470	313370	233550	283840	247060	293600	330600	232630	296480	225070	409750	253810
pmn001649	1153.26	1001.2	1154.27	C60H50O24	[M-H]-	Cinnamtannin A2	Tannins	Tannin	86631-38-1	2	19291	23741	21496	9146.2	14342	16950	30054	10839	13783	12750	6788.8	13572	9809.2	16359	8497	10859	8485	8556.2	8363	14022	9440.5	5417	5161.5	13877	7837.6	13933	9705.8	18074	6303.5	7376.8	15439	14716	16500	5121	9694.5	3449.2	19583	14104	6838.5
pmp000102	1155.28	867.21	1154.27	C60H50O24	[M+H]+	Arecatannin A1	Tannins	Tannin	-	3	93974	152530	114360	79024	88538	74250	62655	83416	80781	76488	102340	96443	93054	104350	61478	62546	73562	68578	80291	114630	72346	58040	57067	87715	63124	87972	69744	78108	96755	62193	71548	58984	62398	100860	81366	70509	86786	85635	87980
pmn001650	1153.26	575.1	1154.27	C60H50O24	[M-H]-	Cinnamtannin B2	Tannins	Tannin	88038-12-4	1	102960	101520	71800	93087	63400	87978	95252	94914	117750	114430	104030	110310	64960	56009	79455	44580	64358	45305	64480	66221	63716	43642	57900	53682	74645	53037	53776	83116	78350	85987	89829	66050	36674	56600	41230	72276	89698	74239	71221
pmb0864	426.26	285.24	425.254	C19H40NO7P	[M+H]+	LysoPE 14:0	Lipids	LPE	-	3	101860	107490	93666	80428	58799	87864	85105	71982	84842	84954	97570	98007	32781	30097	34846	26723	25575	33672	30602	29486	30289	37899	43268	33896	12568	14799	18119	14496	17670	15323	12202	12036	14006	17334	10008	15940	32988	44199	45732
Lmhp008337	426.26	285.24	425.254	C19H40NO7P	[M+H]+	LysoPE 14:0(2n isomer)	Lipids	LPE	-	3	13322	22180	21013	18011	19856	24905	22946	14538	22881	19368	21324	23515	6893	6555.8	9160	8197	8966.3	7850.3	8846.4	8698	9933.9	10092	11684	5298.8	2391.2	3269.2	4273.3	4158.5	4214.8	1500.4	3122.4	1863.5	3663.9	2801.2	1725.7	1651.1	8697.3	10628	9515.4
Lmhp008440	438.26	297.24	437.254	C20H40NO7P	[M+H]+	LysoPE 15:1	Lipids	LPE	-	3	30311	54937	44261	15994	23972	29885	32015	25637	26204	26552	29729	28166	20803	15982	19920	18625	12582	15039	14654	14926	16982	21364	31317	13668	5041.7	3901.5	6024.7	7504.3	8422.4	6929.5	5036.6	2976.7	4871.8	8416.7	3786.5	7088.8	13851	16913	15342
Lmhp009187	440.28	299.26	439.27	C20H42NO7P	[M+H]+	LysoPE 15:0	Lipids	LPE	-	1	52858	41461	41990	31283	29831	41890	40308	35958	38878	37175	39838	36763	18068	17707	29835	19880	16581	21151	21776	14823	14821	27884	33120	18088	10509	7337.8	12204	8388.9	13537	9858.5	10858	5640	13837	9500.5	9732.5	6350.2	22273	24575	21671
Lmhp008885	440.28	299.26	439.27	C20H42NO7P	[M+H]+	LysoPE 15:0(2n isomer)	Lipids	LPE	-	1	5682.6	11232	6186.6	7558	7993.9	10382	10536	7963	7893.5	3757.5	7674	10588	5562.9	2626.7	5743.8	5472.8	8837.6	8170.9	6827.9	4154.6	8995.2	8023	12334	4368.4	3171.8	3360.1	3283.8	1224.5	3100.2	3032.5	910.91	1884.7	2563.4	2758.7	1769.1	1332.6	7481.5	7081.3	3371.6
Lmhp009034	452.28	311.26	451.27	C21H42NO7P	[M+H]+	LysoPE 16:1	Lipids	LPE	-	3	1010300	993370	804280	409980	473170	412190	536220	420390	483260	617790	653940	611320	360630	379400	495490	251130	243810	195600	261610	180450	227510	295930	408310	228910	103600	116540	180440	103200	143750	118960	89550	70295	115210	109390	107340	121610	318520	339770	300460
Lmhp008763	452.28	311.26	451.27	C21H42NO7P	[M+H]+	LysoPE 16:1(2n isomer)	Lipids	LPE	-	3	968600	996750	848560	383250	461640	558450	542960	392690	514020	633400	636810	625530	312660	378550	481500	232810	240920	214980	259910	203150	253210	334890	401630	229140	130150	94986	194460	98705	137180	120940	109310	75846	109240	112130	101390	117680	280360	330370	316450
pmb0876	454.29	313.27	453.286	C21H44NO7P	[M+H]+	LysoPE 16:0	Lipids	LPE	53862-35-4	1	18507000	24203000	22693000	15567000	17169000	18946000	19253000	16544000	18643000	16377000	17355000	18984000	8187400	7374000	8827800	7136300	6621400	7898700	8061800	6709900	7805300	9596900	12686000	7590500	3866800	3179600	5736000	3737100	4827400	3992700	3748200	2770800	4352900	3674500	3175100	3862300	10153000	10808000	10188000
pmd0160	454.29	313.27	453.286	C21H44NO7P	[M+H]+	LysoPE 16:0(2n isomer)	Lipids	LPE	-	1	2910700	3851700	4154700	3784800	4083800	4724900	4439900	3381600	4322900	3425800	3569400	4046500	1751200	1464600	1742100	1969700	1885400	2229100	2309300	1686300	1938500	2378200	2820300	1682900	747870	569090	1123200	803470	944880	874420	659770	541430	954580	645190	568580	667220	2167900	2119200	2051400
Lmhp009769	466.29	325.27	465.286	C22H44NO7P	[M+H]+	LysoPE 17:1	Lipids	LPE	-	3	133170	152200	131290	78869	80156	104310	105970	92211	95050	99134	103510	99658	60494	51494	70731	54095	48340	51763	46608	43036	49641	60913	90134	49263	20204	16974	25110	23765	27850	23482	18954	19744	20657	21328	18596	20551	54575	59218	65507
Lmhp009464	466.29	325.27	465.286	C22H44NO7P	[M+H]+	LysoPE 17:1(2n isomer)	Lipids	LPE	-	3	115670	159030	139030	84095	103910	89227	95696	80952	95390	100760	91272	89064	58133	58797	78148	45161	48384	50428	45490	48448	54515	69350	92069	45332	19311	21690	23408	21016	22197	25807	17168	20097	24053	17118	18548	21881	53347	58580	56640
Lmhp010162	468.31	327.29	467.301	C22H46NO7P	[M+H]+	LysoPE 17:0	Lipids	LPE	-	3	7413.6	11332	13974	9461.6	10515	14265	11541	9691.7	10637	9316.3	11388	13351	4270.4	4473.7	4998.7	4422.4	5390.7	5967.6	6536.4	5711.3	8379.3	7480.1	5289.7	4105.5	4150.4	2121.2	4757.3	3893.8	3313.5	3533.8	2910.8	2264.2	3474.4	2307.9	2737.9	2780.4	6513.2	6652.2	5352.1
Lmhp008589	476.28	335.26	475.27	C23H42NO7P	[M+H]+	LysoPE 18:3(2n isomer)	Lipids	LPE	-	1	9885400	12151000	10966000	8566000	8673000	8780800	9582400	8438700	9986400	10186000	10320000	10491000	3640000	3236900	3497300	2505600	2908200	3017800	3598000	2679400	2953700	4032500	4968400	2824900	1338700	1185600	2178100	1677800	2555100	1841900	1647200	1348900	2090100	1460200	1270000	1423800	4926200	4945100	5023300
Lmhp008801	476.28	335.26	475.27	C23H42NO7P	[M+H]+	LysoPE 18:3	Lipids	LPE	-	1	9900200	12534000	11066000	8767400	8683300	9298900	10012000	8430000	8752900	9211900	9949800	10080000	3497000	3144300	3947400	2514500	2901700	2912800	3315900	2577200	2990000	3653900	4992100	2934000	1347400	1283400	2202900	1730800	2469900	1962100	1707500	1412400	2004600	1412200	1450900	1593100	4259100	4773300	5078400
pmb0874	478.29	337.27	477.286	C23H44NO7P	[M+H]+	LysoPE 18:2(2n isomer)	Lipids	LPE	-	2	12960000	12834000	14259000	8586500	9472400	11929000	10787000	9792500	10999000	9704100	9646400	10514000	4018800	3505000	5031000	3954800	3619100	3973000	4058300	3288200	3810900	4553400	6035700	3603700	2637400	2130100	3625700	3013200	3254600	2804200	2531600	2117900	3057300	2235300	1924300	2635600	5463500	6014200	5785900
pmb0881	478.29	337.27	477.286	C23H44NO7P	[M+H]+	LysoPE 18:2	Lipids	LPE	-	2	12733000	13077000	14725000	8542600	9122600	11580000	11579000	9548700	10949000	9985000	9462300	11348000	4168300	3476400	5345600	3913300	3595500	3970100	4169900	3353000	4028200	4509000	6177400	3622900	2742200	1965900	3591200	2687000	3264400	2785300	2386800	2269400	3252700	2226100	2047100	2648700	5404900	5990500	5876600
mws0289	480.31	339.29	479.301	C23H46NO7P	[M+H]+	LysoPE 18:1	Lipids	LPE	89576-29-4	3	3844600	4323300	4785000	2674400	3211400	3490100	3365100	2871100	3127800	2676600	2848700	2889800	1889000	1745900	2548100	1745100	1596900	1972200	1778100	1424800	1743600	2289800	3158000	1659400	836130	624920	1250000	892430	1364300	1011900	780140	774540	1036900	737880	703180	857420	1953700	2152900	1899700
pmb0856	480.31	339.29	479.301	C23H46NO7P	[M+H]+	LysoPE 18:1(2n isomer)	Lipids	LPE	-	3	677740	741870	929710	679500	807350	918560	815740	741400	748320	642280	643040	677320	544940	510150	662800	562160	535760	663640	571970	467840	577320	646730	870670	466530	504350	510850	600200	508090	626330	510190	531300	492810	613120	495800	440780	560900	572650	642440	583830
pmb0880	482.32	341.31	481.317	C23H48NO7P	[M+H]+	LysoPE 18:0(2n isomer)	Lipids	LPE	-	3	47382	52896	62616	34507	40713	43587	45240	42277	45614	35911	39207	43580	26184	22742	29059	22474	21459	25712	20666	21036	22550	27370	39999	19961	11035	12671	10339	11428	13063	10583	10619	7134	10934	5922.3	7991.3	10705	24066	28789	26519
pmb0883	482.32	341.31	481.317	C23H48NO7P	[M+H]+	LysoPE 18:0	Lipids	LPE	69747-55-3	3	55690	88169	104530	61038	54699	64770	70590	59856	66225	68128	64673	80893	31085	31456	38886	33807	34213	43701	41306	27234	33311	37373	50149	39820	19665	14459	27489	18611	30425	19385	19901	17286	23459	17863	14737	22010	39584	47813	43359
Lmhp009802	504.31	363.29	503.301	C25H46NO7P	[M+H]+	LysoPE 20:3(2n isomer)	Lipids	LPE	-	2	29321	33627	43395	21570	26715	29302	29834	31927	25784	24054	26231	27892	12852	10928	10264	8775.1	7185.1	10662	10024	10657	12254	12724	19788	12855	5218.1	4780.6	5625.9	5752.8	9024.4	5249.4	3589.9	3839.9	5705.2	3349.3	5288.9	6621.6	15151	18058	15133
Lmhp010040	504.31	363.29	503.301	C25H46NO7P	[M+H]+	LysoPE 20:3	Lipids	LPE	-	2	27326	27307	42939	27110	28544	33957	32512	27494	32868	34010	27166	27141	11288	8850.5	10440	9445.3	8266	9433.8	10115	9999.9	9536	14950	21195	10855	2630.6	3865.5	7373.9	6293.9	7210.5	4616.5	3906.7	4300.6	6793.6	6412.4	3410.5	5749.6	14777	14308	12222
Lmhp010514	506.32	365.31	505.317	C25H48NO7P	[M+H]+	LysoPE 20:2(2n isomer)	Lipids	LPE	-	1	5669.1	5822.3	10609	5538.2	9598.4	10915	11714	8846.4	12655	4309.7	6125.8	8949.5	4312.4	3282.5	4235.8	3593.1	2725.6	2206.4	3581.2	2252.2	3384.4	2494.5	7184.9	2702.2	2043.1	2476.4	3361.5	3012.3	1964.2	2723.4	2706	2039.8	2409.8	2038.6	1626.1	1505.6	4415	4755	3189.4
Lmhp010757	506.32	365.31	505.317	C25H48NO7P	[M+H]+	LysoPE 20:2	Lipids	LPE	-	1	27151	36874	53134	33122	29745	36366	33841	35626	33059	18800	23982	26244	12974	7713.4	15052	8338.4	8674.3	13590	10868	8931.8	13342	11023	24775	8880	6802.3	7313.3	8325.5	6258.1	6846.9	5466.4	5873.4	4121.1	7550.4	4292.2	4642.6	4708.2	16660	16245	15563
pmb0862	440.28	184.07	439.27	C20H42NO7P	[M+H]+	LysoPC 12:0	Lipids	LPC	20559-18-6	3	16926	10567	11934	5677	8289	5638.9	9950.5	10032	4238.1	26584	28085	21976	11356	5080.2	12148	9048.3	8250.7	10557	9420.9	12823	9095.8	12516	14671	19289	7081.3	14415	19356	6381.8	9025.5	11178	10719	8689	12633	24246	27107	40383	13973	10046	11120
pmd0130	468.31	184.07	467.301	C22H46NO7P	[M+H]+	LysoPC 14:0	Lipids	LPC	20559-16-4	1	531850	542460	469430	344950	332410	377640	444950	345550	360010	461540	446130	448790	236140	174190	201910	157970	184240	221130	206100	184580	230390	234790	299000	193600	83676	74102	114880	86393	107400	88685	97476	68755	97532	87361	84797	103060	219760	255200	241020
pmb2260	480.31	184.07	479.301	C23H46NO7P	[M+H]+	LysoPC 15:1	Lipids	LPC	-	2	247830	414950	355460	164500	166310	201230	248390	196960	206830	236830	220220	228400	242400	184170	242720	190820	165600	222130	202580	179930	193720	219150	325640	167250	43932	32827	71346	55329	62389	55215	50231	38778	51648	53212	45454	51037	141810	141580	164640
pmb2319	482.32	184.07	481.317	C23H48NO7P	[M+H]+	LysoPC 15:0	Lipids	LPC	108273-89-8	1	199660	276760	224930	146490	158430	159660	185230	120810	169010	134480	139250	132170	138820	105510	160380	122330	127800	158960	126380	114360	118510	141580	196090	116620	65198	40246	96252	65294	60470	67759	51416	59928	85719	60508	54319	60883	103320	129350	126370
Lmhp009129	482.32	184.07	481.317	C23H48NO7P	[M+H]+	LysoPC 15:0(2n isomer)	Lipids	LPC	-	1	28222	41224	34488	36181	37708	56033	34737	42015	33114	37418	36461	48354	38553	38518	46616	31680	44750	58365	47183	31005	34119	37566	50820	40909	17010	8542.1	12147	15278	13938	13317	16616	11717	17485	11473	12073	18116	23136	21134	14798
pma1303	492.31	184.07	491.301	C24H46NO7P	[M+H]+	LysoPC 16:2	Lipids	LPC	-	1	376780	467780	385640	206760	194150	262820	286670	215070	248340	300880	299400	332700	135750	121810	147340	135820	156680	170550	139390	103750	124620	115860	167600	113400	42538	34336	61474	46658	49711	49531	50736	39064	52741	41903	40156	52038	141720	149570	149700
pmb0863	492.31	184.07	491.301	C24H46NO7P	[M+H]+	LysoPC 16:2(2n isomer)	Lipids	LPC	-	1	373700	485720	410270	225220	203020	257180	260110	200190	248820	284990	274730	303160	133260	128870	142390	139750	153740	142780	145010	117010	126840	153940	180600	114830	41167	32304	64142	56092	47390	38827	47377	38157	53817	47800	46198	51447	128330	142540	148190
Lmhp008833	494.32	184.07	493.317	C24H48NO7P	[M+H]+	LysoPC 16:1(2n isomer)	Lipids	LPC	-	1	654310	577830	570920	341940	210050	465670	444090	410380	356690	415940	366930	337600	454860	288720	466350	360510	249690	402710	389850	340510	378250	320860	508780	218290	362480	313330	596150	395180	482100	410190	499950	391660	304000	174440	325530	375290	379500	269410	387390
pmp001270	494.32	184.07	493.317	C24H48NO7P	[M+H]+	LysoPC 16:1	Lipids	LPC	76790-27-7	1	4633200	4772200	3429400	1630500	1963800	2483500	2325600	1891700	2196500	2467200	2430500	2377300	2297800	2371300	3138700	1704400	1711400	1927200	1747000	1413600	1780600	2129500	2841600	1764100	629640	522970	1186500	802890	912090	760610	672660	558010	825250	635270	558830	759030	1437500	1801300	1833400
pmd0132	496.34	184.07	495.332	C24H50NO7P	[M+H]+	LysoPC 16:0(2n isomer)	Lipids	LPC	-	1	6206100	7876500	8357900	8174900	7926200	10427000	9341700	7432200	9352500	6574600	6738000	7762000	5229600	3749100	4953300	6270300	6709100	7714600	7089100	5428100	6329700	7094900	8920800	5471600	2308200	1571200	3350100	2783900	2620400	2820300	2178500	1986700	2916100	2034400	1709500	2067500	4963400	5257900	5152600
pmb0855	496.34	184.07	495.332	C24H50NO7P	[M+H]+	LysoPC 16:0	Lipids	LPC	17364-16-8	1	62472000	72812000	67580000	50440000	53477000	60378000	63904000	52310000	60814000	51160000	55994000	56899000	34056000	27434000	36524000	33265000	34599000	38629000	35612000	29912000	35743000	39815000	54493000	36362000	17213000	13911000	26553000	20073000	20216000	20488000	18951000	15272000	21238000	16583000	14904000	17919000	35145000	39844000	37518000
Lmhp008718	506.32	184.07	505.317	C25H48NO7P	[M+H]+	LysoPC 17:2	Lipids	LPC	-	2	97540	119600	102330	65028	60771	82853	86290	80291	78301	77751	76245	75431	21477	34718	36019	28026	37023	39471	41469	30961	35537	36551	45370	29352	23365	27749	47485	27121	44092	31095	43269	31586	44446	27308	12613	28580	45959	51692	50767
Lmhp009590	508.34	184.07	507.332	C25H50NO7P	[M+H]+	LysoPC 17:1	Lipids	LPC	-	1	323400	392500	385280	195240	216280	255490	264480	192660	242540	220730	221040	229810	242130	185900	251920	212070	170500	224740	192660	145050	185200	231010	327620	203780	62973	46421	112480	78467	78819	74227	67350	69137	83755	71087	62343	71257	147780	185370	170430
Lmhp010515	510.36	184.07	509.348	C25H52NO7P	[M+H]+	LysoPC 17:0(2n isomer)	Lipids	LPC	-	2	24719	38252	46045	40945	36590	40663	38964	31644	37517	35945	30087	40479	26269	16731	19474	30174	26799	34787	31511	23618	25630	33079	32078	28582	11370	10851	19566	15876	15881	14457	9432.5	14078	17142	14855	13938	11001	26116	26539	23922
pmb2406	510.36	184.07	509.348	C25H52NO7P	[M+H]+	LysoPC 17:0	Lipids	LPC	50930-23-9	2	11459	22676	14976	25670	16585	19876	24034	12901	23528	21001	25787	22484	14018	12835	19206	23301	24384	30317	12587	14976	17440	20179	18039	20344	9505.5	2667.6	15595	7687.4	5425.5	12255	6215.8	8366.1	10055	7344.9	4886.9	7387.3	14121	16719	14255
pmb0854	518.32	184.07	517.317	C26H48NO7P	[M+H]+	LysoPC 18:3	Lipids	LPC	-	1	72310000	76410000	71622000	55487000	55389000	65321000	65158000	56500000	63495000	57040000	59415000	60915000	34365000	30400000	33497000	31183000	33618000	33655000	32015000	28198000	32278000	36922000	47117000	30980000	13770000	10807000	21085000	16746000	19384000	17330000	15215000	13657000	17185000	14039000	11685000	14050000	34408000	39775000	40292000
pmb0865	518.32	184.07	517.317	C26H48NO7P	[M+H]+	LysoPC 18:3(2n isomer)	Lipids	LPC	-	1	70826000	75244000	64636000	53674000	56884000	68055000	64990000	56603000	62786000	57115000	58104000	61127000	34161000	29784000	34919000	32285000	34766000	34012000	35279000	30370000	33126000	37221000	47709000	30624000	13133000	10546000	22848000	16743000	19613000	17582000	16495000	13378000	18719000	13397000	11859000	14701000	33478000	40262000	40810000
pmp001251	520.34	184.07	519.332	C26H50NO7P	[M+H]+	LysoPC 18:2(2n isomer)	Lipids	LPC	-	1	79182000	85226000	77909000	59936000	62651000	70134000	73454000	65211000	72670000	61639000	65048000	70020000	42830000	36863000	44735000	43671000	43612000	45707000	42645000	37134000	41005000	43148000	57904000	38083000	22422000	16337000	29409000	25116000	26979000	23480000	23892000	20709000	26391000	18798000	17680000	20710000	44267000	49793000	49527000
pmp001273	520.34	184.07	519.332	C26H50NO7P	[M+H]+	LysoPC 18:2	Lipids	LPC	-	1	81931000	84258000	78594000	62641000	62731000	75062000	76101000	64904000	73725000	62874000	64446000	70755000	43273000	36798000	45233000	45205000	42632000	46231000	42965000	37141000	42990000	43271000	57057000	36411000	20908000	16997000	29126000	24941000	28028000	24633000	24258000	21722000	26324000	19281000	16318000	21508000	41767000	48231000	50104000
Lmhp010190	522.36	184.07	521.348	C26H52NO7P	[M+H]+	LysoPC 18:1(2n isomer)	Lipids	LPC	-	1	7443900	5873200	6919300	4422900	5635400	5953900	6182100	5425300	5395600	4444400	4590100	4406400	6573400	5963100	7988900	6527400	5455700	6973300	5898700	5481000	5805100	7249700	10330000	6034600	9437600	9566600	13515000	8862400	10412000	9071900	10367000	9134500	10353000	7996200	8470200	9800700	6469800	7901700	7231600
pmp001281	522.36	184.07	521.348	C26H52NO7P	[M+H]+	LysoPC 18:1	Lipids	LPC	-	1	13747000	13931000	15194000	9173500	10467000	12117000	12497000	9672000	11462000	9285300	8713700	9059000	12461000	10035000	15066000	12166000	11070000	14288000	11293000	10438000	11916000	14503000	22269000	11411000	5473700	3715700	7998800	7445000	7513100	6846900	5349800	5390200	7069400	4296300	3812200	4382000	8225000	10033000	9103100
pmd0136	524.37	184.07	523.364	C26H54NO7P	[M+H]+	LysoPC 18:0(2n isomer)	Lipids	LPC	-	1	78195	101800	135800	130500	133100	142970	144990	111310	139310	105290	108270	128450	97681	67830	74238	125060	118400	151280	136120	106650	137380	132070	168830	118690	42616	21140	64900	60804	55126	62769	45226	48785	69695	39691	31920	49460	78068	85367	81771
mws0126	524.37	184.07	523.364	C26H54NO7P	[M+H]+	LysoPC 18:0	Lipids	LPC	19420-57-6	1	842020	944100	1174100	719780	760450	836680	852440	721970	834150	743000	859110	783810	559700	485850	557960	605020	533800	663620	583660	480580	584420	607350	1046900	700400	266610	238220	415410	344220	328330	307550	328890	279670	360110	291370	271620	370530	454840	621700	572090
Lmhp010908	536.37	184.07	535.364	C27H54NO7P	[M+H]+	LysoPC 19:1	Lipids	LPC	-	2	59460	58785	81121	40838	36884	45396	43805	34613	41277	34025	39850	38727	22318	13238	22310	20135	16846	17625	24787	10366	19439	12530	25226	15374	8401.2	6746.7	16139	11928	8421.8	6319.6	5736.9	8469.1	9654.9	7272.1	7576.3	7622.7	25641	24487	25202
pmb2228	538.39	184.07	537.379	C27H56NO7P	[M+H]+	LysoPC 19:0	Lipids	LPC	108273-88-7	3	24863	18951	23490	23219	20158	23650	26031	22524	35064	13069	13435	9793.7	19557	30082	18159	35538	27786	22883	18108	20046	19066	22303	32774	18231	18382	23936	27074	32936	37853	35893	35618	26400	35210	16049	14444	19042	23564	25709	20751
Lmhp009890	546.36	184.07	545.348	C28H52NO7P	[M+H]+	LysoPC 20:3	Lipids	LPC	1199257-41-4	1	383270	416570	490630	218170	217680	269200	295550	247460	269820	304080	321270	331660	140060	108670	150130	97885	95035	111510	101690	102710	127000	149470	184330	127170	55432	49970	79407	70658	69326	66111	57969	54683	59903	62021	60572	62764	137300	158110	159580
pmd0147	548.37	184.07	547.364	C28H54NO7P	[M+H]+	LysoPC 20:2	Lipids	LPC	-	3	407380	485710	569780	248500	250640	367310	414230	283000	321290	319970	251510	313100	117800	75593	128280	88502	110400	100700	103590	107440	99782	128430	183820	93995	58809	46244	97332	85216	68426	82111	57493	59657	82900	64386	57554	72581	136810	206630	163900
pmd0146	548.37	184.07	547.364	C28H54NO7P	[M+H]+	LysoPC 20:2(2n isomer)	Lipids	LPC	-	3	43459	41876	62885	43774	45830	53701	42350	41225	50166	41402	41897	50318	20970	16278	21556	18828	16735	18949	14756	15539	20910	21369	32578	18682	25791	22188	38138	16668	19331	18527	22154	14127	23238	19957	12563	23790	24174	29930	25335
Lmhp011549	550.39	184.07	549.379	C28H56NO7P	[M+H]+	LysoPC 20:1	Lipids	LPC	-	2	85305	86036	121910	101800	109250	120910	115240	89673	112450	85124	80470	98378	54204	34963	54392	64235	65814	84261	69159	61356	50449	74437	92046	53715	59280	36504	103710	64632	56299	67342	68323	54787	71187	52058	47865	61146	61593	63580	66504
pmp001264	274.27	256.27	273.267	C16H35NO2	[M+H]+	Hexadecylsphingosine	Lipids	Sphingolipids	-	2	3551900	3979700	4125000	4774200	4421500	3911900	4136300	3986500	4163800	4596000	4537300	4050900	3682200	4232000	4086600	3329300	3472300	3588800	3644200	4028500	3971700	3724900	4560700	4960200	4158600	3573700	3886100	3908500	3737600	3956900	3379300	4391300	3868100	3181200	3358800	4141500	2828900	3158100	3009100
pmb2221	318.3	60.1	317.293	C18H39NO3	[M+H]+	4-Hydroxysphinganine	Lipids	Sphingolipids	554-62-1	3	583950	504340	582010	315280	334650	429840	360310	266070	362280	531110	546090	469850	529080	434500	460890	268970	320930	304050	272010	354460	301700	328370	267650	327190	426590	407260	435170	311900	417890	271570	312200	247210	288130	385150	342010	351970	442850	519960	472340
pmp001033	423.09	405.08	422.085	C19H18O11	[M+H]+	Isomangiferin	Flavonoids	Other Flavonoids	24699-16-9	2	1413000	1427400	1129500	1769000	1950700	1985700	1906700	1819700	2088800	1246700	1049700	1022300	2091100	1988700	2117300	2271500	2136000	2464000	2068500	1983600	1726100	1881000	2337700	1690300	2203900	2489900	2367400	2650400	2320200	2440100	2812000	2268800	2363600	2027600	2251000	2008400	1453400	1785700	1693100
Lmbn002737	119.05	93.03	120.058	C8H8O	[M-H]-	3-Methylbenzaldehyde	Others	Others	620-23-5	2	18461	16074	36856	14446	12650	21161	24240	18900	30438	5306.8	3255.2	8919.4	18668	19093	27175	31213	30216	21692	26410	25509	18026	16002	20913	14029	34724	12721	13172	12595	14538	19330	11906	13664	13018	1711.5	10930	3596.8	23128	13231	17438
Lmbn002644	119.05	93.03	120.058	C8H8O	[M-H]-	4-Methylbenzaldehyde	Others	Others	104-87-0	2	25712	31714	55514	27713	32260	21484	35008	27979	24089	2659.2	2510.1	4774.2	29208	32468	26242	20317	26467	29984	17620	15448	23084	35243	17376	9949.4	43452	42124	21098	18035	16199	27787	20309	15986	19383	9	9	9	14536	21845	18268
Zmdp000376	130.09	84.08	129.09	C5H11N3O	[M+H]+	4-Guanidinobutanal	Others	Others	-	2	8145300	5502800	5916200	8762600	7956300	10560000	8321900	7805100	6519700	14851000	10087000	8279700	8015100	9213700	7956900	10582000	10681000	9973800	10461000	12063000	10350000	9084800	10610000	7888400	8834200	8732400	8691500	18133000	18199000	15015000	15904000	13129000	11348000	6957700	7806700	7253900	12751000	11316000	9951100
MWSmce581	137.03	91.02	138.032	C7H6O3	[M-H]-	2,4-Dihydroxybenzaldehyde	Others	Others	95-01-2	3	8197.2	8137.2	6730.5	12041	11433	9529	12789	7333	13419	3409.8	8799.5	4705.5	8839.5	7675.2	7162.2	8130.2	8184	21659	17752	15040	7759	11565	17832	6111	19689	6141	9569.2	15616	17627	11978	18328	6135	9550.5	6823.5	16432	5212.7	11369	8048.5	6732.8
pmb0764	144.05	113.2	143.04	C6H9NOS	[M+H]+	4-Methyl-5-thiazoleethanol	Others	Others	137-00-8	3	2825.2	5681.7	5488.2	25242	25655	15316	25687	25304	22463	18889	17998	16671	16732	13940	6519.8	5103	4528.5	5974.8	10739	3388	5366	12416	11159	2838.5	21584	10753	7079.5	5604.5	3407	3395.2	2197.8	2268.5	3359.5	5076.2	3951	2831	8392.8	14598	10418
MWSmce572	148.08	103.06	147.068	C9H9NO	[M+H]+	(E)-Cinnamamide	Others	Others	22031-64-7	3	29413	29130	33494	37564	39463	29760	40729	31742	27007	43354	40292	34908	39726	42198	50217	52306	37016	51438	59791	67978	74712	59363	48949	60766	20223	36398	47278	36892	33234	45048	28203	37054	31206	87327	95321	82852	41138	51180	35009
MWSHY0141	163.04	107.05	162.032	C9H6O3	[M+H]+	7-Hydroxy-4H-chromen-4-one	Others	Others	59887-89-7	3	28992	72213	133280	52980	50943	48428	49130	48052	52921	4158.8	2993.9	8314	52624	68289	110130	43093	15403	41840	46686	36260	21514	33324	42502	25654	164840	69982	56336	50804	40562	25844	37261	50846	37250	12002	11185	31896	46826	58771	49964
MWSCX017	165.05	119.05	164.047	C9H8O3	[M+H]+	4-hydroxyphenyl acrylaldehyde	Others	Others	-	3	165840	216970	399000	230770	186980	268160	270750	321150	247140	14816	14782	13144	188400	176720	229410	172710	218000	201550	249220	145740	178130	144730	171600	64169	339200	273920	155200	129050	191990	110390	95498	59226	107780	21130	5232	18839	158820	150000	147420
Zmpp000906	170.08	134	169.074	C8H11NO3	[M+H]+	Norepinephrine	Others	Others	51-41-2	3	176040	310750	434290	15333	18449	18656	19771	13419	14101	58487	48945	72027	928930	917710	616760	378390	355130	439270	480750	430880	387190	392200	341180	193670	804340	671520	840760	91867	109560	76017	43502	94716	93681	152460	134270	98999	164620	212280	191450
MWSmce250	189.09	128.06	188.084	C12H12O2	[M+H]+	3-Butylidenephthalide	Others	Others	551-08-6	3	92447	131040	143910	107180	110790	130450	146360	100920	108960	136420	118280	173760	202920	170180	158640	152790	128010	153290	144270	153660	205910	188870	179150	179610	126200	163690	161050	154690	144550	163200	173160	130800	132680	164350	132900	163640	148230	138830	130950
pmn001380	187.1	169.09	188.105	C9H16O4	[M-H]-	Eucommiol	Others	Others	55930-44-4	1	96748	70821	94146	87166	84668	89905	88319	82285	86603	95873	106780	101350	79111	101540	131550	74006	94863	86352	88430	76798	86814	88149	98621	73678	85818	96803	80756	71308	59751	85144	75405	62711	64693	69051	68246	63191	92818	92768	87497
MWSmce041	191.1	145.1	190.099	C12H14O2	[M+H]+	Butylphthalide	Others	Others	6066-49-5	2	119920	191030	189850	145360	136230	194510	211290	137780	144070	192910	156460	229660	246980	235290	214390	249170	185920	202840	226650	209630	288870	270220	237100	244750	174510	222580	235000	194000	178620	223040	240260	178150	177940	212490	173500	222290	200220	180970	173960
mws1611	191.11	117.07	190.099	C12H14O2	[M+H]+	Z-Ligustilide	Others	Others	4431-01-0	2	2746900	3502000	3768200	2830000	2613400	4094300	4319500	2478400	2812000	3590800	2917000	4727300	5713400	5092800	5039300	5251300	4110100	4367000	5250500	4914600	6579200	6016400	5141200	5916500	4555500	5444800	6341600	4801200	3982000	5689200	6458700	4650800	4788700	5756900	4486600	6833600	4022900	4060000	4205800
pmp001235	195.14	79.1	194.131	C12H18O2	[M+H]+	Cinidilide	Others	Others	-	2	6675100	8382500	9039100	6157000	6182900	10410000	10571000	5790800	6612600	9001100	7185200	11648000	12760000	11075000	11333000	11660000	8984500	9745500	12102000	10749000	16677000	14629000	12409000	13536000	10419000	13524000	15290000	11000000	10089000	13699000	14877000	10309000	10868000	13668000	10034000	16482000	9240700	10373000	9495400
Lmxn008846	197.12	153.13	198.126	C11H18O3	[M-H]-	Hydroxydihydrobovolide	Others	Others	6067-11-4	2	101350	86577	75930	62264	67441	58027	67514	79133	67636	69077	72122	59841	50788	53344	48209	43720	45034	45021	37125	41861	44261	37841	51070	46308	83547	95602	78032	75681	79636	75967	87702	94830	81705	77593	70447	65566	66812	66082	67732
MWS1844	203.14	129.07	202.136	C14H18O	[M+H]+	2-Pentyl-3-phenyl-2-propenal	Others	Others	122-40-7	3	9561.2	11843	9541.8	8768.1	7648.8	8262.3	7950.8	10792	8458.4	7765.3	8332.9	8623.5	9419.1	10925	11348	6110.4	6522.7	9448	9392.2	8918.5	8349.3	9403.2	7849.4	7748.6	6611.9	8657.8	8519	8220.1	8551.4	9494.4	8836.1	8251.1	8010.3	8746.9	8646.4	6933.7	5063.9	3521.2	4166.8
Zmjp000966	268.11	136.06	267.097	C10H13N5O4	[M+H]+	Vidarabine	Others	Others	5536-17-4	1	11564000	14605000	7179600	8254300	8445700	9395900	9528000	8734000	9561700	12736000	11543000	12497000	10518000	6766100	7794400	5175300	5287600	6416600	9559600	9845600	9401000	12624000	13795000	8979900	9807200	4084500	11445000	11530000	10842000	13353000	11286000	10960000	13323000	15634000	13832000	16183000	7695400	9907100	9297700
MWS20159	271.12	91.05	270.11	C13H18O6	[M+H]+	Phenyl-β-D-glucopyranoside	Others	Others	-	2	178380	174030	198650	97995	68908	83821	101950	72862	92892	232630	206980	255850	219360	188830	171380	57946	82501	78412	56106	81863	78985	107300	87804	93320	232460	140450	155440	75320	92888	89592	94717	64935	70656	150860	150580	163010	117630	112660	142440
mws1038	277.12	146	278.13	C11H22N2O4S	[M-H]-	Pantetheine	Others	Others	496-65-1	1	129900	148960	208170	483380	182850	285450	327570	234010	319230	197250	304300	208230	194910	171020	174110	362000	358960	315270	292860	154170	269030	257640	333350	180760	125250	212870	191180	230120	115480	190840	255590	346350	317700	339660	144830	184100	232510	226100	182590
Lmbp010382	281.12	91.05	280.11	C18H16O3	[M+H]+	6-Methoxy-2-(2-phenylethyl)chromone	Others	Others	84294-89-3	3	33363	23705	23309	22387	13763	25907	24125	14158	27092	31284	26980	27638	27132	27273	26598	50900	30318	27104	33070	32026	26250	30454	27105	50990	38447	33010	37467	39935	27302	36513	22223	47515	33485	29096	26767	27903	8737.3	9798.6	17757
Hmyp002315	303.04	257.04	302.042	C15H10O7	[M+H]+	3,5,7,4'-Tetrahydroxy-Coumaronochromone	Others	Others	-	2	656880	703890	403530	863820	525530	1121200	732370	913000	1114800	418280	571540	1027400	467420	515370	365860	423310	466300	477230	486190	904890	530380	611920	703560	384070	977840	1857000	719510	598430	970610	804330	503170	1140900	913210	615070	542780	795920	177800	923260	834840
pmp001045	331.14	151.11	330.131	C15H22O8	[M+H]+	Bartsioside	Others	Others	62133-72-6	2	528910	219990	395000	589970	610770	563710	648320	566490	652280	258990	369780	325500	598680	487670	425690	504310	596670	592250	560150	215150	665580	372300	313720	255280	405510	293030	587160	709640	754510	494800	490090	507740	521820	403700	174860	269570	292250	253900	471350
Hmgn002833	371.11	297.11	372.12	C20H20O7	[M-H]-	4-Ketopinoresinol	Others	Others	-	3	6819.5	7025.8	7428.5	8844.8	9461.2	11670	9995.8	5775.9	6285.6	9090.8	12038	12019	10898	13595	9307.2	10418	11140	12996	12786	13840	11563	10750	12795	6173	14525	14519	15755	18456	20468	16279	23958	14885	14830	16075	14090	11747	11744	10880	14489
Smhn002274	373.22	211.17	372.214	C19H32O7	[M+H]+	Blumenol C glucoside	Others	Others	135820-80-3	3	28793	21955	17560	28991	7770.8	17094	31313	40259	20793	8541	23807	23567	17957	57882	12623	21964	30179	32755	26624	26568	33934	21235	28358	25628	18236	67320	26403	53616	85253	61397	63392	100920	76247	55486	41924	36548	46739	41335	39795
pmn001423	385.19	223.13	386.194	C19H30O8	[M-H]-	Roseoside	Others	Others	54835-70-0	3	11026	6082.5	6666.2	17607	15075	18864	13974	17083	22471	26212	24371	34595	18248	15207	16539	13377	13958	20673	17054	9088.8	7345.8	13439	17685	13317	20104	8806	18917	12830	6124.5	13472	16451	20870	20679	15256	20290	17078	15196	10290	9683
Hmmp003004	389.14	149.06	388.137	C17H24O10	[M+H]+	Vogeloside	Others	Others	60077-47-6	3	18414	72360	32113	36650	22472	37552	49993	37548	56795	5652	16798	18810	49828	35944	29882	63556	63060	74284	54296	54142	49396	65850	65752	35755	32482	32768	19201	17026	29955	23226	25597	27568	28432	7502.2	14967	10482	27353	41024	44724
Zmjp003597	389.21	191.15	388.21	C19H32O8	[M+H]+	Ampelopsisionoside	Others	Others	-	2	482660	554730	360830	389190	329910	358750	320880	255950	352900	587110	503280	954370	369800	412320	385230	336960	350560	379790	420480	388600	398630	416630	273920	401880	320710	341270	293160	220120	307820	296460	264550	347290	249360	458320	507160	472160	355690	388100	347810
pmp000604	435.13	273.07	434.121	C21H22O10	[M+H]+	Rubrofusarin-6-O-glucoside	Others	Others	132922-80-6	2	1213900	1535600	1102700	1004600	1265600	707390	1199000	1045200	785850	1358200	1227600	1223600	856680	950410	873110	906170	757130	879930	917920	888090	973110	765830	1117100	1037900	800750	868320	988230	1009100	928360	939190	1100600	850520	865000	957870	1280700	1131500	1139500	1147300	882520
pmp000307	439.16	259.1	438.153	C21H26O10	[M+H]+	Sec-O-glucosylhamaudol	Others	Others	80681-44-3	2	10234	5161.5	13581	71095	47387	61521	45569	34545	62311	18643	35800	23740	40357	38033	26425	88975	69229	92718	53041	16846	23021	29601	38263	16043	196730	181260	154990	321170	323010	223450	416080	360620	407000	212600	165460	167940	132850	130540	117880
Cmsp003083	521.2	131.05	520.194	C26H32O11	[M+H]+	Dehydrodiconiferyl alcohol-4-O-glucoside	Others	Others	107870-88-2	2	356110	536130	404440	407620	370010	360540	428190	369710	392530	582900	521290	550070	482870	371900	413200	276690	220110	267800	264470	358030	311050	286530	389170	343610	367010	300070	342920	295630	355690	326900	241280	213480	246300	499810	397580	459890	280110	335630	329730
Hmln003754	521.2	359.15	522.21	C26H34O11	[M-H]-	Icariside E5	Others	Others	126176-79-2	2	11978	13313	10672	17179	11052	13288	14097	9436	11690	6032.7	5015.2	6354.8	12674	15240	15936	9317	16244	15944	14640	22460	9986.8	13292	19927	4338.5	25196	13943	25620	21241	19942	14600	8675	19620	24632	13278	21283	16546	8049.2	13423	17987
pmp001282	544.34	485.27	543.333	C28H50NO7P	[M+H]+	Propyl 2-(trimethylammonio)ethyl phosphate	Others	Others	-	1	959950	1089000	1354000	709030	851390	1006700	964560	912800	928600	702740	673930	745160	656180	592350	850520	712070	663860	766310	645400	679600	761950	854000	1348900	730840	408360	402900	568980	557110	639830	531160	377350	385240	560090	423420	314900	315580	495550	671990	646750
pmb0782	86.1	69.2	85.089	C5H11N	[M+H]+	Piperidine	Alkaloids	Piperidine alkaloids	110-89-4	3	2390200	1744400	1818100	2697200	2034400	1963800	2218100	1698000	1770000	2448500	2071700	3493100	843240	825340	952490	1528900	1284200	1062800	1463700	1120400	916080	641430	1129600	503640	801340	803540	715540	1032600	1021000	739680	788640	847850	750880	698160	831810	770770	1155900	1117100	1020800
MWSmce460	100.08	56.05	99.068	C5H9NO	[M+H]+	2-Piperidone	Alkaloids	Piperidine alkaloids	675-20-7	3	10621	7656	13302	24854	19013	22661	18509	20021	26940	14814	12085	9269.4	19260	35332	30480	44607	21626	21697	29411	23651	12881	9934.2	21108	20156	22986	22495	14962	20496	18806	20915	17643	25505	10030	11718	23529	13940	25075	24140	19187
pmp001198	132.1	57.1	131.095	C6H13NO2	[M+H]+	6-Deoxyfagomine	Alkaloids	Piperidine alkaloids	197449-09-5	1	2430900	1684200	1747500	2444700	1956500	1858800	2230900	1612000	1588800	2427800	1942900	3508500	809160	836500	902000	1368700	1233500	1068800	1380100	1017300	967760	591440	1020200	519820	742800	977700	771710	1063300	1010700	775530	703440	821250	772020	760780	826770	736780	1187100	1121100	1000600
Hmqn002118	161.02	133.03	162.032	C9H6O3	[M-H]-	7-Hydroxycoumarin	Lignans and Coumarins	Lignans	93-35-6	2	50050	36190	32640	131270	135080	88102	205060	139180	141540	37772	60740	14085	149100	111910	124310	130570	120270	90460	81020	90127	148880	44779	107290	68347	39600	77626	72252	76192	127940	89738	102720	68597	125660	57660	62532	68707	100260	110390	106720
Jmzn006005	177.06	117.04	178.063	C10H10O3	[M-H]-	3,4-Methylenedioxy cinnamyl alcohol	Lignans and Coumarins	Lignans	58095-76-4	1	5371300	6477000	6459800	11208000	9315500	11573000	10673000	11402000	10347000	6351300	6260900	6778100	4292200	4933200	3616300	8078700	7467300	8664500	8300400	6950700	7232000	5346700	6530800	5409700	8087100	9810900	8896200	9850400	7904900	9693400	9842600	10846000	9577400	10077000	9119800	9142200	7416700	7577900	7176200
Hmlp003129	359.15	137.06	358.142	C20H22O6	[M+H]+	Matairesinol	Lignans and Coumarins	Lignans	580-72-3	2	59208	145800	89990	160300	114840	129000	128500	99825	132630	128940	137760	158420	36580	28455	21616	40064	42661	55958	44201	43213	46874	47893	43480	33033	83782	75729	60666	79995	61937	68709	86183	98116	108600	81853	86803	77525	67269	73995	62657
mws0097	357.13	151	358.142	C20H22O6	[M-H]-	Pinoresinol*	Lignans and Coumarins	Lignans	487-36-5	1	1371700	1305300	1379900	649360	531510	618330	622520	567830	562370	576880	582140	726720	1560000	1363500	1349600	567910	543230	679120	705940	727630	726190	982060	928560	755700	2381500	4612000	2705000	1171300	1320000	1232800	1430200	1341800	1238900	1295800	1250400	1037700	943170	950270	992050
Lmdn004267	357.13	151.04	358.142	C20H22O6	[M-H]-	Epipinoresinol*	Lignans and Coumarins	Lignans	24404-50-0	1	975080	1147900	1256900	556650	475680	549200	497650	528940	536500	528280	469030	525480	1290900	1191300	881000	450390	473030	521960	594260	703560	622480	725890	704600	603280	1944500	4118600	2262700	1021500	1025300	1084200	1339200	959820	1109100	897790	942830	879400	844580	867030	866540
Lmmn003748	359.15	180.08	360.157	C20H24O6	[M-H]-	Isolariciresinol	Lignans and Coumarins	Lignans	548-29-8	3	114550	161610	97217	84549	71329	74272	79924	79908	72167	90715	93299	88168	174470	201470	182910	141390	113760	154350	142850	207780	175170	146340	169160	155220	406640	456930	388170	244090	188900	182670	191530	222160	219420	491380	473070	488010	176610	188700	159600
Lmmn003875	387.14	289.07	388.152	C21H24O7	[M-H]-	Medioresinol	Lignans and Coumarins	Lignans	40957-99-1	3	9	4534.7	7282.1	6663.9	31158	19694	18619	10759	12493	5391.6	7097.8	9545.3	79466	50062	62482	83805	84498	86166	93056	89541	109990	80997	101920	66453	9	9	9	9	9	9	9	9	9	9	9	9	25189	39653	29743
Hmcn002743	417.15	181.04	418.162	C22H26O8	[M-H]-	Lirioresinol A	Lignans and Coumarins	Lignans	-	2	103280	119480	75529	113600	87833	121550	83650	69301	100340	65410	76239	94345	31753	39038	30626	24680	22707	26610	32662	30396	24002	24430	26564	23569	136140	148810	87213	83960	127570	100030	102460	86128	101940	216540	180110	157030	68380	70833	81041
MWS20152	417.16	402.1	418.163	C22H26O8	[M-H]-	Syringaresinol	Lignans and Coumarins	Lignans	21453-71-4	2	19920	20796	10908	18474	16384	20939	14956	12875	20725	12512	14189	17878	6894.1	7723.1	5644.7	3914.1	3912	5397.8	6417.4	5966.2	5118.7	6232.4	5564.6	5407	27359	27189	13933	14478	26730	20690	15164	19396	20067	32395	32237	33380	12963	11260	14952
pmp000682	538.22	359.14	520.168	C26H32O11	[M+NH4]+	Matairesinol-4'-O-glucoside (Matairesinoside)	Lignans and Coumarins	Lignans	23202-85-9	3	78977	108070	58962	261430	217220	231940	183450	166550	190280	175350	211780	372780	59295	75826	55800	86488	110620	105890	103050	109180	91212	102060	89560	76978	70260	65953	74800	97115	84764	114000	106710	130760	133930	124160	99382	97240	94379	83454	112480
pmn001378	519.19	357.14	520.194	C26H32O11	[M-H]-	Pinoresinol-4-O-glucoside	Lignans and Coumarins	Lignans	41607-20-9	1	1121100	1101100	1230600	999900	862410	844000	1226100	908250	1063600	541560	577070	645450	1978300	1933600	2210100	1095700	1036800	1333900	1188600	1606000	1562700	1221500	1697500	1597600	1715800	1217600	1200300	818470	766220	1004900	648130	601550	700900	1025300	784400	957870	1105600	1012000	972220
Lmmn002274	521.2	359.15	522.21	C26H34O11	[M-H]-	Isolariciresinol-9'-O-glucoside	Lignans and Coumarins	Lignans	63358-12-3	3	46664	32349	27410	42074	43200	34977	37867	43313	26207	37556	41004	65439	40216	41862	23256	19766	23533	27576	33391	47821	37980	23005	36757	29126	55186	51185	50450	53084	54529	53051	53298	89982	52426	83491	82825	53036	46756	33638	36545
Lmtn002596	521.2	359.14	522.21	C26H34O11	[M-H]-	Dihydrodehydrodiconiferyl alcohol-4-O-glucoside	Lignans and Coumarins	Lignans	-	3	27118	38432	33490	30517	53271	33799	38434	45610	33933	42067	51254	63920	41172	62771	31696	25742	33529	32155	28504	49591	28534	26723	37603	38517	33520	61555	54640	65955	60434	57606	72469	92759	74894	76724	84248	85322	67392	31051	48599
Cmsp005051	523.23	137.06	522.21	C26H34O11	[M+H]+	Isolariciresinol-9-O-glucoside	Lignans and Coumarins	Lignans	-	3	39036	28783	30604	41682	36604	43485	31024	25788	38298	54705	62049	52268	53646	119450	75641	55159	52596	58273	53511	64318	52511	68351	51403	83280	71788	81661	104780	73362	108720	75490	61828	75855	83825	145110	91922	126310	62218	51307	50839
HJN083	521.2	359.15	522.211	C26H34O11	[M-H]-	Lariciresinol-4'-O-glucoside	Lignans and Coumarins	Lignans	143663-00-7	1	31655	55345	56633	39295	14676	28436	35707	28838	45369	16102	22768	22433	79930	96760	64524	52588	56566	68813	74019	67926	58743	48233	77402	55519	60595	44624	47238	39681	38732	41194	25264	41468	27426	52265	43676	23258	45136	57291	40329
Cmsn002480	523.22	475.2	524.226	C26H36O11	[M-H]-	Secoisolariciresinol-9'-O-glucoside	Lignans and Coumarins	Lignans	63320-67-2	3	26585	19708	23862	7065.8	16254	8511	8405	13419	7966.8	47063	32729	39294	63736	100620	106400	19684	26767	25663	65316	51409	50493	77313	53336	88731	39120	48824	67964	28906	21258	26848	21226	27776	15676	143970	139540	115680	48302	45752	37478
Lmtn003096	523.21	361.14	524.226	C26H36O11	[M-H]-	Secoisolariciresinol 4-O-glucoside	Lignans and Coumarins	Lignans	-	2	183360	246650	151220	341700	351880	372600	302720	249690	232450	171150	217300	308660	434300	404260	294360	329560	360730	383720	376330	276890	357180	284040	325370	277660	336480	287540	317840	377730	299860	339680	305960	335920	341540	317490	235950	287860	286330	283460	313910
Lmdn001925	537.2	375.15	538.205	C26H34O12	[M-H]-	Olivil-4'-O-glucoside	Lignans and Coumarins	Lignans	76880-93-8	3	6605.2	4441	3484.9	12187	11276	10349	8979.8	4953.5	11106	6126.5	4404	4683.5	6103.8	19568	14896	10208	24841	17633	21519	17642	12148	11648	22900	15507	8864	9891.8	6905.4	9231.2	9893.2	11082	10682	8412.2	7417.2	9639.5	8237.5	10345	13417	13460	8176.9
Zmdn003480	537.2	375.15	538.205	C26H34O12	[M-H]-	Cycloolivil-6-O-glucoside	Lignans and Coumarins	Lignans	-	3	9	9	9	8980.2	8990.5	6412.1	10293	6286.4	16201	9	9	9	34306	36670	16806	56344	40342	55766	21079	44988	39048	37332	29220	8406.8	9048.2	20748	23798	25864	18381	17412	15266	9751	4572	14171	22258	21698	11079	14241	5429.2
Lmmn002260	551.21	389.17	552.221	C27H36O12	[M-H]-	5'-Methoxyisolariciresinol-9'-O-glucoside	Lignans and Coumarins	Lignans	-	2	20321	30718	44229	13578	18826	11097	20348	29436	22198	32939	33188	36268	54525	56721	41639	39218	16491	34058	33543	40802	39216	25045	23618	38282	41655	77278	47154	6799.2	17632	31383	10668	6920.8	39019	35049	49733	19893	38300	36480	43988
Zmhn001446	579.21	417.16	580.216	C28H36O13	[M-H]-	Syringaresinol-4'-O-glucopyranosid	Lignans and Coumarins	Lignans	-	3	92759	108640	98264	110400	90552	75419	98550	115110	92296	102120	166360	134080	145570	92670	118560	168690	151060	174020	141740	141750	140710	100840	138640	114890	129430	106330	111040	165340	152870	162470	125480	215130	164350	166070	176930	168840	134200	136160	137890
Zmxn003874	585.23	537.21	586.241	C31H38O11	[M-H]-	7,8-Dihydro-Buddlenol B(threo)	Lignans and Coumarins	Lignans	-	1	465490	571610	594060	651520	660260	728350	693790	709420	702570	386280	332550	391640	765630	713540	693640	1099700	991800	1162800	818680	1056700	896930	714030	1020600	744950	1076000	1184600	1112400	1551100	1283000	1308200	1389600	1551500	1455800	1138500	1031500	1038400	789710	819210	822640
mws0120	258.11	104.11	257.103	C8H20NO6P	[M+H]+	Choline Alfoscerate	Lipids	PC	28319-77-9	1	623560	652040	643260	2198200	1423800	1658000	2135600	1930600	1768200	550640	1255300	2165200	128150	130130	129870	187440	321370	249960	362100	154580	223830	156610	200060	163480	158670	114930	179700	407620	430640	404800	445250	407180	456880	124650	127370	81769	254390	472540	423790
pmp001194	176.09	158.1	175.084	C7H13NO4	[M+H]+	Calystegine B2	Alkaloids	Tropan alkaloids	127414-85-1	2	3145200	4765700	4787300	5658700	5518300	4738500	5026800	4656700	4682200	4902000	4741000	4713900	3479200	3807800	3789200	3522900	3559900	3685900	4032300	4053700	3925600	4041700	4335700	4088500	3230100	3717100	3180400	3506200	3899200	4188400	3589200	3538300	3764500	3733600	3946100	3705800	4498900	4428200	4332100
mws1496	290.18	124	289.168	C17H23NO3	[M+H]+	Hyoscyamine	Alkaloids	Tropan alkaloids	101-31-5	3	68139	62334	44075	76202	61134	88888	80461	77352	65472	80072	101450	49329	93154	64720	61939	36508	67246	67386	58003	81546	90116	69279	68060	72664	40437	63460	52273	44460	78201	63661	71619	64580	34659	47771	55339	54302	89710	69806	101900
NK10246260	162.06	116.05	161.048	C9H7NO2	[M+H]+	2,4-Dihydroxyquinoline	Alkaloids	Quinoline alkaloids	86-95-3	3	11818	13053	7222.5	10384	17964	12818	20703	11949	4590.5	10637	11920	11535	6839	13580	11562	11446	10756	12782	13704	9338.2	24126	6201.5	11476	6746.2	17164	21725	12868	22166	19891	10743	30390	15825	30012	16390	16341	17216	9874.8	13636	12283
mws1422	275.09	107	274.084	C15H14O5	[M+H]+	Epiafzelechin	Flavonoids	Flavanols	24808-04-6	2	4549100	6718300	8599700	15228000	14448000	12282000	14340000	12713000	13354000	17278000	15246000	13153000	2908600	2879000	2271300	3190300	2613200	3237600	3850500	3846100	3535000	3296500	3202900	3537600	4312300	3041300	4295600	4767500	5220700	4560500	5186000	4554200	4792600	7621100	7731400	7184700	6133200	6074000	6289400
pme3285	275.09	139	274.084	C15H14O5	[M+H]+	Afzelechin (3,5,7,4'-Tetrahydroxyflavan)	Flavonoids	Flavanols	2545-00-8	2	119860	169020	224100	225610	207260	206850	199110	144150	152940	556110	476100	372810	60409	59571	42623	58630	56240	56005	72293	79904	63838	63637	63302	81462	65665	81058	111930	112300	119000	88942	133840	130880	137960	244890	237600	239220	163450	146760	147350
mws0054	289.07	245	290.079	C15H14O6	[M-H]-	Catechin	Flavonoids	Flavanols	154-23-4	1	32079000	31780000	31237000	34015000	31652000	29404000	32958000	32219000	32920000	35559000	38703000	36947000	28848000	27385000	25392000	26819000	31258000	29189000	35268000	32537000	31351000	29487000	34602000	30620000	22788000	20865000	22892000	27998000	29719000	29453000	29537000	31368000	28394000	31339000	28301000	26651000	29325000	30842000	30534000
pme0460	291.09	139.04	290.079	C15H14O6	[M+H]+	Epicatechin	Flavonoids	Flavanols	490-46-0	1	8942700	6103000	6290000	8169500	8531900	9688600	8816400	9531600	8271200	7334800	7873900	8281300	5984400	7096000	6374700	6829100	6471300	6885100	7836600	8230600	7701000	6311100	8019900	7143700	6955800	7958600	6583500	7988000	9028100	9796400	9759400	9826500	9256800	8010300	8576800	8932700	5439800	7567500	7737100
MWSHY0098	307.08	139.04	306.074	C15H14O7	[M+H]+	Epigallocatechin	Flavonoids	Flavanols	970-74-1	1	29955000	20395000	21619000	20886000	22198000	23208000	21947000	22464000	23098000	21926000	19376000	18560000	21354000	21653000	21378000	23675000	21615000	22873000	21549000	23904000	26904000	22751000	23465000	24843000	25927000	28148000	27295000	24379000	25180000	25648000	27831000	25716000	28137000	27123000	28730000	29624000	23029000	23301000	24415000
mws0049	307.08	139	306.074	C15H14O7	[M+H]+	Gallocatechin	Flavonoids	Flavanols	970-73-0	1	2826900	2052700	1787100	1363200	1365400	1327500	1289600	1369100	1311400	2200300	2090200	1833500	2860200	2841400	2184400	1985700	2018400	2227000	2557100	2991200	3036700	2698700	2367200	3071500	1910200	2114300	1719500	2477000	2544400	2322100	2310800	2801900	2449600	3577300	3227800	3417600	1789100	2154300	2260900
MWSHY0020	443.1	123.04	442.09	C22H18O10	[M+H]+	Epicatechin gallate	Flavonoids	Flavanols	1257-08-5	1	10155000	6752300	7314400	5976400	5840400	6489400	6271300	5551900	6982600	7711000	8290200	7377100	7864100	8606500	7466200	6889500	6898600	7037500	7290700	7657600	7966300	8847300	7657700	8194400	7578700	8617200	9215200	6722000	7944600	7375700	7512400	7426800	7680200	8916600	9029100	9041000	4997000	7006400	7358600
MWSHY0177	443.1	139.04	442.09	C22H18O10	[M+H]+	Catechin gallate	Flavonoids	Flavanols	130405-40-2	1	3408300	2678200	2592900	2226000	2078400	3491300	2245900	2252900	2621000	2803500	3572600	3955400	3041800	3538000	3257200	3200400	3160200	2507200	2995900	3194900	2960200	4104500	3315100	3456400	2901100	3176300	3747100	2949600	2978900	3060300	2879900	2728000	3103000	3062200	3390400	3727800	2084100	3260800	3092100
pmn001416	451.1	341.06	452.111	C24H20O9	[M-H]-	Catechin-(7,8-bc)-4α-(3,4-dihydroxyphenyl)-dihydro-2-(3H)-one	Flavonoids	Flavanols	-	3	43310	17458	25463	35320	42119	29429	49874	65913	27938	34421	31742	26174	39734	15245	25538	20411	26252	30726	41549	47462	34210	25056	27712	25044	35929	48620	39270	62117	75063	96873	78917	81594	47134	73526	60566	37671	72134	39746	37399
pmn001415	451.1	341.06	452.111	C24H20O9	[M-H]-	Catechin-(7,8-bc)-4β-(3,4-dihydroxyphenyl)-dihydro-2-(3H)-one	Flavonoids	Flavanols	-	3	12051	3480	2802.5	19620	13438	12710	16939	16593	11163	13874	4155.8	4364.7	11166	8114.5	8368.3	10978	9962	13810	11061	11030	12646	6270.8	8956	7150.4	19256	21990	6191.8	21396	15464	24111	29978	39254	38836	8233	16541	6540	17998	16896	16030
HJN041	451.12	289.07	452.131	C21H24O11	[M-H]-	Epicatechin glucoside	Flavonoids	Flavanols	-	2	3239700	2542800	2705200	8801900	8102800	7053500	7302200	9362900	6901600	15139000	14666000	16256000	2138800	1438800	1486400	4006200	5748900	5003000	7407100	5725200	5891800	5766500	5366500	5842500	1021600	1553800	1779400	5873500	6253500	4922000	4152300	4186500	4799900	7792500	7278000	7595200	5497600	5748800	6237500
Zmdn002353	451.13	289.07	452.132	C21H24O11	[M-H]-	Epicatechin-6-C-β-D-glucopyranoside	Flavonoids	Flavanols	-	1	374570	383280	529800	520370	522440	426310	571350	547410	552360	802820	776360	685690	453730	489300	446300	487560	603070	488700	653800	587040	524970	497500	561270	483180	391980	380830	464230	585070	596000	468940	443140	610440	535560	652620	491110	468350	491090	502550	518700
Zmdn002400	451.13	289.07	452.132	C21H24O11	[M-H]-	Epicatechin-3'-O-β-D-glucopyranoside*	Flavonoids	Flavanols	-	1	418510	356780	500210	565140	601020	480840	634400	563500	522880	723470	737900	739150	520800	504550	434320	485720	686540	494410	601240	534780	430710	505820	605170	521250	412650	364530	556730	599020	576170	599100	461140	596030	550410	733050	659930	600100	483870	545910	592850
Zmdn002049	451.13	289.07	452.132	C21H24O11	[M-H]-	Epicatechin-4'-O-β-D-glucopyranoside*	Flavonoids	Flavanols	-	1	425660	380870	480880	632800	554040	468370	583770	547720	499880	717630	793460	716920	506140	465830	411240	506840	600480	506350	642690	579440	550650	511870	572330	515250	370740	374600	441760	589120	515190	553310	447490	595060	522020	623390	532430	496280	569910	522230	498330
Zmjn003358	455.1	289.07	455.098	C23H20O10	[M-H]-	Epicatechin-3-(3''-O-methyl)gallate	Flavonoids	Flavanols	-	2	17000000	10610000	4115700	33791000	31688000	34309000	30556000	35212000	32762000	109000	112090	178220	11592000	11393000	10032000	41778000	43856000	44434000	34660000	27901000	30269000	24024000	36533000	21706000	19243000	12821000	14591000	43931000	43893000	46023000	49981000	50081000	54319000	272520	313140	280010	23570000	26817000	25909000
MWSHY0060	459.09	139.04	458.085	C22H18O11	[M+H]+	Epigallocatechin-3-gallate	Flavonoids	Flavanols	989-51-5	1	11022000	6686800	6717200	4693500	4753100	5543200	4893300	5275000	5063700	6740400	6631000	7611300	7249400	8733900	8657300	6385600	7250300	6293100	7562700	7884400	7305100	8547900	8135800	8790200	9279800	9653800	9465100	8015000	7766700	7345600	7618600	7671300	8181100	8339700	8659100	10153000	5032200	7407600	7813100
mws2220	457.08	169.02	458.085	C22H18O11	[M-H]-	Gallocatechin 3-O-gallate	Flavonoids	Flavanols	5127-64-0	2	11026000	10651000	11841000	11172000	12120000	11282000	12374000	12502000	11199000	11672000	10742000	11789000	11210000	11111000	11403000	8909700	8680900	9077100	9643100	9780500	8499800	8987900	8519700	8843300	8554000	11595000	8561200	8681100	10748000	9107800	9576800	10855000	9692000	9947200	10144000	9164000	12013000	10090000	8935600
Hmjp004736	487.12	139.04	486.115	C24H22O11	[M+H]+	Epigallocatechin-3-O-(3,5-O-dimethyl)gallate	Flavonoids	Flavanols	-	2	38700	27108	13364	147000	150550	162960	150800	178710	150880	3810.8	3951	3965	66642	66737	55813	426550	328990	323620	187230	179710	257020	207490	301950	196360	118410	59204	58518	309110	206610	304700	262930	349270	328450	3178	3207.5	10276	131590	163620	177300
Lmcn005644	551.08	169.01	552.09	C27H20O13	[M-H]-	Epitheaflagallin-3-O-Gallate	Flavonoids	Flavanols	102067-92-5	2	484910	376700	275700	445330	423160	649950	487940	352740	495500	415120	387050	389430	452230	462890	422030	731840	791180	913810	852180	740960	646960	837490	519210	598140	437840	242820	380980	472020	378640	480500	372700	412100	524380	273630	227980	244020	338950	308100	365410
pmb3114	561.14	289.2	562.148	C30H26O11	[M-H]-	Epicatechin-epiafzelechin	Flavonoids	Flavanols	-	1	494550	458760	466250	1039900	951810	978170	1082600	931560	1043700	784220	702270	694060	341040	326490	333690	494560	531660	548960	514360	551200	521100	363490	478870	425470	327290	235210	331270	601490	574070	508470	466520	516420	521200	391640	367130	382050	521800	550090	487490
Lmcn003163	579.08	289.07	580.085	C28H20O14	[M-H]-	Epitheaflavic acid-3-O-Gallate	Flavonoids	Flavanols	34218-97-8	2	4001500	1854000	2131100	11267000	8707300	11166000	10615000	14069000	13366000	3552600	4019700	3021600	2394900	1979200	2045300	5920800	4059100	4792600	4551800	5656700	4879200	3295500	3204400	3002600	2814400	3105100	2666000	6900800	6988400	6900500	6624800	7344300	5503600	3462000	3382200	3295800	3434600	4403500	4434300
Lmmp003672	593.17	441.11	592.158	C31H28O12	[M+H]+	8,8'-Methylenebiscatechin	Flavonoids	Flavanols	81555-08-0	3	80929	33185	50885	121900	115500	129710	139520	119230	100250	44069	61233	77970	52857	53161	66324	73843	63022	83918	57850	69153	93828	98236	60491	67919	70103	57352	61282	117040	70428	80012	50564	62790	72920	61418	57137	56696	82670	51646	58021
pmb2947	865.2	407.1	866.206	C45H38O18	[M-H]-	Catechin-catechin-catechin	Flavonoids	Flavanols	-	1	3514200	4017700	3459500	4177100	3500900	3842800	3948100	4110900	4042600	3075300	3216600	2915200	2853400	2503100	2825200	2492700	2522500	2797200	2634100	3139200	2748700	2405400	2920700	2392100	2720600	2469900	2405300	2386900	3047400	2349300	2372700	1972100	2889900	2171200	1807800	2038300	2759500	2889600	3051600
pmb0681	403.1	367.08	402.095	C20H18O9	[M+H]+	Apigenin-8-C-Arabinoside	Flavonoids	Flavonoid carbonoside	-	2	155350	151990	229760	255070	229510	239330	233460	259890	260850	216270	151630	149210	526170	602500	320240	541020	459300	556530	534030	597300	586620	486150	520050	522600	317590	383280	400640	442150	383950	383730	322040	476670	416030	552860	479900	510480	353590	362590	308230
MWSHY0181	433.11	313.07	432.106	C21H20O10	[M+H]+	Apigenin-8-C-Glucoside (Vitexin)	Flavonoids	Flavonoid carbonoside	3681-93-4	1	2434300	2491400	3450600	5102500	5760500	6019800	4687100	5893600	5998900	1698600	1585800	2151400	6335000	6640600	4511600	8811700	8317200	11022000	7730800	7837100	8036100	6277000	8760100	6656100	5116800	8432400	8080200	9567600	6294600	7133000	7044500	9277800	8417900	4974600	6002900	5380600	5693700	6227800	5332400
MWSHY0008	433.11	283.06	432.106	C21H20O10	[M+H]+	Apigenin-6-C-glucoside (Isovitexin)	Flavonoids	Flavonoid carbonoside	38953-85-4	1	2142700	2273000	3416300	4198200	5884100	5360700	4619900	6062400	5620900	1831800	1618700	2027000	6872700	6622900	3729900	8596600	6515900	9830800	6267800	8213100	7730700	7328500	9394000	6003400	5024500	7792900	7713400	7872200	7378000	5988400	6605800	9605200	8244100	6346200	5249900	5940900	5499500	5996000	5644800
pme1611	433.11	313	434.121	C21H22O10	[M-H]-	Isohemiphloin	Flavonoids	Flavonoid carbonoside	3682-02-8	1	1249800	655570	669440	1269600	1141600	1235300	1101200	1419100	961000	925970	959970	842390	546090	451840	390830	830790	943560	1004500	890380	943970	1005000	500940	806160	554230	907040	983300	1003500	1595600	1544000	1414400	1314500	1318400	1303400	1427400	1293200	1640400	786310	875590	1037000
MWSHY0016	449.11	299.06	448.101	C21H20O11	[M+H]+	Luteolin-6-C-glucoside (Isoorientin)*	Flavonoids	Flavonoid carbonoside	4261-42-1	3	282770	413690	288900	505210	570040	486880	395130	577490	545310	350300	401790	458840	969350	1152900	655450	1290100	1207400	1690700	1010000	1545400	1207200	838120	1451400	965420	739390	1515700	1504400	1640000	1558300	965750	1068700	2561500	1781300	1882700	2102200	1877200	877470	853610	1093600
mws1299	449.11	299.2	448.101	C21H20O11	[M+H]+	Luteolin-8-C-glucoside (Orientin)*	Flavonoids	Flavonoid carbonoside	28608-75-5	3	293350	443830	448570	563920	588160	634040	531890	578120	520200	440430	482740	522130	902920	1000000	702150	1172700	1040000	1507800	840700	1664200	1291200	627820	1576100	866910	768430	1696400	1173400	1549300	1353300	1194900	1124700	1950300	1673200	1958100	1877000	1719200	761680	921200	1180900
pmp001110	535.14	517.13	534.137	C25H26O13	[M+H]+	Apigenin-6-C-xyloside-8-C-arabinoside	Flavonoids	Flavonoid carbonoside	-	3	339420	404660	674360	232570	339740	291290	287970	295340	232420	578540	705370	648770	1098600	1235300	629670	496150	383300	492110	492720	704260	418450	560420	474550	872250	790670	1067100	902960	432660	507120	410240	397910	461430	409700	1290500	1236500	1181600	678280	611840	601040
Lmtp002942	535.14	499.12	534.137	C25H26O13	[M+H]+	Apigenin-6,8-di-C-arabinoside*	Flavonoids	Flavonoid carbonoside	-	2	301470	303690	390680	162200	223270	230370	222970	244510	185090	456770	374010	435490	798290	963810	850740	498580	354970	364120	552240	634130	513220	627660	499950	651010	843940	697370	758990	314740	307510	334560	237770	308890	324290	1048500	1080000	866690	348540	446740	393320
Lmtp002822	535.14	499.12	534.137	C25H26O13	[M+H]+	Apigenin-6-C-arabinoside-8-C-xyloside*	Flavonoids	Flavonoid carbonoside	-	2	227960	344910	389180	179250	244260	230470	220590	213510	195860	494610	364190	403840	897370	920950	925380	499260	397860	497160	463840	677420	497190	659040	593870	705940	763450	762870	700300	374250	264430	332210	187640	312400	377980	815660	1144500	1077800	491410	490580	588110
mws1660	565.16	529.13	564.123	C26H28O14	[M+H]+	Schaftoside	Flavonoids	Flavonoid carbonoside	51938-32-0	2	22793	30822	28548	36992	35625	29986	30750	32719	48673	34436	29224	33746	43467	47650	46568	54943	45566	53522	49056	80775	44069	46256	59003	38576	47542	66568	65646	37724	53373	31320	29514	58442	45659	75386	60384	56868	61221	54163	44399
mws1292	565.16	409.09	564.123	C26H28O14	[M+H]+	Isoschaftoside	Flavonoids	Flavonoid carbonoside	52012-29-0	2	4948500	2994400	6490700	4910700	6367300	6444300	5387800	6777100	6828000	5835900	4145100	6637600	9396300	8311200	8533600	8585600	8964000	9644600	8757900	11023000	9382300	9453300	8188900	9386600	8908800	10156000	11490000	8764100	7983800	8651000	5728400	8193800	7922400	12858000	10906000	13533000	6230300	8793900	7404000
Zmjp003463	565.16	433.11	564.147	C26H28O14	[M+H]+	"""Vitexin-2""""-O-xyloside"""	Flavonoids	Flavonoid carbonoside	-	2	910980	764510	1102500	983530	1078500	1220300	1334700	1149500	1290900	1150000	1138900	1504100	2136900	1408700	2024400	2041200	1571400	1844800	1721400	1606400	1806000	1947600	2066300	1412800	1780900	2085800	2817300	1744200	1581100	1171400	1459200	1688500	1613400	2773600	2943000	2146000	1674200	1521000	1688500
Lmnp202580	565.16	433.11	564.148	C26H28O14	[M+H]+	Apigenin-8-C-(2''-xylosyl)glucoside*	Flavonoids	Flavonoid carbonoside	-	3	392500	439110	816330	1152700	1295800	1251400	1275300	1474400	1388300	359540	229930	501220	1473300	1199000	1145100	3402300	2894000	3334100	2759600	2669900	2601600	2050000	3014900	1934500	875710	1198000	1048400	3613900	2939800	2873700	2750500	3876200	3116600	1390800	1461200	1445500	1490500	1928200	1660200
pmp000236	565.16	367.1	564.148	C26H28O14	[M+H]+	Isovitexin-8-O-xylcoside	Flavonoids	Flavonoid carbonoside	-	1	56430	41670	123400	176420	189730	188940	214640	271260	230900	52987	39219	68263	199840	141580	160700	544220	374900	575990	461310	317380	421640	345250	337540	347420	158370	270680	215180	594450	414670	460910	540600	665060	607940	315230	239060	169670	265430	307590	325530
Lmtp002642	565.16	457.11	564.148	C26H28O14	[M+H]+	Apigenin-8-C-(2''-glucosyl)arabinoside	Flavonoids	Flavonoid carbonoside	-	3	3201600	2926800	4080500	3506300	3171200	3379500	3030400	3284600	4024500	3904200	3423900	3740200	6324400	6688500	6479200	6389700	5341600	6297500	5181100	6410400	5872400	6105500	6547200	6139500	5091300	6222900	7582600	4762000	5330200	4883300	4291000	6592300	5738200	7791500	8518500	8110200	5114000	5215900	5036900
Smhp004476	565.15	433.11	564.148	C26H28O14	[M+H]+	Isovitexin-2''xyloside	Flavonoids	Flavonoid carbonoside	-	3	362880	477840	757860	997050	1276300	1059700	1318600	1568900	1299000	323800	354150	391900	1389900	1022000	1027800	3074300	2855500	3303700	2191000	2374800	2398700	2184800	2917000	1796300	928340	1186000	1123000	3092600	2498400	2435500	2841500	3563300	3306000	1492600	1240700	1226000	1588300	1494200	1564100
Lmtp002474	565.16	427.1	564.148	C26H28O14	[M+H]+	Apigenin-6-C-(2''-glucosyl)arabinoside	Flavonoids	Flavonoid carbonoside	-	2	7956000	7322600	8623100	8554300	8975100	8457300	8224600	10341000	9997600	12074000	9619000	11069000	16330000	13699000	14175000	16228000	13968000	12706000	13339000	16597000	14204000	15789000	13274000	13763000	14397000	16227000	16514000	14406000	11481000	13141000	11542000	12606000	12130000	20186000	18693000	15387000	12512000	13905000	13928000
Lmnp102580	565.16	433.11	564.148	C26H28O14	[M+H]+	Apigenin-6-C-(2''-xylosyl)glucoside*	Flavonoids	Flavonoid carbonoside	-	3	390920	450040	739840	1113100	1203500	1047700	1229600	1218700	1247700	371050	290110	434190	1454300	864250	952420	3146600	2401300	3330600	2509700	1989500	2406400	2166000	2717100	1843000	784470	1044500	1346800	3058300	2215600	2651200	2426300	3395700	2993400	1067600	1301200	1158900	1586900	1539700	1386700
pmp000237	579.13	283.06	578.127	C26H26O15	[M+H]+	Apigenin-6-C-(2''-glucuronyl)xyloside	Flavonoids	Flavonoid carbonoside	-	3	2060600	2091100	3168200	7309900	7654600	6783100	7093600	7890800	6561100	2033400	1466400	2489500	7071700	5035600	5290700	16234000	14777000	16775000	11737000	11467000	13616000	11176000	15137000	10037000	4670900	6440300	6319200	15936000	16127000	16373000	15606000	19074000	17412000	7814800	7731900	8760800	7877800	9281300	9022200
pme3227	579.17	433	578.164	C27H30O14	[M+H]+	Vitexin-2''-O-rhamnoside	Flavonoids	Flavonoid carbonoside	64820-99-1	1	4124800	5787400	9521400	17518000	16947000	16529000	15984000	20364000	15344000	4494900	4273300	4942400	17332000	12125000	13567000	34781000	33488000	37534000	30031000	26704000	29177000	24429000	30442000	21072000	10551000	13671000	15099000	33628000	31296000	24968000	28412000	34682000	34771000	16658000	11215000	13399000	18880000	21549000	19983000
Lmyp004081	579.17	313.07	578.164	C27H30O14	[M+H]+	Isovitexin-2''-O-rhamnoside	Flavonoids	Flavonoid carbonoside	-	3	1783100	1381000	2904300	4199600	6075700	4815100	6454900	6140200	4893500	1041300	1229800	1534000	5316500	3424500	3738800	12937000	10436000	12424000	9534900	9542700	10459000	9178300	12183000	6678200	3757600	5275200	4706400	13661000	11673000	10351000	13298000	14236000	14166000	5958700	5796100	6027500	6260900	5312000	6895200
pmb0631	581.15	515.4	580.143	C26H28O15	[M+H]+	Orientin-6-C-arabinoside	Flavonoids	Flavonoid carbonoside	-	3	15024	6393	9852.8	5886.8	1980.8	12166	13047	6551	2515.2	21714	19391	31938	27751	35411	21796	5105	13653	20320	20491	23442	18520	13342	14686	40427	26572	29839	50636	11270	19380	16758	9892.5	19569	12550	82206	97174	77661	8975.5	17259	18580
mws1073	595.17	457.2	594.158	C27H30O15	[M+H]+	Apigenin-6,8-di-C-glucoside (Vicenin-2)	Flavonoids	Flavonoid carbonoside	23666-13-9	3	3552100	2400200	2807100	3818900	3639900	4085400	4088600	3840200	4809900	3004200	2651100	3281900	5667100	5890100	5823300	6091500	5954500	7289800	5707700	6796700	6388600	5814900	6492100	6141500	5151900	6232000	8313000	6362300	5978000	4343300	4959100	5683700	5849600	4749900	6715500	7223800	4134600	4934900	5035600
Hmmp003156	595.16	313.07	594.158	C27H30O15	[M+H]+	Saponarin(Isovitexin-7-O-glucoside)	Flavonoids	Flavonoid carbonoside	20310-89-8	1	7659300	6311600	8931900	15374000	11835000	16696000	15933000	16054000	16011000	6695200	4699700	5444300	14997000	13704000	12991000	28885000	24919000	28561000	23295000	22279000	27477000	24897000	25309000	18934000	12588000	14548000	13777000	25429000	24095000	27103000	22933000	27891000	25454000	16506000	18765000	19102000	15311000	18106000	16099000
Lmnp002413	595.17	449.11	594.158	C27H30O15	[M+H]+	Luteolin-6-C-rhamnoside-7-O-glucoside	Flavonoids	Flavonoid carbonoside	-	3	88943	179200	254670	288690	307000	338500	255480	386490	291850	202220	169090	406570	495060	351470	500700	884830	838520	897340	701060	1201100	932990	666340	975580	777960	312930	527450	595320	1092900	793250	1125500	826950	1348400	1168600	1082000	1003800	1009200	517140	701090	632770
Zmjp003291	595.17	433.12	594.158	C27H30O15	[M+H]+	"""Vitexin-2""""-O-galactoside"""	Flavonoids	Flavonoid carbonoside	-	1	10047000	10297000	13445000	24212000	28172000	26212000	28150000	28159000	26230000	10969000	9006300	10133000	27786000	24692000	21563000	39406000	35782000	37253000	37709000	36109000	37618000	37424000	40471000	29870000	19120000	19604000	22685000	37854000	36778000	34300000	39917000	34639000	32606000	26768000	26344000	25733000	25637000	30891000	32592000
pmp001106	595.17	577.16	594.158	C27H30O15	[M+H]+	Vitexin-2''-O-glucoside	Flavonoids	Flavonoid carbonoside	61360-94-9	3	542840	505900	596610	728120	674790	647600	675810	707460	755840	413800	407150	416670	809780	957400	936180	1219300	856920	1215200	963650	1151300	1011500	1048000	1126400	873910	888990	1300200	1434000	979990	1085600	998020	827440	1199300	820550	1236800	1067200	969570	609720	918510	911500
MWSslk146	595.17	433.12	594.158	C27H30O15	[M+H]+	4'-O-Glucosylvitexin	Flavonoids	Flavonoid carbonoside	38950-94-6	2	4724600	3907800	10760000	14450000	16064000	16252000	15306000	17144000	15336000	4219200	4071700	5793000	17919000	11652000	13388000	32273000	29296000	34416000	27608000	26437000	31298000	25180000	32228000	23433000	10536000	14469000	13753000	33200000	26946000	27913000	27579000	30161000	29991000	17443000	15653000	16421000	17877000	21410000	22571000
Lmlp002990	595.17	313.07	594.158	C27H30O15	[M+H]+	Isosaponarin(Isovitexin-4'-O-glucoside)	Flavonoids	Flavonoid carbonoside	19416-87-6	2	2161900	1615400	4928000	6497600	6728600	7698700	8684400	8751800	7867500	1777800	1864600	2308800	7987500	5737500	6672500	17916000	17773000	18735000	14948000	15993000	16538000	14038000	15775000	13369000	5505100	7485200	8606200	17585000	15511000	15700000	16400000	20473000	20336000	8392900	8596800	8776500	9641100	10468000	9531600
Lmgp004217	609.18	445.11	608.174	C28H32O15	[M+H]+	Diosmetin-8-C-(2''-O-rhamnosyl)glucoside	Flavonoids	Flavonoid carbonoside	98891-92-0	3	45493	22430	17516	128360	195740	159820	170430	193000	124840	14143	8278.8	39886	43845	89318	49596	531160	518910	662880	409930	391490	403520	317150	473640	271490	42248	46632	105100	747110	555050	506170	610730	909390	728020	75243	84466	53170	163580	210140	257720
pmb0665	611.16	465.1	610.153	C27H30O16	[M+H]+	Orientin-7-O-glucoside	Flavonoids	Flavonoid carbonoside	-	3	625240	755140	405310	2228900	1500400	1415400	1695300	1964500	1374500	783020	1303100	1646000	325340	494060	193550	772970	893240	1048900	1034900	673310	712660	436980	680960	426020	729140	803460	608030	1553000	1534500	1441600	1289800	1367100	1437300	763570	776120	817000	935430	1048300	1013900
pmb0624	611.16	431.3	610.153	C27H30O16	[M+H]+	Isoorientin-7-O-glucoside	Flavonoids	Flavonoid carbonoside	-	2	86795	77037	154310	117090	136200	183540	131380	159100	161240	91406	92863	98782	218970	125050	282650	490390	492740	536180	492920	510070	521570	304520	435350	362250	184350	347580	303650	635030	462610	530110	486090	731960	545590	654200	611000	692430	235360	252520	367780
Lmnp002584	625.18	463.13	624.169	C28H32O16	[M+H]+	Hispidulin-8-C-(2''-O-glucosyl)glucoside	Flavonoids	Flavonoid carbonoside	-	3	14917	5817.5	4157.5	41244	38330	40770	45866	25740	30841	9	9	1670	3304	33164	9938	139550	148460	148410	133570	77487	123340	85838	145150	52870	12110	7499.8	37335	206490	165730	175120	151570	208340	171540	3310.5	5806.5	1670	57674	78323	75512
pmb0618	627.19	465.1	626.185	C28H34O16	[M+H]+	Hesperetin-8-C-glucoside-3'-O-glucoside	Flavonoids	Flavonoid carbonoside	-	3	50984	33622	47156	112660	109050	55955	89792	79935	81438	77753	71149	65249	69258	65515	29987	55463	35130	39668	69165	53968	54056	41809	28906	32719	124340	81424	79028	85430	112110	90354	77884	92373	118110	53242	61168	112320	50584	81049	81264
pmb0613	757.22	577.2	756.211	C33H40O20	[M+H]+	Apigenin-6,8-di-C-glucoside-4'-O-glucoside	Flavonoids	Flavonoid carbonoside	-	3	5485.2	3071.1	5472.5	15722	17312	5503.8	19540	16306	16316	1079.5	2606.1	9	4345.5	6013.8	1625.2	54580	24078	37588	23502	14430	20238	12593	23566	19133	5194.8	7120	8271.2	32173	21816	27768	44110	43653	29980	9331.8	8153.8	16437	10101	19601	20522
pmb0639	757.22	595.2	756.211	C33H40O20	[M+H]+	Apigenin-8-C-glucoside-7-O-Sophoroside	Flavonoids	Flavonoid carbonoside	-	3	17345	16208	12216	64366	79936	68907	43911	95262	69323	22622	13606	13621	22840	10524	17984	101690	143030	94642	95277	72208	69050	63587	99688	46360	30958	27804	19826	82237	68504	52592	112770	153170	166280	25966	12948	13987	56938	38134	69556
Zmhn002173	755.2	455.1	756.211	C33H40O20	[M-H]-	Saponarin-4'-O-glucoside	Flavonoids	Flavonoid carbonoside	-	2	4225.2	4429.4	6366	22854	10396	19487	6186.8	11924	16946	6887	3720.2	5580.7	9460	11506	6866.2	34021	21388	11046	32443	27006	13654	23230	28100	29324	12610	10584	13496	48166	39985	42965	30436	35937	48874	23925	22573	14158	15753	14187	14582
pmb0626	757.22	433.4	756.211	C33H40O20	[M+H]+	Apigenin-6-C-glucoside-7-O-Sophoroside	Flavonoids	Flavonoid carbonoside	-	3	15222	1555.8	14810	23831	45898	34102	21666	36434	46190	4250	12385	4942.8	39722	17370	23547	73698	104060	70777	68720	63083	77582	46311	67449	41418	14196	35761	28539	58211	50157	59319	97629	88482	64306	24155	22874	9267.8	21704	42826	46486
MWSHY0051	287.06	153.02	286.048	C15H10O6	[M+H]+	Kaempferol (3,5,7,4'-Tetrahydroxyflavone)	Flavonoids	Flavonols	520-18-3	2	110780	106490	162200	181190	195690	148910	172420	129990	161790	187500	166570	180790	66200	65155	50004	53854	62004	80180	73447	59510	65979	75059	72420	52654	175250	264130	130900	142460	277020	128490	95285	127170	77212	110080	96050	104890	98771	113780	119060
Lmjp004941	301.07	286.05	300.063	C16H12O6	[M+H]+	Rhamnocitrin (7-Methylkaempferol)	Flavonoids	Flavonols	569-92-6	3	108290	92550	78864	183330	187910	239100	155080	143930	177020	165810	142080	172580	14196	11842	14010	13505	14227	8929.9	14328	9537.8	11287	10029	13950	18290	17175	15686	6686.1	8259.2	16068	21755	7878.8	4907.2	11303	28407	29955	32719	56616	59908	47616
MWSHY0029	303.05	229.05	302.043	C15H10O7	[M+H]+	Quercetin	Flavonoids	Flavonols	117-39-5	2	48004	52419	36483	75543	65052	56633	71398	65521	54865	30226	37141	54422	28799	18081	12316	8929.9	12150	28691	19639	24529	23635	14229	12033	15413	54716	89284	60105	74764	100000	61578	38661	66447	37657	43243	41670	49123	33911	30125	41092
pme3514	301.04	151	302.043	C15H10O7	[M-H]-	Morin	Flavonoids	Flavonols	480-16-0	1	1163300	1201200	1271000	2431000	1883100	1840500	1817100	1948900	1723000	1533100	1494100	1792000	727400	578390	431970	506320	632360	885080	782000	779910	745650	600490	798760	591900	1687800	2635800	1355200	2609500	3420000	2006300	1545000	2745600	1543300	1823400	1422900	1595700	1130400	1337700	1343300
Lmmn004912	315.05	271.02	316.058	C16H12O7	[M-H]-	3-O-Methylquercetin	Flavonoids	Flavonols	1486-70-0	1	29543	16827	27728	31700	30813	43460	34974	31069	34332	30199	27680	31363	16244	18526	14221	20883	25218	30083	19226	21853	18839	19277	33774	27432	13597	23880	16541	17601	17499	20171	34352	30173	25159	23149	28349	27714	18094	22317	25612
Lmdp003808	317.07	302.04	316.058	C16H12O7	[M+H]+	Azaleatin (5-O-Methylquercetin)	Flavonoids	Flavonols	529-51-1	3	62376	48468	72726	80868	94375	88827	61150	56799	69835	52578	56194	55398	49067	67166	49390	32426	60927	33768	50846	26696	38180	77292	50596	26778	79548	49878	82305	29364	36077	48080	38462	20351	38148	18328	29948	16315	44616	64870	47538
mws0988	315.05	165	316.058	C16H12O7	[M-H]-	Rhamnetin	Flavonoids	Flavonols	90-19-7	3	13875	9992.6	9605.4	19609	17733	21041	16708	20774	17199	13618	11096	19077	9	9	9	9	9	9	9	9	9	9	9	9	9	9	9	9	8118.4	5105.1	3357.8	7628.9	9	9	9	9	5964.1	4280.4	4755.8
mws0032	319.04	153	318.038	C15H10O8	[M+H]+	Myricetin	Flavonoids	Flavonols	529-44-2	1	369420	463930	331140	363610	317310	316440	335680	302110	224390	357420	356080	244220	224760	209430	228840	260240	351170	315660	450790	331920	411060	212800	314490	366940	284850	361510	360670	618350	598310	695520	519530	583660	538500	511160	519770	513990	469130	397970	251620
Lmcp004369	331.08	287.05	330.074	C17H14O7	[M+H]+	Quercetin-3',4'-dimethyl ether	Flavonoids	Flavonols	3306-29-4	3	108180	97407	110060	150480	128330	123690	142770	130260	158420	175020	101200	120030	196590	170220	179140	304150	234050	284780	286120	305340	217650	244630	220010	229200	200220	181760	237630	269570	277000	248300	278740	223000	267960	239100	268170	272430	134160	181070	168740
mws0917	329.07	314	330.074	C17H14O7	[M-H]-	3,7-Di-O-methylquercetin	Flavonoids	Flavonols	2068-02-2	3	121800	82572	70819	144880	143690	212780	135790	132810	159250	116840	111810	142730	9	9	9	9	9	9	9	9	9	9	9	9	9	9	9	9	9	9	9	9	9	9	9	9	42229	39869	46675
Lmfn005486	365	285.04	366.005	C15H10O9S	[M-H]-	Kaempferol-3-O-sulfonate	Flavonoids	Flavonols	-	3	391740	452680	556250	308780	368330	453730	274650	224870	251600	619780	512000	492660	1067000	882880	1091900	1327800	893520	1399100	1172200	1665400	1632400	1008700	1013800	1238000	794630	803060	1007500	848860	829020	852750	827580	871730	647850	1244000	1170400	1262800	654090	700950	721810
Lmfn005487	380.99	301.04	381.999	C15H10O9S	[M-H]-	Quercetin-3-O-Sulfonate	Flavonoids	Flavonols	60889-05-6	3	42711	24692	22625	17801	18161	24725	16414	13775	10764	32897	42614	37188	42482	60201	47633	30850	47656	39676	56688	85677	71288	55281	40322	84989	73101	52715	64654	29654	36321	30097	46157	28131	20911	134540	171480	189060	33291	33452	57937
Lmbp003668	419.1	287.05	418.09	C20H18O10	[M+H]+	Kaempferol-3-O-arabinoside	Flavonoids	Flavonols	-	1	47963000	52103000	49359000	27294000	28646000	25364000	26934000	27246000	25392000	45713000	43291000	44277000	59242000	37558000	43734000	16478000	17326000	15885000	20217000	26885000	21331000	32170000	23738000	25809000	41936000	63028000	49840000	15717000	19331000	19050000	19293000	17587000	17640000	43819000	44012000	38344000	31684000	33703000	33051000
pmn001637	417.08	285	418.09	C20H18O10	[M-H]-	Kaempferol-3-O-arabinoside (Juglanin)	Flavonoids	Flavonols	5041-67-8	1	1088900	964380	600350	381350	433460	400080	345020	417850	379150	425400	403890	432260	1926100	949220	1329100	493960	538190	512520	548250	684420	517680	719840	588070	518350	834780	2145000	973080	543180	563300	539790	461680	456070	461210	885470	842710	632690	582360	608560	669510
mws0919	431.1	285	432.106	C21H20O10	[M-H]-	Kaempferol-3-O-rhamnoside (Afzelin)(Kaempferin)	Flavonoids	Flavonols	482-39-3	2	9	243680	1149400	9	9	9	9	9	9	53022	125980	97132	2604300	554980	111390	9	9	9	9	245710	9	69289	9	9	675150	402710	332930	9	9	9	9	9	9	9	9	9	156050	148060	153540
pme0321	431.1	285	432.106	C21H20O10	[M-H]-	Kaempferol-7-O-rhamnoside	Flavonoids	Flavonols	20196-89-8	2	115180	131290	142160	40704	45070	32134	49494	58571	51454	62028	63749	66569	170880	78423	126630	42998	45664	37076	41723	92018	53748	73421	45199	85677	142880	295590	185580	57785	48758	52851	50937	59590	55982	177650	201000	143780	80618	85787	72379
Lmdp003509	435.09	303.06	434.085	C20H18O11	[M+H]+	Quercetin-3-O-xyloside (Reynoutrin)	Flavonoids	Flavonols	549-32-6	2	6373300	5996200	4569500	9596400	7892000	8215100	9106800	8978300	7612500	5670200	6963300	7314600	6653200	4183700	4968500	6410300	6265900	6322600	6412100	8039100	5532400	3614700	5896700	4110800	7856200	14710000	8135200	12917000	11743000	11924000	11409000	14375000	13062000	12442000	11026000	9894500	7465200	7006200	7660000
mws2186	435.09	303	434.085	C20H18O11	[M+H]+	Avicularin(Quercetin-3-O-α-L-arabinofuranoside)	Flavonoids	Flavonols	572-30-5	1	4513000	4405700	3323800	7524100	6711200	6768000	6676700	7642800	5905900	4280900	5101600	5220600	5365700	2973600	3278100	5243000	4364500	5583400	4821600	6351600	4299100	2842800	4272800	2996700	5441500	10827000	5480400	8871100	8659000	8976400	8094100	10617000	9695700	8970400	7887300	7304900	5485400	5937400	5578500
mws4183	433.08	300.03	434.085	C20H18O11	[M-H]-	Quercetin-3-O-arabinoside (Guaijaverin)	Flavonoids	Flavonols	22255-13-6	2	3204800	4451400	3360600	4366100	3351200	3466800	4499300	4203500	3104100	3108200	3866200	4291600	4175000	1784400	2762400	1580400	1953500	1623500	1564900	2165100	1769900	1121300	1552500	1220600	3598900	8705900	3375700	4827700	4785700	4930300	4026800	4907000	3793700	5303700	3945300	4712600	4031300	4076100	3553300
Lmfn004036	433.08	300.03	434.085	C20H18O11	[M-H]-	Morin-3-O-lyxoside*	Flavonoids	Flavonols	-	1	4371400	4090700	3257500	4333800	2991600	3606300	2958300	4721900	3366800	2793200	4336500	4068200	3715300	1990400	2428800	2308300	1983900	2389100	2594600	3685600	2457600	1241500	2138500	1269800	3586000	10704000	4713300	4911400	5251700	4141200	4348800	5884900	5418100	7039000	6653900	4622500	3879000	3413000	4001500
Lmfn004065	433.08	300.03	434.085	C20H18O11	[M-H]-	Morin-3-O-arabinoside*	Flavonoids	Flavonols	-	1	5403800	5722700	3803900	5090500	3735500	4363000	4498500	4725300	4068300	3672600	4360800	4342600	4815400	2298500	2525300	2600300	2464800	2672000	3041400	3751700	2680400	1514500	2237700	1774300	4597400	12271000	5748100	6274600	6026600	5375700	5228200	6358000	6006900	8820000	7962400	6076100	4808100	4524800	4676700
Lmfp004055	435.09	303.05	434.085	C20H18O11	[M+H]+	Morin-3-O-xyloside	Flavonoids	Flavonols	-	1	4750000	3167000	3221200	6546200	5974900	6477200	6451800	6826900	5361300	3936800	5305600	5099600	5939700	3082000	3440400	4832100	3839500	5328500	4663200	5823100	4617500	2515400	4187300	2701700	5762600	10279000	5778400	7853900	8551800	9220500	7948600	10220000	9942000	8935700	7687400	6756700	5465200	5486600	5906000
Hmcp002316	449.11	317.06	448.1	C21H20O11	[M+H]+	Isorhamnetin-3-O-arabinoside	Flavonoids	Flavonols	-	3	4989.5	14593	6770.2	8273.8	15081	11261	16834	11280	18979	15241	19045	9864.2	34398	14887	8604.7	5697.5	14212	14699	9325	14134	10708	7891.5	7940.2	11102	11784	25850	10393	22640	24052	18584	17287	30472	19043	19324	30242	27870	19123	18724	17274
mws0089	447.09	285.04	448.101	C21H20O11	[M-H]-	Kaempferol-7-O-glucoside*	Flavonoids	Flavonols	16290-07-6	1	37015000	41721000	40517000	40343000	41490000	37794000	38780000	38086000	36672000	26932000	25950000	29057000	33859000	25131000	26934000	18688000	22365000	21019000	23524000	20508000	21421000	19258000	17796000	16848000	37847000	44037000	39031000	23877000	26489000	28043000	22510000	23535000	22236000	27518000	29576000	27496000	29152000	30936000	31463000
Xmyp005654	449.11	287.06	448.101	C21H20O11	[M+H]+	Kaempferol-4'-O-glucoside*	Flavonoids	Flavonols	-	1	4402000	7001100	6349100	4701700	5067700	4273500	4306900	3906800	4841400	4375800	5145000	5062700	3827300	3819500	3106100	1827900	1588700	1863200	1813400	1590400	1982900	2208300	1606400	2244200	4520800	5371400	4872800	2103300	1944600	1931700	2159400	1709900	1938600	2289100	3046000	2572100	3492500	4011600	3228600
MWSHY0136	449.11	287.06	448.101	C21H20O11	[M+H]+	Kaempferol-3-O-glucoside (Astragalin)*	Flavonoids	Flavonols	480-10-4	1	9256100	3678500	4626300	12694000	15509000	14657000	13201000	14125000	14055000	1352300	2779300	3788400	7067200	7621500	8353800	8609000	9835300	8406200	7166800	6810400	8075500	7427100	7363100	5846700	13363000	12718000	8412000	10243000	11796000	11746000	8907600	8492500	9317200	3504900	3270700	5622300	3805400	6582200	8990300
mws0913	447.09	285	448.101	C21H20O11	[M-H]-	Kaempferol-3-O-galactoside (Trifolin)*	Flavonoids	Flavonols	23627-87-4	1	38235000	39918000	41598000	36077000	39589000	35089000	35343000	37203000	39303000	25819000	26937000	26672000	33050000	24630000	25361000	18000000	21167000	18482000	20406000	20238000	20273000	19249000	17576000	18144000	38739000	43208000	34853000	23167000	26688000	27431000	21868000	22110000	22383000	27612000	28458000	25827000	27157000	29290000	28394000
MWSHY0132	449.11	303.05	448.101	C21H20O11	[M+H]+	Quercetin-3-O-rhamnoside(Quercitrin)	Flavonoids	Flavonols	522-12-3	3	2004600	1575900	1322400	1797200	1503100	1558300	1577300	1659300	1274500	731510	1012400	1299400	1910400	944370	997100	1029200	989810	1261500	971910	1331700	851890	681610	888520	611790	3028500	7265600	2778900	2591900	2049700	2059500	2119100	3041900	2874600	3292500	2723400	1130500	1695500	1869100	1763900
Lmfn003630	449.07	316.02	450.08	C20H18O12	[M-H]-	Myricetin-3-O-xyloside*	Flavonoids	Flavonols	-	1	2817100	3001100	2583000	1681100	1853400	1423100	1733300	1625000	1398700	4981500	4650200	4347200	3827500	2488200	3775100	1502700	1737600	1851900	2241100	3794800	2906600	2430900	2861900	2979200	2398100	3386100	3240200	2250700	2385600	2032900	2111600	1504400	1829500	7070200	6254700	6549800	2745100	2736500	2217700
pmn001640	449.07	316	450.08	C20H18O12	[M-H]-	Myricetin-3-O-arabinoside*	Flavonoids	Flavonols	132679-85-7	1	2523100	2875500	2843800	1612700	1625300	1408100	1474800	2044900	1304600	4560500	4631900	4307600	3814600	2533500	3911200	1616600	1844100	1879900	1639200	3781700	3105300	2514800	3205100	3691100	2549100	3184400	3129500	2087200	2237800	2142200	2227400	1681200	1851600	7088900	7335700	6942900	2893700	3174700	2159400
mws0056	463.09	316.03	464.095	C21H20O12	[M-H]-	Myricetin-3-O-rhamnoside (Myricitrin)	Flavonoids	Flavonols	17912-87-7	3	6672	42921	143520	5402	8912.2	10729	5518.2	5435.8	5662.5	24297	38907	36188	661590	449640	71990	22660	19580	15528	26202	190960	24898	49888	25408	27966	161420	152240	72159	27721	13976	7352.8	6688.8	11312	15897	35592	44007	53786	44916	65629	82680
mws1329	463.09	300.7	464.095	C21H20O12	[M-H]-	Quercetin-7-O-glucoside*	Flavonoids	Flavonols	491-50-9	1	11324000	11611000	9303000	13479000	12483000	12498000	16006000	16215000	8597700	10941000	9900000	10371000	8882600	4505100	6588500	8335800	8069000	9336900	7452100	7018200	7742900	4087200	5888600	3933600	11647000	16785000	10017000	15105000	14641000	13757000	12414000	19253000	12907000	15911000	12907000	11762000	11027000	12897000	10164000
Lmdp003286	465.1	303.06	464.095	C21H20O12	[M+H]+	Isohyperoside	Flavonoids	Flavonols	35589-21-0	1	15973000	16622000	10684000	18068000	15153000	18380000	17316000	18283000	15943000	9413700	11333000	12919000	11852000	7539000	7842500	11104000	11369000	11214000	12062000	11602000	10294000	6783400	9828400	7585600	21407000	24518000	18763000	22656000	21897000	20931000	20933000	24435000	21953000	18989000	16501000	14935000	11283000	14266000	16024000
mws0856	463.09	301	464.095	C21H20O12	[M-H]-	Quercetin-4'-O-glucoside (Spiraeoside)*	Flavonoids	Flavonols	20229-56-5	1	13949000	10598000	7549700	18998000	18258000	18899000	15246000	17507000	13730000	10951000	11633000	11383000	9106300	5734300	7496400	11072000	11139000	8650400	10194000	9714900	8952800	5454100	9432300	5820300	13724000	18238000	9098500	20376000	15870000	16418000	12844000	17018000	16444000	14783000	17562000	13989000	14025000	14255000	12600000
mws0061	463.09	300	464.095	C21H20O12	[M-H]-	Quercetin-3-O-galactoside (Hyperin)	Flavonoids	Flavonols	482-36-0	1	1414900	1410200	1458500	1974800	1681800	2354000	1917200	2128400	1456100	1143600	1549300	1812500	1265500	684560	883870	741180	1058000	1503000	1176200	1226800	1060400	586000	913390	616910	1485900	2651300	1693400	2135400	1835500	2642600	1554000	2779300	2679000	1387900	2137200	1587300	1368800	1619000	1222400
mws0091	463.09	300.03	464.095	C21H20O12	[M-H]-	Quercetin-3-O-glucoside (Isoquercitrin)*	Flavonoids	Flavonols	482-35-9	1	16228000	23812000	14533000	24039000	22731000	23003000	20751000	27387000	22245000	15290000	20809000	18472000	15433000	10503000	10516000	13210000	14269000	14545000	13827000	16084000	16626000	7547400	11705000	6783100	21279000	20590000	18089000	27312000	24282000	22838000	20651000	26379000	25748000	16818000	20444000	21005000	15142000	19132000	20304000
pmp001309	465.1	303.1	464.095	C21H20O12	[M+H]+	6-Hydroxykaempferol-7-O-glucoside	Flavonoids	Flavonols	-	1	16388000	17529000	12010000	19740000	18707000	21358000	20163000	20279000	18673000	11435000	12087000	12784000	12895000	9257900	7929100	12348000	12054000	12270000	13396000	11652000	11725000	7600600	10597000	8192900	22494000	28041000	19029000	23921000	25715000	24689000	20990000	27190000	25796000	19433000	18373000	17872000	12073000	17687000	17930000
Smgp004575	465.1	303.05	464.095	C21H20O12	[M+H]+	Quercetin-5-O-β-D-glucoside	Flavonoids	Flavonols	-	1	14609000	15872000	10377000	18186000	16593000	18195000	17203000	17224000	15607000	9474100	10982000	12122000	10372000	7732400	6445600	9507400	10889000	10965000	10669000	10851000	11308000	6204400	9080100	6225400	19364000	24625000	15266000	21176000	20247000	19965000	20902000	22381000	17549000	16095000	16062000	14406000	10284000	12759000	15173000
Hmmp002121	469.12	317.08	468.113	C23H16O11	[M+H]+	Isorhamnetin-3-O-gallate	Flavonoids	Flavonols	-	2	1167900	1155600	990780	1283500	1416700	1463200	1455300	1441500	1192600	1652800	2090700	1618100	578070	511610	502250	668760	788200	664780	858000	651030	789790	594920	829900	836290	951370	942980	766840	1379100	1418500	1350100	1524600	1387700	1338100	1103200	1139200	912500	1023700	921540	911310
Hmcp002207	479.12	317.06	478.111	C22H22O12	[M+H]+	Isorhamnetin-7-O-glucoside (Brassicin)*	Flavonoids	Flavonols	6743-96-0	1	425410	742000	332740	544080	441040	476500	388680	500040	369380	633270	790160	1146100	855880	589020	422660	400710	480480	560520	540280	565210	549600	369740	451870	411330	644510	1283000	646500	791590	668510	737180	829640	835210	776880	1298800	1168200	1170800	594210	678850	587030
Lmjp003295	479.12	317.07	478.111	C22H22O12	[M+H]+	6-Methoxykaempferol-3-O-glucoside	Flavonoids	Flavonols	63422-27-5	1	878430	393640	440530	2305300	2549900	2602600	2467900	2447000	2708400	240120	181910	199810	1083100	1022800	906880	3266300	2983300	3516000	2057600	2284500	2983800	3431600	3443200	2433700	1226800	699670	804220	3650400	3660100	3684600	3377500	3270300	3306600	396160	625280	408610	1641500	1745400	1903300
Lmjp003044	479.12	317.06	478.111	C22H22O12	[M+H]+	Isorhamnetin-3-O-Glucoside*	Flavonoids	Flavonols	5041-82-7	1	162220	58221	58174	282340	464900	440040	482970	499790	454230	19821	29969	25994	166560	127810	89165	612300	535210	571380	448080	392960	520400	404310	496910	305180	283140	122530	192290	627240	634650	649580	389710	823890	659120	91455	95439	72816	311620	386890	350600
Lmjp002906	479.12	317.07	478.111	C22H22O12	[M+H]+	Rhamnetin-3-O-Glucoside*	Flavonoids	Flavonols	27875-34-9	1	328360	682000	355210	492680	397390	441450	422420	530410	396580	688020	818880	904720	960200	634690	373280	430930	425830	357160	486110	584690	543150	419220	402370	434700	675200	1166900	685360	638710	656100	719430	817840	824040	871510	1388500	1318500	1269500	537730	610980	645050
Lmdp002969	481.1	319.06	480.09	C21H20O13	[M+H]+	Myricetin-3-O-galactoside*	Flavonoids	Flavonols	15648-86-9	1	14308000	12217000	8249400	7495800	6987100	7515000	7535200	7663800	7064200	11069000	10796000	11324000	12471000	12849000	10637000	12066000	11252000	12416000	12985000	14773000	14455000	13414000	12303000	13679000	17805000	15513000	15503000	14254000	13678000	14614000	13105000	14250000	13329000	17885000	16707000	16928000	10020000	12652000	11964000
Lmpp003465	481.1	319.04	480.09	C21H20O13	[M+H]+	Myricetin-3-O-glucoside*	Flavonoids	Flavonols	19833-12-6	1	13247000	13058000	8903200	6757300	6600500	8834400	7731200	8591900	7184600	10737000	10144000	10703000	12404000	13186000	10575000	12488000	12549000	12517000	13754000	14642000	15526000	9934200	13126000	13435000	17964000	16089000	16342000	14133000	13908000	13843000	13594000	14014000	12662000	16898000	18101000	16586000	9111700	11657000	12741000
Lmmp001947	481.1	319.05	480.09	C21H20O13	[M+H]+	Gossypetin-3-O-glucoside	Flavonoids	Flavonols	-	2	13841000	14093000	9439900	7537200	7349200	7578900	7635200	7924100	7086800	12019000	10419000	10923000	13205000	14284000	12307000	13490000	13019000	13009000	15686000	15751000	14484000	12411000	12420000	14454000	18044000	16533000	16670000	14340000	14432000	14895000	14163000	14936000	15531000	17337000	18449000	18221000	10018000	11550000	12940000
Lmmn003398	489.11	285.04	490.111	C23H22O12	[M-H]-	Kaempferol-3-O-(6''-acetyl)glucoside	Flavonoids	Flavonols	-	1	1080200	3500900	1190200	1638100	2390400	1466700	1764200	1546000	2258700	466100	349490	422910	3596300	2930700	2544000	1502800	1557700	1503900	2102500	1612700	742110	1053300	1478000	759520	5727600	2258000	1543900	917920	914760	829390	920330	926160	1142900	513420	704450	1344200	1544500	1831300	1680700
Lmmp003903	491.12	287.05	490.111	C23H22O12	[M+H]+	Kaempferol-3-O-(2''-acetyl)glucoside	Flavonoids	Flavonols	-	1	5883300	6591000	4109900	2377600	2036900	2167900	1944200	1740900	1901000	2198000	2743700	2857000	2208000	1801100	2283000	766100	839130	723210	866030	1009200	839150	890960	951100	718910	2356300	4862600	3167600	1218400	1495900	1297800	1388800	1105900	1112800	1421900	1522800	1148900	1677800	1900400	1947300
HJAP005	495.11	333.07	494.105	C22H22O13	[M+H]+	Laricitrin-3-O-glucoside	Flavonoids	Flavonols	39986-90-8	2	2519900	2675200	1114600	4466900	4545900	4139200	4282700	4409300	4017700	1763500	1711400	1720700	3877300	3729500	3257800	11939000	9585400	12435000	9956100	8728700	10864000	7278700	10479000	5525800	8171400	4351800	5828200	12046000	11317000	12170000	11910000	13799000	13959000	3918700	3662200	3900500	4846000	6813600	6887000
Zmsp004363	507.12	303.05	506.106	C23H22O13	[M+H]+	Quercetin-3-O-(6''-acetyl)glucoside	Flavonoids	Flavonols	-	3	171000	199960	111350	142950	80500	89641	94144	118790	94861	94296	164520	132590	66393	56734	45423	21792	25936	26408	18292	51004	25933	24431	15511	22802	90762	197300	77385	53870	59539	46799	70792	57817	47481	97430	80017	66998	76407	79751	52452
Hmln002199	505.1	300.03	506.107	C23H22O13	[M-H]-	Quercetin-3-O-(6''-acetyl)galactoside	Flavonoids	Flavonols	-	3	69163	444500	218440	240600	193540	141370	244990	210850	170560	96958	87510	77918	218080	139200	89310	97810	157240	117940	78341	140920	115900	48728	40553	49233	288660	272330	229880	217900	103200	162170	102190	244990	146290	179700	122750	110190	115870	167390	97046
Hmcp002187	509.13	347.07	508.121	C23H24O13	[M+H]+	Limocitrin-3-O-galactoside	Flavonoids	Flavonols	-	3	36590	84275	26673	54987	61764	69457	52157	60410	42354	57832	62720	51716	339670	262280	230830	349670	294230	328020	265320	297130	342030	212340	272830	256780	224020	221530	186350	331840	276350	251290	294570	356140	318080	220040	279460	211720	182020	221640	191200
HJAP006	509.13	347.08	508.122	C23H24O13	[M+H]+	Syringetin-7-O-glucoside	Flavonoids	Flavonols	-	3	53140	78776	14817	50814	44948	54638	60414	49632	40544	56416	32460	40010	436860	304230	179190	322260	208830	302360	280050	261750	411570	205390	291700	212490	195260	226280	179180	306440	247090	229570	319350	309410	301170	233960	236730	193190	186420	202420	164760
HJAP018	523.1	319.05	522.1	C23H22O14	[M+H]+	Myricetin-3-O-(6''-acetyl)glucoside	Flavonoids	Flavonols	-	3	17345	18282	19670	5924	9122.2	4505	5705.2	9340.5	5269.2	15090	11918	14400	23916	15032	29306	6794.8	6111.5	5971.2	6105.5	23459	12821	19913	16716	21006	27518	9081	14224	3796.8	5246.5	6808	9032.5	4518	6625.5	21638	23887	21361	10443	11205	7672.5
Lmdp004892	535.11	287.05	534.101	C24H22O14	[M+H]+	Kaempferol-3-O-(6''-malonyl)galactoside*	Flavonoids	Flavonols	-	1	13545000	25111000	17788000	12308000	16027000	15040000	13444000	13405000	12707000	6085600	6929500	6870500	15405000	14240000	12013000	7500000	8154100	8432600	8729000	7938400	7610800	7648500	7017500	6510200	19121000	11796000	16693000	5867900	5891800	6441500	5869300	4417000	4580300	7602600	8042700	5781500	8038100	10067000	9164400
Lmmp003817	535.11	287.05	534.101	C24H22O14	[M+H]+	Kaempferol-3-O-(6''-malonyl)glucoside*	Flavonoids	Flavonols	-	1	11816000	24904000	19589000	13598000	17155000	13917000	13413000	13808000	12501000	5639000	6597800	7374600	15754000	13357000	11277000	7921300	9059500	8987300	9159900	7241800	7675400	8263200	5714600	6126300	18060000	11404000	17903000	5274500	5804400	6305300	6457100	4818600	5190600	8199200	7314700	5908900	8316400	10514000	9640800
pmp000589	551.1	303.05	550.096	C24H22O15	[M+H]+	Quercetin-7-O-(6''-malonyl)glucoside	Flavonoids	Flavonols	-	1	631890	983430	758930	445220	566310	599700	607330	739650	548580	458210	440210	636200	924780	921020	824900	675140	613050	777670	868180	775470	626240	427840	430670	490920	1268900	900230	1000200	547980	636170	592610	602570	651470	654330	599140	489980	629090	625200	601340	646040
Hmln002189	549.09	505.11	550.096	C24H22O15	[M-H]-	Quercetin-3-O-(6''-malonyl)galactoside	Flavonoids	Flavonols	-	3	395710	469340	364790	281720	314470	299230	310870	311140	246980	138790	263680	191380	340990	312400	309260	266970	316670	374340	360680	316740	304620	197200	231880	186580	622760	398270	528280	331050	275400	364750	315530	330050	334710	367570	322520	264500	312670	284370	290200
HJAP064	565.12	317.08	564.088	C25H24O15	[M+H]+	Isorhamnetin-3-O-(6''-malonylglucoside)	Flavonoids	Flavonols	-	3	7709.5	8590.2	8097	11175	19320	12512	15810	15552	14934	14656	16083	19666	70654	35092	30673	43128	54911	53584	57868	65451	64438	34916	42370	39322	32388	25476	38824	46472	41448	61508	47101	61120	50560	83912	91756	57968	38844	42604	44976
Hmcp001858	565.15	287.05	564.147	C26H28O14	[M+H]+	Kaempferol-3-O-arabinoside-7-O-rhamnoside	Flavonoids	Flavonols	-	3	58432	143460	59999	20516	18026	31068	34343	25364	11476	29341	45688	35717	106750	84696	69500	5757.2	13062	29382	18887	22350	16454	47555	37684	9679	68302	82858	123500	21336	29630	32734	67490	24574	78004	49541	32341	20524	35440	31570	22164
Lmtp004126	567.1	319.04	566.091	C24H22O16	[M+H]+	Myricetin-3-O-(6''-malony)glucoside	Flavonoids	Flavonols	-	3	217010	199920	118240	42412	79621	47062	63686	66968	41982	47920	67779	67005	233380	314270	214650	78941	84987	107810	108690	83210	92706	92703	84556	62270	289820	139630	185250	68662	43336	72764	62058	57359	70237	92441	94565	72820	96511	116810	108980
Lmmp006709	579.15	287.06	578.142	C30H26O12	[M+H]+	Kaempferol-3-O-(4''-p-coumaroyl)rhamnoside	Flavonoids	Flavonols	-	2	306280	419260	76605	55014	56286	72153	61856	38729	59914	147750	277390	211050	1461600	1062200	1330800	64969	62445	85717	61621	338870	57253	307120	165420	71994	1400800	1370800	407770	94444	91147	104870	101790	77879	85837	204850	275720	109900	275640	261180	238540
pme2493	579.17	287.1	578.164	C27H30O14	[M+H]+	Kaempferol-3,7-O-dirhamnoside (Kaempferitrin)	Flavonoids	Flavonols	482-38-2	3	614520	729750	682450	518250	545740	552350	546890	474200	459220	1429400	1318300	1120400	725460	584100	582230	403000	501100	458640	456860	643820	584620	552610	609740	686420	385060	415760	722710	325950	412290	354120	467000	415910	460800	707340	718700	667820	433830	441710	478730
HJAP148	581.15	287.06	580.142	C26H28O15	[M+H]+	Kaempferol-3-O-sambubioside	Flavonoids	Flavonols	27661-51-4	3	466810	572650	352570	1384300	1467100	1447400	1368200	1156100	1478200	85359	116790	128670	428500	687530	632630	1024300	1185200	1253100	877150	633660	696220	665230	647020	431290	849740	542980	383580	692550	870840	906920	688080	742650	745130	116220	115620	107940	650780	671420	617150
Hmcp001769	581.15	303.04	580.142	C26H28O15	[M+H]+	Quercetin-3-O-rhamnosyl(1→2)arabinoside	Flavonoids	Flavonols	-	3	34014	25770	27460	34894	17525	16249	21086	40067	25991	23073	17441	9588	25581	12103	31227	24962	22337	10932	19094	12862	14897	14655	19359	11557	38136	53948	39534	6761.2	31578	19730	22451	26143	23796	29006	24088	24251	9440	21330	32230
MWSHY0161	595.14	287.06	594.137	C30H26O13	[M+H]+	Kaempferol-3-O-(6''-p-Coumaroyl)glucoside (Tiliroside)*	Flavonoids	Flavonols	20316-62-5	1	3442100	6021500	2046600	3439700	3430400	3511200	3291300	2944600	3264400	8665600	10287000	8837200	19697000	11857000	15727000	3854900	4554700	4886900	5110300	12031000	5655600	8849500	5871100	4769700	20473000	20508000	10835000	5265400	7406200	6310200	5657600	4883400	4636400	12112000	12350000	9003100	7068400	7619600	7354800
Lmyp004407	595.14	287.05	594.137	C30H26O13	[M+H]+	Kaempferol-3-O-(2''-p-Coumaroyl)galactoside*	Flavonoids	Flavonols	-	1	3589100	5780800	1864200	3433900	3367600	3900300	3376100	2929200	3527100	7871500	9733300	8088100	18989000	11278000	16376000	3894700	4269500	4622800	4885700	10760000	5176300	9287000	5539700	5053600	20715000	18788000	10602000	5353300	7223600	5830800	6001800	5123500	5306100	11635000	13143000	8780000	7254600	6774000	7231900
Lmyp004318	595.14	287.06	594.137	C30H26O13	[M+H]+	Kaempferol-3-O-(6''-p-Coumaroyl)galactoside*	Flavonoids	Flavonols	-	1	3789300	5768800	2027000	3456000	3527500	3867700	3203000	2988000	3361600	8182100	9810600	8515100	19044000	11671000	16518000	3854700	4722700	4991700	5392100	10391000	5613100	9291600	5753400	5083800	21105000	19817000	10313000	5621000	6743800	6673300	5982800	5130400	5078900	12097000	11897000	8537600	6993100	7339600	7681100
Lmsp004670	595.17	287.06	594.158	C27H30O15	[M+H]+	Kaempferol-3-O-glucoside-7-O-rhamnoside*	Flavonoids	Flavonols	-	1	6636900	5232200	5885000	9077800	9219100	9678900	8517700	8699800	8653100	9997200	9581400	10253000	3544200	4218500	2894600	5872700	6704600	6113200	6319900	4963800	5910400	5730400	5450800	4851600	7090400	4713700	6702400	7093500	8043000	7779500	6727600	7004700	6600000	5240300	6243800	6729200	5481500	6076300	6598000
Lmsn002815	593.15	285.04	594.158	C27H30O15	[M-H]-	Kaempferol-3-O-rutinoside(Nicotiflorin)	Flavonoids	Flavonols	17650-84-9	1	3206200	3400500	4054000	10252000	9406400	8320900	8948000	10844000	9528900	3741700	4314100	4229500	2596100	2773400	1649300	4877800	5058700	4274100	4359900	4082500	3989700	2667200	3020700	2733200	6422300	2947700	3277100	5025500	6026900	5910600	4586000	4985900	5620900	2430300	3122900	3037400	5732100	6273000	4652500
Lmjp002867	595.17	287.05	594.158	C27H30O15	[M+H]+	Kaempferol-3-O-neohesperidoside*	Flavonoids	Flavonols	32602-81-6	1	4738500	3779200	4070900	5655700	6181900	6812000	5344300	5480300	5929600	4621100	6537900	6969000	2538900	3005600	1994800	3917200	4393200	4021200	4593900	3155400	3751000	3530000	3881000	3284600	4901200	3271600	4459900	4409000	5042400	5276600	4481800	4263100	3957700	3953600	3809000	3836400	3795700	4492400	4114500
MWSslk254	595.17	287.06	594.158	C27H30O15	[M+H]+	Kaempferol-3-O-glucorhamnoside*	Flavonoids	Flavonols	40437-72-7	1	7073100	5979400	6365900	8794600	9498900	9943200	8983100	9688900	9086100	9303000	8863500	9929900	3261100	4326200	3005300	5595800	6754700	5406500	6201900	4979700	6349100	4883700	5236100	4873100	7578600	4165400	6301700	7320000	8064900	6691800	6419200	6839200	5932300	5889400	6112600	6199100	5261300	5982100	6503100
Hmcp001829	595.16	303.04	594.158	C27H30O15	[M+H]+	Quercetin-3,7-Di-O-rhamnoside	Flavonoids	Flavonols	28638-13-3	3	24629	51844	200920	24628	25469	20540	27880	11512	20430	252270	307460	226620	100150	22977	41858	13100	6568.2	22166	53456	76333	94889	64030	31229	108880	16695	41032	186530	12365	23404	22187	24620	11493	18878	275910	205350	318620	53125	104290	109970
pme1605	593.15	285	594.158	C27H30O15	[M-H]-	Kaempferol-3-O-robinobioside(Biorobin)	Flavonoids	Flavonols	17297-56-2	3	9170600	8708200	9646300	21629000	22987000	22343000	24411000	25270000	24577000	10798000	10698000	12320000	6780100	8448400	5672500	14743000	17976000	14879000	14735000	11913000	12727000	9076100	10953000	8048600	15025000	10108000	10487000	15131000	18008000	17601000	13986000	14898000	15931000	8875800	9376300	9042800	15632000	14564000	13146000
Lmyp003348	601.12	287.06	600.112	C28H24O15	[M+H]+	Kaempferol-3-O-(6''-galloyl)galactoside*	Flavonoids	Flavonols	-	1	4428200	16894000	1076900	208710	184770	214730	171410	167980	170540	4023000	7547000	6574300	18589000	17776000	16308000	73206	76334	74292	89792	6300500	138250	9689600	5185500	263540	14351000	19864000	5218800	61582	73434	64959	70451	53564	51391	3691700	4061800	136900	3311100	3735000	4270200
Lmyp003500	601.12	287.06	600.112	C28H24O15	[M+H]+	Kaempferol-3-O-(2''-galloyl)galactoside*	Flavonoids	Flavonols	-	1	3421700	12237000	759990	170760	172020	177700	204810	155240	210040	4289900	8846300	5121500	19761000	18111000	17474000	77787	53638	77935	76036	6747000	119140	10455000	5233100	180880	13809000	19515000	5457600	64081	62067	65370	72179	59954	46568	4178800	3785500	159790	3217900	4106900	4115200
mws0059	609.15	301	610.153	C27H30O16	[M-H]-	Quercetin-3-O-rutinoside (Rutin)*	Flavonoids	Flavonols	153-18-4	1	7820100	10560000	7728700	29771000	25799000	25566000	27865000	21989000	23560000	13410000	13834000	24145000	4834500	6436100	4685900	13757000	15490000	13296000	15397000	12315000	12932000	6968200	11321000	8225900	9913600	11674000	10239000	23968000	19866000	20494000	20067000	24924000	24216000	16350000	18072000	15325000	13789000	14429000	13977000
pmn001583	609.15	300	610.153	C27H30O16	[M-H]-	Quercetin-3-O-robinobioside*	Flavonoids	Flavonols	52525-35-6	1	9330900	10360000	10724000	30863000	26971000	29237000	29588000	30016000	28732000	21729000	25897000	34590000	5174800	7010800	4624000	18698000	19204000	18391000	14527000	19422000	16400000	7222900	15351000	10569000	14550000	12844000	13716000	24309000	26169000	28569000	19288000	30137000	24414000	24391000	23944000	22615000	19616000	19835000	19783000
Xmyp005599	611.16	287.06	610.153	C27H30O16	[M+H]+	Kaempferol-3-O-galactoside-4'-O-glucoside	Flavonoids	Flavonols	-	3	239590	294700	257550	11785	21106	6265	28411	32847	65489	186890	196810	265950	20669	15888	38044	10703	7323.8	7369	4222.8	20658	5259	30488	7527.5	51652	16201	157440	174700	20169	24406	1959.1	3316.5	17534	25550	9265	111020	44478	18860	85448	70746
Lmsp004166	611.16	303.05	610.153	C27H30O16	[M+H]+	Quercetin-3-O-glucoside-7-O-rhamnoside	Flavonoids	Flavonols	-	1	648580	615020	410460	2215600	1675500	2007100	1945700	2014400	1288100	988870	1484900	1897400	269680	292420	186050	879130	705440	1158100	953840	752280	679300	444440	733570	435220	773670	706900	675800	1292800	1569600	1814200	1591000	1786800	1563600	876620	956200	1066600	890770	1105300	1007700
Lmmp003091	611.16	303.05	610.153	C27H30O16	[M+H]+	Quercetin-3-O-(4''-O-glucosyl)rhamnoside	Flavonoids	Flavonols	59262-54-3	3	712510	607660	384710	2050700	1649400	1708400	1825500	2037300	1424700	942210	1458600	1914000	191570	345660	153270	812260	917700	1101300	929570	876340	686020	404070	760580	485660	866880	874190	748270	1382400	1777300	1622100	2173300	1792300	1728900	925320	876660	765920	914580	1118500	1033000
Lmyn001269	609.15	285.04	610.154	C27H30O16	[M-H]-	Kaempferol-3-O-sophoroside	Flavonoids	Flavonols	19895-95-5	3	392350	389260	268870	178490	191760	168840	143850	174150	159840	290900	189400	209320	298870	381190	283230	199090	202700	245010	293380	360820	336680	257250	259580	310260	365520	372730	235140	329260	361610	343110	279290	313670	329040	559560	497310	454630	256850	264590	355070
MWSHY0199	617.11	303.05	616.106	C28H24O16	[M+H]+	Quercetin-3-O-(6''-galloyl)galactoside	Flavonoids	Flavonols	53171-28-1	1	565540	1292100	101070	57204	45387	37334	34666	60176	44496	387700	599900	851500	4353700	3672400	3211900	24076	15248	23984	35567	1792200	21459	786010	321750	23176	4983200	6595900	1876100	25685	27430	15674	19817	14805	20646	894720	691130	25602	604380	667760	848680
Hmjp002999	625.18	317.06	624.162	C28H32O16	[M+H]+	Isorhamnetin-3-O-rutinoside (Narcissin)	Flavonoids	Flavonols	604-80-8	3	94164	124220	89485	247880	237410	190270	272580	178720	175880	269540	283360	458490	183170	195560	103000	306180	293420	353060	343480	358200	317880	205520	266960	197150	235020	244250	237880	391190	379500	386000	360280	514490	407630	390780	491490	397020	213360	222450	290180
HJN051	623.16	315.05	624.168	C28H32O16	[M-H]-	Tamarixetin-3-O-rutinoside	Flavonoids	Flavonols	-	3	5640	16446	9357.2	25364	22469	29934	22033	25020	17947	23004	9353.5	43103	20719	19937	10000	37200	33543	35550	39646	29101	34477	18041	29103	17760	18142	17268	10433	38434	47021	35668	30174	54200	50792	43134	36243	40889	25639	29880	22344
Lmsp004045	625.18	317.07	624.169	C28H32O16	[M+H]+	Isorhamnetin-3-O-glucoside-7-O-rhamnoside*	Flavonoids	Flavonols	-	2	631350	689800	123050	134350	253190	181680	181430	144020	131220	54257	30235	33150	1308700	1590100	434650	959450	947050	964780	881080	813680	693320	906490	646800	729540	3588100	748520	678480	1652400	2040700	1522400	1660900	1566500	1490800	317150	306000	467910	745060	768500	800500
Lmsp004721	625.18	317.07	624.169	C28H32O16	[M+H]+	Tamarixetin-3-O-glucoside-7-O-rhamnoside	Flavonoids	Flavonols	-	3	110550	129450	122610	261030	238560	255750	251140	281640	187910	251900	315330	691430	243140	268820	106250	302550	269310	408480	398330	324960	342420	222060	300030	201050	311820	243000	221220	423180	362190	337030	278380	450500	390620	478930	379840	450080	283640	309220	300990
Lmmp002963	625.18	317.06	624.169	C28H32O16	[M+H]+	6-C-Methylquercetin-3-O-rutinoside	Flavonoids	Flavonols	-	2	628430	749170	148300	137840	171210	132150	160810	195030	127730	33890	42630	54160	1376000	1741500	456580	1089200	1067000	874680	962840	858860	1076800	992160	895780	840210	4050300	742770	766350	1676500	1775600	1598000	2167200	1551000	1869900	358710	313220	335590	703040	762160	855530
pme1540	625.18	317.06	624.169	C28H32O16	[M+H]+	Isorhamnetin-3-O-neohesperidoside*	Flavonoids	Flavonols	55033-90-4	2	667620	868090	209080	140090	205480	205770	209170	213560	145360	53053	51367	47524	1873800	2199600	497470	1197500	1098200	1063500	998470	916980	1041100	1091000	1185500	924040	4566600	1002200	811390	1883700	2397600	1938900	2147200	2109700	1890300	362680	452130	494960	662330	986290	894450
pmp001311	627.16	303.1	626.148	C27H30O17	[M+H]+	6-Hydroxykaempferol-7,6-O-Diglucoside	Flavonoids	Flavonols	-	2	209480	242830	123960	334760	283250	288710	328440	227840	279990	74504	239350	287780	133000	245640	145900	152270	215130	175570	210760	271460	141270	101010	138760	219230	295630	395340	425590	409920	333780	337500	477300	325760	267530	241620	218720	350280	215310	289330	330970
Lmsp003729	627.16	319.05	626.148	C27H30O17	[M+H]+	Myricetin-3-O-rutinoside*	Flavonoids	Flavonols	-	1	18815000	16130000	10497000	19227000	18546000	17353000	18095000	17952000	17607000	11320000	14422000	15748000	13163000	15794000	11638000	23309000	23268000	22378000	25477000	20998000	22553000	16306000	18903000	15109000	22839000	19429000	15805000	23018000	23540000	22364000	21308000	19845000	21672000	19558000	18514000	17359000	15185000	19413000	18694000
pmp001310	627.16	303.1	626.148	C27H30O17	[M+H]+	6-Hydroxykaempferol-3,6-O-Diglucoside	Flavonoids	Flavonols	-	2	896370	668810	605910	1423700	1324500	1466100	1201800	1243900	942540	532110	790680	921960	756800	552790	628990	1152200	1096600	1324800	1384300	1027300	1078800	796020	982730	629830	958040	1354200	869130	1637300	1437900	1807900	1439500	1817400	1476000	1104500	870160	1116400	1111400	1193900	1031500
Zmdp003457	627.16	319.05	626.148	C27H30O17	[M+H]+	Myricetin-3-O-galactoside-3'-O-rhamnoside*	Flavonoids	Flavonols	-	1	11083000	10940000	5622400	10848000	10240000	10832000	12079000	11209000	9160900	7122200	8373900	8619400	7879500	10011000	6968700	11724000	13562000	14323000	15055000	12630000	16068000	9785700	12409000	9346600	13294000	11055000	8489000	14666000	16292000	13040000	12171000	11963000	14941000	11226000	10471000	12458000	9716700	11110000	11651000
Lmtp003677	627.16	303.04	626.148	C27H30O17	[M+H]+	Quercetin-3-O-sophoroside (Baimaside)	Flavonoids	Flavonols	18609-17-1	3	734600	582680	637000	1593600	1470700	1463900	1466100	1493000	1448000	454080	777570	714420	668300	534920	528000	984900	966110	1025900	935780	1002300	916860	585580	867820	601140	1072800	1280800	868390	1782400	1493800	1489500	1365800	1935500	1561300	906670	926300	845830	931730	938400	1118000
Zmcp002666	627.14	303.05	626.148	C27H30O17	[M+H]+	Quercetin-3,7-Di-O-glucoside	Flavonoids	Flavonols	-	2	509470	533880	326980	369690	95710	458060	217610	359300	243210	700600	726030	611530	231010	170820	237780	144020	207950	304200	240720	414040	166140	181450	255400	322450	570450	497910	485320	186760	274990	390460	371600	397270	257110	366170	641340	301570	287880	401500	352710
Xmyp004678	727.21	287.05	726.201	C32H38O19	[M+H]+	Kaempferol-3-O-(2-O-Xylosyl-6-O-Rhamnosyl)Glucoside	Flavonoids	Flavonols	-	3	267960	363980	388750	385580	394980	461630	467400	436360	339860	258700	200680	232560	269520	248750	388100	260010	306620	330370	251660	245220	293880	223550	272350	188930	299220	276780	270970	325490	365310	331120	288630	246830	209630	216470	209250	174820	281820	270200	295150
mws1035	741.22	433	740.216	C33H40O19	[M+H]+	Kaempferol-3-O-robinoside-7-O-rhamnoside (Robinin)	Flavonoids	Flavonols	301-19-9	2	56056	120620	127970	134970	225260	198710	252890	211710	247300	66600	48426	56490	104820	97669	104950	148250	174780	135890	74262	61012	99977	105390	148280	55866	115060	156340	345560	121290	219790	123620	179950	164170	198930	36132	41552	34928	136730	129340	148460
HJAP061	743.2	303.05	742.195	C32H38O20	[M+H]+	Quercetin-3-O-(2''-O-arabinosyl)rutinoside	Flavonoids	Flavonols	-	3	59844	59158	56583	153640	152360	99854	172000	156570	123240	65037	42815	61991	37468	45116	37444	103030	66940	73906	86617	96032	61074	72197	51212	65238	104510	73746	75102	121050	98451	156330	61958	93146	82759	64336	55664	74074	108230	77810	101990
Xmyp004945	757.22	287.06	756.211	C33H40O20	[M+H]+	Kaempferol-3-O-(6''-Rhamnosyl-2''-Glucosyl)Glucoside (Camelliaside A)	Flavonoids	Flavonols	135095-52-2	1	7220400	6618000	6490700	8196700	7783600	9292700	6468700	7877000	8155400	4750300	3422300	4267800	4873500	5449100	6944900	7186000	7808600	6486000	5246700	4397000	6195700	6410500	6004300	4284300	8922600	7694300	7499400	6937400	7740400	8083800	6365800	6611700	6586500	4941600	5382600	4117700	5065600	4835900	5804000
Lnrp102163	757.21	303.05	756.211	C33H40O20	[M+H]+	Quercetin-3-O-rutinoside-7-O-rhamnoside	Flavonoids	Flavonols	-	2	2626500	9435000	36372000	4027300	3193000	3271500	3227800	2634800	3191200	44308000	45743000	48285000	20610000	2907200	7186000	1967000	2089400	2040400	9405300	14647000	12153000	8809100	4398900	18729000	2377400	7799000	25977000	2804700	4144000	3448100	3042400	2876700	2632200	43759000	41402000	43820000	17439000	18326000	16759000
Lmsp003161	757.22	287.06	756.211	C33H40O20	[M+H]+	Kaempferol-3-O-sophoroside-7-O-rhamnoside*	Flavonoids	Flavonols	-	3	403530	387380	341540	383560	252220	292190	350640	366650	332000	182590	137270	190040	163280	231420	164310	135170	151010	135260	149530	121370	86573	148120	134870	120120	515030	180060	243860	191310	241330	191220	156570	160820	129060	109650	127050	122530	160580	199880	178540
pmp001105	757.22	287.06	756.211	C33H40O20	[M+H]+	Kaempferol-3-O-neohesperidoside-7-O-glucoside*	Flavonoids	Flavonols	-	3	357660	325170	355340	479950	287640	304050	370390	397360	347010	236210	198860	189100	191360	244480	197120	116800	163990	142120	144060	120320	118790	147630	111830	99567	550150	167110	279400	145740	172180	198730	150760	149140	134430	143070	154840	114030	193760	220440	157430
HJAP127	757.22	303.05	756.212	C33H40O20	[M+H]+	Quercetin-3-O-(2''-O-Rhamnosyl)rutinoside	Flavonoids	Flavonols	55696-57-6	1	2224400	9327400	34680000	3618800	3106900	3226800	3192600	3573900	3304000	45921000	44913000	46342000	17917000	2610700	8484000	1643500	2091800	2188700	9454000	12771000	12684000	8526800	3816700	17183000	2262500	6139800	30244000	3082400	3384800	2957500	3190400	2241200	2771500	47174000	35700000	46240000	17983000	16349000	18999000
Lmsp002982	773.21	303.05	772.206	C33H40O21	[M+H]+	Quercetin-3-O-sophoroside-7-O-rhamnoside	Flavonoids	Flavonols	-	3	62309	65178	47709	118530	91844	50369	54822	56690	50290	42585	60992	89351	25786	37389	35577	63275	43320	57269	64745	49101	45651	34056	48287	34151	61020	37763	40000	75772	94643	84530	97812	128210	106280	43526	29004	37174	56490	62544	58545
Lmmp002755	773.21	303.05	772.206	C33H40O21	[M+H]+	Quercetin-7-O-rutinoside-4'-O-glucoside	Flavonoids	Flavonols	-	2	1637300	1171900	1060600	2629300	2644000	2512400	2795100	2736000	2551700	711680	861350	909600	1152200	884860	747950	1576900	1684500	1580200	1828700	1426200	1560600	826300	1638500	888640	1871700	1604400	1611900	2640000	2227200	2190600	2379500	2163200	2294400	1455300	1439400	1246600	1770400	1832100	1824600
HJAP136	919.27	303.05	918.264	C39H50O25	[M+H]+	Quercetin-3-O-(2''-O-rhamnosyl)rutinoside-7-O-glucoside	Flavonoids	Flavonols	-	1	8146	16785	26040	41652	17138	25134	34735	18398	30388	35233	36963	48208	31195	18378	20988	22158	10875	10789	21334	18264	22145	13160	6547	9841	30068	49423	40701	42290	34816	26691	33652	23498	19110	24684	18185	16137	18831	28609	27955
mws0040	255.07	153	254.058	C15H10O4	[M+H]+	Chrysin	Flavonoids	Flavones	480-40-0	2	886680	803220	588310	1361400	1400700	2228400	1259400	1079700	1439500	1192400	1049900	1054000	4875.7	8751.3	3051	4269	10102	9553.5	6706	30525	10695	4317.6	23568	3643.8	9305	10166	11539	8588.1	15166	21834	8303.8	6255.6	15056	12358	14060	9866.5	366840	387650	346090
MWSHY0192	269.08	226.07	268.074	C16H12O4	[M+H]+	Tectochrysin	Flavonoids	Flavones	520-28-5	2	38419	29136	25375	51752	51258	65628	49641	44313	57207	47888	37271	46203	9	9	9	9	9	9	9	9	9	9	9	9	9	9	9	9	9	9	9	9	9	9	9	9	12042	14918	20025
MWS20151	271.06	153.02	270.053	C15H10O5	[M+H]+	Apigenin	Flavonoids	Flavones	520-36-5	1	29234	20394	42267	49932	51069	54952	52251	49321	56306	31256	34562	29300	33739	32350	38468	44786	22088	49192	35085	37061	43472	56127	61262	44985	58437	62720	58766	54193	56573	63964	69914	57187	62355	54343	63807	46404	34992	47797	51133
Lmyn006227	269.05	151	270.053	C15H10O5	[M-H]-	Galangin (3,5,7-Trihydroxyflavone)	Flavonoids	Flavones	548-83-4	1	30108	35309	50011	67073	78589	90653	71939	67727	85073	49181	32652	42861	56442	47880	60678	61221	41214	71799	51010	51825	64110	72419	88606	60787	64692	84258	90285	98942	98591	92298	86849	100410	89172	64221	75293	73111	56855	60871	59461
Lmgp004784	275.09	139.04	274.084	C15H14O5	[M+H]+	Apiferol	Flavonoids	Flavones	55167-29-8	2	1926500	1272700	1758700	861710	994850	723490	1077400	930550	850830	1648500	1476500	1206200	1060400	1117900	1056400	1534300	1101800	1257500	1521100	1412500	1178400	1608700	1262700	1170900	872050	924160	914620	885320	805640	864500	596230	703350	536170	1364700	1152500	1236400	976730	1036700	1099400
Hmbp002730	287.06	153.01	286.047	C15H10O6	[M+H]+	Isoscutellarein	Flavonoids	Flavones	41440-05-5	2	25559	25998	38409	58788	84705	67845	72513	78155	71230	59989	32522	38315	35415	26016	66878	112510	122660	105770	142480	85511	118070	83061	144760	77905	67117	95530	66631	131280	104200	125860	143890	172500	176580	89951	77580	64016	58420	59680	64270
pme0088	285.04	151	286.048	C15H10O6	[M-H]-	Luteolin (5,7,3',4'-Tetrahydroxyflavone)	Flavonoids	Flavones	491-70-3	2	64251	61504	129130	232740	281360	284700	266110	290670	263900	47707	46984	41173	128530	106920	121190	488110	414850	478590	465410	381850	426070	294030	504810	278420	113210	181590	185370	630320	504470	591050	495710	652070	504660	184560	168560	140640	223590	217990	257310
pmp001204	299.09	284.1	298.084	C17H14O5	[M+H]+	Apigenin-7,4'-dimethyl ether	Flavonoids	Flavones	5128-44-9	3	8404.7	10425	16066	8977.8	5889	8244.5	7232.3	7707.6	21053	9697.5	8268.8	10588	18910	18276	18256	1846.7	1637	1679.3	1255.5	3126.2	2674.9	3738.5	3156.7	3177.5	13844	10601	30408	8220.1	12071	14267	7898.9	7782.6	8445.5	12985	9779.1	14071	10096	8160.6	12529
Zmhp003514	301.07	286.05	300.063	C16H12O6	[M+H]+	6,7,8-Tetrahydroxy-5-methoxyflavone	Flavonoids	Flavones	-	3	101800	81746	81445	165740	179740	237760	161040	134970	180140	173080	136810	151150	13586	7785.7	15528	3631.6	8725.6	10043	12583	15031	12619	15603	9855.7	9821.3	13045	9539	11093	8188.3	12949	20446	10289	6522.7	5085.7	28060	37382	32697	50903	46311	53431
pmp000001	301.07	286.05	300.063	C16H12O6	[M+H]+	Hispidulin (5,7,4'-Trihydroxy-6-methoxyflavone)	Flavonoids	Flavones	1447-88-7	3	28990	35733	38155	85545	86522	92406	82244	88822	89059	41287	45896	50236	49907	38007	33382	114100	104320	138750	95992	87935	110140	69245	110270	80582	52124	74338	69152	208250	174960	168040	189940	246720	199940	67352	68877	68716	79536	87286	87558
mws0920	301.04	151	302.043	C15H10O7	[M-H]-	Tricetin (5,7,3',4',5'-Pentahydroxyflavone)	Flavonoids	Flavones	520-31-0	3	2552500	2597400	4760500	2568400	3450400	3210600	3702700	3434600	3195100	2570500	1986900	2184000	5779300	5153700	4787100	6765900	6244900	7011100	6006200	6062400	6413000	5927900	5991300	5143200	4453600	5540800	6228800	5758600	5462800	6115600	5751500	6351900	5022600	5534800	5367400	5018600	3768800	4439700	4810400
Lmbn006032	301.04	149.02	302.043	C15H10O7	[M-H]-	Hypolaetin	Flavonoids	Flavones	27696-41-9	3	2164400	2427100	4011500	2874000	3697900	3140800	3595500	3527800	3316400	2137700	2123200	2070300	4779600	5019800	4753700	6056800	6308700	6739700	6148600	5420200	6507400	5408200	6574900	5780100	3980800	5680500	4747900	5222900	4891400	5111500	5455600	6781900	5715500	5562600	6006100	4734000	4664800	4258800	4875300
pmp000003	317.07	302.04	316.058	C16H12O7	[M+H]+	Nepetin (5,7,3',4'-Tetrahydroxy-6-methoxyflavone)	Flavonoids	Flavones	520-11-6	2	139700	113680	126280	374050	495930	449470	471620	461970	395260	48334	42931	33180	227730	159730	186940	600360	461350	592630	451250	385940	464550	430020	545800	360010	238690	278640	263540	781080	652300	646560	764090	938050	803540	143680	124010	120140	349530	349040	325100
Lmzp004885	331.08	315.05	330.074	C17H14O7	[M+H]+	Tricin (5,7,4'-Trihydroxy-3',5'-dimethoxyflavone)	Flavonoids	Flavones	520-32-1	1	164400	142020	168490	299430	380310	376020	382040	363320	352590	45480	37635	36581	345170	243520	273530	892790	726340	833350	572030	464150	626560	452480	610670	343290	497860	473990	452000	634670	533790	495910	593570	802660	727040	138460	132700	127870	333440	360990	367700
pmp000004	331.08	316.06	330.074	C17H14O7	[M+H]+	4',5,7-Trihydroxy-3',6-dimethoxyflavone (Jaceosidin)	Flavonoids	Flavones	18085-97-7	3	81156	74080	86805	152720	203920	211050	177880	207990	184340	18890	14857	16122	171320	142280	136600	505080	392730	450190	274170	243390	316410	233130	283710	175760	228650	248960	230000	311670	259800	255670	284100	427930	368430	66587	69976	62383	173950	171360	176370
Lmtp004722	333.06	153.02	332.053	C16H12O8	[M+H]+	Mearnsetin	Flavonoids	Flavones	16805-10-0	2	730200	1065400	834090	344890	364440	276180	345170	343870	306840	558190	625980	352330	467930	359210	439240	289020	318830	318090	298940	241490	206840	297810	214570	159500	746690	616860	553180	993290	1012600	552410	1067900	1109800	713340	496750	480900	531000	636770	445420	409370
Lmsp009872	343.12	299.09	342.11	C19H18O6	[M+H]+	5,7,3',4'-Tetramethoxyflavone	Flavonoids	Flavones	855-97-0	3	104870	63370	93424	45520	52198	56904	58603	50794	54855	55752	65206	71339	241310	230950	244510	94866	88392	86357	76054	104250	91129	116440	89172	94645	248580	247340	260260	90679	76382	65505	92515	96248	81610	129240	118910	107080	86571	110470	103160
MWSHY0118	343.12	282.09	342.11	C19H18O6	[M+H]+	Scutellarein tetramethyl ether	Flavonoids	Flavones	1168-42-9	3	42436	25213	43447	20481	21908	25172	25480	26241	28357	25687	24313	29591	107270	104710	110440	41505	43191	37589	32442	47785	40138	48655	37070	41940	108810	99814	103030	29690	27923	28108	39702	43502	34788	54253	50203	46576	38960	43947	47630
pmp000008	359.11	344.08	358.105	C19H18O7	[M+H]+	5-Hydroxy-6,7,3',4'-tetramethoxyflavone	Flavonoids	Flavones	21763-80-4	2	4157600	2461800	1801100	9471400	10961000	10868000	10528000	11653000	10295000	1653000	1702800	1589300	10794000	9505700	9381600	22615000	22958000	18148000	16112000	15960000	17408000	17394000	16277000	11747000	7839700	7061700	8154200	15752000	16586000	14845000	18494000	16366000	15429000	3055400	3252700	2607900	9848600	11562000	10849000
mws0055	373.13	343.09	372.121	C20H20O7	[M+H]+	Tangeretin (4',5,6,7,8-Pentamethoxyflavone)	Flavonoids	Flavones	481-53-8	3	241160	268770	234590	258610	242570	237680	246900	271000	240990	273670	265960	276620	227180	246740	270850	224870	218300	227870	240290	224310	227330	213970	236560	224390	223930	215890	209230	228860	216890	224950	214560	220020	219790	222780	220470	233130	233660	238250	241420
mws0043	403.14	373.1	402.131	C21H22O8	[M+H]+	Nobiletin (5,6,7,8,3',4'-Hexamethoxyflavone)	Flavonoids	Flavones	478-01-3	3	169930	197940	186440	189890	188570	175610	182280	188150	183160	207710	204690	197100	169450	179270	282200	158100	171950	170360	164810	165150	154380	161100	156720	173080	168030	158940	161470	162340	167210	150070	158940	163390	163980	162840	168060	170110	177170	173070	168020
pmb0580	417.1	255.1	416.111	C21H20O9	[M+H]+	Chrysin-5-O-glucoside (Toringin)*	Flavonoids	Flavones	1329-10-8	3	58496	56816	68175	136990	121120	128660	145590	115630	141780	273520	267800	269540	24295	22368	31841	38512	32201	47285	71432	82380	70634	101620	53695	156570	20341	15145	24631	33182	36650	47757	30024	31460	32466	160640	158040	169210	76551	85313	75592
Lmyp005841	417.12	255.06	416.111	C21H20O9	[M+H]+	Chrysin-7-O-glucoside*	Flavonoids	Flavones	31025-53-3	3	58511	58100	61492	143520	156340	134130	163660	118790	152630	265500	285900	254960	24992	33216	41608	34174	36390	38550	80208	89736	75681	103160	56472	165220	32187	11882	22989	23665	35172	27947	27558	32591	28382	166720	170680	196200	72247	94452	79186
MWSHY0189	433.11	271.07	432.106	C21H20O10	[M+H]+	Apigenin-7-O-glucoside(Cosmosiin)*	Flavonoids	Flavones	578-74-5	1	3475600	3972500	4067900	5907600	6112300	5921000	5642200	6689800	5961100	14494000	12259000	12219000	8379000	10585000	7175700	7046000	5846600	6599500	8665000	16902000	12790000	12999000	8258800	24533000	8427800	6764100	8479800	5073800	5167000	5034400	5717700	5204700	5323900	29714000	33690000	34192000	8117000	10150000	9639900
MWS20148	433.11	271.07	432.106	C21H20O10	[M+H]+	Apigenin-3'-O-α-D-glucopyranoside*	Flavonoids	Flavones	-	1	3617100	4495900	5131400	5714100	6424100	6333600	6164000	4942100	6150300	14557000	11062000	11620000	8859800	11306000	6953600	6225900	5560400	6624300	8861900	16025000	12091000	12640000	8701600	26161000	7714900	6013700	8167600	4794000	4806000	5092900	5728700	5332100	5072000	29922000	29990000	34650000	9550700	11214000	10244000
Lmlp005572	433.11	271.06	432.106	C21H20O10	[M+H]+	Galangin-7-O-glucoside	Flavonoids	Flavones	-	3	3386300	4313400	4277000	5186500	6972500	6251600	5909300	5529900	5932200	14100000	11944000	12399000	8225000	10750000	7836000	5964900	6036600	6095800	9254000	15657000	11606000	12133000	7863000	25345000	7951400	6179500	7560700	5411800	5072500	4999600	5500800	5177600	5404800	33233000	34927000	34215000	9203200	9908700	9308800
mws0072	433.11	271.01	432.106	C21H20O10	[M+H]+	Apigenin-5-O-glucoside	Flavonoids	Flavones	28757-27-9	3	141860	110260	198020	234300	237310	149850	229040	286510	265930	91328	53203	92370	342660	322740	252180	464870	345390	499660	373250	269920	324490	340760	560510	338090	279920	374510	481760	481040	345450	333460	388330	584920	483190	246000	246740	168360	216860	253040	321960
pmp000573	447.13	285.08	446.121	C22H22O10	[M+H]+	Acacetin-7-O-galactoside*	Flavonoids	Flavones	-	1	209760	191970	459700	16813	10300	9538.8	6959.1	10977	9768.2	155500	117300	123970	764170	657670	502410	16573	11283	14170	46050	85172	60311	123360	41197	169280	219090	251540	641210	11345	8982.5	7743.6	9723	12354	13082	280050	288030	275580	124270	134600	132940
pmp000575	447.13	285.18	446.121	C22H22O10	[M+H]+	Acacetin-7-O-glucoside (Tilianin)*	Flavonoids	Flavones	4291-60-5	1	90256	79536	138570	9782.2	8360.1	7140.1	9168.5	992.62	2931.6	64295	37817	56810	311890	233620	192880	8437.6	3172.6	6086.7	18258	32901	27729	46755	14956	74800	89413	99147	276220	1633.1	1838.7	6212.6	6071.2	4484.7	1067	124790	116580	115880	47937	51871	56861
Hmpp003270	449.11	287.05	448.101	C21H20O11	[M+H]+	Luteolin-4'-O-glucoside	Flavonoids	Flavones	6920-38-3	3	4828900	6786500	5748200	5209600	5252400	5180300	5295900	4433300	5021800	5454600	5561400	5414300	4269400	3365100	3789300	2132600	2298400	2263900	2789900	2904300	2634200	2750200	2526300	2916700	4695000	5303700	4251900	2628900	2994800	2788900	2797600	2865000	2910400	4527900	4398500	4372700	4308100	4004600	3656100
MWSHY0104	449.11	287.06	448.101	C21H20O11	[M+H]+	Luteolin-7-O-glucoside (Cynaroside)	Flavonoids	Flavones	5373-11-5	1	2482600	3147900	2260500	1495400	1587300	1467100	1424200	1106100	1582200	2764100	2907000	3124500	1983900	1466500	1875200	665740	724960	668390	882410	1023500	1042700	1080500	929800	940430	1584000	1962200	2281000	617070	1030600	903040	1022400	782410	942010	1832600	2806200	2793800	1905600	1659900	1094800
pmp000577	461.12	285.08	460.116	C26H20O8	[M+H]+	Acacetin-7-O-glucuronide	Flavonoids	Flavones	-	3	16537	24788	25245	23669	31421	25843	29680	29242	22107	24946	27980	25109	18328	22099	24901	25412	22339	19222	24424	20105	25705	18787	10619	26093	213800	24612	20347	21907	23802	16726	17970	16211	14310	20681	16785	17018	28149	37935	31740
pmb3012	461.11	299.2	462.116	C22H22O11	[M-H]-	Chrysoeriol-7-O-glucoside	Flavonoids	Flavones	19993-32-9	3	30984	27226	42685	50828	37936	38616	34034	45128	37708	40245	66710	77367	37098	40826	31398	74502	55761	84618	82521	103920	64472	63439	64253	67809	26885	35202	39363	75581	40097	53479	53542	84786	67051	186420	226360	192110	50922	83600	79686
Cmyp002064	463.12	301.08	462.116	C22H22O11	[M+H]+	Yuanhuanin	Flavonoids	Flavones	83133-14-6	2	529380	934600	962660	2090000	2161000	2357200	2332900	2433200	2201100	1590600	1763600	2156900	1087700	1344900	1007700	2555700	2113000	3017600	2422000	2805100	2771600	1822700	2575300	2386800	1181800	1103300	1327100	3452100	2205800	2640000	2609500	4500700	3724700	3425600	3235300	3370400	1933800	2092800	1799300
Lmjp003655	463.12	301.08	462.116	C22H22O11	[M+H]+	6-C-MethylKaempferol-3-glucoside	Flavonoids	Flavones	-	1	582780	681330	985120	2200600	2054700	1910000	2170400	2158800	2031400	1453500	1905600	2309900	1426600	1239800	1011700	2628400	1850300	2796100	2431700	2569600	2779100	1651800	2395700	2192100	1373800	1272800	1334300	2909500	2477700	2363300	2749300	4286000	3559000	3501100	3250800	3683800	2152600	2079400	2077500
pmb2999	461.11	299.1	462.116	C22H22O11	[M-H]-	Chrysoeriol-5-O-glucoside	Flavonoids	Flavones	-	3	10736	18726	4704.2	19224	18355	17671	15618	31995	9413	16708	17388	12088	14346	10018	13320	7982.8	9988.2	2327.8	3331.2	16646	8645.8	5311.5	9294.2	7655.8	20600	17286	19298	13123	14624	12663	18018	20572	17338	9286.2	13967	17863	18214	16266	12735
Hmgp002189	463.13	301.07	462.118	C22H22O11	[M+H]+	Hispidulin-7-O-Glucoside	Flavonoids	Flavones	17680-84-1	3	559490	707260	917840	1984700	2048900	2222300	2115000	2122200	2001600	1600700	1656700	2358300	1426900	1272200	1015400	2292600	1945800	2703600	2004500	2667800	2559400	1727500	2671000	2292100	1072300	1185700	1384400	3263300	2693500	2647400	3049300	4173300	3336300	2571600	3430000	3509700	1860000	2092900	2096000
Hmcn001884	463.09	301.03	464.095	C21H20O12	[M-H]-	6-Hydroxyluteolin 5-glucoside	Flavonoids	Flavones	-	2	11519000	15747000	9773200	18373000	16242000	15318000	19452000	14288000	14589000	10345000	13468000	12979000	11158000	5201000	7327400	9823400	10333000	10488000	8859900	10593000	10828000	5240400	7407100	6013900	13540000	17298000	12306000	20585000	13392000	16285000	15415000	20406000	15984000	12788000	15811000	14423000	13935000	14658000	12640000
pma6640	479.3	317.1	478.111	C22H22O12	[M+H]+	3'-O-Methyltricetin-7-O-glucoside	Flavonoids	Flavones	-	3	371290	197600	250350	1195800	1477900	1320000	1411000	1522100	1382700	183170	222270	114130	848320	707870	572960	2399400	2204900	2449100	2042700	1379600	1692700	1987600	2635200	1533900	646810	489630	525040	2057300	1932000	2095300	1910300	2767600	2216300	370890	303500	312260	1045300	1188100	1069800
Hmgp002036	479.12	317.06	478.112	C22H22O12	[M+H]+	Nepetin-7-O-glucoside	Flavonoids	Flavones	569-90-4	1	469370	422920	394220	1905400	2334500	2261100	2115300	2350500	1677900	200850	337970	179700	930970	940000	1153800	3537500	2863300	4080900	3043000	2112700	3156800	3199500	3845700	2237000	941030	797930	878150	3004700	2684300	2924200	3024600	3237000	3357300	574380	387250	470290	1535800	1507500	2022700
pmb0736	493.13	331.08	492.127	C23H24O12	[M+H]+	Tricin-7-O-Glucoside	Flavonoids	Flavones	32769-01-0	1	287010	257370	166250	540100	586510	763740	585770	821140	690560	215720	210640	342350	1342100	867520	661960	1972900	1717500	1823300	927000	1515100	1614100	942130	1848300	1106000	1044500	643450	847820	2381800	1496500	1459700	1880500	2134800	2577000	999540	1025800	1010400	932110	1404400	893660
Hmgp002238	493.14	331.08	492.128	C23H24O12	[M+H]+	Jaceosidin-7-O-Glucoside	Flavonoids	Flavones	25474-11-7	2	2039400	1960200	2323200	7969800	9155700	9514800	9607800	9454100	9646200	950800	737170	722040	6834700	6002000	5267400	24190000	19853000	19379000	16426000	13437000	18456000	16479000	19687000	11428000	6399500	5748500	5391200	16931000	14963000	14975000	15520000	20649000	18814000	3389700	3378700	3563700	8833500	10824000	11418000
pmb3045	505.1	329.1	506.106	C23H22O13	[M-H]-	Tricin-7-O-Glucuronide	Flavonoids	Flavones	-	3	5351.9	3597	1907.2	55026	50703	59405	48954	75673	66793	9	9	9	10788	6432.5	7101.8	161560	193520	211870	177890	117960	154130	99129	160940	63059	14809	20541	21160	206150	168670	173480	203560	168390	166730	13346	8832.8	3641	56784	44934	86538
pmb3041	521.09	329.2	522.101	C23H22O14	[M-H]-	Tricin-7-O-saccharic acid	Flavonoids	Flavones	-	3	296570	321310	196580	423670	461150	493840	431900	419670	416420	188130	243600	247450	422930	331790	293740	446420	278090	389630	327750	406150	448540	276420	294980	203940	368300	266220	269460	440680	452910	523880	410570	440740	407410	232200	305380	219940	376800	355880	413940
Zmgp005070	523.14	361.09	522.137	C24H26O13	[M+H]+	Centaurein	Flavonoids	Flavones	35595-03-0	2	106940	78612	48704	71171	92379	113340	81170	107930	88140	68663	60102	79262	191950	168920	198620	100710	98873	98017	105720	96803	100330	150160	100640	120760	101740	131310	144510	49717	73918	73723	69690	47979	58374	45664	39489	81932	67488	98336	90775
pmb0746	527.15	331.08	526.148	C27H26O11	[M+H]+	Tricin-4'-O-(guaiacylglycerol)ether	Flavonoids	Flavones	-	3	8473	7769.3	7592.3	6866.4	7787.2	10903	16395	8229.9	8309.7	4559.6	4149.3	6733.2	37401	17434	22948	29945	18639	26728	16236	23370	25091	22479	23930	10959	32657	33793	25680	27522	26726	20475	20452	31112	24936	14747	17970	14729	16192	14695	18770
Lmpp003930	579.15	271.06	578.142	C30H26O12	[M+H]+	Apigenin-7-O-(6''-p-Coumaryl)glucoside	Flavonoids	Flavones	-	2	596070	195940	285050	863910	875770	795800	885370	1138600	1018800	237610	160280	228480	1677400	663200	915920	2213200	2394100	2265500	1924800	1437200	2040500	2312700	2588800	1431000	477810	614330	897960	1828600	1115300	2158900	1251600	1249600	1365500	336830	432070	342380	958860	1279400	1249400
pme0368	579.17	271.01	578.164	C27H30O14	[M+H]+	Apigenin-7-O-rutinoside (Isorhoifolin)	Flavonoids	Flavones	552-57-8	3	2430400	4532400	2401900	148070	954570	434770	258990	257690	281830	2750100	1761400	1658400	9053600	12429000	6851100	1893200	2129400	2042300	3845500	4747400	3693100	4761800	3407000	5228000	7005000	9495500	7042600	4018300	6543200	4181200	5055000	3666900	4393500	6028400	7948900	6734700	2893600	3827300	4075100
MWSmce498	579.17	271.07	578.164	C27H30O14	[M+H]+	Rhoifolin	Flavonoids	Flavones	17306-46-6	2	738700	156030	565710	984760	930510	845080	879340	1197000	868910	179490	200800	263330	1397900	1280600	1087600	3813800	3232400	3287300	2609900	2002200	2584100	2487900	2921600	1186700	713050	638550	720900	1976900	1525500	1778500	1120100	1687000	1955700	379660	385030	380710	730870	732390	983260
Hmjn004446	593.13	285.04	594.137	C30H26O13	[M-H]-	Luteolin-7-O-(6''-caffeoyl)rhamnoside	Flavonoids	Flavones	-	1	4275400	6138500	1907900	3086600	2725400	3423600	3022100	2175900	2732400	7370700	8448700	7134300	13188000	7664300	10538000	2258900	2910500	3155800	3132500	7784100	3069500	5187700	3422700	3167600	14774000	15033000	9351000	4785400	4665900	4856900	3847700	3717900	4022300	8519800	9524800	5570900	5820200	6029000	5857300
MWSHY0080	595.17	287.06	594.158	C27H30O15	[M+H]+	Luteolin-7-O-neohesperidoside (Lonicerin)	Flavonoids	Flavones	25694-72-8	1	4243100	4492700	3033500	7381800	8071200	8012000	7069300	7807600	8415700	3481900	4566400	4584300	2654300	3630200	2190800	6323700	5734300	5714600	5975500	4525600	4708800	4265100	4889000	3457000	6145000	4252200	4296400	6977600	6658400	7422100	5912600	6394300	5807700	3864500	3856500	4549200	4137700	4726100	4575500
pmp000593	595.17	449.1	594.158	C27H30O15	[M+H]+	Luteolin-7-O-rutinoside	Flavonoids	Flavones	3563-98-2	3	30348000	33586000	36644000	46881000	44780000	38349000	49959000	41933000	46802000	45039000	45809000	51704000	21949000	21220000	18368000	23808000	36703000	26765000	29267000	27722000	29930000	26000000	24581000	20100000	29630000	24090000	27602000	33088000	32663000	33819000	31008000	29617000	26243000	26016000	33772000	28047000	33116000	32757000	32501000
Hmmn004152	595.17	459.11	596.174	C27H32O15	[M-H]-	Neoeriocitrin	Flavonoids	Flavones	13241-32-2	2	83783	27956	12646	35718	14020	13962	28703	23613	26595	3341.5	6648.5	5320.2	85780	43875	31278	33200	26612	26450	22479	18447	23228	23243	18961	17884	18518	31919	29783	23917	23284	35242	43215	34239	38522	2659.5	12483	3949.5	24709	34113	32565
Hmpp002612	611.16	287.05	610.153	C27H30O16	[M+H]+	Luteolin-7-O-gentiobioside	Flavonoids	Flavones	-	3	6217200	4825600	6246400	5973200	5174500	5239500	5497100	5072400	5748200	3892100	4078900	3772400	3633900	3072900	3352600	3228500	3631400	3146700	3035200	2724000	3043300	3059900	2992600	2750100	3943500	3606500	4374700	3114800	3700900	2807600	2687700	2688300	2652900	2374200	2285300	2378600	3384300	3580000	3503800
Zmxp003107	611.16	287.06	610.153	C27H30O16	[M+H]+	Luteolin-7,3'-di-O-glucoside	Flavonoids	Flavones	52187-80-1	3	5881900	4490500	5720100	5862100	5296600	5796800	5233100	5449400	5453700	3802400	3385700	4012900	3743600	3098500	3400600	3368800	3657100	3321800	3260500	2794100	3297400	3131200	2933400	2950800	3403100	3351200	4168100	3021700	3304300	3203500	2992600	2554400	2575800	2332800	2404000	2529500	3276500	3688900	3477600
Zmxp002867	625.17	301.07	624.168	C28H32O16	[M+H]+	Chrysoeriol-5,7-di-O-glucoside	Flavonoids	Flavones	-	3	29070	9510.9	3489.5	68444	54510	71458	46597	52403	31316	3464	2099.8	1389	7812.8	17142	12850	90218	116360	114500	102630	83617	75062	51490	96807	38562	11225	14071	23299	103950	112220	94619	74614	82493	107480	5606.5	9	1820.2	26673	65092	50510
Zmxp004480	625.18	301.07	624.169	C28H32O16	[M+H]+	Chrysoeriol-7-O-gentiobioside	Flavonoids	Flavones	-	3	28340	9953	4157.5	5039.8	22204	14237	23315	29571	17478	1663.5	4092.5	6621.7	10067	16270	7876.2	51245	50807	51687	31247	24985	39986	31680	41638	30070	20084	13317	9153.2	49598	20792	57409	33988	35839	47663	14112	8405	6663.8	23246	26619	28334
Hmlp003068	627.15	303.05	626.148	C27H30O17	[M+H]+	Meratin	Flavonoids	Flavones	27215-04-9	2	252510	554200	344240	242040	246040	520590	237000	321930	299500	527150	1010300	607370	185140	216740	411690	182370	379980	347410	311750	458350	274660	324380	353520	271190	560470	608410	387650	171710	419080	554050	237960	231880	151260	520060	592530	336270	179620	353610	371630
Hmgp003086	639.19	331.08	638.184	C29H34O16	[M+H]+	Tricin-7-O-rutinoside*	Flavonoids	Flavones	-	3	11372	14692	10693	27681	60870	61829	61436	51829	71321	3748	6281.8	3866.2	82649	73518	58764	293050	281040	211430	266640	180670	227970	217560	232730	142050	88854	84798	80596	232880	126710	198530	192870	223090	209890	9168	12213	12648	82414	113490	114350
Lmgp004959	639.19	331.08	638.185	C29H34O16	[M+H]+	Tricin-7-O-neohesperidoside*	Flavonoids	Flavones	53766-40-8	3	11819	10592	6021	25138	33426	34636	41895	31691	29056	6728.8	10448	4915.3	32781	25079	36764	167160	166860	135980	117330	95870	130800	88420	117710	68108	17545	28174	29996	110990	81030	127590	98424	83905	83746	22997	13190	20712	63015	50642	66955
pmb0713	655.19	331.08	654.18	C29H34O17	[M+H]+	Tricin-7-O-(2''-O-glucosyl)glucoside	Flavonoids	Flavones	-	3	5316.5	2315.2	2879	5244.8	10470	10314	13670	9724.2	7503.5	3005	740.25	1543.5	7530.2	3673.8	5404.6	24582	14429	30827	20381	17273	19612	14614	22738	11032	9796	5279.2	14212	22206	13779	21153	20022	23994	9161.5	18118	9630	5319.2	9058.5	12039	11328
Zmlp003063	741.23	433.12	740.209	C33H40O19	[M+H]+	Luteolin-7-O-(2''-O-rhamnosyl)rutinoside	Flavonoids	Flavones	-	2	34722	60304	83945	161340	171280	172750	169560	159080	159160	13908	24281	33269	146640	112620	49362	200400	129240	156570	106760	84705	149540	156090	100850	69814	73421	141360	386710	143680	165250	178880	142470	183870	134250	37689	50066	53388	135680	90622	122610
Hmmn003584	739.19	593.14	740.209	C33H40O19	[M-H]-	Luteolin-7-O-rutinoside-5-O-rhamnoside	Flavonoids	Flavones	-	1	59925	81030	31560	98364	115190	105650	104840	109450	96776	168130	154910	163370	142870	143580	150240	247940	225370	281230	210830	222240	226700	204340	254770	173090	256580	211710	139150	233750	286970	223070	217120	224090	198490	244060	227690	201480	165740	173090	157050
pmb2991	739.21	269.2	740.216	C33H40O19	[M-H]-	Apigenin-7-O-glucoside-4'-O-rutinoside	Flavonoids	Flavones	-	3	11986	26634	107910	9	9	9	9	9	9	169870	145180	159420	61323	16287	13959	9	9	9	37181	48351	54491	69121	22637	112140	6605.8	13963	86308	9	9	9	9	9	9	123540	142220	170560	41513	64138	40594
Hmdp103165	741.22	287.06	740.216	C33H40O19	[M+H]+	Clitorin	Flavonoids	Flavones	55804-74-5	2	53659	89528	94128	187260	154880	185310	165270	171060	156840	53394	14233	55568	95181	72526	70036	105320	141570	123160	106870	74350	86432	114310	84262	34694	94146	80626	209840	150620	175260	141240	200730	211240	161840	46562	35805	32342	121240	96615	124900
mws0255	112.05	95	111.043	C4H5N3O	[M+H]+	Cytosine	Nucleotides and derivatives	Nucleotides and derivatives	71-30-7	2	111620	56595	88920	123870	112740	83963	103230	101520	88234	96377	100320	123750	97133	99662	91396	103730	112190	122170	123380	75325	82979	82935	76843	55138	114630	200590	120990	167850	196480	135330	117780	128510	110110	95456	129610	118290	81520	97239	86139
MWS5173	112.05	70.03	111.043	C4H5N3O	[M+H]+	Isocytosine	Nucleotides and derivatives	Nucleotides and derivatives	108-53-2	2	353360	521900	679900	1725300	1705300	1631800	2752400	5121200	2826100	1526500	1691400	2898800	614100	550260	802850	1758500	3282800	2394100	2223200	1080700	1062800	1370500	2337500	1857600	323880	388100	494090	1622400	1810400	2032700	2450300	2240000	2124100	474250	534680	565560	2075400	1842700	1756400
pme0257	111.02	80	112.027	C4H4N2O2	[M-H]-	Uracil	Nucleotides and derivatives	Nucleotides and derivatives	66-22-8	3	69518	62805	56321	48060	47939	60149	48566	36324	48630	94804	97176	89002	74934	85484	91671	83306	61812	53272	104070	62378	75428	90366	52509	77758	80146	83436	67691	36724	87806	65780	72780	72950	85638	111630	86297	58271	94315	64248	74352
pme0040	136.06	119	135.054	C5H5N5	[M+H]+	Adenine	Nucleotides and derivatives	Nucleotides and derivatives	73-24-5	1	4989500	4211500	5102600	8280300	7766200	7432800	7974700	6195500	5712000	4646100	4577900	6109600	3125700	3853700	4214400	5913700	5406500	5631300	5058100	3919300	4419600	3763100	4727100	3528300	4372900	4404900	3459900	4602200	4767600	4965500	4077100	4152100	3848500	2778300	2199800	2349000	4911400	4643000	4137300
mws0847	150.08	133	149.07	C6H7N5	[M+H]+	1-Methyladenine	Nucleotides and derivatives	Nucleotides and derivatives	5142-22-3	2	200660	263430	141330	242500	325570	236290	292260	231090	291520	107620	180430	227090	202410	143260	205090	248300	350640	398260	268370	302510	296330	241190	290450	191380	167240	204850	203550	258370	194220	373390	298030	370960	240310	109950	86798	123240	229600	210660	157180
pme1109	152.06	135	151.049	C5H5N5O	[M+H]+	Guanine	Nucleotides and derivatives	Nucleotides and derivatives	73-40-5	2	384110	152870	401550	583080	485960	391960	364150	366950	387780	498530	406000	450040	149750	178850	170890	139500	324120	179620	180310	114110	165960	186820	206910	111930	417850	767150	300740	584350	873820	460830	197870	485280	198790	287850	194540	202690	354450	291190	266630
pme0256	151.03	151	152.033	C5H4N4O2	[M-H]-	Xanthine	Nucleotides and derivatives	Nucleotides and derivatives	69-89-6	3	21753	19981	39077	17591	17249	20089	31570	26273	35597	25187	13959	20019	19789	11882	28173	15278	215520	15844	29491	24387	24220	11958	21050	16707	22810	22096	16464	23962	43423	24693	19352	31657	55345	25896	29614	13866	32433	56137	31322
MWS2984	153.05	136.03	152.045	C4H4N6O	[M+H]+	8-Azaguanine	Nucleotides and derivatives	Nucleotides and derivatives	134-58-7	3	41869	25484	36699	49542	43694	37705	54196	28968	31952	33574	41861	50163	18076	25402	14484	19375	144000	21366	22667	16751	21278	18881	18403	11313	52576	70293	38334	63671	76619	54811	40857	43881	34892	35886	34553	28974	28962	30400	29113
MWSslk102	155.01	119.04	154.005	C5H3ClN4	[M+H]+	6-Chloropurine	Nucleotides and derivatives	Nucleotides and derivatives	87-42-3	3	30177	34518	18097	32823	22494	22903	23580	30022	21978	23756	22416	42210	24164	28564	28024	37191	28445	31780	23552	18593	37525	32426	33001	15740	29200	19399	22372	30152	25594	28472	19742	26736	36824	28476	20606	24098	23840	29562	26492
MWS4525	166.07	124.05	165.065	C6H7N5O	[M+H]+	6-O-methylguanine	Nucleotides and derivatives	Nucleotides and derivatives	20535-83-5	2	70424	52356	61920	47866	78704	99448	53290	53280	54659	55169	47775	63424	55098	87014	69594	118110	184590	126980	127930	91988	104070	70318	82490	88923	64376	109270	70165	68333	107500	82043	87943	111340	83350	61138	53918	69226	66098	65044	55464
pme3968	166.07	149.05	165.065	C6H7N5O	[M+H]+	7-Methylguanine	Nucleotides and derivatives	Nucleotides and derivatives	578-76-7	3	178860	183400	166620	151850	195200	166510	192680	181710	197580	158350	172140	187670	292900	294490	279170	359050	376130	373900	334590	341980	349430	297400	330260	316130	218050	271380	239510	288430	244140	259550	263830	310040	246150	204720	235950	237730	211180	252610	230390
pmc0274	167.1	121.1	166.031	C6H6N4S	[M+H]+	6-Methylmercaptopurine	Nucleotides and derivatives	Nucleotides and derivatives	50-66-8	3	7483700	7585800	7398400	8300100	7983400	7738800	8314800	7680100	8348500	5641500	6017700	6572200	7586400	8961100	7800100	9844500	9708400	9200700	8840000	9323900	8853300	8032500	8183200	7035400	5162200	4255200	5591200	7288800	6853700	7116500	6388800	6393500	6565800	6415600	5808400	5994400	7417800	6666000	6676200
pme2801	167.06	150	166.049	C6H6N4O2	[M+H]+	7-Methylxanthine	Nucleotides and derivatives	Nucleotides and derivatives	552-62-5	1	2102700	2525200	1799500	1953600	2104400	1885900	1598500	1448300	1871700	2453000	2075700	2048500	1293600	1671600	1471500	1646600	1626300	1640000	1833500	1751700	1978900	2271400	2000700	2216900	2619300	2612900	2465900	2296600	2204000	1788300	2330500	1776300	2325500	2284900	1983600	2069700	1948500	1934000	1735500
pme1266	167.06	124	166.049	C6H6N4O2	[M+H]+	3-Methylxanthine	Nucleotides and derivatives	Nucleotides and derivatives	1076-22-8	3	9802100	9783200	7914900	7498300	8872200	8531500	6710800	5816100	7434800	9593900	8589000	9185700	5402300	6554600	6419500	7224800	6722900	6985500	7830800	7756900	8854300	10277000	8622200	8623400	11820000	12376000	11224000	9178700	10038000	7620500	10786000	7353100	10276000	10242000	8196500	8849800	8534200	7762300	7162700
mws0663	181.07	124	180.065	C7H8N4O2	[M+H]+	1,7-Dimethylxanthine	Nucleotides and derivatives	Nucleotides and derivatives	611-59-6	3	68953	88932	70686	64300	110060	89600	89297	71886	83782	90484	81918	104870	44178	67985	100540	75107	56045	77461	66066	70481	83462	86936	78676	93950	86509	98896	88636	70101	61062	85628	88473	57144	72517	88671	81354	76168	112340	71946	63448
pmb2507	213.1	97	214.024	C5H11O7P	[M-H]-	2-Deoxyribose-1-phosphate	Nucleotides and derivatives	Nucleotides and derivatives	17210-42-3	3	25243	18326	33988	54980	52157	41567	53659	37002	26064	32451	15304	66509	29288	61432	49946	56631	46138	37314	64627	62584	45742	46028	34606	35014	24500	58480	38854	53404	40296	22211	54154	30920	29128	49284	19526	36142	74620	45506	56501
pme1194	228.1	112	227.091	C9H13N3O4	[M+H]+	2'-Deoxycytidine	Nucleotides and derivatives	Nucleotides and derivatives	951-77-9	3	192440	185120	165340	171530	199910	175970	167520	179640	161130	200860	214260	229910	204610	219360	198680	171040	156040	180920	202270	242290	206430	217930	188880	207860	187400	226370	210720	156240	197960	180150	165320	151300	145230	205010	189740	222920	160900	165400	166860
MWS2910	242.11	126.07	241.106	C10H15N3O4	[M+H]+	5-Methyl-2'-Deoxycytidine	Nucleotides and derivatives	Nucleotides and derivatives	838-07-3	3	55718	62448	53103	25998	44725	54468	53769	54576	45723	58254	44882	64692	95662	87980	103740	117990	70780	94428	88627	97036	74653	92829	82780	76765	66571	102200	95560	89276	78427	68325	98838	84617	73618	49748	70260	56843	46129	72536	60474
pme0264	243.1	127	242.09	C10H14N2O5	[M+H]+	Thymidine	Nucleotides and derivatives	Nucleotides and derivatives	50-89-5	3	436040	622610	420800	442880	407660	322550	297300	330780	312480	607610	564570	461540	460280	425400	435920	528260	664020	556580	522370	456480	513620	630190	376790	495900	468800	630240	413920	554980	579950	440700	613210	636770	508230	718470	699200	677190	431910	462520	438660
pme3732	244.09	112	243.086	C9H13N3O5	[M+H]+	Cytidine	Nucleotides and derivatives	Nucleotides and derivatives	65-46-3	3	243710	138740	83054	140000	150570	113780	149150	153850	111440	170810	165120	188230	218820	221900	161710	191030	213160	157460	201550	209230	188130	138820	86768	92616	286830	244950	251040	298750	197200	243930	334600	234260	296620	253630	269960	277800	198880	193940	169910
ML10180524	244.09	112.05	243.086	C9H13N3O5	[M+H]+	Cytarabine	Nucleotides and derivatives	Nucleotides and derivatives	147-94-4	3	401300	314480	282080	394430	407760	384630	446350	383060	326580	404400	432580	508330	501210	440860	398060	447220	622740	519200	384200	498530	390110	356700	351170	288770	621800	573790	632170	744440	501660	592220	639450	513130	658640	586530	521230	555050	310750	404800	374360
mws0976	243.06	153	244.07	C9H12N2O6	[M-H]-	β-Pseudouridine	Nucleotides and derivatives	Nucleotides and derivatives	1445-07-4	3	12619	13217	11375	22799	16602	8448.5	17473	10487	17259	10576	23609	16548	20169	15481	19522	16177	22206	23659	13636	15044	14730	24420	22871	14870	8975.3	18332	15378	20870	19746	8585.2	18212	19395	20944	7449.4	8535.6	7932.7	13531	15528	18519
mws0248	243.06	110	244.07	C9H12N2O6	[M-H]-	Uridine	Nucleotides and derivatives	Nucleotides and derivatives	58-96-8	3	44532	42062	60073	95471	83324	77451	73519	63141	103390	55693	67289	75161	73384	60361	49760	82881	62262	55717	68735	59777	81147	63109	75653	41869	61599	52120	82402	94165	70718	84739	114330	61291	109480	82205	41093	68826	58647	86196	46668
pme3961	252.11	136	251.102	C10H13N5O3	[M+H]+	2'-Deoxyadenosine	Nucleotides and derivatives	Nucleotides and derivatives	958-09-8	1	419340	367600	313060	194770	234470	215150	172750	194940	145940	739690	724410	667240	313450	307780	314250	149540	187500	170440	266670	410690	309810	273820	285140	406260	406070	486560	456640	255880	314430	219760	278100	348340	274990	830970	796780	808940	284820	352940	316240
MWSmce116	252.1	136.06	251.102	C10H13N5O3	[M+H]+	5'-Deoxyadenosine	Nucleotides and derivatives	Nucleotides and derivatives	4754-39-6	2	89588	92370	109550	81006	63008	76359	75862	94336	90028	118050	246510	118170	124890	102680	119570	105710	87134	117800	108460	124670	137830	122820	118070	138200	249820	110980	250670	143140	135290	174720	116660	126350	133950	188360	253580	169410	118520	71382	96500
pme1184	268.1	152	267.097	C10H13N5O4	[M+H]+	2'-Deoxyguanosine	Nucleotides and derivatives	Nucleotides and derivatives	961-07-9	2	1922400	1641600	1436400	1250200	1210300	1224500	1123600	1167300	1138400	3795700	2881600	2801300	1488800	1856000	1390300	1826800	1686800	1691800	2019200	2420200	2152500	2009900	1658600	2529300	1643800	1916000	1750900	1732000	1676400	1457700	1770100	1580500	1607400	3603600	3024400	3573000	1750000	1760600	1652800
pme0230	268.1	136.06	267.097	C10H13N5O4	[M+H]+	Adenosine	Nucleotides and derivatives	Nucleotides and derivatives	58-61-7	1	11973000	17015000	6985900	8783100	8795100	9716100	9912600	8487700	9719000	11673000	11616000	12125000	9792700	7303100	8073900	5199100	5387100	6865400	8857400	9601900	10085000	13833000	14552000	8706000	9692300	3922600	11901000	11308000	10475000	13315000	11145000	11378000	13302000	15576000	14685000	16296000	9839700	9695500	9798600
mws1060	267.07	135	268.081	C10H12N4O5	[M-H]-	9-(Arabinosyl)hypoxanthine	Nucleotides and derivatives	Nucleotides and derivatives	7013-16-3	3	29564	34529	29197	48201	38929	44480	49754	40420	46240	32415	29453	37290	24471	19551	34172	27667	24495	28815	33269	31246	30963	39548	68419	26719	425630	180280	746820	525730	309240	528580	334060	351960	750750	437810	395760	623810	163080	133490	143220
pme1119	269.09	137	268.081	C10H12N4O5	[M+H]+	Inosine	Nucleotides and derivatives	Nucleotides and derivatives	58-63-9	3	251620	326970	304520	100450	85173	100810	83570	100820	104880	139260	113900	120760	449040	461540	492100	297640	272780	389480	290180	405920	291580	354150	358880	388680	250710	265040	303470	177620	200780	169890	190790	145750	157260	268260	310040	269750	174830	219420	231690
Hmhp001812	282.12	136.06	281.112	C11H15N5O4	[M+H]+	2'-O-Methyladenosine	Nucleotides and derivatives	Nucleotides and derivatives	2140-79-6	3	789800	467900	460020	496540	465700	453330	417410	494270	462390	534940	507350	577130	662100	696800	526860	817420	1171700	693040	767470	692470	641900	577690	439980	398290	397880	346750	380370	354920	425620	414820	541050	404320	481860	434570	396520	395530	504330	560450	449620
MWS4354	282.12	150.08	281.112	C11H15N5O4	[M+H]+	N6-methyladenosine	Nucleotides and derivatives	Nucleotides and derivatives	1867-73-8	3	24294	23445	31281	39032	24404	32069	34945	26969	39544	33138	41665	25069	24381	31922	27548	37097	42623	56086	34645	33267	29805	30643	37956	28107	39882	44958	49915	58040	42948	57475	40655	35605	38473	45782	36386	42213	29997	24081	31776
pme1178	284.1	152	283.092	C10H13N5O5	[M+H]+	Guanosine	Nucleotides and derivatives	Nucleotides and derivatives	118-00-3	1	3988800	2619200	3463100	4586100	3922800	4134500	4368300	3852300	4156300	4537400	2773500	5673000	5117000	5121600	3952900	5043400	5093500	3619700	5467400	6220700	4728200	4897300	5037500	5230900	6052800	5639900	4388100	9097500	6873200	6373400	7673000	7242300	8130300	8249500	8140500	9022500	4516800	5465200	4785800
mws0668	283.07	151	284.076	C10H12N4O6	[M-H]-	Xanthosine	Nucleotides and derivatives	Nucleotides and derivatives	146-80-5	3	324290	600890	298910	549550	460300	491560	395320	398830	455180	477940	371200	476750	479160	419610	397780	433410	487240	551540	564660	485900	527860	515190	527660	464790	1777300	1431800	1931200	1857800	1256100	1510200	1502300	1411400	2299200	1238800	1074100	1254000	660490	656580	661190
Lmqp000329	296.07	104.11	295.056	C8H14N3O7P	[M+H]+	5-Aminoimidazole ribonucleotide	Nucleotides and derivatives	Nucleotides and derivatives	25635-88-5	1	17488000	12870000	15152000	16008000	15387000	17114000	14716000	14410000	14706000	15406000	16967000	19872000	6530600	7759000	6043800	6801200	7856400	6255200	7738400	6176700	7231700	6059600	5639600	6709600	8619500	7529400	8687600	10053000	8776700	10144000	10706000	11374000	11047000	7425800	6707000	7480000	9121100	10763000	10966000
pme1474	298.1	136	297.09	C11H15N5O3S	[M+H]+	5'-Deoxy-5'-(methylthio)adenosine	Nucleotides and derivatives	Nucleotides and derivatives	2457-80-9	1	19803000	22607000	21403000	20725000	20839000	23030000	22284000	20705000	24840000	26295000	25356000	25422000	18617000	18220000	17726000	16714000	18106000	21878000	17530000	18544000	18990000	16849000	17316000	13335000	14944000	13698000	16826000	16992000	14625000	14822000	11239000	12850000	14463000	13704000	11153000	10671000	16165000	15250000	15618000
pmb0197	298.1	166.3	297.107	C11H15N5O5	[M+H]+	N7-Methylguanosine	Nucleotides and derivatives	Nucleotides and derivatives	20244-86-4	3	27425	11799	9727	14594	9892.8	3442.8	17276	14435	6666.7	17839	17775	17435	21368	28466	15966	23690	41589	19235	29283	26589	25425	13303	14208	14962	18064	16957	25762	41820	49092	27445	24824	24891	22399	31540	15781	19308	21393	20811	16651
pme3967	312.13	180	311.123	C12H17N5O5	[M+H]+	2-(Dimethylamino)guanosine	Nucleotides and derivatives	Nucleotides and derivatives	2140-67-2	1	1457400	948480	786400	1050400	1270300	1169800	1040400	1259300	933420	1035100	1113400	1473000	2782000	2589800	2075600	4206600	3415500	4535500	3340600	3929600	3623100	2871900	3921200	3422900	2093800	1985600	2345900	4113500	3729600	2896500	4714000	5824300	5264900	3466300	3379300	3348200	1997800	2436200	2377100
Lmcp002302	312.13	180.09	311.123	C12H17N5O5	[M+H]+	N6-(2-Hydroxyethyl)adenosine	Nucleotides and derivatives	Nucleotides and derivatives	4338-48-1	1	1414600	1023000	811400	1097100	1225400	1150700	1158900	1230500	986820	987670	994860	1435800	2750600	2433600	2057400	3812000	3575400	3992700	3557600	3619400	3924300	3034300	3780600	3186500	2024200	1947400	2269700	4702700	3853300	3077400	4840300	5064500	5046100	3343200	2796600	3193800	2359100	2353400	2381300
pme3188	323.03	211	324.036	C9H13N2O9P	[M-H]-	Uridine 5'-monophosphate	Nucleotides and derivatives	Nucleotides and derivatives	58-97-9	3	46453	46890	44828	71117	73922	77344	75256	54793	46304	53876	35894	65134	99732	100530	107370	124000	127760	117830	114730	86288	118750	100500	108140	82391	57506	78863	68767	77482	70413	77511	48655	64993	90308	51475	33105	61325	71492	53752	75606
pme3184	332.08	136	331.068	C10H14N5O6P	[M+H]+	2'-Deoxyadenosine-5'-monophosphate	Nucleotides and derivatives	Nucleotides and derivatives	653-63-4	3	38452	42583	64240	49838	65333	36489	70682	37464	43009	50654	42905	52415	141440	111230	92218	83142	68678	78297	65010	81709	75280	68098	85252	62318	147780	131880	134540	85895	99214	106330	79247	99400	107890	59361	74173	71656	76749	77799	74001
pmc0066	333.05	137.05	332.052	C10H13N4O7P	[M+H]+	2'-Deoxyinosine-5'-monophosphate	Nucleotides and derivatives	Nucleotides and derivatives	3393-18-8	3	3260800	5411500	5907200	4586500	5618700	4287500	4252700	4057600	3943300	2711700	2915600	3260200	1652000	1990400	1796600	2771800	3197200	2756500	3246000	4336500	4100000	2113800	2333400	2664500	1996000	2536700	1932700	2663400	2480900	2737700	2102500	1978700	2354000	2412300	2013600	1938400	3196400	3206700	3288500
pmf0289	336.17	148	335.159	C15H21N5O4	[M+H]+	Riboprine	Nucleotides and derivatives	Nucleotides and derivatives	7724-76-7	3	24863	14238	13252	28114	26894	18211	29150	27422	25176	25046	24737	14289	1952.8	11099	3955.5	7716.5	3823.8	1905.8	2535	7143.2	3224.5	5164	7082.5	11059	11602	5928.8	13077	6627.5	12319	9819	4560.8	12561	5532.2	11616	13014	16034	10648	15607	8874.5
mws0609	344.04	150	345.047	C10H12N5O7P	[M-H]-	Guanosine 3',5'-cyclic monophosphate	Nucleotides and derivatives	Nucleotides and derivatives	7665-99-8	3	22576	9799.7	18896	42095	34740	40852	34894	36281	26443	34301	25821	33036	12232	11751	15355	33216	32733	29513	24518	20264	23083	18145	12281	12986	57171	51128	36073	51083	64292	51428	42867	44686	40177	32665	30924	27659	23807	29660	25314
pmb0981	348.07	136	347.063	C10H14N5O7P	[M+H]+	Adenosine 5'-monophosphate	Nucleotides and derivatives	Nucleotides and derivatives	61-19-8	3	1455400	1480100	1363700	1333900	1262700	1679700	1275800	1310400	1239500	1472900	1174800	1644600	1664500	1045100	1267300	1019100	953990	1265500	1918200	1363700	1470100	2185100	2443300	1184700	1239200	1076900	1823500	1920000	1965600	2646900	2796500	2332100	2718900	1953700	1467500	1585500	1255400	1713600	1444300
mws0874	346.06	210.9	347.063	C10H14N5O7P	[M-H]-	3'-Adenylic Acid	Nucleotides and derivatives	Nucleotides and derivatives	84-21-9	2	24238	14554	13359	16486	17015	10279	10668	11114	14566	6545.2	12571	12768	21721	16743	24845	13158	16648	12174	19492	23723	24695	23926	32630	18468	11674	12100	16254	18036	23507	16171	17158	39196	27566	19908	17532	13173	7798.2	14678	9970
Zmjn001030	346.06	211	347.063	C10H14N5O7P	[M-H]-	Adenosine 2'-Phosphate	Nucleotides and derivatives	Nucleotides and derivatives	130-49-4	3	117250	59959	25002	42597	45984	50187	46278	42547	44642	9	9	9	26289	49721	19147	55109	45599	80653	41985	32558	46827	53306	69803	37952	37151	42140	57875	89611	73453	67907	84324	94929	104230	9	9	9	39208	49946	43001
pmb0532	349.05	137.3	348.047	C10H13N4O8P	[M+H]+	Inosine 5'-monophosphate	Nucleotides and derivatives	Nucleotides and derivatives	131-99-7	3	84540	66681	88610	68419	86522	90178	98587	94561	61516	119900	92568	85014	124330	94882	83796	104610	80346	86138	109350	117730	116860	177830	174190	70132	57756	76593	104890	237910	129420	131620	143100	173020	149160	130450	147070	117250	76545	108470	94204
pme3337	384.12	252	383.108	C14H17N5O8	[M+H]+	Succinyladenosine	Nucleotides and derivatives	Nucleotides and derivatives	4542-23-8	3	1679700	2032700	1698500	1241200	1167500	1250000	1152300	1052200	1143300	2051000	1579100	1871900	1664500	1774400	1783800	1288900	1241000	1311400	1391300	1375800	1363200	1821300	1413400	1753100	1328100	1509700	1567700	1263000	1240400	1101800	1691400	1427800	1366300	1880600	1710600	1564700	1311800	1247800	1251500
pmc0281	400.15	136.11	399.139	C15H21N5O8	[M+H]+	Ribosyladenosine	Nucleotides and derivatives	Nucleotides and derivatives	-	3	405250	370040	334360	434350	376780	387300	410590	361360	433370	1349800	1308400	1328300	547480	483860	593220	558330	515110	581290	693580	733320	847800	1016300	659540	1440200	514230	516770	500960	615010	626180	564740	641360	603700	620620	2165200	2078600	1849900	590490	706160	657350
pme3007	402.99	159	404.002	C9H14N2O12P2	[M-H]-	Uridine 5'-diphosphate	Nucleotides and derivatives	Nucleotides and derivatives	27821-45-0	3	309140	309870	382580	472570	544960	549640	432880	527900	461630	251360	296150	295340	308360	274180	272370	479710	571240	525260	663620	462670	543620	513540	579370	404770	134580	153110	149920	258050	266800	317800	243170	225290	302150	160130	175860	154950	303710	316700	336370
pme2117	426	159	427.029	C10H15N5O10P2	[M-H]-	Adenosine 5'-diphosphate	Nucleotides and derivatives	Nucleotides and derivatives	58-64-0	3	765310	412800	561720	695830	705350	769320	572070	587410	626390	617840	488590	704080	395880	473130	455730	585110	468130	572960	803060	565010	652010	608930	674390	470710	361200	331600	366420	441310	398340	433070	394930	304440	411720	410970	362380	411070	492840	527860	514720
MWS5083	455.1	96.97	456.105	C17H21N4O9P	[M-H]-	Flavin Single Nucleotide(FMN)	Nucleotides and derivatives	Nucleotides and derivatives	6184-17-4	3	138950	124490	145630	165170	165980	143860	153970	164320	153770	118530	134910	119290	132280	167840	162230	219150	226730	231700	200890	152070	203080	170480	171280	145770	159760	152230	149430	183060	179470	227070	147620	175750	173260	136900	113500	98955	151110	157240	165340
MWSmce668	505.99	158.93	506.996	C10H16N5O13P3	[M-H]-	ATP; Adenosine 5'-Triphosphate	Nucleotides and derivatives	Nucleotides and derivatives	56-65-5	3	589740	416600	462700	836090	816910	799220	686000	710260	755450	691800	571330	807440	338740	424260	435720	730290	825030	691130	887110	475290	607620	619040	481920	653720	364170	388780	364920	395140	475410	432630	337400	394320	378520	366430	309640	328410	492570	506910	603600
Zmfn000481	535.04	323.03	536.044	C14H22N2O16P2	[M-H]-	Uridine-5'-Diphosphate-D-Xylose	Nucleotides and derivatives	Nucleotides and derivatives	3616-06-6	2	911290	671420	783680	771260	673900	774890	726140	724730	754540	749770	862190	849120	605830	659630	599980	711370	743020	651040	854860	693190	776400	605980	685930	687800	620010	782160	538500	1069600	1128000	1060400	903610	1007300	938250	800730	758760	649610	688550	785840	751120
pmb2922	565.05	323.1	566.055	C15H24N2O17P2	[M-H]-	Uridine 5'-diphospho-D-glucose	Nucleotides and derivatives	Nucleotides and derivatives	133-89-1	2	5408100	3802800	4213500	3914800	3821300	4732900	4347200	4024200	4881100	4194100	4081300	4820500	3245200	3136900	3496500	3403200	2249300	2884900	3699600	3879100	3976900	3387900	3186200	3631800	4045500	3715800	4188700	4898000	4570000	4451400	4605900	4002700	4977300	3984100	3765000	3890200	3493700	2296700	4480900
mws1409	578.9	402.6	580.034	C15H22N2O18P2	[M-H]-	Uridine-5'-diphosphoglucuronic acid	Nucleotides and derivatives	Nucleotides and derivatives	-	3	101040	60682	66693	78595	76146	77580	72305	61029	73399	63503	73892	94154	58572	43500	73726	70929	68509	56487	102190	70706	133370	86593	101380	67821	67075	81274	6815	58499	75280	68691	48974	77220	41792	53520	45444	38182	59622	63170	84873
Lmqn000780	606.08	384.98	607.082	C17H27N3O17P2	[M-H]-	Uridine 5'-diphospho-N-acetylglucosamine	Nucleotides and derivatives	Nucleotides and derivatives	528-04-1	2	88617	74749	92526	95262	108790	95390	88887	102990	88591	85690	95684	90793	164960	132620	151490	168030	229570	171320	184250	143640	135190	138140	146350	135350	71920	81254	70457	79139	85399	76141	105980	81259	81620	59135	54762	79512	106210	112570	137730
pmb0530	664.12	136.2	663.109	C21H27N7O14P2	[M+H]+	Nicotinic acid adenine dinucleotide	Nucleotides and derivatives	Nucleotides and derivatives	53-84-9	2	1355900	1408000	1140400	1598200	1457800	1251000	1459900	1470800	1120200	1238100	1301600	1633900	1170900	1138200	1066200	1284700	1398700	1167100	1595400	944690	1031200	1107500	1340400	699000	931320	925900	904390	1065800	917580	1008100	803130	1303100	720610	708650	838090	673540	826480	1118800	966190
pme2651	742.1	620.1	743.075	C21H28N7O17P3	[M-H]-	NADP (Nicotinamide adenine dinucleotide phosphate)	Nucleotides and derivatives	Nucleotides and derivatives	53-59-8	3	1480100	1096700	1279000	1562700	1682800	1568000	1476000	1602500	1477100	1395100	1307900	1647900	1263500	1500800	1361400	1389200	2391900	1971200	2122600	1035300	1498300	1722900	1829800	1558600	1301800	1311700	1356000	1487200	1529300	1564900	1417600	1347700	1463700	1162900	1091300	1183100	1379400	1705700	1952800
pme2746	784.15	437	785.157	C27H33N9O15P2	[M-H]-	Riboflavin 5'-Adenosine Diphosphate	Nucleotides and derivatives	Nucleotides and derivatives	146-14-5	3	323460	375720	528070	540170	488120	585680	643170	600370	666890	356290	484320	445410	433390	337620	489600	651640	511660	621410	785440	474760	629060	469560	523740	368120	450270	418870	434800	451500	579610	506000	495550	543170	414610	368810	250710	358070	518340	533450	432320
pmb0302	126.1	96	125.024	C2H8NO3P	[M+H]+	2-Aminoethylphosphonate	Lipids	Glycerol ester	2041-14-7	3	142630	112150	87040	54812	75620	76246	94996	98251	41056	80096	95978	75128	72886	53744	53102	43231	68920	54555	71410	65916	57907	57306	55622	43208	104780	76294	82920	87951	68404	62221	51900	64643	59726	74358	77590	85523	68653	53522	52725
Hmbp003234	255.09	163.03	254.079	C12H14O6	[M+H]+	1-O-Caffeoylglycerol	Lipids	Glycerol ester	-	3	15142	18513	19744	19965	28412	35700	19519	33875	45222	49931	26893	43004	22986	16122	32572	15396	21767	15401	20303	11376	8356.8	27269	25452	19791	20211	28084	28712	17041	24509	14789	13097	22868	30336	50862	26973	34266	22214	24257	23418
pmp001284	331.28	313.27	330.277	C19H38O4	[M+H]+	Monopalmitin	Lipids	Glycerol ester	542-44-9	1	165080	291130	334240	303690	319920	218410	316800	243520	273560	273480	282020	183760	193410	213500	193240	170290	188570	207650	186920	188750	192190	187820	181590	219880	202010	231620	201010	135810	169650	184270	184930	192690	194580	194190	216290	163800	126810	149920	133310
Lmhp011562	353.27	261.22	352.261	C21H36O4	[M+H]+	1-α-Linolenoyl-glycerol	Lipids	Glycerol ester	-	1	2386100	2494500	2958900	4889500	5044500	3756000	4308700	3999700	4196300	3708200	4050000	3768200	1672300	1447100	1445900	2291500	3064500	2715400	2449600	2198100	2192600	2106200	2001800	1897800	1704300	1463200	2197900	2782500	3198600	2770900	2254200	1917900	2489400	1892100	1543300	1775200	2848100	2598700	2287300
Lmhp011388	353.27	261.22	352.261	C21H36O4	[M+H]+	2-α-Linolenoyl-glycerol	Lipids	Glycerol ester	55268-58-1	1	1415600	1477100	1577900	1767300	1880300	1234400	1572900	1714800	1563100	1810900	1839600	1600600	501430	491840	491280	538310	716490	624710	481240	551000	521190	479820	573720	548150	758020	694140	867930	927720	1375800	1189900	1014300	877340	905800	899230	867970	851440	1030200	1067700	909030
Lmhp112042	355.28	263.24	354.277	C21H38O4	[M+H]+	1-Linoleoylglycerol*	Lipids	Glycerol ester	2277-28-3	1	409520	510750	592390	884430	854000	635120	729640	741300	741750	618120	577260	564580	312440	292910	278760	460790	561200	467840	423570	399240	405440	321590	353550	330690	326080	288030	351450	499720	627560	532610	436010	392640	511350	376720	343880	370840	577030	481790	432520
Lmhp012042	355.28	263.24	354.277	C21H38O4	[M+H]+	2-Linoleoylglycerol*	Lipids	Glycerol ester	3443-82-1	1	342840	375620	394920	389780	430520	279510	379960	389110	393720	385770	362150	302060	120960	118150	119200	141250	187200	170210	119020	134750	131880	116760	123690	127130	181550	169330	195660	276410	352300	334160	282830	260040	249550	225280	217780	215770	254220	264540	218480
pmb0296	357.3	265.4	356.293	C21H40O4	[M+H]+	1-Oleoyl-Sn-Glycerol	Lipids	Glycerol ester	129784-87-8	2	266040	341870	364040	169500	226050	189550	190640	179890	203300	185380	206880	215600	442480	326540	362610	251460	204860	288420	216030	294750	308570	342270	337440	281260	200760	224750	173380	139140	153100	148880	129080	133740	127760	156440	150170	128890	185600	236190	229660
Cmbn007148	429.12	429.12	430.126	C22H22O9	[M-H]-	1-O-Feruloyl-3-O-caffeoylglycerol	Lipids	Glycerol ester	-	3	10871	9	9	52157	55088	55685	37551	28022	44182	9	9	9	39215	38948	59867	149000	89781	174580	89994	130800	141200	60500	80348	53074	89557	37680	24781	147780	171640	101540	124320	127680	82320	72784	78398	78685	54047	63887	65958
Hmyn007081	481.25	245.04	482.262	C22H43O9P	[M-H]-	LysoPG 16:1	Lipids	Glycerol ester	-	3	61853	41579	46881	48396	43491	44560	46772	36259	34664	20462	35447	51568	90051	56686	39647	59669	78459	80720	74382	66117	64921	47186	51224	56567	76110	92657	99710	75640	82055	85070	82999	88023	85237	55366	54565	52441	80305	69080	68268
Hmyn007168	483.27	255.23	484.278	C22H45O9P	[M-H]-	LysoPG 16:0	Lipids	Glycerol ester	-	3	4963500	5251100	4903900	4139100	3561900	3349900	4020700	2799000	4114900	2657200	3458500	3733400	3058600	2182100	1711200	1751400	1906800	2251900	2442400	2079600	2270600	2960600	3599800	3327000	1316200	1068800	1586900	1367100	1669700	1778900	1323900	1066200	1375500	963340	1055400	1112900	2653600	2577100	2476000
Lmhp009526	515.32	261.22	514.314	C27H46O9	[M+H]+	2-α-Linolenoyl-glycerol-1-O-glucoside*	Lipids	Glycerol ester	-	1	26644	22707	43919	66500	78049	47786	42234	52694	49997	21247	40255	40561	31386	31544	22473	44868	50901	59297	40590	59073	38273	44109	43301	34242	70388	39168	48875	39641	29774	35617	18922	25838	30516	35533	24381	30400	57185	48602	36501
Lmhp009773	515.32	261.22	514.314	C27H46O9	[M+H]+	1-α-Linolenoyl-glycerol-3-O-glucoside*	Lipids	Glycerol ester	-	1	26090	23204	28246	60898	75176	50221	53970	43321	33182	27301	38721	43963	29544	26646	28800	41969	50669	43204	42200	49619	35581	46942	39971	29184	49963	43869	38608	25508	31667	32808	24484	20016	36705	23618	34606	37494	67724	34809	47553
Lmxp010913	676.45	184.08	675.448	C35H66NO9P	[M+H]+	1-(9Z-Octadecenoyl)-2-(9-oxo-nonanoyl)-sn-glycero-3-phosphocholine	Lipids	Glycerol ester	-	1	173130	99003	173990	106570	59691	117200	70384	93031	155380	185820	130060	151110	62205	73106	86141	69416	96923	57806	70038	30598	43729	70248	43047	73268	191140	193600	237930	99700	84151	57057	103230	114970	92149	112810	91444	84618	79891	110120	103520
Lmhp008744	677.37	261.22	676.367	C33H56O14	[M+H]+	1-α-Linolenoyl-glycerol-2,3-di-O-glucoside*	Lipids	Glycerol ester	-	1	12702	11246	20667	13492	30498	12994	18961	20439	11973	8366.7	14483	14867	14522	11456	11788	19398	13655	20330	16967	19767	11698	21169	20930	14303	12299	8840.2	10820	6840.3	7817.1	12304	6615	5492.6	9728.8	4196	4872.2	6089.5	23721	14016	10220
Lmhp008513	677.37	261.22	676.367	C33H56O14	[M+H]+	2-α-Linolenoyl-glycerol-1,3-di-O-glucoside*	Lipids	Glycerol ester	-	1	15529	16224	21056	13068	26563	9429.8	18745	11127	15171	11696	22276	19209	21777	14566	16871	11100	14806	15042	11838	15229	12281	13762	24516	10601	18455	19309	14754	13539	9823.5	12238	12545	11450	12853	11056	17731	19385	13605	20124	13893
HJAP104	107.05	77.04	106.041	C7H6O	[M+H]+	Benzaldehyde	Phenolic acids	Phenolic acids	100-52-7	2	667580	1056100	1596400	1649400	2967500	2245000	1467600	1228400	2129600	1993400	3394900	3292300	426550	775460	653600	633710	638260	558140	587760	916220	832230	901300	979980	656570	842740	789410	1306500	758750	806620	409110	581680	297010	337000	1268500	1111900	1311800	604040	1353300	1071800
pmb0069	122	105	121.053	C7H7NO	[M+H]+	Benzamide	Phenolic acids	Phenolic acids	55-21-0	3	163660	166710	150640	152720	177720	156160	140690	98412	134720	226340	217210	183710	256700	357090	332090	221730	196590	224680	284540	300930	268760	281470	265410	264340	182540	340580	280320	176020	195430	154190	198880	175310	189390	272150	282300	292710	213140	199190	212590
mws0628	121.03	92	122.037	C7H6O2	[M-H]-	4-Hydroxybenzaldehyde	Phenolic acids	Phenolic acids	123-08-0	3	246040	215050	253050	349380	281580	258860	275730	257030	299430	335270	426600	339360	505870	353090	372580	292480	325020	370070	364620	392710	321230	336160	322010	285040	402090	432810	426640	412230	498380	440120	439530	433680	392010	628040	599760	606130	367040	340820	349650
Lmbn001930	121.03	77.04	122.037	C7H6O2	[M-H]-	2-Hydroxybenzaldehyde (Salicylaldehyde)	Phenolic acids	Phenolic acids	90-02-8	3	46725	23444	22578	51704	54760	60974	46386	64475	54112	35084	26042	52635	30329	34594	50878	60994	63753	56115	51442	49140	55256	46896	55806	44184	26978	16746	37308	33230	31382	23462	31386	29062	33486	20174	27956	18687	52943	29670	37659
ML10179289	105.07	77.04	122.073	C8H10O	[M-H2O+H]+	2-Phenylethanol	Phenolic acids	Phenolic acids	60-12-8	3	201310	165810	155130	158230	150800	125720	166790	113250	164700	270240	209510	155090	301690	334610	356110	326960	206930	202710	276880	335520	351620	312700	150830	290330	139710	373990	328810	176640	174820	198800	177130	107790	200960	272180	208530	283460	173440	256910	208320
mws0025	125.02	79.02	126.032	C6H6O3	[M-H]-	Pyrogallol	Phenolic acids	Phenolic acids	87-66-1	2	72905	40152	138310	105620	107270	56317	86150	80375	77884	118830	101150	118020	35961	33896	22945	25994	28161	27812	29208	15978	26160	27037	32300	21891	146940	260030	130450	126490	196410	68741	23767	94724	44495	49671	41029	56952	73532	74776	70925
MWS1848	135.05	92.03	136.052	C8H8O2	[M-H]-	Phenyl acetate	Phenolic acids	Phenolic acids	122-79-2	3	34254	24047	74603	104000	117770	68793	98153	97847	92008	51197	53536	44235	82583	87609	38150	81466	63495	107490	56276	41815	53243	129950	94636	31876	85858	226570	106770	230580	267400	148100	65327	202810	112480	82552	46059	71328	88789	82017	76192
MWSmce466	135.05	92.03	136.052	C8H8O2	[M-H]-	4'-Hydroxyacetophenone	Phenolic acids	Phenolic acids	99-93-4	3	46106	28025	105420	176060	172390	126340	124740	167070	131870	79308	54070	63562	128740	86083	85520	122230	120340	190890	112130	59538	98825	201740	140490	72502	171180	364920	169160	364210	485450	264490	127160	345030	212290	113710	82860	121330	116950	115250	142220
mws1336	138.06	120	137.048	C7H7NO2	[M+H]+	4-Aminobenzoic acid	Phenolic acids	Phenolic acids	150-13-0	2	1688900	1706100	1500600	1302600	1519200	1389300	1378800	1360700	1262300	1201700	881140	983780	1127400	1015300	1195200	969080	853670	831040	696600	696360	832750	854900	909970	904600	2069200	2359700	1855000	1640400	1450400	1663600	1652900	1852900	1594000	1123800	1175200	1345600	1331700	1264700	1150100
mws1078	138.06	92.1	137.048	C7H7NO2	[M+H]+	Anthranilic Acid	Phenolic acids	Phenolic acids	118-92-3	3	143740	162060	131670	126000	150300	125520	108600	119330	91246	77069	94931	105010	112620	110000	125780	69831	104420	68134	98684	80611	96817	125600	120490	79314	176400	155830	209970	204200	178720	200650	153250	174660	179850	134840	167680	143750	136240	110200	103880
mws0749	137.02	93	138.032	C7H6O3	[M-H]-	4-Hydroxybenzoic acid	Phenolic acids	Phenolic acids	99-96-7	3	93298	46254	76469	123420	103050	98262	99121	108360	138980	92641	95219	103480	103040	116430	140250	158010	163070	114900	139000	156580	111590	155010	155600	80357	198580	265370	171180	295240	244960	325430	287010	253990	222450	166000	268780	202860	202360	154130	173820
Lmgn001670	137.03	108.02	138.032	C7H6O3	[M-H]-	Salicylic acid	Phenolic acids	Phenolic acids	69-72-7	3	35572	16278	28604	69074	72204	66566	76204	64591	69079	58780	58226	50069	31488	50370	42365	48704	54104	45253	51063	42176	60133	44562	53499	39634	52892	66286	43926	61262	88877	61836	60170	60756	52788	44435	58382	53052	56474	68115	76128
Hmgn001653	137.02	93.04	138.032	C7H6O3	[M-H]-	Protocatechualdehyde	Phenolic acids	Phenolic acids	139-85-5	3	28174	46765	42563	59818	64425	62430	64704	73886	72775	57816	37066	67863	83582	81720	64312	86986	82492	94007	62065	90076	69054	72406	97344	90006	111780	103320	71143	151480	170870	156550	137740	172710	157080	112360	114370	149580	119710	111030	89430
Lmbn001981	137.02	93.03	138.032	C7H6O3	[M-H]-	2,5-Dihydroxybenzaldehyde	Phenolic acids	Phenolic acids	1194-98-5	3	64596	40388	61041	112980	83136	108150	79933	109430	94031	45984	63694	69836	111680	106200	97662	89368	121910	109070	127810	120830	82826	92376	104960	117040	141590	199890	123290	153550	185580	242020	189730	161350	234680	147870	158720	185150	135190	123410	161370
pme2828	140	99	139.027	C6H5NO3	[M+H]+	4-Nitrophenol	Phenolic acids	Phenolic acids	100-02-7	3	20774000	14090000	21312000	17402000	19362000	21087000	20418000	22279000	19413000	22776000	24526000	22589000	19945000	18242000	18870000	19490000	19100000	26098000	23193000	21436000	19591000	21230000	23397000	19978000	22766000	23663000	19827000	22273000	21848000	19585000	23721000	23701000	19158000	21602000	12512000	23153000	17910000	18352000	26294000
MWS2066	143.05	115.06	144.058	C10H8O	[M-H]-	1-Naphthol	Phenolic acids	Phenolic acids	90-15-3	3	3663.2	4677.8	5541.4	6481.2	7050.9	4705.5	4165.5	5099.1	5902.9	9490.5	5511.1	8174.8	5874.1	6811	4358.5	6365.6	4262.7	6886.1	5926.7	7512.6	6848.4	7615.9	5042.3	5808.9	4715.2	5261.6	4825.4	4666.5	4701.9	6715.9	4343.8	5328.1	4269.4	3575.5	4779	4181.5	6740.1	4709	5740.1
pmp001285	149.02	65.04	148.016	C8H4O3	[M+H]+	Phthalic anhydride	Phenolic acids	Phenolic acids	85-44-9	1	490190	473590	458320	536430	568230	504590	547710	512440	518350	523360	507480	471280	515510	509000	498640	554180	499730	521890	549370	504970	586410	502200	537680	513090	556870	538790	621820	641930	545440	601320	644590	620500	608660	642100	543310	586450	456850	443950	436380
mws2213	147.05	77.01	148.052	C9H8O2	[M-H]-	Cinnamic acid	Phenolic acids	Phenolic acids	140-10-3	3	18578	13454	12345	12215	18741	12271	15834	8986.8	12496	16237	16343	15971	10723	12424	15711	12100	11591	8448.3	14796	14855	18549	15080	16576	17848	67242	67435	116180	88100	53940	83466	96151	75863	127900	80268	61169	75972	27116	29236	26453
mws0921	149.06	131	150.068	C9H10O2	[M-H]-	p-Coumaryl alcohol	Phenolic acids	Phenolic acids	3690-05-9	3	8753	19680	7158	25164	14779	33760	30164	11887	20542	1277	5080.5	6457.5	10125	7678.5	7528.5	4096.5	1880.5	3090.2	4961.5	8691.5	3130.8	7556.2	13273	8069.2	30825	56151	40704	33882	44535	42677	31236	35093	39793	36606	31274	53022	16651	24220	16232
mws0458	151.04	136	152.047	C8H8O3	[M-H]-	Vanillin	Phenolic acids	Phenolic acids	121-33-5	3	97870	103690	97579	172380	125630	139220	141790	163810	153000	127000	131200	125840	131890	119510	116430	169630	163940	175880	165380	159480	147340	102940	108030	95205	233490	240310	242480	277090	398450	458290	317680	337360	321800	224740	294690	280390	167950	191530	164990
MWSmce040	153.05	65.04	152.047	C8H8O3	[M+H]+	Isovanillin	Phenolic acids	Phenolic acids	621-59-0	3	74192	86948	94200	113150	78872	70116	96768	46838	79304	91185	66195	71464	74996	93610	81101	74108	76960	83638	62542	76069	81853	54411	57786	59091	114440	93742	104850	157310	151510	179170	154950	157270	141370	110790	127350	115890	76429	109120	96722
MWS3149	151.04	107.05	152.047	C8H8O3	[M-H]-	3-Methoxybenzoic acid	Phenolic acids	Phenolic acids	586-38-9	3	173300	160670	143710	79132	81110	76533	87228	93551	92011	138960	157400	142190	155030	176730	192620	129460	133660	122080	136780	139080	167980	246540	198600	310380	174570	178350	220590	108920	114040	117500	125900	146850	141470	312270	284980	293650	168550	165750	181580
mws0182	151.04	106.9	152.047	C8H8O3	[M-H]-	p-Hydroxyphenyl acetic acid	Phenolic acids	Phenolic acids	156-38-7	3	6088	4354.5	12635	5024.9	9043.2	1758.2	7881	10925	6685.5	10534	9821.5	8470.9	43587	42273	41196	13938	22454	10862	18098	7860	11577	20735	14294	25613	8947.1	13980	9753.5	5490	5965.3	4280.5	5329	10352	15155	6399.6	5446	6654	14754	19930	18104
MWS1846	151.04	93.03	152.047	C8H8O3	[M-H]-	Phenoxyacetic acid	Phenolic acids	Phenolic acids	122-59-8	3	9283.8	10764	6443.8	20036	16487	12110	12908	20148	27152	19367	20112	22298	5013.8	7815.8	4630.5	13363	9955.5	10626	9866.8	6311.2	9846.2	6281.8	7114.8	11924	23840	8461.5	19126	14176	14893	12484	16325	13435	11284	7050	12588	4926.2	18561	14352	13516
mws0444	152.04	108	153.043	C7H7NO3	[M-H]-	3-Aminosalicylic acid	Phenolic acids	Phenolic acids	570-23-0	3	11058	21535	20355	6831.6	11199	17392	17079	21393	16197	18747	24393	16564	8138.8	4147.8	8564	8159.5	16347	7977	12031	14526	9788.8	10856	18631	11448	16501	8269.7	5294.5	17217	7683.9	12448	14206	9823.7	12204	8218.3	9518.9	9792.8	16229	15831	14951
mws0183	153.02	109.03	154.027	C7H6O4	[M-H]-	3,4-Dihydroxybenzoic acid (Protocatechuic acid)*	Phenolic acids	Phenolic acids	99-50-3	3	206000	248980	286820	375540	393610	311010	330510	300870	294710	234950	200720	275670	286180	415400	319260	325820	318580	356000	362430	259510	431820	325850	265990	331150	302790	489670	337900	484110	501880	410360	407860	532980	424950	339550	326470	296780	335080	409270	288930
mws0180	153.02	109.03	154.027	C7H6O4	[M-H]-	2,5-Dihydroxybenzoic acid; Gentisic Acid*	Phenolic acids	Phenolic acids	490-79-9	3	185950	166900	221140	264440	208670	208380	219760	217330	231270	194880	180490	196890	225900	259930	231680	200610	180920	316260	261530	194750	217400	260360	268360	206650	198310	276470	213650	331840	349670	258450	327000	402000	310950	218660	249620	203090	246130	197500	217720
mws0639	153.02	109.03	154.027	C7H6O4	[M-H]-	2,3-Dihydroxybenzoic Acid*	Phenolic acids	Phenolic acids	303-38-8	3	265180	405020	279370	416760	487310	289720	283230	335040	368670	255970	272940	372980	373360	409130	325180	452430	482650	574060	471040	486460	329690	393830	401420	339810	459990	656460	483980	475960	587780	498990	627750	528580	434560	401010	541260	372470	381780	477560	517870
MWSmce264	153.06	123.05	154.063	C8H10O3	[M-H]-	Hydroxytyrosol	Phenolic acids	Phenolic acids	10597-60-1	3	17670	16361	10437	22742	23517	18369	21805	28313	21455	15305	14296	26573	13487	22692	24058	20326	16892	20929	22608	24696	24138	31262	32904	29709	21342	33939	29136	34344	37524	31238	20431	30355	17380	23716	18380	18650	23857	24953	26181
Lmqp008175	163.08	103.05	162.068	C10H10O2	[M+H]+	Methyl Cinnamate	Phenolic acids	Phenolic acids	103-26-4	3	41990	57523	49516	27750	34581	30679	23758	30664	34789	46957	45765	47663	30025	40505	30295	27240	30761	31725	25601	38584	35818	37024	36363	39613	31747	25050	51911	39820	31711	26916	29202	22989	31301	36281	37533	35682	32774	36984	33158
pmf0440	163.08	91.1	162.068	C10H10O2	[M+H]+	4-MethoxycinnaMaldehyde	Phenolic acids	Phenolic acids	1963-36-6	3	66762	68063	85705	75094	66378	65188	85047	63426	74746	62345	57655	70648	60973	67330	80617	65424	63629	71379	81570	68578	66071	84770	68715	73701	84735	68926	70401	97935	62494	85136	78553	72033	67659	63520	60940	64882	41005	23246	31384
pmb0142	165.1	95.2	164.047	C9H8O3	[M+H]+	Caffeic aldehyde	Phenolic acids	Phenolic acids	141632-15-7	3	62802	82254	74423	65195	68028	61942	71522	79905	74498	54511	66522	47652	69862	60769	63042	59944	48818	55796	50350	46858	59067	54674	68172	54017	140570	198600	167920	165150	112170	118250	110460	131720	152260	149570	133940	141620	78857	94826	85679
pme1439	165.05	119	164.047	C9H8O3	[M+H]+	p-Coumaric acid	Phenolic acids	Phenolic acids	501-98-4	3	41722	15068	45667	82402	89282	51396	72928	71598	61014	35641	30548	40687	30504	50628	66786	46002	62430	57103	60400	52858	21687	36579	72641	56152	25622	49551	36106	55361	33716	66256	43351	64772	57862	62805	29186	18840	33642	27256	57341
Lmbn002739	163.04	119.05	164.047	C9H8O3	[M-H]-	3-Hydroxycinnamic Acid*	Phenolic acids	Phenolic acids	14755-02-3	2	673480	494730	413570	696660	602890	428840	689440	736850	361390	339120	226360	166780	556000	560710	708710	944980	557690	678720	460080	368390	555800	428210	325090	404800	546540	481760	563720	712620	384770	734730	452420	612980	485590	403140	350440	426900	718150	500360	423190
Lmbn002648	163.04	119.05	164.047	C9H8O3	[M-H]-	α-Hydroxycinnamic Acid*	Phenolic acids	Phenolic acids	5801-57-0	2	333400	765670	1269100	651720	669920	676910	659970	634070	644280	22264	46337	27642	485870	504020	677050	447460	676750	493600	475480	390100	353710	382160	438800	233770	1010400	690400	448560	447290	406200	398090	357250	357890	422090	9	9	9	506430	440380	352770
Lmmn001643	163.04	119.05	164.047	C9H8O3	[M-H]-	2-Hydroxycinnamic acid*	Phenolic acids	Phenolic acids	583-17-5	2	250230	201850	237590	455810	553100	460070	489270	392910	394820	298820	302890	291280	219620	225010	205230	483620	842860	446140	490340	400320	394910	332900	353120	291890	456000	439470	462240	644990	642260	683370	514870	606150	526520	475810	337270	563270	376030	351680	342010
pme3083	164.04	120	165.043	C8H7NO3	[M-H]-	2-(Formylamino)benzoic acid	Phenolic acids	Phenolic acids	3342-77-6	3	20006	37638	36990	66256	49218	75802	36203	57116	46769	35925	37464	25682	22982	44802	29518	48338	51955	35397	45447	36298	42842	30362	51857	24797	50482	47196	50374	66536	86441	76345	69320	57029	73056	53667	40134	50102	61286	41212	52140
Lmbn005172	165.06	119.05	166.063	C9H10O3	[M-H]-	2,6-Dimethoxybenzaldehyde	Phenolic acids	Phenolic acids	3392-97-0	3	37568	15878	10376	71607	93865	76073	89376	61626	102110	20817	17362	9671.8	16014	26662	28241	63072	76643	58742	32794	44085	44228	51142	58582	29468	6319.5	16679	10478	88585	84240	60269	67280	71959	59850	15043	15374	16871	60694	51253	27138
Lmrn003000	165.06	103.06	166.063	C9H10O3	[M-H]-	2-Hydroxy-3-phenylpropanoic acid	Phenolic acids	Phenolic acids	7326-19-4	3	32852	16651	15177	94355	87427	96468	92090	83014	85200	15840	13183	11122	32796	23922	23116	110040	106790	111870	106870	77214	96714	90472	86276	59602	14690	18856	25959	115650	119950	106510	134700	99964	95357	43280	40152	16846	80811	51966	67331
mws0467	165.06	119.05	166.063	C9H10O3	[M-H]-	3-(4-Hydroxyphenyl)-propionic acid	Phenolic acids	Phenolic acids	501-97-3	3	25865	19400	6619.5	65367	63820	80492	52470	58346	79378	12543	7613.2	11594	21638	24958	22430	58192	72059	95720	57376	46863	44938	67319	78000	40699	12643	23103	17542	72508	69418	63168	73727	74426	77470	35082	28783	24625	34304	44517	41767
Lmdp003146	167.11	93.07	166.099	C10H14O2	[M+H]+	Rhododendrol	Phenolic acids	Phenolic acids	501-96-2	2	385730	208200	203470	240140	188580	275580	275040	210350	293160	272640	226850	339290	399470	388500	391130	317000	245710	381380	300560	266810	320970	211230	253320	223840	319070	382220	501120	637990	591920	463290	753100	535080	691050	399310	382670	311130	288360	249250	320750
pmn001681	165.09	149.06	166.099	C10H14O2	[M-H]-	1-(4-Methoxyphenyl)-1-propanol	Phenolic acids	Phenolic acids	5349-60-0	3	75210	174010	161570	189230	183450	161150	173120	165750	181140	243040	239770	254010	155210	114950	81893	151840	143950	167130	166850	149540	148210	112790	117930	160120	140970	163150	109700	129530	111310	118400	100240	106270	101200	164370	165600	166000	82782	69245	59730
NK10253223	168.06	94.06	167.058	C8H9NO3	[M+H]+	2-Amino-3-methoxybenzoic acid	Phenolic acids	Phenolic acids	3177-80-8	3	62879	113460	93741	59509	52855	78905	52201	34766	62663	72918	67576	86874	173490	156450	155060	176080	170900	198440	169420	175750	154080	153860	134620	96291	144240	126200	129910	86032	73723	88124	53005	66748	74025	73877	64886	78775	68827	73111	88137
MWSmce490	167.04	123.05	168.042	C8H8O4	[M-H]-	2',4',6'-Trihydroxyacetophenone	Phenolic acids	Phenolic acids	480-66-0	3	18851	17691	27156	9746	8197.2	11696	8619.4	8882.5	12386	23026	38295	15155	29494	37446	18228	16340	22597	13880	17706	22443	17376	34287	30686	38598	31286	42534	26813	10895	7487.2	6150	13084	5295.2	16287	22216	9838	15992	21037	27208	27432
pme1292	167.1	123.04	168.042	C8H8O4	[M-H]-	Homogentisic acid	Phenolic acids	Phenolic acids	451-13-8	3	187780	170750	211320	123050	119000	117350	120500	104040	127780	190920	178630	151280	537120	499330	440240	273880	226430	265720	261950	262490	355350	395760	388370	367580	158080	191820	275800	108090	96547	59538	115130	104590	82268	107920	121070	162720	205380	171810	156940
Lmmp003042	169.05	123.04	168.042	C8H8O4	[M+H]+	Protocatechuic Acid Methyl Ester	Phenolic acids	Phenolic acids	2150-43-8	2	245800	224130	230760	201990	225270	188770	219080	211090	220870	248860	200980	195450	236210	197580	216000	241400	217330	234630	191540	234430	247180	271130	165790	215330	278800	250680	246240	251380	271110	240580	252920	243360	240490	267220	251420	266100	196700	242550	196520
pme2598	167.03	123.04	168.042	C8H8O4	[M-H]-	3,4-Dihydroxybenzeneacetic acid	Phenolic acids	Phenolic acids	102-32-9	3	175090	203370	255850	102200	103000	178030	104770	180440	113500	160250	133650	208970	574980	481210	447160	305260	239600	281950	302900	296940	274780	468300	361800	404030	161830	228780	265190	83450	77590	86446	99052	85224	100290	124140	172160	185100	198880	211030	245790
MWSslk138	169.01	151	170.022	C7H6O5	[M-H]-	2,3,4-Trihydroxybenzoic acid	Phenolic acids	Phenolic acids	610-02-6	3	73669	63346	64887	65337	75715	70524	80578	109950	84352	87235	97584	81183	110380	126830	162610	117050	112830	124070	101930	111810	133570	113690	137480	134520	162160	183920	112150	129680	136620	132410	159770	162030	126180	137320	181710	173370	130710	136590	112080
mws0024	169.01	125	170.022	C7H6O5	[M-H]-	Gallic acid	Phenolic acids	Phenolic acids	149-91-7	1	61754000	61777000	62227000	61213000	62728000	65683000	63784000	61422000	61759000	74691000	67844000	76615000	71966000	85201000	84518000	68134000	63801000	77010000	67353000	76033000	77624000	89064000	93786000	89556000	64989000	87731000	68133000	82634000	87492000	74419000	88779000	79607000	80912000	75312000	79690000	87470000	78846000	70913000	78062000
Xmbp001692	171.03	81.03	170.022	C7H6O5	[M+H]+	2,4,6-Trihydroxybenzoic acid	Phenolic acids	Phenolic acids	83-30-7	1	14029000	14978000	11347000	5863800	5981100	6494300	6473700	5331500	5991900	11658000	14149000	13492000	5356000	6078700	4917800	3111100	3168800	3522300	3522100	4301000	4492000	5679800	5241000	6064100	6426100	6615100	10043000	5772300	4941300	4258400	5047400	4870100	4982700	7597700	5866700	4031200	5942100	7087500	6155900
pmb2795	177	145	178.063	C10H10O3	[M-H]-	4-Methoxycinnamic acid	Phenolic acids	Phenolic acids	830-09-1	3	2509100	2609500	2788900	4942700	4350000	5215000	4550000	4915500	4505500	2583800	2755600	2991500	1931200	2201400	1656400	3777500	3603800	4163000	3992100	3514600	3620000	2658800	3022000	2611200	3827800	4647300	4093900	4924800	4010200	4946700	5194600	5092400	5003800	4710800	4228100	4495100	3147100	3192000	3139200
mws1195	179.07	147.1	178.063	C10H10O3	[M+H]+	p-Coumaric acid methyl ester	Phenolic acids	Phenolic acids	3943-97-3	1	3173000	4171700	3906900	6962100	6327300	6882100	6567300	7019300	6396900	3377300	3525300	3862000	2689900	3193300	2211600	4984000	4499400	5254900	5379900	4602500	5140500	3596000	4088700	3468400	5000600	5939000	5589300	5911300	5021300	6293400	6395800	6292600	5991600	6350000	5697800	6123700	5181900	4590100	4301000
mws1200	177	145	178.063	C10H10O3	[M-H]-	Trans-4-Hydroxycinnamic Acid Methyl Ester	Phenolic acids	Phenolic acids	19367-38-5	3	3370300	3491500	3746500	6714600	5799600	7082700	6500000	6699400	6111800	3735000	3923700	4096200	2582700	3147800	2195900	4913200	4590300	5243000	5119300	4568800	4768600	3401900	4022100	3317700	5512500	6281400	5342800	6290700	4915200	6412600	6164400	6658000	5997400	6222300	5590500	5820700	4394400	4437300	4536400
mws2212	179.03	135.05	180.042	C9H8O4	[M-H]-	Caffeic acid	Phenolic acids	Phenolic acids	331-39-5	3	24578	22291	18030	183040	191250	129400	164300	145800	205090	25924	31513	49230	18882	26194	33879	94497	85290	91392	93339	68135	83279	40739	79296	29437	23089	52328	22514	56940	100060	56178	92168	63328	79565	7578.5	11297	18476	58616	30679	75976
mws1198	179.07	73.1	180.079	C10H12O3	[M-H]-	Methyl 3-(4-hydroxyphenyl)propionate	Phenolic acids	Phenolic acids	5597-50-2	3	2904.9	5199.4	4575.2	3657.7	5527.1	4438.3	4827.9	5632.7	8443.6	9139.3	5552.4	5080.9	5352.2	3934.5	5739.2	7061.6	5326.7	7378.1	7297.6	7869.1	6600.9	4364.7	8786.9	7859.9	6683.5	6352.6	4630	6484.2	5922	4154.1	3568.3	6888.1	4415.8	6367	7429.2	5049.2	3943.8	6929.9	5313.6
mws0093	179.07	146	180.079	C10H12O3	[M-H]-	Coniferyl alcohol	Phenolic acids	Phenolic acids	458-35-5	3	32508	57530	44575	42219	40221	52072	41131	59657	44478	40423	29220	29828	31613	28673	25041	29362	24293	35326	21279	30668	37920	25678	31065	27032	76478	78532	42091	73121	86589	69726	68358	87840	61935	62794	44686	52733	42104	47812	35396
MWS2070	179.07	92.03	180.079	C10H12O3	[M-H]-	Propyl 4-hydroxybenzoate	Phenolic acids	Phenolic acids	94-13-3	3	1946.3	2381.5	1588.1	3265	1811.7	1816.5	2537.8	3000.1	2573	2460.8	1958.5	5395.5	5570.5	11793	12574	2826	2619.7	2492.7	3234.3	12099	17345	7137	24330	8357.8	86146	94488	79058	31186	5135.8	4872.8	6371.6	6149.6	69707	1574.2	2844.5	59798	14393	13291	12945
Lmbn004847	179.07	146.04	180.079	C10H12O3	[M-H]-	4-Methoxyphenylpropionic acid	Phenolic acids	Phenolic acids	-	3	12390	12368	14646	19276	12616	11730	9694.8	5507.5	9670.8	4174.5	6273	7711.2	9015.2	5571.5	4801	4118.8	8389.5	6204.2	9059.5	8970.8	13877	8247.8	6185.2	11398	17170	27732	14027	16487	13062	12425	22958	15860	13161	22072	11737	17292	13188	22889	11832
Hmcn006267	181.05	107.01	182.058	C9H10O4	[M-H]-	2,6-Dimethoxybenzoic acid	Phenolic acids	Phenolic acids	1466-76-8	3	3466.5	8615.5	4874.3	7739	5243.5	3472.2	8599.8	3747.2	4800.2	4686.9	4550.2	6047.4	5915	10222	8933.9	3974	10614	6443.3	6534.6	6532.9	6523.3	5818.2	7686.1	5076.1	9831.9	10747	9835.1	6622.8	4987.3	8332.3	7608.2	5788.5	7592.8	8305.2	5852.8	4925.3	4431.6	5327.9	4778
Lmrn001951	181.05	135.04	182.058	C9H10O4	[M-H]-	(S)-2-Hydroxy-3-(4-Hydroxyphenyl)Propanoic Acid	Phenolic acids	Phenolic acids	23508-35-2	3	29483	15492	20102	100650	76370	78376	97196	82042	90002	25573	16711	16326	30312	22616	31474	87098	99718	75584	65502	65837	72893	88285	85894	60842	29359	27317	28082	103710	73816	74773	100070	103640	90902	47421	44743	27230	47992	49412	55720
Hmtn001288	181.05	135.04	182.058	C9H10O4	[M-H]-	Methyl 2,4-dihydroxyphenylacetate	Phenolic acids	Phenolic acids	67828-42-6	3	8439.8	4018	13975	10219	7135	8977.4	7145.6	8866.4	9785	4994.8	2165.1	3075.2	13506	11588	9387.1	10504	15267	11235	11339	20211	10683	10523	14661	6131	7617.5	7865.9	6208.5	14249	7443.6	10263	8508.5	12039	9826	6674.5	9340.3	3563.5	4750.4	10278	8225.8
MWS3046	181.05	121.03	182.058	C9H10O4	[M-H]-	3-(3-Hydroxyphenyl)-3-hydroxypropanoic acid	Phenolic acids	Phenolic acids	3247-75-4	3	18775	18172	15406	28444	26914	28268	22729	23594	37454	12501	18068	14653	21126	13652	12657	25476	26741	19499	21357	12202	27876	13442	24600	18269	28025	24019	23226	25741	23128	23042	34863	27028	37938	37276	28569	29468	18674	21194	21722
HJN037	183.03	124.02	184.037	C8H8O5	[M-H]-	4-O-Methylgallic Acid	Phenolic acids	Phenolic acids	4319-02-2	2	5987300	7876000	7336700	5230300	5253700	4861000	5110200	4661700	5602400	4704500	6121300	5676800	3458800	4400000	3926700	1394300	1932000	1380200	1960300	1259900	1318500	2244500	1667000	1625900	3600900	4636100	3975100	1970900	1850700	2213700	2512800	1869900	2486000	1723700	1959300	1435400	3715500	4491900	2738300
MWSmce230	183.03	124.02	184.037	C8H8O5	[M-H]-	Methyl gallate	Phenolic acids	Phenolic acids	99-24-1	1	5765900	7800300	8258900	4738200	4907900	4551300	4448600	4459700	5795500	5218000	5141200	5335000	3219400	3988100	3727700	1366300	1769900	1406700	1719100	1696600	1472800	2366400	1767500	1454900	3596100	4420000	4604800	1783500	2208600	1964200	2117800	1697600	2211900	1706000	1619100	1474600	3659600	3405100	3273600
pme0309	183.03	124	184.037	C8H8O5	[M-H]-	3-O-Methylgallic Acid	Phenolic acids	Phenolic acids	3934-84-7	1	5333500	7792600	6605300	5125300	4223100	4616000	4149200	4239100	4791700	4808500	4827900	4701200	3277000	4051500	3552700	1287400	1704500	1398500	1418400	1599300	1270200	2223500	1546000	1563400	3883500	3855700	3932100	1734700	1981000	2054000	2151700	1558800	2220300	1804800	1413300	1482400	3461700	3954000	3347100
Lmcn002039	183.07	153.02	184.074	C9H12O4	[M-H]-	Antiarol; 3,4,5-Trimethoxyphenol	Phenolic acids	Phenolic acids	642-71-7	3	495780	515380	462820	335110	350420	368230	330640	322320	320490	343070	417800	342950	332790	416830	284500	160280	173770	134820	152670	140400	134450	218170	149350	185590	360340	341050	391620	189270	212180	180420	218020	153440	184180	185310	159440	153740	250890	276190	297260
MWSslk083	183.06	153.02	184.074	C9H12O4	[M-H]-	4-Hydroxy-3,5-dimethoxybenzyl alcohol	Phenolic acids	Phenolic acids	530-56-3	3	548310	616130	578970	428080	455520	426160	386660	340200	404270	385600	438570	466100	329280	394910	311410	133730	186170	133950	162310	171160	148670	207540	182320	163240	318030	367070	415890	197920	227670	197480	214720	169160	197890	193130	136270	139770	363030	319910	311250
Xmgn006542	193.05	133.03	194.057	C10H10O4	[M-H]-	Dimethyl Phthalate	Phenolic acids	Phenolic acids	131-11-3	3	220340	228650	208560	396620	416940	467800	412930	354770	428140	143610	153690	171420	269920	272030	235280	421820	402730	411360	384530	393990	342580	345130	314980	236430	346740	350600	331050	351030	306430	347580	365800	370300	328610	165440	159860	139020	269650	243520	236570
mws0014	193.05	134.01	194.058	C10H10O4	[M-H]-	Ferulic acid*	Phenolic acids	Phenolic acids	537-98-4	3	17870	14576	5900.8	19562	27778	17546	8610.8	9150.5	15991	24228	10028	14610	40456	23089	44662	23175	31429	27324	22376	38023	29217	26049	33694	25302	25320	25286	27461	24900	32720	40506	21176	32340	32860	18223	14786	17950	21372	19402	29242
pme0422	193.06	134	194.058	C10H10O4	[M-H]-	Isoferulic Acid*	Phenolic acids	Phenolic acids	537-73-5	3	14749	20940	20816	27225	22287	26464	21893	16124	20158	22367	11079	19422	46737	32218	43797	38628	27258	45559	24944	38650	47180	58451	43685	15510	28835	25298	36612	35763	52140	32148	49507	41906	48926	23919	22578	26056	26322	49065	22387
Lmdn003756	193.05	135.05	194.058	C10H10O4	[M-H]-	Methyl caffeate	Phenolic acids	Phenolic acids	3843-74-1	3	8999.2	36846	20063	8851.6	10874	16620	9842.8	11751	12080	19335	17729	18110	62377	53516	20069	22341	10937	14052	15579	18525	10968	9161.1	7409.4	16259	10989	17459	24405	12284	13581	21439	10323	7343.7	13184	24451	16953	14305	11679	13207	10157
pmb2497	197	153	198.053	C9H10O5	[M-H]-	4-Hydroxy-3-methoxymandelate	Phenolic acids	Phenolic acids	55-10-7	3	243440	132420	151260	133920	161090	114540	107540	79203	109460	425560	348130	290420	360670	447210	359550	105570	75875	125080	170060	146640	192130	262200	147250	262240	225580	181220	241880	33395	58423	50950	70812	23797	26341	139380	135310	156800	194960	154020	148720
Lmln010063	205.16	189.13	206.167	C14H22O	[M-H]-	2,6-Di-tert-butylphenol*	Phenolic acids	Phenolic acids	128-39-2	1	121830	120080	112430	128870	127300	126760	125900	134470	130190	120910	117620	129050	118370	109070	116930	127670	131600	114590	120930	124320	110300	127790	97502	108030	116180	118970	126890	141970	116030	139450	133900	108320	119820	122830	109290	125670	99227	80193	89630
Lmbn013410	205.16	189.13	206.167	C14H22O	[M-H]-	2,4-Di-Tert-Butylphenol*	Phenolic acids	Phenolic acids	96-76-4	1	93515	91090	84607	108080	97029	97180	101610	98785	104230	108720	89335	101290	84820	92921	78414	89241	101170	99208	100400	91064	100520	101480	96797	92706	90756	96462	94613	101430	94291	105930	113620	96896	90197	93158	94526	97196	77299	64314	66910
MA10107783	207.03	119.05	208.037	C10H8O5	[M-H]-	3-[(1-Carboxyvinyl)oxy]benzoic acid	Phenolic acids	Phenolic acids	16929-37-6	3	44445	21546	18224	75154	129080	92208	109380	96595	102000	15685	9796.5	24940	36288	23934	22936	131380	114710	131710	82742	59270	96087	106120	96444	51800	23904	27310	24515	103390	128990	117630	146010	136530	99608	54342	52050	38466	73006	64619	72368
mws1212	209.08	177.3	208.074	C11H12O4	[M+H]+	Ferulic acid methyl ester	Phenolic acids	Phenolic acids	2309-07-1	3	450910	495680	293150	424440	375910	399620	377920	318490	417230	304610	395370	383800	295780	364110	280520	364490	433940	407680	413220	347660	362560	313840	345110	264300	478320	392120	505360	508840	420370	542190	521970	412840	533050	314950	271980	275180	325100	359200	386970
pme3443	207.07	192	208.074	C11H12O4	[M-H]-	Sinapinaldehyde	Phenolic acids	Phenolic acids	4206-58-0	3	9027.3	10641	8473.9	10903	5916.5	12025	9518.7	8964.4	5798	5121.6	9489.5	11100	15557	13386	21922	14767	18862	17883	9959.6	11475	12385	8904.6	11659	14582	14615	19833	18209	19181	18801	20430	31587	9341	15968	21516	20775	19507	18321	13973	12131
pmb2620	207.07	133.1	208.074	C11H12O4	[M-H]-	3,4-Dimethoxycinnamic acid	Phenolic acids	Phenolic acids	14737-89-4	3	124470	133140	79958	118670	124650	123410	117580	109900	116040	92031	112390	109690	79582	97501	65620	117730	134280	129880	132080	105340	106860	100760	109230	71455	139560	114800	143280	148490	150000	161750	133910	124680	143720	74912	75851	69190	101980	104230	107730
MWSmce355	211.06	181.01	212.068	C10H12O5	[M-H]-	Methyl Syringate	Phenolic acids	Phenolic acids	884-35-5	3	5963.6	12271	2890.9	13335	19655	23784	16254	17742	19055	9	9	9	7193	10285	12030	20502	17432	22039	17600	13747	16744	10382	18058	6682.2	18919	9187.8	29407	16763	14793	14476	16532	22327	21963	9	9	9	12253	9135.5	11017
Lmyn000160	237.06	87.01	238.069	C8H14O8	[M-H]-	Mucic acid Dimethyl Ester	Phenolic acids	Phenolic acids	-	2	1548100	1594600	1507700	1578800	1381300	1651200	1501400	1464000	1569200	1790800	1957500	1734800	1683200	1844500	1673600	1598200	1665500	1673200	1548600	1592700	1766200	1766900	1675500	1801500	1883100	1782900	1995200	1799000	1662800	1891200	1858900	1908300	1688200	2047700	2001100	1904700	1517000	1653700	1651600
pmn001669	237.08	147	238.084	C12H14O5	[M-H]-	Methyl sinapate	Phenolic acids	Phenolic acids	20733-94-2	3	8385.1	10691	11098	11238	8920.4	7088.4	9137.6	6308.1	7926.8	8184.2	7237.4	15636	7484.5	9782.4	7862.5	5796.6	5625.7	5858.8	8580.4	4417.1	5211.6	5625.6	3947.8	6378	2694.3	5901.1	9841.6	3696.6	2822.2	3125.6	5904.6	4322.3	2850.6	2561.3	1452.8	1898.5	5077.5	7200.6	7444.6
MWSmce675	271.08	108.02	272.09	C12H16O7	[M-H]-	Arbutin	Phenolic acids	Phenolic acids	497-76-7	1	94575	84192	94307	157270	171760	166230	171240	198890	175650	166200	165010	158660	150760	135330	134310	249250	227450	280960	232370	204510	219110	135330	189870	137700	262120	198890	204000	333870	316030	332440	276490	352510	399240	309460	340760	326600	198040	212750	181390
MWSmce341	279.16	149.03	278.152	C16H22O4	[M+H]+	Butyl isobutyl phthalate*	Phenolic acids	Phenolic acids	17851-53-5	1	17625000	19035000	20155000	20175000	21048000	20479000	20439000	19973000	20921000	20902000	19506000	17788000	19806000	18378000	17741000	19832000	18786000	19967000	21051000	19035000	20570000	19400000	18534000	20174000	20882000	17269000	21993000	23092000	21831000	21972000	24167000	19727000	22069000	22749000	19506000	20961000	16712000	17571000	14715000
Lmlp012720	279.16	149.02	278.152	C16H22O4	[M+H]+	Dibutyl phthalate*	Phenolic acids	Phenolic acids	84-74-2	1	19531000	20389000	19775000	20209000	21204000	20190000	22550000	21135000	20602000	20839000	19769000	20004000	19656000	19739000	20426000	21176000	20562000	19320000	20714000	20038000	21478000	20291000	19991000	21128000	22021000	21449000	22706000	24786000	20407000	24155000	23752000	22367000	22216000	23440000	19564000	22321000	16757000	18088000	16902000
Lmxp011770	279.16	149.02	278.152	C16H22O4	[M+H]+	Diisobutyl phthalate*	Phenolic acids	Phenolic acids	84-69-5	1	18860000	21268000	19481000	21785000	21318000	20559000	21044000	20185000	22269000	21342000	19311000	19091000	21133000	19087000	19339000	21947000	19519000	20658000	20709000	19319000	21135000	20723000	20930000	22463000	21907000	21470000	22858000	24942000	20166000	24811000	22436000	21618000	23395000	23328000	21497000	22405000	18565000	17236000	17605000
Lmhn002926	279.05	163.04	280.058	C13H12O7	[M-H]-	p-Coumaroylmalic acid	Phenolic acids	Phenolic acids	-	3	13302	13395	18292	18340	16447	13676	24343	20792	15236	13848	15855	26819	8762	10878	27264	17515	18161	18152	11474	14722	3000	12054	15090	13838	13274	6672.2	16600	20060	20482	21880	26087	17543	150490	11451	21138	26554	15286	9148.2	18502
mws1505	283.1	135	284.105	C17H16O4	[M-H]-	Phenethyl caffeate	Phenolic acids	Phenolic acids	104594-70-9	3	146200	123250	86201	160880	159960	167940	147740	137460	182420	195800	181420	213310	1767.1	1186.4	974.54	887.75	918.71	1123.6	735.05	1179.1	707.21	1281.8	1764.6	611.2	1752.5	2593.4	1864.3	1186.9	2925.8	3872.9	2563.4	4859.2	2741.3	6538.9	1586.2	3769.6	44216	46562	47160
Lmyn001519	285.03	133.02	286.032	C11H10O9	[M-H]-	L-Malic acid-2-O-gallate	Phenolic acids	Phenolic acids	-	1	430080	648420	810170	1038400	906080	799250	700200	616010	840320	1165900	1066500	1105500	281870	352810	264000	318440	304730	322640	294590	353090	373130	512150	362590	482390	338670	300070	493970	375600	692690	461450	914140	451970	520140	588040	524670	448670	460810	534720	554660
mws1521	285.1	121.03	286.105	C13H18O7	[M-H]-	Salicin	Phenolic acids	Phenolic acids	138-52-3	2	1968000	1271800	637570	380780	410110	375350	437280	371680	433240	513140	621190	659310	1468600	1348200	1059200	505920	515940	563720	548040	503290	576640	517370	473780	466640	1348600	1024500	1395400	443080	478390	453900	398830	415390	440740	432600	380390	410930	602920	541250	584620
Hmhn000927	287.08	125.02	288.085	C12H16O8	[M-H]-	Phloroglucinol-1-O-β-D-glucopyranoside	Phenolic acids	Phenolic acids	-	3	25523	32434	29833	52582	58645	59535	69177	42100	67287	31837	27715	18747	75866	30947	50436	104380	40589	79023	44241	61469	55398	43148	65116	33732	31370	57816	34818	69620	49888	42285	97853	45605	82308	40500	24604	23468	37008	55833	47921
mws2120	291.01	247	292.022	C13H8O8	[M-H]-	Brevifolin carboxylic acid	Phenolic acids	Phenolic acids	18490-95-4	2	773350	777070	834120	696040	571500	809210	884760	798150	802340	978270	1161800	1187500	832950	1055000	724030	705200	843150	902920	927510	674250	878620	829200	582900	712100	736260	567720	705140	469980	637130	526330	670820	493550	575130	503470	485970	399540	698430	660560	712050
Lmhn001386	299.04	167.03	300.048	C12H12O9	[M-H]-	Vnilloyltartaric acid	Phenolic acids	Phenolic acids	-	2	22589	20971	15102	19480	19406	16997	18634	21485	19958	22179	15039	17312	18235	20764	21081	26748	18557	26565	20456	18114	17834	22987	30702	23819	75215	70389	82318	71702	54230	89649	101630	75110	111820	70196	71991	85097	46966	35878	41581
Zmhn001358	299.08	137.02	300.084	C13H16O8	[M-H]-	4-O-Glucosyl-4-hydroxybenzoic acid	Phenolic acids	Phenolic acids	-	1	3992300	3998200	2751300	11070000	11905000	12198000	10839000	12160000	12210000	5148200	3662800	3910400	6789400	8603700	8181900	19498000	21044000	20850000	17603000	13004000	13878000	13574000	14550000	12078000	17210000	13960000	17569000	35880000	31114000	26335000	33312000	36351000	30489000	15260000	13730000	14911000	14068000	15160000	15311000
Zmhn001926	299.08	137.02	300.084	C13H16O8	[M-H]-	1-O-Salicyl-D-glucose	Phenolic acids	Phenolic acids	60517-74-0	1	3609100	4005400	2894300	11707000	11730000	12574000	11559000	11578000	13109000	5498300	4091100	4199200	7136000	9456500	8013100	19099000	22263000	21573000	19311000	12951000	13830000	12151000	14791000	11536000	17177000	15106000	18439000	35563000	31778000	30100000	35195000	39047000	31880000	14871000	13177000	13964000	14443000	15315000	14123000
Hmtn001302	299.08	137.02	300.085	C13H16O8	[M-H]-	Glucosyloxybenzoic acid	Phenolic acids	Phenolic acids	-	1	4016800	3932400	2798900	11094000	11522000	13046000	12453000	13726000	12664000	4836800	4041900	4079200	7095400	8667600	9064300	17644000	20841000	19815000	17428000	14797000	14184000	11895000	14886000	10917000	17106000	13207000	17142000	36999000	31462000	30100000	36150000	37823000	32090000	15929000	14096000	14201000	14229000	13938000	15617000
pmb3142	299.1	137.1	300.085	C13H16O8	[M-H]-	Salicylic acid-2-O-glucoside	Phenolic acids	Phenolic acids	10366-91-3	3	287010	459150	294640	318030	255000	309200	309710	304600	256780	369980	346280	384930	347890	321560	332860	207620	229870	242030	242580	231580	212470	190340	229780	199950	500380	500480	499560	455500	391660	406020	476490	511980	530700	505350	464970	438080	341500	319790	307020
Hmsn002598	301.09	139.04	302.1	C13H18O8	[M-H]-	Salirepin	Phenolic acids	Phenolic acids	26652-12-0	2	107920	131590	92496	114650	106010	119850	91438	97358	100580	166410	144400	149340	74879	93036	80778	80108	87275	80046	107690	106690	115500	103730	94962	151670	110690	138360	120240	59847	77382	59046	93741	88027	77000	197360	175330	173480	99855	92922	107520
Hmqn000843	301.09	123.01	302.1	C13H18O8	[M-H]-	Tachioside	Phenolic acids	Phenolic acids	109194-60-7	2	5052300	6607100	5069400	6402300	6380500	6474000	6612300	6320100	5822600	9065300	8618000	9864500	4760600	4437500	4072800	4584600	5820900	5851500	5432200	5151800	5257600	5352800	4425900	5627500	5170900	4510100	6487100	5791000	6252200	6552800	5314900	5482400	5889400	8302800	7317100	8031200	5227800	5575300	4891800
Hmdn001963	305.03	273	306.038	C14H10O8	[M-H]-	Methyl Brevifolincarboxylate	Phenolic acids	Phenolic acids	154702-76-8	2	464400	369880	309270	322050	259440	470360	260310	251800	292990	447160	499270	437120	239200	250870	180730	139180	183860	192460	221570	170250	155770	252430	178910	187070	188220	165010	294010	103540	155610	117300	176750	107190	149170	43241	38247	34524	186450	213000	244750
Lmsn004674	309.1	147.05	310.105	C15H18O7	[M-H]-	1-O-Cinnamoyl-β-D-glucose	Phenolic acids	Phenolic acids	40004-96-4	2	208440	2052300	2989000	1705600	1726700	1779700	2052600	1888900	1920200	28900	88117	100530	2923100	2230600	3404800	2125800	1711800	2022400	1549500	1398500	1797100	1871200	1977300	815490	5765000	3781700	2610000	1703900	1206600	1172200	1317200	1346300	1530400	218620	104670	4329	1408000	1464500	1669200
Lmsn002887	311.08	163.04	312.085	C14H16O8	[M-H]-	1-O-Caffeoyl xylose	Phenolic acids	Phenolic acids	-	1	851700	1092000	1325000	2371900	2001100	2407800	2304600	2212200	2191400	86359	170920	140700	1492800	1458500	1924600	2006200	2066200	1824800	1320100	1011700	1291900	1193100	1278800	588860	1800400	1122600	1316100	1361400	1362900	1390700	1298600	1236900	1158400	121080	102670	20929	1196700	1176700	1175200
pmn001367	315.07	153.02	316.079	C13H16O9	[M-H]-	Protocatechuic acid-4-O-glucoside	Phenolic acids	Phenolic acids	-	1	9136800	8361800	7917200	16460000	15701000	16598000	16232000	16889000	18078000	11139000	11157000	12752000	9416800	8559400	8177300	21402000	21305000	21763000	22026000	16797000	19506000	15563000	17613000	15038000	10789000	11582000	10992000	24608000	20989000	20410000	29255000	22072000	21675000	12154000	11053000	11956000	12878000	13065000	13336000
pmb2871	315.07	153	316.079	C13H16O9	[M-H]-	1-O-Gentisoyl-D-glucoside	Phenolic acids	Phenolic acids	23445-11-6	1	5538400	5204500	5282100	8898500	8912600	8836000	9017200	9600100	9874600	6895800	6962100	7662600	5549600	4803700	4705800	11106000	12323000	11113000	11668000	9628800	10957000	8190400	9625300	8484200	6134400	6977900	6357700	12555000	10258000	11325000	14475000	11455000	11303000	6249000	6302800	6552500	7168300	7051400	7195800
pmb3075	319	145.1	320.09	C16H16O7	[M-H]-	3-O-p-Coumaroylshikimic acid	Phenolic acids	Phenolic acids	-	3	19736	22199	17609	10539	12588	16256	17898	20399	12272	9822	10559	5957	24796	40180	28593	27553	19076	41181	25812	25770	10624	34598	21768	20869	29904	36581	27090	30834	14117	21968	15806	32885	31424	21897	45835	33400	18556	15492	7106
pmn001513	321	125	322.021	C14H10O9	[M-H]-	Digallic Acid	Phenolic acids	Phenolic acids	536-08-3	2	10667000	9206800	14481000	4653300	4896200	6084200	5836800	5828800	5786800	6215300	5858800	6365600	11047000	9277400	9972500	3129400	2264800	3017200	2868300	2137300	2702300	4405900	4674000	3954900	8053000	12324000	16064000	3491800	4940500	3813000	5525000	3651400	4046300	4538800	4470900	3892600	5841400	5317700	6141800
pmn001516	325.06	125	326.064	C14H14O9	[M-H]-	5-Galloylshikimic acid	Phenolic acids	Phenolic acids	95719-51-0	1	2187800	2467200	2758500	1238300	1129600	1118000	945260	1019300	970800	2192600	2509900	2307700	1539400	2012100	1871400	667860	802320	700690	764690	834800	822110	1691400	1205900	1532500	1987400	2911500	3003500	1007600	1238000	947370	976720	864490	927210	1682900	1640900	1545500	1385700	1374500	1482200
pmn001515	325.06	93	326.064	C14H14O9	[M-H]-	3-Galloylshikimic acid	Phenolic acids	Phenolic acids	110082-91-2	1	415670	546580	492850	217020	228050	230950	181530	207410	198160	458840	498520	490090	369620	449540	434880	156160	171620	158610	184140	178070	195630	376670	249560	386030	475030	666150	576790	205510	241260	185370	216630	197610	197940	412810	386760	355520	291250	294980	293650
Zmzn001549	325.09	119.05	326.1	C15H18O8	[M-H]-	Ferulic acid-1-O-glucoside	Phenolic acids	Phenolic acids	14364-05-7	2	193440	171030	205830	456980	378520	247270	469860	437790	399450	209840	247030	234150	125320	261410	236960	279870	357480	398570	270310	254260	221260	221170	229250	210740	424030	485320	321530	409810	377310	396040	376660	222080	240070	424120	389640	443780	349370	204450	285730
Zmhn002301	325.09	163.04	326.1	C15H18O8	[M-H]-	p-Coumaric acid-4-O-glucoside	Phenolic acids	Phenolic acids	117405-48-8	1	3902100	3165700	2864600	1149400	789270	924840	901520	1149400	654700	1776100	1499700	1669000	2425500	1623500	3102500	1183100	832190	928900	991050	785300	946670	878250	938930	824520	3027200	3582800	3165800	1618700	1055700	1278200	1272200	1085400	795310	2493400	2738100	2627300	1711500	1784500	1614200
Lmsn003111	325.09	145.03	326.1	C15H18O8	[M-H]-	1-O-p-Coumaroyl-β-D-glucose	Phenolic acids	Phenolic acids	7139-64-2	1	5373800	4552200	5898100	8459400	7761300	8346900	6855800	9530400	7997000	5268700	5270000	5343900	2360900	2641900	2051200	4244400	3130900	3143900	3674500	4652900	4470200	2777300	4903400	3799900	7829100	11382000	9581400	12410000	9978200	9548100	10593000	15916000	9107500	12399000	11133000	11414000	7731900	7057000	6874800
Hmhn003067	325.09	119.05	326.1	C15H18O8	[M-H]-	Phenylpropionic acid-O-β-D-glucopyranoside	Phenolic acids	Phenolic acids	-	1	5215900	4072400	3414000	1208300	676030	973340	859940	1065700	889370	2016700	2027700	2175000	3090400	1609600	3195900	932890	1104300	1024100	1115600	1138100	1110500	929560	1004300	909710	3343200	4549800	3096800	1453300	1439800	1366500	1004200	1164600	1213900	3372400	3210500	3532300	2218400	2091000	1557700
Hmsn002272	327.11	165.05	328.116	C15H20O8	[M-H]-	Demethyl coniferin	Phenolic acids	Phenolic acids	-	2	5581200	5422600	7918300	9111500	10934000	12368000	10580000	9398100	10242000	889670	1426800	1344500	11353000	12435000	17140000	11019000	9647900	10343000	7757000	7388800	7725900	9044100	8214200	3596900	16648000	12478000	13409000	9496900	8910800	7682600	9324000	8564500	9700800	981930	615340	174710	8300200	8055200	6601600
Lmtn002233	327.11	165.05	328.116	C15H20O8	[M-H]-	Androsin	Phenolic acids	Phenolic acids	531-28-2	2	937120	1042900	1290600	1989900	2405100	1867600	1995700	1524000	1799800	192210	260100	251540	1566200	2100800	2922300	2124600	2089400	2043900	1524900	1617300	1441100	1888400	1646600	911840	2849600	2848100	3033100	2630500	2634400	1787300	1888700	2991500	1950300	282480	284350	48398	1498300	1446400	1169900
Lmtn002565	329.11	167.03	330.095	C14H18O9	[M-H]-	1-O-Vanilloyl-D-Glucose	Phenolic acids	Phenolic acids	-	1	303950	330420	396860	299500	356690	364790	271170	362880	315400	829570	611310	597830	585120	629280	593400	547610	694240	567160	683530	575710	687180	588830	684100	867980	486920	381500	422860	458190	514650	447370	400680	451320	496320	889950	716090	925420	487180	609360	519380
Zmhn001883	329.09	209.04	330.095	C14H18O9	[M-H]-	Vanillic acid-4-O-glucoside	Phenolic acids	Phenolic acids	32142-31-7	3	2306200	3088700	3419400	2471500	2074700	1674400	2345400	2235800	2160300	4491100	4265200	4175500	3356100	3261800	2889400	2055600	2646800	2187800	2270500	2491300	2516700	2965500	2614400	3222000	2234600	3056700	2705200	2092800	1966300	1881900	2062300	2029800	2064200	4054500	4691100	4246800	2417700	3150800	2358100
Lmmn003663	329.09	167.04	330.095	C14H18O9	[M-H]-	5-Glucosyloxy-2-Hydroxybenzoic acid methyl ester	Phenolic acids	Phenolic acids	-	1	448310	838900	731650	299130	257950	219360	271120	261260	295370	2220900	2021900	2175800	1080500	982440	1123700	317330	403270	318890	585830	880610	653620	1105200	572070	1433200	578110	542600	504470	168530	174760	220700	168330	215540	201530	967640	1189100	1077000	709350	661430	534150
Lmfn000604	331.07	169.01	332.074	C13H16O10	[M-H]-	6-O-Galloyl-D-glucose*	Phenolic acids	Phenolic acids	13186-19-1	1	106360000	106990000	116150000	60914000	65581000	69217000	68187000	70500000	71826000	91173000	103610000	100470000	69245000	67860000	62342000	50454000	48293000	45808000	57108000	60906000	63961000	61413000	62586000	58487000	64153000	68879000	75555000	70053000	57750000	59757000	46706000	60463000	76344000	69451000	77375000	70542000	72128000	74028000	63560000
Zmhn001703	331.07	169.02	332.074	C13H16O10	[M-H]-	5-O-Galloyl-D-hamamelose*	Phenolic acids	Phenolic acids	-	1	111010000	114200000	121170000	68497000	70202000	75646000	74060000	67463000	75015000	91761000	101060000	103910000	73667000	76337000	60972000	41431000	50393000	54575000	55564000	62833000	56507000	61033000	66979000	66712000	66653000	70586000	81394000	77554000	63968000	60148000	48267000	65375000	72071000	75549000	73202000	72944000	78817000	79554000	66451000
pmn001518	331.07	169.01	332.074	C13H16O10	[M-H]-	1-O-Galloyl-D-glucose	Phenolic acids	Phenolic acids	58511-73-2	1	9124300	11930000	11802000	14146000	13861000	12424000	14406000	14558000	14891000	10380000	8834000	13062000	8529900	6842800	6420600	11141000	9862500	11638000	10476000	10152000	9615300	10831000	11125000	7349900	11313000	11768000	13055000	13101000	13009000	12699000	11961000	12567000	12728000	8700200	8140300	8491600	9298100	8411600	9696800
Hmln000659	331.07	169.01	332.075	C13H16O10	[M-H]-	3-O-Galloyl-D-glucose*	Phenolic acids	Phenolic acids	-	1	99441000	110940000	98261000	56043000	62323000	66124000	67244000	63365000	68488000	80661000	88850000	101360000	62256000	66595000	58978000	45143000	48604000	48860000	54774000	58777000	47274000	61758000	61769000	51171000	64406000	57489000	80771000	65126000	61294000	52938000	42072000	63633000	55743000	76247000	66704000	63997000	72664000	79965000	67037000
Hmln000873	331.07	169.01	332.075	C13H16O10	[M-H]-	2-O-Galloyl-D-glucose	Phenolic acids	Phenolic acids	-	1	3272300	3722200	2698400	4893700	3547200	2830600	4030500	3449300	3719900	4310000	4279600	4747700	1592900	1523900	2152400	1271300	1477400	995240	639840	872580	1266100	331480	1100000	942910	853750	1677900	1774200	1874400	2095100	1701400	1894200	1125100	1952900	787280	503930	639000	1666200	2069400	1980000
pmn001519	335.04	124	336.048	C15H12O9	[M-H]-	Galloyl Methyl gallate	Phenolic acids	Phenolic acids	-	1	8901700	10914000	8613000	2150500	2842000	2084500	2577000	2858900	2453800	2831200	3321600	2713100	1355700	1840500	1821500	233720	140470	106920	122190	212670	188400	359730	445910	435360	1455100	3520400	3600600	535570	1238600	564550	1489700	744890	750190	702060	822880	553900	2013900	1771500	1776800
Zmhn005413	335.04	183.03	336.048	C15H12O9	[M-H]-	p-Dimeric galloyl methyl ester	Phenolic acids	Phenolic acids	-	1	26164000	35486000	26720000	6981700	9395600	7121600	8148900	9682500	8478900	9320100	11033000	8597300	3812100	6642600	6120100	503860	414690	371910	431800	630680	682290	1022300	1430400	1307100	4724300	11087000	11051000	1676200	3449000	2031300	4887000	2284800	2597900	1963200	2579400	1609500	6129400	5607400	6200200
Hmln002806	335.08	179.03	336.085	C16H16O8	[M-H]-	5-O-Caffeoylshikimic acid	Phenolic acids	Phenolic acids	180981-12-8	3	102640	119880	148170	185430	203900	164470	177610	146020	192400	33227	44968	61290	223770	170740	201300	321680	276250	392630	231990	223580	186770	188020	227310	127800	269760	159160	191440	269540	247260	203510	267420	280070	241740	89827	66860	95288	165630	164700	156460
pmb3068	337.09	173.1	338.1	C16H18O8	[M-H]-	1-O-p-Coumaroylquinic acid	Phenolic acids	Phenolic acids	-	1	16548000	12033000	17773000	6608600	9640900	9111000	8638800	8866800	8732400	8660100	7363000	8150100	19697000	19335000	22054000	14348000	12496000	14601000	12700000	16161000	15269000	14673000	14019000	17026000	14357000	17190000	16176000	11803000	8483200	10578000	9195900	10811000	9994700	15592000	15395000	16862000	11767000	11777000	11674000
pma6460	337.09	163.04	338.1	C16H18O8	[M-H]-	4-O-p-Coumaroylquinic acid	Phenolic acids	Phenolic acids	32451-86-8	3	11551000	16212000	11722000	13599000	15643000	15699000	15638000	15343000	15839000	13365000	13350000	13142000	14113000	13138000	18579000	16780000	11920000	15971000	12539000	15811000	14294000	15363000	14915000	15409000	12480000	9213900	9190200	11059000	11338000	13335000	11551000	8582300	10829000	12307000	10401000	11758000	13258000	14407000	11276000
pmn001421	337.09	191.05	338.1	C16H18O8	[M-H]-	3-O-p-Coumaroylquinic acid*	Phenolic acids	Phenolic acids	87099-71-6	1	1028000	692760	514960	1284900	1406300	1465700	1390400	1300500	1471100	731300	677020	721400	1213100	1481300	1308400	1656300	1564900	1508300	1333500	1335900	1202000	1288300	1392900	1225100	796780	912590	903070	1345400	1269500	1264500	1464400	1249800	1317300	759560	689880	764060	1057800	1113800	1017900
pmb3074	337.09	191.05	338.1	C16H18O8	[M-H]-	5-O-p-Coumaroylquinic acid*	Phenolic acids	Phenolic acids	1899-30-5	1	879950	612860	505170	1230300	1511100	1686500	1329500	1375100	1455700	613790	527790	584460	1427900	1522500	1543100	1625000	1991100	1925100	1655000	1793900	1432400	1935300	1979200	1688000	1039800	1115600	1179700	1548600	1531200	1536100	1800300	1863000	1850900	921120	932250	1003200	1382400	1501700	1073400
Zmpn002553	339.07	177.02	340.079	C15H16O9	[M-H]-	Cichoriin	Phenolic acids	Phenolic acids	531-58-8	2	1201000	888560	1036300	930380	1016700	926840	1123500	1179700	1060200	719590	605440	639440	1492100	1485800	1097100	1193400	1267400	1453600	1383700	1797400	996550	1222600	1617100	1068600	1422200	1787200	1506200	983210	1282500	1139600	1602800	1282500	1456000	1125700	1242300	1462400	1246100	1283600	1424200
Lmsn002548	341.09	161.02	342.095	C15H18O9	[M-H]-	1-O-Caffeoyl-β-D-glucose	Phenolic acids	Phenolic acids	14364-08-0	2	365740	378290	345330	294890	315020	280160	315430	284240	287130	445620	383410	346220	306190	344740	279250	268310	265600	280090	316100	351030	334690	364930	333590	335470	307730	327230	316570	276280	328290	317510	288160	320510	313760	407640	382720	399220	407780	390890	339750
Jmwn002620	341.09	161.02	342.095	C15H18O9	[M-H]-	Vanillic Acid-4-O-Glucuronide	Phenolic acids	Phenolic acids	-	2	371520	342880	370440	321820	295140	276690	320050	314330	294170	421240	398050	345410	301650	342930	260000	291980	256270	313220	343140	350020	332660	369560	314420	338260	330310	326870	312550	325510	313120	330030	303990	264380	315900	381270	378670	330570	399070	364650	369640
Zmhn001793	341.09	179.03	342.096	C15H18O9	[M-H]-	6-O-Caffeoyl-D-glucose	Phenolic acids	Phenolic acids	-	2	4208500	4086800	4161200	3682400	4453000	3475000	4722100	4409700	3424300	4571900	4042300	4260500	4468200	4358000	4360300	4034500	3400500	3419700	3640800	4260800	3761500	3147300	3462900	3849100	4575500	4909500	4484900	4643700	4297600	4421800	4534200	4602600	4533600	5485100	4846900	5053200	4489700	4421800	4056000
mws0906	341.12	179	342.131	C16H22O8	[M-H]-	Coniferin	Phenolic acids	Phenolic acids	531-29-3	3	1125000	1654100	1506400	1544200	1732000	902940	1089800	1079500	1245900	1450000	1310400	1258300	713270	1183100	1022400	1531700	660390	1047900	1077000	903420	1115000	761740	705670	1036500	493750	1259700	1060400	962180	750100	902150	1176700	1035800	1333600	788540	1057700	1129900	1100900	1270500	970180
MWSslk092	343.08	328.06	344.09	C18H16O7	[M-H]-	Usnic acid	Phenolic acids	Phenolic acids	125-46-2	3	9759.4	5895.6	23095	10555	27451	18519	21128	15408	18570	36820	15479	21192	1882.6	1985	1655.9	1831.3	1603.8	2093	3661.4	1556.6	3466.9	1836.1	1545	1942.8	7906.8	6505.7	5573.6	5296.8	5333.2	27459	3630.3	3394.8	3582.3	9264.6	6881.2	11879	10799	8235.5	8311.9
Zmln000899	343.11	181.05	344.111	C15H20O9	[M-H]-	Syringaldehyde-4-O-glucoside	Phenolic acids	Phenolic acids	-	2	104120	125310	122710	89387	71270	77733	84302	53398	80742	111260	96985	111890	86012	92775	89554	62371	81445	66587	85761	87895	93747	85047	98794	104420	84043	98176	67284	74811	89789	86979	81363	95303	91670	113520	106180	70093	115650	85137	102930
Lmmn000774	343.1	181.05	344.111	C15H20O9	[M-H]-	Dihydrocaffeoylglucose	Phenolic acids	Phenolic acids	-	3	43029	99881	62983	92292	107920	42095	96385	52797	95258	122960	87983	108660	77418	110860	72405	77858	61164	56627	38537	83254	42185	43057	90888	51030	82577	82250	50265	56176	69650	90144	80017	73149	65426	64247	84562	43124	47964	81838	46498
mws2108	353.09	191.05	354.095	C16H18O9	[M-H]-	Cryptochlorogenic acid (4-O-Caffeoylquinic acid)*	Phenolic acids	Phenolic acids	905-99-7	1	1068000	589830	501230	1729900	1817800	2001600	2017800	1892300	2166900	971180	980090	1233200	1820300	1389000	1707900	2342300	3296900	2424900	2070100	2246300	2011800	1872400	2060500	1886800	1550100	1352700	1391700	2591600	2490600	2116900	2898400	2133600	2101900	1195200	858090	1001800	1152200	1880100	1676100
pme1816	353.09	191	354.095	C16H18O9	[M-H]-	Neochlorogenic acid (5-O-Caffeoylquinic acid)	Phenolic acids	Phenolic acids	906-33-2	1	463890	287070	431990	155440	207980	194690	229660	171190	162280	112920	102240	121180	532080	368990	417340	208650	198030	181270	186710	322210	222720	208680	202550	201400	330330	466730	388200	229040	217880	207050	209160	234500	227500	189640	215510	215010	210630	242790	219120
mws0178	353.09	191.01	354.095	C16H18O9	[M-H]-	Chlorogenic acid (3-O-Caffeoylquinic acid)*	Phenolic acids	Phenolic acids	327-97-9	1	1093900	602040	383620	1660000	2316900	1385200	2551400	1699200	2012900	784480	802820	1071500	1385700	1344800	1691000	2209400	2469400	2018100	2309900	1595100	2407200	1977900	1842700	1317100	1592700	1389800	1100800	2138700	2319500	2095700	2925000	2556000	2373900	899540	808490	672300	1500900	1734300	1409600
Zmhn002422	355.1	193.05	356.11	C16H20O9	[M-H]-	1-O-Feruloyl-D-Glucose	Phenolic acids	Phenolic acids	-	3	515670	138690	133890	748090	997430	1112400	933030	768520	991750	457110	463080	496940	889340	1066500	1099000	1406100	1583000	1335100	1448700	1319600	951050	1033100	1222000	1063100	1198700	607280	927180	1365600	1314200	1458600	1618000	1416900	1325900	692230	689470	733350	882650	850780	860650
Hmmn002544	355.1	193.05	356.111	C16H20O9	[M-H]-	Ferulic acid-4-O-glucoside	Phenolic acids	Phenolic acids	117405-51-3	3	745660	446300	775320	270050	354310	350500	359890	321130	348760	214300	186410	218110	974830	584810	790430	379830	316540	381570	357180	634150	356680	402230	385520	340580	454640	732100	608340	413930	312180	338440	363610	327350	338730	320850	361760	359690	402730	445990	376350
Zmhn002334	355.1	193.05	356.111	C16H20O9	[M-H]-	6-O-Feruloyl-D-glucose	Phenolic acids	Phenolic acids	137887-25-3	3	1838500	1804100	1723600	784620	886280	840440	745100	926040	904980	1681900	1457500	1206500	1072600	1216400	1061900	832410	829770	976120	1048000	1278000	1062400	1049700	1021800	1349700	1687000	1343400	1247800	1188400	1079500	1039100	1216700	1294500	1195800	1961400	1920800	1985200	1076600	1121600	1159200
pmb3056	355.1	121.1	356.111	C16H20O9	[M-H]-	Homovanilloylquinic acid	Phenolic acids	Phenolic acids	-	3	667240	289530	321860	162180	219080	210460	216390	240340	203630	217010	154660	191430	369450	345680	313470	313080	235210	309030	312270	372540	332240	208130	248190	249640	520460	814700	779440	485090	349550	356990	525210	438850	456720	696750	648770	646870	238900	277600	280510
Zmhn003082	357.08	173.04	358.09	C15H18O10	[M-H]-	5-O-Galloyl-methyl quinine ester	Phenolic acids	Phenolic acids	-	2	54369	29129	26850	39083	40535	27165	27566	30404	24235	9233.2	5051.9	9719.4	118680	31996	16606	58928	67258	65968	53479	40938	39681	27091	26413	28803	16011	18441	15022	77341	42413	31983	52785	31399	24985	18670	25622	23914	44713	28306	30118
Lmsp004450	359.15	131.05	358.142	C20H22O6	[M+H]+	Dehydrodiconiferyl alcohol	Phenolic acids	Phenolic acids	97465-82-2	1	1866600	1570700	2555700	763340	1076200	842770	959430	952970	859180	2736000	2428100	2014500	1455900	1756400	1604400	881160	689870	850890	1180900	1865900	1331600	1603800	1115300	2235300	2468400	3431700	2979600	1595700	1630400	1371200	1918800	1461800	1921000	4913500	5081400	5128100	1726100	1837800	1682100
MWS20155	361.09	163.04	360.085	C18H16O8	[M+H]+	Rosmarinic acid	Phenolic acids	Phenolic acids	537-15-5	2	549460	556940	674620	731570	815240	789020	909060	810980	820170	844450	629760	592670	786820	918300	767640	1469100	1387700	1860700	1224400	1489300	1299700	1352200	1219300	1490000	1045300	856730	1115700	1561800	1346500	1357300	1611600	1501400	1176600	1503200	1416200	1469500	1072100	933210	983220
Cmsn000894	361.08	211.03	362.084	C14H18O11	[M-H]-	7-O-Galloyl-D-sedoheptulose	Phenolic acids	Phenolic acids	-	3	352650	403020	365330	487450	537000	403890	419380	439320	496490	300870	270570	324690	223610	208130	149170	100720	98207	101030	92522	88858	82650	86691	85446	78732	245100	250030	389660	147400	158650	130700	165340	141860	172550	117770	99729	107860	199980	173800	189640
pma3724	369.1	177.1	368.111	C17H20O9	[M+H]+	1-O-Feruloylquinic acid	Phenolic acids	Phenolic acids	-	3	1579300	1211400	868180	1128800	1318400	1519200	1330500	1060100	1303300	1366600	1277100	1339900	2672100	2657500	2333700	2302300	1912300	2074600	2444400	3279900	2604700	2699400	2431000	2502100	1641700	1394500	1566400	1757300	2055200	1670000	1965000	1859200	2003600	1763400	1986600	1847300	1408000	1680400	1612100
pmb0752	369.12	177.1	368.111	C17H20O9	[M+H]+	3-O-Feruloylquinic acid	Phenolic acids	Phenolic acids	1899-29-2	2	173400	144320	91108	68238	76512	98879	63862	93126	104870	165750	144640	153000	281260	318950	226000	219150	163170	226710	183500	433680	243020	293490	167040	375400	169020	180540	183970	114130	153900	115970	141460	132390	151530	306220	387750	376370	163890	189370	163980
Lmgn003073	735.22	367.11	368.111	C17H20O9	[2M-H]-	5-O-Feruloylquinic acid	Phenolic acids	Phenolic acids	-	3	4621	581	580.75	4158	2392.5	2935.5	4184.8	1774	2370.2	1741.5	7676.2	7674.8	11247	19172	7627.2	5747	6419.8	11549	16770	48028	22920	25991	19663	29889	8623.8	1161	11150	9855.2	6364.2	4690.5	17094	7483.5	11624	31558	25821	23030	6573	7075.8	3525
mws0179	367.1	190.9	368.111	C17H20O9	[M-H]-	Chlorogenic acid methyl ester	Phenolic acids	Phenolic acids	29708-87-0	2	163360	68752	54029	231250	298870	280640	250650	254610	279150	95766	90470	102360	227990	432690	353640	587350	507260	597000	445100	567500	517810	443710	525990	382900	314200	246890	210620	452330	435960	461250	753650	524270	662730	197680	206120	234820	277110	246590	300560
pmn001695	371.1	249.06	372.106	C16H20O10	[M-H]-	Trihydroxycinnamoylquinic acid	Phenolic acids	Phenolic acids	-	1	146380	113480	104820	126020	107680	118750	115760	153580	131740	274080	193520	199300	94682	87166	86595	62220	56349	64373	84821	92032	111240	88769	89287	171960	116870	37018	79291	44862	51748	68241	43145	43920	47359	204920	243450	229840	104980	105170	95942
mws0011	371.13	209	372.142	C17H24O9	[M-H]-	Syringin	Phenolic acids	Phenolic acids	118-34-3	3	30014	26828	34379	46840	43740	50273	59938	50614	44456	28313	21912	27162	59502	37191	45142	53714	42972	72066	60459	57075	61534	40195	47064	49166	65460	61067	62248	121760	97894	73060	73332	117300	89098	51553	40325	41268	54506	37576	50682
pmb0108	375.2	137.1	374.1	C19H18O8	[M+H]+	Feruloyl syringic acid	Phenolic acids	Phenolic acids	-	3	36638	69929	62735	51128	79578	63981	43941	42718	39459	48811	51192	43703	83770	64190	75916	72690	75990	59012	74912	74512	87355	67788	89614	62367	76743	103640	67718	96321	75051	95462	64592	91534	87471	66727	80264	72009	60470	64990	54548
Lmzn001582	387.17	207.1	388.174	C18H28O9	[M-H]-	5'-Glucosyloxyjasmanic acid	Phenolic acids	Phenolic acids	-	1	512240	439410	312460	509330	235180	394020	366020	320090	291940	282330	225780	202210	184720	205380	219820	308080	332980	429260	254040	168560	170790	200320	175870	169620	776850	1086000	1215700	1874700	1533700	1015300	2165300	2114600	2219500	1083000	912550	1038700	553580	476270	531360
Hmln003529	401.15	269.11	402.152	C18H26O10	[M-H]-	Benzyl β-primeveroside	Phenolic acids	Phenolic acids	130622-31-0	1	140090	135240	67004	96332	118340	62557	56770	75426	89780	111990	168210	196060	49929	52011	82538	118180	92025	55975	66262	49924	48829	45864	68444	32087	136620	107380	86603	77573	130190	117550	130050	88590	113270	65921	30177	43256	98206	97692	90210
Cmjn004337	401.14	269.1	402.153	C18H26O10	[M-H]-	Benzyl-(2''-O-xylosyl)glucoside	Phenolic acids	Phenolic acids	-	2	109520	59259	99255	130730	64894	55863	44883	93595	65249	50513	100460	141920	38944	52386	66677	66735	80155	62832	64615	73193	37617	57983	43065	51076	73210	52455	90357	80958	82287	130910	69849	110230	76876	37579	65114	55534	67933	44907	98042
Cmyp005063	425.18	147.04	424.173	C21H28O9	[M+H]+	Grandidentatin	Phenolic acids	Phenolic acids	15732-48-6	2	1026400	1110500	623790	1077600	923260	836660	1201900	1218400	1030300	523110	487300	662570	860620	947290	725710	766610	902750	773480	864210	786060	661160	598970	805740	559450	684990	679690	794910	691080	643530	699790	650560	611340	608740	297310	362520	341590	727810	775570	707290
Lmtn002324	431.15	269.1	432.163	C19H28O11	[M-H]-	Benzyl-(2''-O-glucosyl)glucoside	Phenolic acids	Phenolic acids	-	3	32113	13499	27134	49984	61822	49582	48612	36525	47148	33792	16183	33475	144990	129150	106220	156500	123900	127970	101020	126430	138920	153850	128740	111120	91559	93210	122580	102070	74464	79718	96318	65872	59164	92556	119170	76952	76805	67785	68021
Cmzn005251	433.11	271.06	434.121	C21H22O10	[M-H]-	6-O-Caffeoylarbutin	Phenolic acids	Phenolic acids	136172-60-6	2	160220	245230	289380	281130	278880	187550	294420	283920	193740	360180	370260	293330	194760	207840	158570	139320	144230	184510	227630	191880	220500	198660	231740	244710	239420	315360	273620	182680	298640	199050	260840	318620	336540	462420	500340	433890	204500	288880	230590
Lmhn002683	457.08	163.04	458.085	C22H18O11	[M-H]-	p-Coumaroylcaffeoyltartaric acid	Phenolic acids	Phenolic acids	-	3	71365	58605	79361	62072	78383	92296	62530	89934	65191	77483	74250	69246	82275	56070	44906	66129	45378	83550	57705	78514	48936	60379	69827	49922	99470	50723	66074	44988	58272	60969	66134	69693	100810	82938	63297	75544	118240	82733	66026
Lmhn002321	461.07	167.04	462.08	C21H18O12	[M-H]-	Vnilloylcaffeoyltartaric acid	Phenolic acids	Phenolic acids	-	3	24180	23477	14718	45202	17369	27718	3745.6	25904	16818	22300	29078	24532	24644	39087	21680	23845	32871	28890	21599	16492	39071	23364	18128	44852	29899	37025	18769	32679	25992	45684	38112	27836	21397	16306	22643	47020	60907	36572	30806
Lmsn005754	461.11	169.01	462.116	C22H22O11	[M-H]-	1-O-Galloyl-2-O-Cinnamoyl-β-D-glucose	Phenolic acids	Phenolic acids	56994-83-3	2	1611700	1704400	1136900	1071200	1221400	1258100	984110	1024900	883520	1015800	1182900	1227100	571590	668980	426060	337620	370610	304480	343330	299390	394310	402270	315890	343670	333310	477860	704610	324060	634850	471120	675620	430550	500420	253880	252780	238460	724230	678340	467870
Lmfn001344	467.08	169.01	468.09	C20H20O13	[M-H]-	Maplexin C (2,3-Di-O-Galloyl-1,5-Anhydro-D-Glucitol)*	Phenolic acids	Phenolic acids	-	1	241280	284030	261220	223560	236450	180200	179650	155220	215440	249580	260180	343920	254970	241400	146810	176360	122690	193550	160720	99968	133750	160690	104090	119140	161800	146670	167730	78102	105680	135770	166930	143170	109280	114800	126030	52781	145620	156930	178970
Lmfn001258	467.08	169.01	468.09	C20H20O13	[M-H]-	Maplexin D (2,4-Di-O-Galloyl-1,5-Anhydro-D-Glucitol)*	Phenolic acids	Phenolic acids	1355573-86-2	1	44291	64294	26905	23186	11354	17086	28090	31387	22553	54920	48429	80587	289810	203340	179140	13720	25123	22912	36804	59704	12492	66109	43424	29508	167810	147910	46348	28154	21793	25772	21387	28406	30042	47649	36922	19270	81203	65964	27538
pmn001523	473.04	169	474.043	C21H14O13	[M-H]-	Trigallic acid	Phenolic acids	Phenolic acids	2131-66-0	2	548290	617270	583370	711900	707510	724690	712180	801510	817300	461500	329370	531490	696820	687670	529880	718960	504880	749740	637860	597310	653540	609660	754050	498940	507650	407840	589370	636040	563530	581630	484470	453520	573830	354400	420960	326530	700520	909310	702550
Zmhn004909	477.06	169.01	478.075	C21H18O13	[M-H]-	3,4-Digalloylshikimic acid	Phenolic acids	Phenolic acids	-	1	48933000	51872000	41958000	48061000	47281000	37978000	45766000	48261000	46950000	51447000	40590000	48410000	49851000	45237000	46237000	40619000	41670000	39802000	41148000	42775000	42634000	40169000	41785000	46880000	42158000	45342000	49579000	37987000	41623000	40374000	42998000	42409000	44543000	44839000	41454000	55504000	46653000	49532000	44528000
pmn001525	477.14	169	478.148	C23H26O11	[M-H]-	3,5-Digalloylshikimic acid	Phenolic acids	Phenolic acids	95753-52-9	3	70872	34233	41834	37466	52182	50109	56201	44436	39034	62253	38387	7193.8	60027	98859	74162	80133	63438	75282	46963	46438	52918	82388	59839	78043	41576	37634	37650	53074	44413	105130	56218	69098	77080	29362	71926	22733	48329	22179	47409
Lmsn000842	481.06	301	482.07	C20H18O14	[M-H]-	4,6-(S)-Hexahydroxydiphenoyl-β-D-glucose	Phenolic acids	Phenolic acids	36378-48-0	2	37983000	58143000	33411000	24203000	31719000	24901000	23619000	20761000	23109000	30696000	32300000	30772000	15434000	18542000	14710000	7389000	6830600	5932300	7264200	6064700	7253000	8746800	6109200	6755900	14264000	14724000	19301000	8340600	10574000	9449500	16485000	7890800	12217000	9283700	7693900	6936000	15491000	17031000	13663000
pmb3072	481.14	319.3	482.142	C22H26O12	[M-H]-	3-O-p-Coumaroylshikimic acid-O-glucoside	Phenolic acids	Phenolic acids	-	3	42462	80898	58301	20228	30950	27710	18112	41067	13732	77272	49703	68341	54922	53065	65532	40095	51266	36702	47693	40218	44833	22705	49617	62410	56046	69158	40314	53634	62734	47614	47155	60092	50324	97338	79560	106490	46355	41574	33421
Wmhn001495	483.08	169.01	484.077	C20H20O14	[M-H]-	1,4-Di-O-Galloyl-D-glucose	Phenolic acids	Phenolic acids	-	2	12226000	9479300	15448000	5505000	3530500	1953200	3891600	6914600	3327300	8607600	11969000	12092000	7732200	4308500	5169600	2417600	2500300	3517300	3273300	1796700	2946600	4360400	4075500	4239300	7391400	6031700	10050000	2002100	2340500	3351100	4066300	1499200	3403700	3989000	3129300	3071200	6080600	5167000	5792200
pmn001629	483.08	169	484.085	C20H20O14	[M-H]-	Digalloylglucose	Phenolic acids	Phenolic acids	-	1	36530000	34167000	28721000	27557000	22332000	24576000	23829000	21859000	21760000	37965000	29805000	34086000	26014000	29395000	22629000	12863000	14897000	11759000	17242000	13680000	13370000	17991000	15712000	15457000	30772000	19641000	31260000	10934000	18211000	13966000	15453000	13395000	13289000	12849000	11663000	12813000	19480000	20965000	24348000
MWS20202	485.09	153.02	484.085	C20H20O14	[M+H]+	1,6-di-O-galloyl-β-D-glucose*	Phenolic acids	Phenolic acids	-	1	3968300	3209200	3522700	2040100	1360500	830090	1177700	2068300	1052200	3081100	2636800	1582300	1684100	2059700	1549700	1135200	613380	884730	622200	597690	560450	1166400	1116600	722280	1957500	922790	1617200	817140	586530	772980	887760	847040	1009100	615810	584100	631150	1308500	1449400	985090
Hmlp001270	485.09	153.01	484.086	C20H20O14	[M+H]+	2,3-Di-O-galloyl-D-glucose*	Phenolic acids	Phenolic acids	-	1	2930500	3486800	4505000	1763300	1107000	704610	1385400	1056100	1022600	2923900	1539100	1453300	1837100	1442900	1471300	627940	912390	366590	714300	550940	830400	1251300	1186400	852040	1888200	889080	2480800	671770	746790	610080	700260	920190	701860	631450	972570	547920	1825400	971070	1107700
Zmhn003297	495.08	343.07	496.085	C21H20O14	[M-H]-	3-O-Digalloyl quinic acid	Phenolic acids	Phenolic acids	-	1	17023000	20652000	19662000	11399000	11282000	10979000	11883000	11066000	12197000	9599200	9992600	10266000	14992000	15878000	16450000	5668500	6883900	6295500	5468600	6253500	7148900	8944800	8795500	8547300	12579000	16427000	17770000	7541600	10365000	9053600	13347000	8750600	10353000	9896300	10173000	8631800	10253000	11360000	10352000
Lmgp003989	499.13	163.04	498.116	C25H22O11	[M+H]+	Dicaffeoylshikimic acid	Phenolic acids	Phenolic acids	-	1	523640	368700	192040	923740	1049800	544180	1153600	898660	1187100	114380	351980	301070	411100	804840	678930	772530	1043600	491710	921040	174720	889850	827750	1028800	626090	603730	1121400	898000	888410	1190100	928440	966970	459300	301820	413980	272240	430880	939520	841160	985110
pmb3061	499.15	163.1	500.153	C22H28O13	[M-H]-	5-O-p-Coumaroylquinic acid O-glucoside	Phenolic acids	Phenolic acids	-	2	223900	172870	151480	130080	151240	109570	139280	108570	134450	149910	79675	132670	183970	136050	163430	192050	221110	182980	265430	198530	158260	102740	203520	166200	226490	262280	247340	286960	219090	254430	400470	361840	341520	248910	150740	228150	168810	124050	187760
pmb3064	499.15	163.2	500.153	C22H28O13	[M-H]-	3-O-p-Coumaroylquinic acid-O-glucoside	Phenolic acids	Phenolic acids	-	2	546860	444790	440560	509810	436020	449630	646180	544280	577280	558410	470760	433530	314340	372960	376470	546650	518390	618500	567260	533740	627370	461080	544220	415680	617810	584640	582210	796740	682340	581950	887380	794840	991720	667490	673520	694410	554190	570320	573050
mad2394	501.1	337.05	502.111	C24H22O12	[M-H]-	Sinapoyl-p-coumaroyltartaric acid	Phenolic acids	Phenolic acids	-	2	220010	168060	223010	110850	158710	140040	110930	110130	161690	265510	258750	315590	221020	264190	255780	141360	145730	123760	196560	190180	228350	247240	239400	331840	126220	303780	234130	110910	134130	122500	92929	91865	109020	390870	439720	419560	205610	146850	159050
Lmsn004970	503.12	179.04	504.127	C24H24O12	[M-H]-	3,6-Di-O-caffeoyl glucose*	Phenolic acids	Phenolic acids	-	3	1764100	1205400	974480	2927900	3507100	3102400	3633800	2918300	3569200	1333700	1493600	1591800	3685400	3842700	4161300	5812000	5288800	5431900	5266400	5961600	6002500	4874400	4451200	3721000	3697700	3523000	3368200	6429300	5576900	5362900	5929600	6342100	6273200	2530600	2237000	2249500	4026200	3754900	3853400
Lmsn004322	503.12	179.03	504.127	C24H24O12	[M-H]-	1,6-Di-O-caffeoyl-β-D-glucose*	Phenolic acids	Phenolic acids	-	3	1650800	1119800	782040	2613900	3112200	2965900	3367100	2765100	3540500	1386800	1339200	1354100	3530000	3554700	4081900	5231800	5084000	5071500	5013900	5868600	5459200	4600700	4604900	3695400	3359600	3547700	3189700	6258900	5058700	5270000	5993900	6232200	6067700	2333800	2396000	2513900	3488000	3532600	3670800
Cmsn001563	513.09	361.08	514.095	C21H22O15	[M-H]-	1,7-Di-O-galloyl-D-sedoheptulose	Phenolic acids	Phenolic acids	-	3	59486	61922	78637	97420	67872	82641	105510	86534	70092	66673	70265	105280	83549	88599	53422	44830	44269	40252	44652	46655	30338	49286	45594	36771	140270	69862	116950	60594	55340	64590	24727	48086	42271	46661	36760	37059	46974	61447	56570
Li512115	515.12	353.09	516.127	C25H24O12	[M-H]-	Isochlorogenic acid B	Phenolic acids	Phenolic acids	14534-61-3	1	2615500	1155500	1404900	8988100	7363300	4577900	10841000	6591000	9699300	2345200	2302300	3321800	9630800	6170600	7988900	12944000	10347000	10677000	11033000	11986000	8675700	8132600	10685000	8257200	5484800	8643200	6207600	7269600	9569800	12856000	13463000	10490000	8971400	3489700	3382800	4032800	6390100	7575000	7128900
MWSmce346	517.13	163.04	516.127	C25H24O12	[M+H]+	1,3-Dicaffeoylquinic acid	Phenolic acids	Phenolic acids	19870-46-3	1	1446100	972530	889630	7493300	8087700	8458700	7908900	4788000	7561500	1500700	1195300	1701100	3604000	3058700	2761600	7263600	6763800	6230100	5756000	4305100	6940300	5388200	5974600	4606300	1788600	2612700	2668900	4465000	3922000	5269900	3663000	3906200	3164900	919490	878250	823670	3256200	3533800	3258300
pmn001382	515.12	353.09	516.127	C25H24O12	[M-H]-	Isochlorogenic acid A	Phenolic acids	Phenolic acids	2450-53-5	1	256820	241820	158050	994040	1026100	831560	1226000	1324300	1534300	302170	256610	343680	752390	493430	363050	824600	1154200	694780	431550	473850	689750	477890	518520	305480	411250	434180	395310	626490	614490	564550	608230	702380	615080	250530	178990	126630	515770	765970	542980
Wmzn002116	515.12	353.09	516.127	C25H24O12	[M-H]-	3,5-Dicaffeoylquinic acid	Phenolic acids	Phenolic acids	-	3	29506	23481	23470	48701	44110	49653	63744	54606	67467	27007	33760	44624	23466	34058	44293	48169	76981	49153	56984	78965	60438	41473	46912	44539	49203	40746	47645	70594	88838	61736	83646	64680	96914	50599	27027	23533	39682	44575	36258
pmn001384	515.12	353.09	516.127	C25H24O12	[M-H]-	Isochlorogenic acid C	Phenolic acids	Phenolic acids	57378-72-0	1	10677000	5918200	5250700	25991000	26873000	24312000	19316000	23916000	29376000	8185300	7564200	8853900	14775000	19065000	9618300	24701000	18840000	17908000	22819000	13831000	14954000	18393000	18296000	10501000	9798400	16556000	12103000	21196000	23139000	22273000	19041000	17540000	19965000	7114800	3905500	5640700	17312000	16321000	14189000
Lmhn003246	517.1	223.06	518.106	C24H22O13	[M-H]-	Sinapoylcaffeoyltartaric acid	Phenolic acids	Phenolic acids	-	3	84535	51487	50327	24602	39689	47168	38752	36916	25350	44541	33900	58135	71165	97005	64794	69120	54058	69061	52221	57270	43542	37861	63816	28103	68090	49024	56516	77266	81881	78147	82068	71521	77777	47233	71324	51852	55035	56258	58868
Lmsp003655	521.2	131.05	520.194	C26H32O11	[M+H]+	Dehydrodiconiferyl alcohol-gamma'-O-glucoside	Phenolic acids	Phenolic acids	-	2	324720	572800	373470	388780	398530	311080	475990	343050	407550	637050	490000	618500	420800	406710	399650	253770	224960	295860	323010	377410	315350	294980	358280	406440	344720	320780	319880	279550	319870	342320	271790	217490	226640	513370	345380	421360	255460	356640	348180
pmn001710	521.13	359.08	522.137	C24H26O13	[M-H]-	Rosmarinic acid-3'-O-glucoside	Phenolic acids	Phenolic acids	910028-78-3	2	38442	47054	31956	33183	34150	42678	46034	46601	33423	21274	29666	54046	49723	53569	51000	27302	50727	33547	39164	56191	51409	38867	24764	25266	37970	20277	27485	55569	66025	56720	33322	45784	48528	37691	12585	16994	42739	27587	28746
Zmcn005156	529.13	353.08	530.142	C26H26O12	[M-H]-	4,5-O-Dicaffeoylquinic Acid Methyl Ester	Phenolic acids	Phenolic acids	-	2	86388	19539	10819	49182	71635	56683	54311	50882	60375	25420	16916	17925	68466	72855	68651	103780	94792	69673	87424	69234	82285	94839	83137	61274	31194	57202	52007	86131	80851	83564	75254	80654	90275	17145	21026	12252	61591	35977	52075
Lmjp003731	531.15	177.06	530.142	C26H26O12	[M+H]+	3,4-O-Dicaffeoylquinic Acid Methyl Ester	Phenolic acids	Phenolic acids	-	3	44750	39834	15622	56412	70228	28117	60388	55789	57656	19535	28425	35575	71313	69830	58844	54794	46387	39774	58851	51446	46240	67162	55714	41031	17367	21952	71593	50498	34383	47176	51989	35459	29665	16092	25452	19154	32966	38907	37509
Smcn001947	623.2	161.02	624.205	C29H36O15	[M-H]-	Verbascoside	Phenolic acids	Phenolic acids	61276-17-3	3	24727	625870	82634	19306	15222	16656	19305	32748	14620	9	9	9	61154	133290	94685	38632	30446	33564	15447	14113	21105	21867	34771	9620.9	170790	31264	291500	20961	31602	30780	30547	49797	30432	9	9	9	51614	53064	55603
Lmfn001337	635.09	169.01	636.096	C27H24O18	[M-H]-	1,2,3-Tri-O-galloyl-D-glucose	Phenolic acids	Phenolic acids	-	2	1189600	1450900	2178800	519330	413450	461060	328160	581130	469150	1321100	1923100	2529100	617880	371760	175760	115900	110700	113030	121960	171930	67441	244630	178040	157180	534390	335650	870640	129300	132000	92216	200320	90402	120290	179360	221800	160700	531950	684020	647630
Lmsn003088	635.09	169.01	636.096	C27H24O18	[M-H]-	1,4,6-Tri-O-galloyl-β-D-glucose*	Phenolic acids	Phenolic acids	94513-58-3	1	63100	101510	85875	50596	37846	35012	33861	21976	54784	56467	90287	85069	85271	77685	36490	21942	13638	15636	15186	20230	16286	54005	14793	27734	103920	65690	60737	13597	12686	16359	9348.8	18818	11358	28980	11564	28937	47614	49980	24147
Lmsn003023	635.09	169.01	636.096	C27H24O18	[M-H]-	1,3,6-Tri-O-galloyl-β-D-glucose	Phenolic acids	Phenolic acids	18483-17-5	1	17681	51129	40724	17794	19510	40694	27379	26519	26198	37251	36923	35940	31924	39535	13695	18504	14840	4473.8	23900	16170	11093	14331	14643	13870	44964	30475	38203	12345	22600	7984.8	30662	8749.5	12802	18678	15426	20220	29044	32714	10190
Zmdn003203	635.09	169.01	636.096	C27H24O18	[M-H]-	1,2,6-Tri-O-galloyl-D-glucose*	Phenolic acids	Phenolic acids	-	1	92436	136880	77322	45181	24370	29115	50318	40385	40368	92285	87987	140000	90428	78000	43490	25420	25469	9968	35794	22247	11221	64553	6219.5	36054	96566	84824	74368	5927.5	14779	25489	19980	16174	26534	38963	27745	19491	30028	44644	28789
HJN102	677.17	515.14	678.158	C34H30O15	[M-H]-	3,4,5-Tricaffeoylquinic acid	Phenolic acids	Phenolic acids	86632-03-3	3	291910	153640	61006	360840	542480	457400	506450	404320	574440	151060	144670	133480	370840	331410	286510	270790	274470	205100	252140	224170	233040	221320	250280	222740	155640	466300	431590	389580	385740	446430	323390	315430	436440	98849	124580	90873	294010	336410	269850
Lmgn002253	695.2	353.09	696.19	C31H36O18	[M-H]-	Syringoylcaffeoylquinic acid-D-glucose	Phenolic acids	Phenolic acids	-	2	194650	154280	149260	241420	266490	276570	310850	208660	252320	87125	118430	89473	303300	280790	299760	364490	363370	341880	381420	471120	346030	341550	311080	224210	560540	351910	273460	508540	389000	391250	444750	457950	495750	172210	123820	155600	213390	252700	329320
Hmcn001989	755.25	593.21	756.248	C34H44O19	[M-H]-	Lavandulifolioside	Phenolic acids	Phenolic acids	-	2	403120	422460	681750	929820	782080	838600	775970	894060	666400	483210	392140	397060	427070	440000	484200	587930	628540	558900	616700	464850	558710	502760	435940	351240	697050	455210	476140	732830	583200	613820	544810	603850	594140	492790	446970	549470	669660	541430	449330
Lmsn003625	787.1	635.09	788.107	C34H28O22	[M-H]-	1,2,3,6-Tetra-O-galloyl-β-D-glucose	Phenolic acids	Phenolic acids	79886-50-3	2	1099300	2106200	1267900	279930	370960	177500	380510	513480	281250	338320	467510	267130	60412	157630	164180	3835.9	3676.4	9108	5341.5	9088.2	13136	15931	18804	10287	67308	303580	278510	61317	109280	80517	205050	79841	60439	53880	59525	54023	346500	272440	205750
pmn001546	943.11	791.1	944.113	C40H32O27	[M-H]-	Methyl Pentagalloyl gallate	Phenolic acids	Phenolic acids	-	3	14871	14241	11689	12395	9749.2	10665	13451	6664.7	10037	15295	15998	12231	13993	13015	8014.4	11516	10334	13585	13617	12944	11859	8347.7	7685.2	7966.2	8898.9	10264	10162	14704	17897	14465	31177	17829	20918	15750	14483	14337	11777	9358.2	9604.7
MWS2076	110.06	65.04	109.053	C6H7NO	[M+H]+	2-Aminophenol	Alkaloids	Phenolamine	95-55-6	3	46012	27324	27099	30763	42920	37561	50530	59611	46996	32046	23627	42958	23732	35653	44930	42178	25003	35100	22429	19295	30568	32880	39479	38462	84911	74373	68846	78730	83546	79258	154130	126130	123660	69011	80392	67916	66154	55241	66371
Lmgp000796	150.06	61.01	149.048	C8H7NO2	[M+H]+	4-Hydroxymandelonitrile	Alkaloids	Phenolamine	13093-65-7	3	115170	374820	360070	401770	303590	397100	227670	77255	210750	209210	262320	349790	464740	174670	132640	346530	419340	412180	463770	427650	395440	258450	156650	110600	393320	235790	466860	383880	207080	196890	33408	74350	179700	113060	49120	49186	59326	81020	61116
mws0596	154.05	136.04	153.043	C7H7NO3	[M+H]+	3-Hydroxyanthranilic acid	Alkaloids	Phenolamine	548-93-6	3	64816	63377	28408	24997	41058	24080	24985	35200	24525	19536	23336	29139	54333	23166	61749	45976	32471	32304	36698	31711	25683	28108	31955	30505	57413	27041	29929	51150	51926	26862	65989	36303	28664	29382	7832	32371	30506	37697	34465
mws4002	154.09	137	153.079	C8H11NO2	[M+H]+	Dopamine	Alkaloids	Phenolamine	51-61-6	3	41531	28506	12874	23991	37463	16279	30250	17940	32807	46803	47021	12642	67372	44343	68752	39463	37603	51497	35496	35034	32420	36455	28675	16505	39674	93264	69805	76049	63707	61718	27369	47186	64318	59912	37448	41376	34423	49138	29004
Hmcp009963	180.14	123.07	180.138	C11H18NO+	[M]+	Candicine	Alkaloids	Phenolamine	6656-13-9	2	122720	120110	143880	138770	123600	138360	153890	110560	158050	197280	125370	183360	176750	171090	156670	169220	124060	176450	175690	164720	204370	207740	176030	175140	155320	209880	177610	192070	134520	180190	178560	157550	157710	170230	169840	172150	137200	139830	142160
MWStz070	182.08	91.05	181.074	C9H11NO3	[M+H]+	N-(2-Hydroxy-4-methoxyphenyl)acetamide	Alkaloids	Phenolamine	58469-06-0	1	5716200	4306400	4024200	5395600	3629400	3713200	4435600	3359600	3908900	4432900	3312600	7897300	5689400	6576300	4962300	9456900	7192500	5147300	9081000	8154500	5203600	4515300	6793500	2811900	2240900	2293100	2302600	2312900	2167200	1051800	1349900	1848500	1403800	1096000	1321800	1107200	3539300	3181700	2873300
pmb0490	235.14	147.04	234.137	C13H18N2O2	[M+H]+	p-Coumaroylputrescine	Alkaloids	Phenolamine	34136-53-3	3	37416	32596	63002	236070	249400	186880	173680	170360	202360	67325	41479	91721	46690	32490	28584	92246	99971	96087	122750	93879	129190	57356	96095	66491	52888	97164	76120	133370	83199	124580	141850	170820	151240	55949	86694	109240	106610	98321	92684
Lmhp002772	249.16	147.04	248.152	C14H20N2O2	[M+H]+	p-Coumaroylcadaverine	Alkaloids	Phenolamine	-	3	8470.8	13354	27090	6130.2	13494	17347	30164	18712	16620	7875.2	20998	9850.2	7401	29694	20894	10976	4866.5	5907.2	13539	12761	16662	7345	6781.8	12385	10160	8327.8	17276	11173	13604	6161	7103.5	8578.2	15582	11040	8976.2	9310.5	13718	16713	11004
Lmlp003161	265.15	177.06	264.147	C14H20N2O3	[M+H]+	N-Feruloylputrescine	Alkaloids	Phenolamine	501-13-3	2	202640	502430	383250	1637700	1894500	1741400	1563800	1449600	1621500	445660	447110	578040	518350	506180	553910	1153900	1326600	1412500	1132600	1141400	1151900	724680	936440	680520	700050	1186300	1002700	2303700	2147600	1860900	2508200	2994100	2126600	1438700	1446100	1478500	1007200	1060800	1134400
pmb0508	277.17	147.04	276.159	C14H20N4O2	[M+H]+	p-Coumaroylagmatine	Alkaloids	Phenolamine	7295-86-5	2	2377300	2523000	2249200	3064700	4200600	3882000	3596700	4124700	3847400	1618300	1095800	1022900	3455200	3244900	3647600	8204500	7846700	8171600	6801400	6607000	7338900	5888300	7146700	4788900	1814400	3162800	3186100	5328000	4087800	4708900	4606100	5009100	4876600	2048100	2102300	1851300	3500300	3799900	3776300
pma0101	293.16	163.04	292.154	C14H20N4O3	[M+H]+	Caffeoylagmatine	Alkaloids	Phenolamine	-	3	746950	514130	418230	680760	1054200	907110	778380	669210	862080	428750	309780	470740	955100	839810	1047500	1100900	869090	1107700	1007100	1006100	1145100	1350200	991990	977660	665520	1025200	1174100	873090	771050	1031700	788100	1203500	976300	784940	542500	694960	790290	881370	759130
pmb0496	307.18	177.05	306.169	C15H22N4O3	[M+H]+	N-Feruloylagmatine	Alkaloids	Phenolamine	-	2	34412000	30033000	30311000	29170000	30393000	30207000	30493000	32684000	27954000	31587000	26592000	27735000	33257000	32843000	31974000	36727000	34862000	34311000	38193000	38272000	38149000	29826000	35394000	34666000	36783000	37107000	34053000	38603000	35108000	35068000	37554000	40686000	35048000	43700000	40351000	41712000	28684000	36065000	31395000
pma1839	309.18	207.07	308.174	C16H24N2O4	[M+H]+	N-Sinapoylcadaverine	Alkaloids	Phenolamine	-	3	147230	102900	91202	111710	109760	107430	89041	118110	108730	111010	101820	100890	91419	113260	120310	104550	100310	119170	117140	113230	105210	110990	112420	111210	130360	136000	94646	135140	142320	112540	122620	123260	144950	137520	136580	146410	112280	118600	103160
Lmap001823	312.11	132.04	311.101	C14H17NO7	[M+H]+	Dhurrin	Alkaloids	Phenolamine	499-20-7	3	41021	62736	63558	65876	70704	46271	82053	42677	47213	64078	55910	38785	51353	46617	66774	41890	29099	68729	42936	34538	28057	37438	31220	26372	470850	830710	652920	349730	410440	220320	297380	388690	469850	669250	445460	408210	185990	145090	160910
pmb0325	322.21	177.05	321.205	C17H27N3O3	[M+H]+	Feruloylspermidine	Alkaloids	Phenolamine	-	3	23526	13792	18034	33781	17861	18419	8733.8	19894	14800	43434	23594	15376	88730	117580	134430	136830	97130	107570	81584	79919	113770	137910	127300	72682	33466	28657	39591	49456	47466	20822	37691	16421	31788	17126	32940	57194	31889	12575	36229
pmb0503	439.22	147.04	438.211	C20H30N4O7	[M+H]+	N-(4'-O-glycosyl)-p-coumaroyl agmatine	Alkaloids	Phenolamine	-	3	16837	13772	12930	8150.9	8135.2	10372	12319	9036.1	7054.2	22639	24386	24065	15158	27345	13496	30326	34138	27265	26658	30727	33000	29042	26254	29167	14728	7920.4	13260	7394.5	6549.2	23212	10667	14309	11282	24048	23275	23445	14306	12574	11290
pma0702	558.28	207.07	557.274	C29H39N3O8	[M+H]+	N1,N8-Bis(sinapoyl)spermidine	Alkaloids	Phenolamine	-	3	2884100	1597100	2705400	2660600	2366400	3137300	2555100	3027300	3007900	1135800	1380000	1559000	1973100	2393200	1617200	2743400	3204900	3033500	3207900	2274700	1995200	1923200	2531700	1566600	2318100	1248400	2463100	3038700	2632500	3159800	2635600	2856600	1561500	1342900	1589700	1177300	1874100	2234500	1838500
pmb0492	584.28	325	583.268	C34H37N3O6	[M+H]+	N',N'',N'''-p-Coumaroyl-cinnamoyl-caffeoyl spermidine	Alkaloids	Phenolamine	-	3	422370	258950	365400	459430	567070	424240	465170	599830	479880	303950	296590	319510	274180	278340	401150	538850	618130	429300	497580	398230	438140	415780	549820	418880	308890	285480	376620	414160	388120	462530	387880	395350	314530	317400	327280	327800	357780	394790	436100
Cmmn012461	299.2	299.2	300.209	C20H28O2	[M-H]-	Dehydroabietic acid	Terpenoids	Ditepenoids	1740-19-8	1	199070	233530	228910	267430	200370	180040	298200	232140	197630	268140	206650	240780	1247600	388280	346610	358170	210250	213660	248710	234940	225380	544440	492570	343940	571390	647040	397110	476990	825170	311520	782800	896100	492730	1063300	511530	460920	373100	397650	371950
Cmmn013275	301.22	301.22	302.225	C20H30O2	[M-H]-	Isopimaric acid*	Terpenoids	Ditepenoids	5835-26-7	1	9	9	9	9	9	9	9	9	9	9	9	9	2885000	523260	412520	323050	145900	150380	275650	190860	156580	877710	715300	472770	471200	564480	290850	369150	637150	183020	780310	730780	401700	802340	398390	291140	553240	519410	474900
Lmbn014696	301.22	301.22	302.225	C20H30O2	[M-H]-	Pimaric acid*	Terpenoids	Ditepenoids	127-27-5	1	9	9	9	9	9	9	9	9	9	9	9	9	3028300	500580	345210	328630	159970	120170	227070	180970	149260	888900	727420	483390	471440	601780	266790	392430	733980	175200	752030	727470	351940	874470	397350	318050	574780	519960	475830
MWSslk208	301.22	301.22	302.225	C20H30O2	[M-H]-	Kaurenoic Acid	Terpenoids	Ditepenoids	6730-83-2	2	9	9	9	9	9	9	9	9	9	9	9	9	3003800	500230	353660	321900	145200	119180	277950	164880	177360	788860	662510	466410	507870	575050	277810	393250	715140	208950	660080	760500	374680	892380	404450	297360	537100	616950	512120
mws0914	271.06	151	272.068	C15H12O5	[M-H]-	Pinobanksin	Flavonoids	Flavanonols	548-82-3	1	1025300	992820	540050	298790	362660	282180	372110	448440	327310	581180	597150	500160	377650	719230	368070	191120	178710	176330	195200	228410	265340	214730	347470	401260	766120	1015400	680390	723380	857800	794270	1221500	1014600	802550	1093000	1277500	1269000	580300	712930	642710
mws1094	287.06	259	288.063	C15H12O6	[M-H]-	Aromadendrin (Dihydrokaempferol)	Flavonoids	Flavanonols	480-20-6	3	150620	150790	138020	121050	102990	134510	114200	109720	110160	191090	211110	187790	31043	24673	29582	36739	33738	40210	34312	41996	46629	48997	55325	46550	123200	125970	208260	248880	276640	268300	282380	242850	256920	480790	447970	364890	125540	150580	153890
Cmsp004086	303.09	229.08	302.079	C16H14O6	[M+H]+	Dihydrokaempferide	Flavonoids	Flavanonols	137225-59-3	2	1082800	722390	538970	1085900	712710	864700	827370	622400	798750	432140	592090	878570	813330	612920	313850	716970	454970	641610	981350	559230	332430	305080	492590	317290	874280	1247800	828200	1300200	986260	906520	839210	1527200	1293900	1005400	912370	726980	702960	950130	1028500
mws0044	303.05	125.02	304.058	C15H12O7	[M-H]-	Dihydroquercetin(Taxifolin)	Flavonoids	Flavanonols	480-18-2	1	848650	782230	707340	528960	451130	453010	537440	468040	480540	844480	749270	732910	465440	452540	530120	312990	204270	334050	345460	482210	332510	482370	573410	706590	630420	678370	707590	747790	756590	720300	801620	861760	810510	1322700	1251800	1165100	591610	559050	628790
mws1174	313.07	253	314.079	C17H14O6	[M-H]-	3-O-Acetylpinobanksin	Flavonoids	Flavanonols	52117-69-8	2	2607800	1941900	1478700	2699600	2360700	2751500	2543200	2051100	2679700	3167700	3043700	3571800	7848.4	3028.7	2090.8	4044.2	5491.8	11866	6845.4	12589	4470.2	5027.5	7405.5	3881.9	24691	37284	31158	14616	21160	29168	15518	25945	18640	27470	21216	31066	762620	760550	730990
mws0744	319.05	301	320.053	C15H12O8	[M-H]-	Dihydromyricetin (Ampelopsin)	Flavonoids	Flavanonols	27200-12-0	1	2508400	2681500	2455400	976700	966480	890800	1018300	1085000	1022400	2375700	1997300	1970100	1539300	1832700	1591400	1050900	953450	1126900	1369300	1866300	1485700	1595300	1295400	1871800	2070700	1855000	1882900	1206700	1360400	1236800	1245000	1333700	1413700	2782700	3080600	2906600	1533100	1513600	1591100
Lmlp005236	451.12	289.08	450.116	C21H22O11	[M+H]+	Dihydrokaempferol-3-O-glucoside	Flavonoids	Flavanonols	1049-08-8	2	5007300	7597300	6158200	2418200	3686200	3214700	3118700	3505200	2911700	6640500	6884300	5696800	4975600	3949500	3606000	1716100	1646900	1707800	2483900	2705500	2106600	2381800	2302200	3531200	4220500	6613600	4908200	2551600	2335700	2165700	2252300	2306300	2164600	4859300	5811700	4785000	3946000	4157300	3103600
Lmmn004625	449.11	287.06	450.116	C21H22O11	[M-H]-	Dihydrokaempferol-7-O-glucoside	Flavonoids	Flavanonols	-	2	412770	444270	422820	285530	260760	256080	303770	295310	287560	493160	334650	326170	558220	584850	506780	721740	507360	561410	674410	678740	572330	490910	562160	484900	752710	631270	850200	721640	677660	745810	691480	648250	535250	910910	744340	935180	570870	469570	445550
mws1361	449.11	151	450.116	C21H22O11	[M-H]-	Taxifolin-3-O-rhamnoside (Astilbin)	Flavonoids	Flavanonols	29838-67-3	3	214930	243970	134490	100380	94597	91144	116260	110480	105220	469170	434430	378580	235630	256610	244680	150480	221480	140130	275510	380590	320680	134990	148780	338240	293190	344360	396100	186970	195270	203570	211430	214950	241720	1921200	1854200	1875500	351770	341540	327970
Lmtn002796	449.1	287.05	450.116	C21H22O11	[M-H]-	Aromadendrin-7-O-glucoside	Flavonoids	Flavanonols	28189-90-4	2	1133600	1015100	2637300	2389900	2945100	2954700	3450600	3321600	3587300	1100900	890200	1351700	1959100	2697900	1888400	3903300	2736600	3310400	2431300	2603100	3020700	1954200	3583200	2739200	1583100	2599500	2403800	3842200	3009800	3496000	3077600	2795600	3496600	2165400	2342700	2439000	2547500	2156900	2651000
HJN104	481.14	319.08	482.105	C21H22O13	[M-H]-	Dihydromyricetin-3-O-glucoside	Flavonoids	Flavanonols	-	3	93625	102750	63813	33669	20792	29210	32467	28031	40534	63076	79296	64574	81005	58492	53137	51245	45420	39555	53754	72375	65276	63510	51539	96269	120840	86010	62778	65171	66777	62728	61330	61742	71692	148640	116660	125950	56589	57178	54584
MWSHY0124	257.08	153.02	256.074	C15H12O4	[M+H]+	Pinocembrin (Dihydrochrysin)	Flavonoids	Flavanones	480-39-7	2	490960	457580	357780	863280	739190	872420	785130	623670	817680	656800	563850	662080	8912.3	6134.6	5763.9	6146.8	8418.5	9192.6	8410.6	7270.9	8030.6	6885.7	19826	5589.7	30112	26335	54244	17359	15025	24172	20566	17234	37742	68901	51362	54148	212600	198520	197500
mws1175	271.1	167.04	270.089	C16H14O4	[M+H]+	Pinostrobin	Flavonoids	Flavanones	480-37-5	2	159820	135050	105530	247730	253500	285530	242270	209410	290610	221720	207480	223690	1733.9	2702.2	627.92	366.71	1502.6	359.94	1339.1	3503.5	944.57	1274.5	6306.9	321.82	2284.2	2978.2	19865	1888.1	3712.1	4728.2	1821.5	2512.7	1912.7	1230.9	4590.3	2301.5	68239	73739	67023
pme3475	273.08	153	272.068	C15H12O5	[M+H]+	Butin	Flavonoids	Flavanones	492-14-8	3	973320	1143100	975450	1370900	1331000	1422400	1241300	1202900	1271200	1267200	1158800	1255300	1035600	1158100	735140	1161000	1115200	1204800	1391700	1176100	1304200	1307500	1170100	1146500	1824900	2000700	2140800	2836900	2227600	2799300	2320900	2639100	2867400	1981800	1875200	1767300	1728000	1506200	1338900
pme0376	271.06	151	272.068	C15H12O5	[M-H]-	Naringenin (5,7,4'-Trihydroxyflavanone)	Flavonoids	Flavanones	480-41-1	1	1249900	1101400	884460	1510000	1363900	1590600	1363700	1266100	1316300	1469600	1301500	1456300	1167600	1469900	821640	1321000	1390600	1402400	1694100	1415300	1527800	1486600	1450200	1403500	2334700	2131300	2597200	3343200	2892000	3426800	2872000	3248700	3545300	2597500	2522700	2451500	1509100	1553400	1698700
pme1662	287.08	167	286.084	C16H14O5	[M+H]+	5,4'-Dihydroxy-7-methoxyflavanone (Sakuranetin)	Flavonoids	Flavanones	2957-21-3	3	84619	67705	73027	77102	61182	93714	113870	63220	53288	78825	67091	116650	1518.5	2926.9	388.16	427.86	1514.3	621.17	855.45	9	694.91	9	1521.5	1997.5	8816.5	1738.4	11214	5661	13742	9752.3	24773	2231.8	20212	8986	8332	2845.6	27901	30604	26947
mws0064	287.06	135	288.063	C15H12O6	[M-H]-	Eriodictyol (5,7,3',4'-Tetrahydroxyflavanone)	Flavonoids	Flavanones	552-58-9	1	156200	121800	147230	116630	102080	126980	117960	110030	106850	205910	147850	145190	169290	162730	181790	137860	119210	139520	162940	184680	171260	146070	158640	158060	379150	446650	539280	484420	362210	468050	508450	422050	510480	742310	614720	705890	246720	253510	206120
mws0058	299.06	284	300.063	C16H12O6	[M-H]-	Diosmetin (5,7,3'-Trihydroxy-4'-methoxyflavone)	Flavonoids	Flavanones	520-34-3	3	19520	25428	32838	73222	73426	74122	77008	81492	73292	27074	30780	33600	21286	14471	17949	107850	86401	122480	86220	72059	85299	44474	88045	41140	41407	57329	43542	224080	158930	174490	173030	254090	196050	45670	37472	36679	63009	57813	63080
pmc1990	299.1	223.1	300.1	C17H16O5	[M-H]-	4'-Hydroxy-5,7-dimethoxyflavanone	Flavonoids	Flavanones	-	3	10990000	13159000	10803000	13503000	11192000	11506000	14190000	10639000	10565000	14985000	17050000	16631000	12136000	10030000	6879700	12001000	15995000	18802000	17528000	16062000	17215000	15071000	12671000	15342000	20634000	18969000	15916000	16305000	12974000	12870000	10628000	12036000	12246000	16758000	18827000	17354000	5044000	5485200	5675300
Hmqn003268	303.05	151.03	304.059	C15H12O7	[M-H]-	5,7,3',4',5'-Pentahydroxydihydroflavone	Flavonoids	Flavanones	-	1	4304500	2156400	3167400	1739500	1839100	1794000	1727200	1601600	1514200	3059600	2396300	2647000	2535400	2604400	2403100	1841000	1530800	2147500	2299100	2420200	2310900	2747000	2646100	2233600	2819600	4524000	2929500	2841800	3599100	2423100	1871300	2550200	1930800	3115000	2390500	2867200	2135900	2403300	2469500
[truncated: 155 more rows]
[truncated: 58 more columns]
