# Supplementary material for: Metabolic Variations among Three New Tea Varieties Cultivated in Shandong, China
Source: Foods. 2023 Mar 18;12(6):1299. doi: 10.3390/foods12061299 (PMC10048610; doi:10.3390/foods12061299)
Supplement: Supplementary file 1 [file foods-12-01299-s001.zip › Table S2.xlsx]

## Sheet: Table S2 The cluster distributi
ID	Group
N-Acetyl-L-glycine	1
Creatine	1
Coumarin	1
(E)-Cinnamamide	1
3-Methoxybenzoic acid	1
N-Acetyl-L-threonine	1
D-Mannose	1
Cinnamoylglycine	1
2'-Deoxyadenosine	1
Naringenin chalcone	1
Phloretin	1
Dihydromyricetin (Ampelopsin)	1
5-Glucosyloxy-2-Hydroxybenzoic acid methyl ester	1
6-O-Feruloyl-D-glucose	1
Dehydrodiconiferyl alcohol	1
Isolariciresinol	1
3-O-Feruloylquinic acid	1
5-O-Feruloylquinic acid	1
Trihydroxycinnamoylquinic acid	1
Swertiamarin	1
Quercetin-3-O-Sulfonate	1
Ribosyladenosine	1
Apigenin-7-O-glucoside(Cosmosiin)*	1
Sophoricoside	1
Apigenin-3'-O-α-D-glucopyranoside*	1
Galangin-7-O-glucoside	1
Genistein-7-O-galactoside	1
4',5-Dihydroxyisoflavone-7-O-galactoside	1
Naringenin-7-O-glucoside (Prunin)	1
Dihydrocharcone-4'-O-glucoside	1
Phloretin-2'-O-glucoside (Phlorizin)	1
LysoPC 12:0	1
Myricetin-3-O-xyloside*	1
Myricetin-3-O-arabinoside*	1
Taxifolin-3-O-rhamnoside (Astilbin)	1
Chrysoeriol-7-O-glucoside	1
Dihydromyricetin-3-O-glucoside	1
3-O-p-Coumaroylshikimic acid-O-glucoside	1
Arjunic Acid	1
Sinapoyl-p-coumaroyltartaric acid	1
D-Panose	1
Secoisolariciresinol-9'-O-glucoside	1
Apigenin-6-C-xyloside-8-C-arabinoside	1
Orientin-6-C-arabinoside	1
Quercetin-3,7-Di-O-rhamnoside	1
Didymin (Isosakuranetin-7-O-rutinoside)	1
"Eriodictyol-7-O-(6""-O-p-coumaroyl)glucoside"	1
Kaempferol-3-O-sophoroside	1
Meratin	1
Apigenin-7-O-glucoside-4'-O-rutinoside	1
Quercetin-3-O-rutinoside-7-O-rhamnoside	1
Quercetin-3-O-(2''-O-Rhamnosyl)rutinoside	1
Procyanidin C1 3'-O-gallate	1
Indole	2
D-Threose	2
D-Proline betaine	2
Indole-3-carboxaldehyde	2
p-Hydroxyphenyl acetic acid	2
3-Indoleacetonitrile	2
8-Aminooctanoic Acid	2
2-Propylsuccinic acid	2
D-Fucose	2
4-Phenylbutyric acid	2
2',4',6'-Trihydroxyacetophenone	2
Homogentisic acid	2
3,4-Dihydroxybenzeneacetic acid	2
Norepinephrine	2
Pyridoxine	2
Indole 3-acetic acid (IAA)	2
7-Methoxycoumarin	2
Propyl 4-hydroxybenzoate	2
4-Pyridoxic acid	2
3-amino-2-naphthoic acid	2
3-Indoleacrylic acid	2
Methyl caffeate	2
4-Hydroxy-3-methoxymandelate	2
L-Tryptophan	2
1-Methoxy-indole-3-acetamide	2
Methoxyindoleacetic acid	2
Methyl dioxindole-3-acetate	2
Biotin	2
N-Acetyl-L-Tryptophan	2
Inosine	2
Salicin	2
Apigenin-7,4'-dimethyl ether	2
Isopimaric acid*	2
Pimaric acid*	2
Kaurenoic Acid	2
3-O-p-Coumaroylshikimic acid	2
3-Galloylshikimic acid	2
p-Coumaric acid-4-O-glucoside	2
Phenylpropionic acid-O-β-D-glucopyranoside	2
2'-Deoxyadenosine-5'-monophosphate	2
Pyridoxine-5'-O-glucoside	2
5,7,3',4'-Tetramethoxyflavone	2
Scutellarein tetramethyl ether	2
Neochlorogenic acid (5-O-Caffeoylquinic acid)	2
Ferulic acid-4-O-glucoside	2
Pinoresinol*	2
Epipinoresinol*	2
Isofraxidin-7-O-glucoside	2
Kaempferol-3-O-arabinoside	2
Kaempferol-3-O-arabinoside (Juglanin)	2
Kaempferol-3-O-rhamnoside (Afzelin)(Kaempferin)	2
Kaempferol-7-O-rhamnoside	2
Prunetin-5-O-glucoside	2
3'-Methoxydaidzin	2
Acacetin-7-O-galactoside*	2
Acacetin-7-O-glucoside (Tilianin)*	2
Pratensein-7-O-glucoside	2
Myricetin-3-O-rhamnoside (Myricitrin)	2
Hesperetin-7-O-glucoside	2
Maplexin D (2,4-Di-O-Galloyl-1,5-Anhydro-D-Glucitol)*	2
3,4-Dihydrocatalposide	2
Pinoresinol-4-O-glucoside	2
Myricetin-3-O-(6''-acetyl)glucoside	2
Centaurein	2
Apigenin-6,8-di-C-arabinoside*	2
Apigenin-6-C-arabinoside-8-C-xyloside*	2
5'-Methoxyisolariciresinol-9'-O-glucoside	2
Kaempferol-3-O-arabinoside-7-O-rhamnoside	2
Myricetin-3-O-(6''-malony)glucoside	2
Kaempferol-3-O-(4''-p-coumaroyl)rhamnoside	2
Apigenin-7-O-rutinoside (Isorhoifolin)	2
Kaempferol-3-O-(6''-p-Coumaroyl)glucoside (Tiliroside)*	2
Kaempferol-3-O-(2''-p-Coumaroyl)galactoside*	2
Luteolin-7-O-(6''-caffeoyl)rhamnoside	2
Kaempferol-3-O-(6''-p-Coumaroyl)galactoside*	2
Eriodictyol-7-O-Rutinoside (Eriocitrin)	2
Kaempferol-3-O-(6''-galloyl)galactoside*	2
Kaempferol-3-O-(2''-galloyl)galactoside*	2
Quercetin-3-O-(6''-galloyl)galactoside	2
N-Methylglycine	3
2-Piperidone	3
Tartronate semialdehyde	3
β-Hydroxyisovaleric acid	3
Nicotinic acid (Vitamin B3)	3
Isonicotinic acid	3
2-Picolinic acid	3
Imidazol-1-yl-acetic acid	3
Oxaloacetic acid	3
Glutaric acid	3
Ethylmalonic acid	3
3-Ureidopropionic Acid	3
S-Methyl-L-cysteine	3
O-Phosphorylethanolamine	3
4-Guanidinobutyric acid	3
4-Hydroxymandelonitrile	3
6-O-methylguanine	3
2-Amino-3-methoxybenzoic acid	3
N-α-Acetyl-L-ornithine	3
2-Propylmalic Acid*	3
2-Isopropylmalic Acid	3
3-Isopropylmalic Acid*	3
Methyl 2,4-dihydroxyphenylacetate	3
N-Acetyl-L-Methionine	3
D-Panthenol	3
Jasmonic acid	3
Methyl jasmonate	3
Ribulose-5-phosphate	3
p-Coumaroylagmatine	3
Methyl linolenate	3
17-Hydroxylinolenic acid	3
3,3',4-O-Trimethylellagic acid	3
5-O-Galloyl-methyl quinine ester	3
Vogeloside	3
Thiamine pyrophosphate	3
Benzyl-(2''-O-glucosyl)glucoside	3
Lariciresinol-4'-O-glucoside	3
6-O-VeratroylCatalpol	3
Olivil-4'-O-glucoside	3
Cycloolivil-6-O-glucoside	3
Apigenin-7-O-(6''-p-Coumaryl)glucoside	3
Procyanidin B3	3
Genistein-7-O-galactoside-rhamnose	3
Rhoifolin	3
1-α-Linolenoyl-glycerol-2,3-di-O-glucoside*	3
Theaflavin-3-gallate	3
Theaflavin-3'-Gallate	3
Theaflavin-3,3'-di-O-gallate	3
L-Pipecolic Acid	4
4-Hydroxy-2-Oxopentanoic Acid	4
Monomethyl succinate	4
2-Methylsuccinic acid	4
2-Hydroxy-2-methyl-3-oxobutanoic acid	4
Dimethylmalonic acid	4
Rhamnose	4
2-Hydroxy-3-phenylpropanoic acid	4
3-(4-Hydroxyphenyl)-propionic acid	4
Erythorbic Acid; Isoascorbic Acid	4
D-Glucurono-6,3-lactone	4
(S)-2-Hydroxy-3-(4-Hydroxyphenyl)Propanoic Acid	4
Indole-3-lactic acid	4
3-[(1-Carboxyvinyl)oxy]benzoic acid	4
Methyl Syringate	4
Nicotinate D-ribonucleoside	4
Isoscutellarein	4
2'-Hydroxygenistein	4
Aureusidin	4
Luteolin (5,7,3',4'-Tetrahydroxyflavone)	4
3,4,2',4',6'-Pentahydroxychalcone	4
Phloroglucinol-1-O-β-D-glucopyranoside	4
3-Hydroxyphloretin	4
Diosmetin (5,7,3'-Trihydroxy-4'-methoxyflavone)	4
Hispidulin (5,7,4'-Trihydroxy-6-methoxyflavone)	4
2-(Dimethylamino)guanosine	4
N6-(2-Hydroxyethyl)adenosine	4
Nepetin (5,7,3',4'-Tetrahydroxy-6-methoxyflavone)	4
Protocatechuic acid-4-O-glucoside	4
1-O-Gentisoyl-D-glucoside	4
Tricin (5,7,4'-Trihydroxy-3',5'-dimethoxyflavone)	4
4',5,7-Trihydroxy-3',6-dimethoxyflavone (Jaceosidin)	4
5-O-Caffeoylshikimic acid	4
O-Feruloyl 4-hydroxycoumarin	4
5-O-p-Coumaroylquinic acid*	4
6-DeoxyCatalpol	4
3'-Adenylic Acid	4
Adenosine 2'-Phosphate	4
Cryptochlorogenic acid (4-O-Caffeoylquinic acid)*	4
Chlorogenic acid (3-O-Caffeoylquinic acid)*	4
1-O-Feruloyl-D-Glucose	4
5-Hydroxy-6,7,3',4'-tetramethoxyflavone	4
Chlorogenic acid methyl ester	4
Theaflagallin	4
1-O-Feruloyl-3-O-caffeoylglycerol	4
Apigenin-8-C-Glucoside (Vitexin)	4
Apigenin-6-C-glucoside (Isovitexin)	4
Genistein-8-C-glucoside	4
6-C-Glucosyl-2-Hydroxynaringenin	4
Aromadendrin-7-O-glucoside	4
3-Hydroxyphloretin-4'-O-glucoside	4
Epicatechin-3-(3''-O-methyl)gallate	4
3,3'-O-Dimethylellagic Acid-4'-O-arabinoside	4
6-Methoxykaempferol-3-O-glucoside	4
Isorhamnetin-3-O-Glucoside*	4
3'-O-Methyltricetin-7-O-glucoside	4
Nepetin-7-O-glucoside	4
Persicoside	4
Epigallocatechin-3-O-(3,5-O-dimethyl)gallate	4
Aurantio-obtusin-6-O-Glucoside	4
Tricin-7-O-Glucoside	4
5,7,4'-Trihydroxy-6,8-dimethoxyisoflavone-7-O-galactoside	4
Jaceosidin-7-O-Glucoside	4
Laricitrin-3-O-glucoside	4
3,6-Di-O-caffeoyl glucose*	4
1,6-Di-O-caffeoyl-β-D-glucose*	4
Tricin-7-O-Glucuronide	4
Isochlorogenic acid B	4
3,5-Dicaffeoylquinic acid	4
Rosmarinic acid-3'-O-glucoside	4
4,5-O-Dicaffeoylquinic Acid Methyl Ester	4
Apigenin-8-C-(2''-xylosyl)glucoside*	4
Genistein-8-C-apiosyl(1→6)glucoside	4
Isovitexin-8-O-xylcoside	4
Isovitexin-2''xyloside	4
Apigenin-6-C-(2''-xylosyl)glucoside*	4
Apigenin-6-C-(2''-glucuronyl)xyloside	4
Vitexin-2''-O-rhamnoside	4
Isovitexin-2''-O-rhamnoside	4
Saponarin(Isovitexin-7-O-glucoside)	4
"Vitexin-2""-O-galactoside"	4
4'-O-Glucosylvitexin	4
Isosaponarin(Isovitexin-4'-O-glucoside)	4
Diosmetin-8-C-(2''-O-rhamnosyl)glucoside	4
Chrysoeriol-5,7-di-O-glucoside	4
Hispidulin-8-C-(2''-O-glucosyl)glucoside	4
Chrysoeriol-7-O-gentiobioside	4
Tricin-7-O-rutinoside*	4
Tricin-7-O-neohesperidoside*	4
Tricin-7-O-(2''-O-glucosyl)glucoside	4
Syringoylcaffeoylquinic acid-D-glucose	4
Apigenin-6,8-di-C-glucoside-4'-O-glucoside	4
Apigenin-8-C-glucoside-7-O-Sophoroside	4
Saponarin-4'-O-glucoside	4
Apigenin-6-C-glucoside-7-O-Sophoroside	4
Benzaldehyde	5
Pterolactam	5
L-Proline	5
5-Oxoproline	5
N-Acetylputrescine	5
L-Ornithine	5
4-Methyl-5-thiazoleethanol	5
Methyl L-pyroglutamate	5
Allysine(6-Oxo DL-Norleucine)	5
L-threo-3-Methylaspartate	5
Guanine	5
Phenoxyacetic acid	5
L-Histidine	5
Orotic acid	5
4-Hydroxy-L-glutamic acid	5
NG,NG-Dimethyl-L-arginine	5
N-Acetyl-L-phenylalanine	5
Chrysin	5
1-O-Caffeoylglycerol	5
Choline Alfoscerate	5
D-Glucosamine 1-phosphate	5
Pinostrobin Chalcone	5
Epiafzelechin	5
Afzelechin (3,5,7,4'-Tetrahydroxyflavan)	5
Maritimetin	5
2R-hydroxy-9Z,12Z,15Z-octadecatrienoic acid	5
9-Oxo-12Z-Octadecenoic acid	5
Rhamnocitrin (7-Methylkaempferol)	5
Pratensein	5
6,7,8-Tetrahydroxy-5-methoxyflavone	5
Rhamnetin	5
2'-Deoxyinosine-5'-monophosphate	5
2-O-Galloyl-D-glucose	5
Erucic acid	5
Roseoside	5
Loganin	5
Chrysin-5-O-glucoside (Toringin)*	5
Chrysin-7-O-glucoside*	5
Pinocembrin-7-O-glucoside (Pinocembroside)	5
3,4,2',4',6'-Pentahydroxychalcone-4'-O-glucoside	5
Epicatechin glucoside	5
L-Aspartic acid-O-diglucoside	5
Corosolic acid	5
Hederagenin	5
2,3-dihydroxy-12-ursen-28-oic acid	5
Solatriose	5
Matairesinol-4'-O-glucoside (Matairesinoside)	5
Epicatechin-epiafzelechin	5
Quercetin-3-O-robinobioside*	5
DMelezitose O-rhamnoside	5
Theaflavate B;3'-O-(3,4,5-Trihydroxybenzoyl)	5
Quercetin-3-O-(2''-O-rhamnosyl)rutinoside-7-O-glucoside	5
2-Aminoethanesulfinic acid	6
Isocytosine	6
Salicylic acid	6
2,2-Dimethylsuccinic acid	6
7-Hydroxycoumarin	6
p-Coumaric acid	6
2,6-Dimethoxybenzaldehyde	6
N-Alpha-Acetyl-L-Asparagine	6
Caffeic acid	6
3-Phospho-D-glyceric acid	6
Homoarginine	6
N-Monomethyl-L-arginine*	6
Arginine methyl ester*	6
Dimethyl Phthalate	6
S-(2-Carboxypropyl)cysteine	6
5-L-Glutamyl-L-amino acid	6
N,N-Dimethyl-5-methoxytryptamine	6
p-Coumaroylputrescine	6
L-Aspartyl-L-Phenylalanine	6
Nicotianamine	6
1-O-Caffeoyl xylose	6
3-O-Methylellagic acid	6
3,3'-O-Dimethylellagic Acid	6
1-(sn-Glycero-3-phospho)-1D-myo-inositol	6
D-Glucose 1,6-bisphosphate	6
Ajugol	6
Kaempferol-3-O-glucoside (Astragalin)*	6
Eriodictyol-8-C-glucoside	6
Dicaffeoylshikimic acid	6
2-α-Linolenoyl-glycerol-1-O-glucoside*	6
1-α-Linolenoyl-glycerol-3-O-glucoside*	6
1,3-Dicaffeoylquinic acid	6
Isochlorogenic acid A	6
Isochlorogenic acid C	6
Theaflavin	6
Pinocembrin-7-O-neohesperidoside	6
Pinocembrin-7-O-rutinoside	6
Epitheaflavic acid-3-O-Gallate	6
Kaempferol-3-O-sambubioside	6
Gambiriin A1	6
8,8'-Methylenebiscatechin	6
Procyanidin A6	6
Kaempferol-3-O-rutinoside(Nicotiflorin)	6
Luteolin-7-O-neohesperidoside (Lonicerin)	6
Kaempferol-3-O-robinobioside(Biorobin)	6
Quercetin-3-O-rutinoside (Rutin)*	6
Orientin-7-O-glucoside	6
Quercetin-3-O-glucoside-7-O-rhamnoside	6
Quercetin-3-O-(4''-O-glucosyl)rhamnoside	6
Quercetin-3-O-sophoroside (Baimaside)	6
3,4,5-Tricaffeoylquinic acid	6
Luteolin-7-O-(2''-O-rhamnosyl)rutinoside	6
Kaempferol-3-O-robinoside-7-O-rhamnoside (Robinin)	6
Clitorin	6
Quercetin-3-O-(2''-O-arabinosyl)rutinoside	6
Quercetin-7-O-rutinoside-4'-O-glucoside	6
3-Hydroxypropanoic acid	7
2-Hydroxybutyric Acid	7
3-Methylbenzaldehyde	7
4-Methylbenzaldehyde	7
Nicotinic Acid Methyl Ester(Methyl Nicotinate)	7
Perillyl alcohol	7
3-Hydroxyanthranilic acid	7
7-Hydroxy-4H-chromen-4-one	7
4-hydroxyphenyl acrylaldehyde	7
3-Hydroxycinnamic Acid*	7
α-Hydroxycinnamic Acid*	7
Quinic Acid	7
N-(beta-D-Glucosyl)nicotinate	7
1-O-Cinnamoyl-β-D-glucose	7
Demethyl coniferin	7
Androsin	7
2,3,5,4'-Tetrahydroxystilbene-2-O-glucoside	7
Grandidentatin	7
10-Formyltetrahydrofolic Acid	7
Kaempferol-3-O-(6''-acetyl)glucoside	7
Quercetin-3-O-(6''-acetyl)galactoside	7
Kaempferol-3-O-(6''-malonyl)galactoside*	7
Kaempferol-3-O-(6''-malonyl)glucoside*	7
Eriodictyol-7-O-(6''-malonyl)glucoside	7
Quercetin-3-O-(6''-malonyl)galactoside	7
Hesperetin-7-O-(6''-malonyl)glucoside	7
Quercetin-3-O-rhamnosyl(1→2)arabinoside	7
Naringenin-7-O-Neohesperidoside(Naringin)	7
Naringenin-7-O-Rutinoside(Narirutin)	7
Neoeriocitrin	7
Verbascoside	7
3-Ethoxy-3-oxopropanoic acid	8
Oxindole	8
Phenyl acetate	8
4'-Hydroxyacetophenone	8
p-Coumaryl alcohol	8
Methyl 4-hydroxybenzoate	8
Dopamine	8
2-Hydroxycinnamic acid*	8
2-(Formylamino)benzoic acid	8
Phosphoenolpyruvate	8
4-Methoxyphenylpropionic acid	8
N-Feruloylputrescine	8
Galangin (3,5,7-Trihydroxyflavone)	8
Pinobanksin	8
Aromadendrin (Dihydrokaempferol)	8
10,16-Dihydroxypalmitic acid	8
4-O-Glucosyl-4-hydroxybenzoic acid	8
1-O-Salicyl-D-glucose	8
Glucosyloxybenzoic acid	8
Dehydroabietic acid	8
3-Hydroxyoctadecanoic Acid	8
Ferulic acid-1-O-glucoside	8
Mearnsetin	8
D-Maltose	8
Guanosine 3',5'-cyclic monophosphate	8
Inosine 5'-monophosphate	8
N-Feruloylserotonin	8
Homovanilloylquinic acid	8
Blumenol C glucoside	8
5'-Glucosyloxyjasmanic acid	8
Quercetin-3-O-arabinoside (Guaijaverin)	8
Isohemiphloin	8
Sec-O-glucosylhamaudol	8
Catechin-(7,8-bc)-4β-(3,4-dihydroxyphenyl)-dihydro-2-(3H)-one	8
Yuanhuanin	8
Diosmetin-7-O-galactoside*	8
Diosmetin-7-O-glucoside*	8
6-C-MethylKaempferol-3-glucoside	8
Hispidulin-7-O-Glucoside	8
3'-O-D-glucosylgentiopicroside	8
Icariside E5	8
Isorhamnetin-3-O-(6''-malonylglucoside)	8
Luteolin-6-C-rhamnoside-7-O-glucoside	8
Isoorientin-7-O-glucoside	8
Hesperidin*	8
Hesperetin-7-O-neohesperidoside(Neohesperidin)*	8
Eriodictyol-8-C-glucoside-4'-O-glucoside	8
Isorhamnetin-3-O-rutinoside (Narcissin)	8
Tamarixetin-3-O-rutinoside	8
Isorhamnetin-3-O-glucoside-7-O-rhamnoside*	8
Tamarixetin-3-O-glucoside-7-O-rhamnoside	8
6-C-Methylquercetin-3-O-rutinoside	8
Isorhamnetin-3-O-neohesperidoside*	8
Hesperetin-8-C-glucoside-3'-O-glucoside	8
Luteolin-7-O-rutinoside-5-O-rhamnoside	8
Quercetin-3-O-sophoroside-7-O-rhamnoside	8
Methyl Pentagalloyl gallate	8
Cadaverine	9
γ-Aminobutyric acid	9
Pyrogallol	9
Methyl 2-furoate	9
2-n-Propyl-2-pentenoic acid	9
2,4,6-Trihydroxybenzoic acid	9
4-O-Methylgallic Acid	9
Methyl gallate	9
3-O-Methylgallic Acid	9
Antiarol; 3,4,5-Trimethoxyphenol	9
4-Hydroxy-3,5-dimethoxybenzyl alcohol	9
(E)-Linalool-1-oic acid	9
Methyl sinapate	9
Phenyl-β-D-glucopyranoside	9
Ellagic acid	9
Methyl Brevifolincarboxylate	9
Azaleatin (5-O-Methylquercetin)	9
Digallic Acid	9
Jasmonoyl-L-Isoleucine	9
5-Galloylshikimic acid	9
Galloyl Methyl gallate	9
p-Dimeric galloyl methyl ester	9
D-Sucrose	9
7-O-Galloyl-D-sedoheptulose	9
Benzyl β-primeveroside	9
HydroxyAloe-emodin-8-O-glucoside	9
Kaempferol-4'-O-glucoside*	9
Luteolin-7-O-glucoside (Cynaroside)	9
Dihydrokaempferol-3-O-glucoside	9
Okanin-4'-O-glucoside(Marein)	9
LysoPE 16:1	9
LysoPE 16:1(2n isomer)	9
1-O-Galloyl-2-O-Cinnamoyl-β-D-glucose	9
4,6-(S)-Hexahydroxydiphenoyl-β-D-glucose	9
1,4-Di-O-Galloyl-D-glucose	9
Digalloylglucose	9
1,6-di-O-galloyl-β-D-glucose*	9
2,3-Di-O-galloyl-D-glucose*	9
Kaempferol-3-O-(2''-acetyl)glucoside	9
LysoPC 16:1	9
3-O-Digalloyl quinic acid	9
Quercetin-3-O-(6''-acetyl)glucoside	9
1,7-Di-O-galloyl-D-sedoheptulose	9
Kaempferol-3-O-galactoside-4'-O-glucoside	9
Corilagin	9
Isocorilagin	9
Isostrictinin	9
1,2,3-Tri-O-galloyl-D-glucose	9
1,4,6-Tri-O-galloyl-β-D-glucose*	9
1,3,6-Tri-O-galloyl-β-D-glucose	9
1,2,6-Tri-O-galloyl-D-glucose*	9
1-(9Z-Octadecenoyl)-2-(9-oxo-nonanoyl)-sn-glycero-3-phosphocholine	9
Kaempferol-3-O-sophoroside-7-O-rhamnoside*	9
Kaempferol-3-O-neohesperidoside-7-O-glucoside*	9
1,2,3,6-Tetra-O-galloyl-β-D-glucose	9
Galloylprocyanidin C2	9
